# Supplementary material for: Invasive margin tissue-resident macrophages of high CD163 expression impede responses to T cell-based immunotherapy
Source: HighWire-hosted journal article supplement (doi:10.1136/jitc-2022-006433), 2023-03-01
Supplement: jitc-2022-006433supp002_data_supplement.xlsx [file jitc-2022-006433supp002_data_supplement.xlsx]

## Sheet: CD163_hi_v_CD163_dim_3.all
Supplementary table 1. All DEG genes of CD163hi versus CD163dim macrophages. Related to Figure 6. Ensembl Stable IDs, base Mean value, log2FoldChange (log2(CD163hi)-log2(CD163dim)), IfcSE, statistics, p-value, p-adjusted value and GeneName of CD163hi macrophages when compared to CD163dim macrophages in the TME of TC-1 tumors treated with therapeutic vaccination.
ID	baseMean	log2FoldChange(log2(CD163_dim)-log2(CD163_hi))	lfcSE	stat	pvalue	p_adjusted	GeneName
ENSMUSG00000030787	113.255	5.19191	0.597692	-8.6866	3.73445e-18	1.3154e-15	Lyve1
ENSMUSG00000051906	89.9159	5.15025	0.592728	-8.68905	3.65473e-18	1.3154e-15	Cd209f
ENSMUSG00000079168	32.7839	4.66702	0.71662	-6.51254	7.38906e-11	6.99467e-09	Cd209g
ENSMUSG00000032725	463.59	4.61756	0.450936	-10.24	1.31297e-24	1.42045e-21	Folr2
ENSMUSG00000049723	487.167	4.21587	0.397071	-10.6174	2.47271e-26	3.12097e-23	Mmp12
ENSMUSG00000019987	251.803	3.76422	0.563078	-6.68509	2.30788e-11	2.44442e-09	Arg1
ENSMUSG00000037161	32.5802	3.5338	0.653153	-5.41038	6.28924e-08	2.81825e-06	Mgarp
ENSMUSG00000050370	273.183	3.50975	0.434327	-8.08087	6.4305e-16	1.52182e-13	Ch25h
ENSMUSG00000085295	237.197	3.44694	0.417128	-8.26351	1.41447e-16	3.5706e-14	4930430E12Rik
ENSMUSG00000009876	24.1811	3.36845	0.705702	-4.77319	1.81326e-06	5.31212e-05	Cox4i2
ENSMUSG00000050578	745.74	3.32567	0.336012	-9.89746	4.27002e-23	3.23369e-20	Mmp13
ENSMUSG00000097848	16.2915	3.30421	0.749203	-4.4103	1.03229e-05	0.000234058	Gm807
ENSMUSG00000022181	80.3719	3.27494	0.597015	-5.48552	4.12246e-08	1.93309e-06	C6
ENSMUSG00000017390	283.909	3.17658	0.367267	-8.64926	5.18359e-18	1.74468e-15	Aldoc
ENSMUSG00000035373	1898.16	3.15522	0.330082	-9.5589	1.19019e-21	6.67652e-19	Ccl7
ENSMUSG00000008845	135.64	3.07759	0.559642	-5.49921	3.81499e-08	1.80006e-06	Cd163
ENSMUSG00000022415	72.7385	2.95169	0.5886	-5.01475	5.31012e-07	1.84662e-05	Syngr1
ENSMUSG00000026938	351.525	2.95068	0.499501	-5.90725	3.47872e-09	2.17722e-07	Fcna
ENSMUSG00000061666	307.069	2.90539	0.445114	-6.5273	6.69679e-11	6.46049e-09	Gdpd1
ENSMUSG00000009185	2157.25	2.84414	0.358166	-7.94086	2.00791e-15	4.34454e-13	Ccl8
ENSMUSG00000097558	54.8503	2.84397	0.547397	-5.19545	2.0423e-07	7.93145e-06	Gm26902
ENSMUSG00000026358	7717.44	2.84095	0.434468	-6.53893	6.19599e-11	6.0938e-09	Rgs1
ENSMUSG00000024672	21054	2.8332	0.286978	-9.87252	5.47712e-23	3.77075e-20	Ms4a7
ENSMUSG00000022432	38.4701	2.83225	0.638511	-4.43571	9.17686e-06	0.000212203	Smc1b
ENSMUSG00000020264	14.6438	2.81086	0.753067	-3.73255	0.000189553	0.0025497	Slc36a2
ENSMUSG00000103899	51.0137	2.79268	0.676983	-4.12519	3.70433e-05	0.000662407	Gm37940
ENSMUSG00000040552	19210.4	2.74801	0.318381	-8.6312	6.07108e-18	1.95644e-15	C3ar1
ENSMUSG00000035352	1532.38	2.71279	0.329728	-8.22735	1.91409e-16	4.75258e-14	Ccl12
ENSMUSG00000039809	13.2082	2.70619	0.757179	-3.57404	0.000351514	0.00425242	Gabbr2
ENSMUSG00000050103	42.7921	2.70289	0.644625	-4.19297	2.7533e-05	0.000519968	Agmo
ENSMUSG00000038508	52.7442	2.68501	0.611279	-4.39244	1.12086e-05	0.000249913	Gdf15
ENSMUSG00000108239	20.4796	2.68284	0.69095	-3.88282	0.000103252	0.00156699	Gm19434
ENSMUSG00000071311	99.1385	2.66016	0.464955	-5.72132	1.05702e-08	5.84291e-07	Gpr31b
ENSMUSG00000015852	505.967	2.64678	0.345325	-7.66461	1.79369e-14	3.3959e-12	Fcrls
ENSMUSG00000020053	95.8602	2.6275	0.556311	-4.72307	2.3231e-06	6.55227e-05	Igf1
ENSMUSG00000070427	8022.56	2.61029	0.297074	-8.78667	1.54052e-18	5.8332e-16	Il18bp
ENSMUSG00000090939	34.6406	2.60538	0.616396	-4.2268	2.37038e-05	0.000457347	Gm17147
ENSMUSG00000029919	2061.39	2.59937	0.31905	-8.14722	3.72374e-16	9.09675e-14	Hpgds
ENSMUSG00000031451	241.149	2.59368	0.533665	-4.86013	1.17309e-06	3.64838e-05	Gas6
ENSMUSG00000044309	445.462	2.52224	0.427664	-5.89773	3.68533e-09	2.29704e-07	Apol7c
ENSMUSG00000024401	436.737	2.52046	0.424443	-5.93828	2.88032e-09	1.84853e-07	Tnf
ENSMUSG00000033470	243.909	2.5084	0.383956	-6.53305	6.44442e-11	6.25687e-09	Cysltr2
ENSMUSG00000024535	127.139	2.50644	0.456807	-5.48687	4.09112e-08	1.92435e-06	Snx24
ENSMUSG00000042684	85.4663	2.48602	0.536262	-4.63583	3.55501e-06	9.54685e-05	Npl
ENSMUSG00000029373	578.348	2.4754	0.434228	-5.70069	1.1932e-08	6.38594e-07	Pf4
ENSMUSG00000087362	118.623	2.47141	0.554374	-4.45801	8.27226e-06	0.00019395	Gm13710
ENSMUSG00000025150	474.778	2.46757	0.45394	-5.4359	5.45216e-08	2.49482e-06	Cbr2
ENSMUSG00000105769	15.1957	2.46357	0.740805	-3.32554	0.000882486	0.00888115	Gm43351
ENSMUSG00000039115	353.403	2.46052	0.40371	-6.09476	1.09602e-09	7.86748e-08	Itga9
ENSMUSG00000052485	583.496	2.4526	0.316123	-7.75838	8.60215e-15	1.71432e-12	Tmem171
ENSMUSG00000099398	456.826	2.44987	0.390261	-6.27753	3.43993e-10	2.80113e-08	Ms4a14
ENSMUSG00000074345	71.9239	2.44088	0.551529	-4.42567	9.61454e-06	0.000220974	Tnfaip8l3
ENSMUSG00000017412	82.3723	2.43079	0.468732	-5.18588	2.15001e-07	8.30714e-06	Cacnb4
ENSMUSG00000025978	39.9714	2.42701	0.605488	-4.00835	6.11441e-05	0.00100771	Rftn2
ENSMUSG00000016283	81.8905	2.42461	0.548249	-4.42247	9.75811e-06	0.000223934	H2-M2
ENSMUSG00000052403	94.7585	2.42399	0.628574	-3.85633	0.000115103	0.0017078	Fcnaos
ENSMUSG00000022304	10.877	2.42213	0.767813	-3.15458	0.00160731	0.0141701	Dpys
ENSMUSG00000027848	1758.29	2.42165	0.328951	-7.36172	1.81558e-13	2.89461e-11	Olfml3
ENSMUSG00000040950	201.277	2.40424	0.444786	-5.40538	6.46698e-08	2.85565e-06	Mgl2
ENSMUSG00000023960	174.681	2.38713	0.47992	-4.97402	6.55799e-07	2.19266e-05	Enpp5
ENSMUSG00000028459	27364.3	2.3865	0.325364	-7.33486	2.21958e-13	3.41563e-11	Cd72
ENSMUSG00000029333	2382.61	2.37049	0.441665	-5.36717	7.99802e-08	3.44142e-06	Rasgef1b
ENSMUSG00000031551	37.6953	2.35443	0.604968	-3.89183	9.94912e-05	0.00151905	Ido1
ENSMUSG00000086813	20.8874	2.33543	0.672827	-3.47108	0.000518376	0.00579862	Gm13657
ENSMUSG00000018920	27592.3	2.33266	0.293513	-7.94737	1.90517e-15	4.2435e-13	Cxcl16
ENSMUSG00000054675	1750.75	2.33201	0.294198	-7.92667	2.25101e-15	4.80194e-13	Tmem119
ENSMUSG00000040829	7610.55	2.33122	0.311189	-7.49133	6.81789e-14	1.20074e-11	Zmynd15
ENSMUSG00000022303	13.0927	2.31347	0.744867	-3.10588	0.00189714	0.0160811	Dcstamp
ENSMUSG00000045551	1842.46	2.30234	0.323322	-7.12089	1.07232e-12	1.45012e-10	Fpr1
ENSMUSG00000087289	87.697	2.30153	0.485888	-4.73676	2.17163e-06	6.18262e-05	4933424M12Rik
ENSMUSG00000070323	26.6311	2.30113	0.673669	-3.41581	0.000635917	0.00686989	Mmp27
ENSMUSG00000028458	4945.74	2.29681	0.325792	-7.04993	1.79005e-12	2.35757e-10	Tesk1
ENSMUSG00000029417	3166.54	2.29258	0.313784	-7.30623	2.74739e-13	4.12e-11	Cxcl9
ENSMUSG00000021190	69062.1	2.27924	0.308051	-7.3989	1.37319e-13	2.23637e-11	Lgmn
ENSMUSG00000029084	4391.27	2.27039	0.371938	-6.10422	1.03302e-09	7.59519e-08	Cd38
ENSMUSG00000030117	775.842	2.2669	0.308127	-7.35703	1.88054e-13	2.96694e-11	Gdf3
ENSMUSG00000020377	88.2128	2.25746	0.558372	-4.04293	5.27876e-05	0.000890335	Ltc4s
ENSMUSG00000086712	39.5283	2.25183	0.622091	-3.61977	0.000294867	0.00369401	AI427809
ENSMUSG00000040264	2979.16	2.23865	0.296769	-7.54341	4.5784e-14	8.35475e-12	Gbp2b
ENSMUSG00000030865	7.4114	2.22509	0.784743	-2.83543	0.00457637	0.031737	Chp2
ENSMUSG00000033740	29.4094	2.22207	0.652095	-3.40759	0.000655393	0.00704013	St18
ENSMUSG00000020841	358.247	2.22192	0.340022	-6.53463	6.37667e-11	6.23103e-09	Cpd
ENSMUSG00000051319	138.571	2.21349	0.430559	-5.14097	2.73324e-07	1.02216e-05	1500011K16Rik
ENSMUSG00000062082	639.208	2.20985	0.362174	-6.10162	1.04997e-09	7.68253e-08	Cd200r4
ENSMUSG00000002475	14.4278	2.19847	0.744296	-2.95376	0.0031393	0.0237028	Abhd3
ENSMUSG00000087480	10.6912	2.19303	0.76383	-2.8711	0.00409043	0.0292001	Gm15910
ENSMUSG00000029816	544.531	2.17831	0.404655	-5.38312	7.32043e-08	3.18607e-06	Gpnmb
ENSMUSG00000026390	18.9907	2.16483	0.692595	-3.12568	0.00177396	0.0153219	Marco
ENSMUSG00000002108	2119.81	2.15694	0.293765	-7.3424	2.09794e-13	3.27581e-11	Nr1h3
ENSMUSG00000060586	101399	2.13526	0.304293	-7.01712	2.26485e-12	2.90708e-10	H2-Eb1
ENSMUSG00000022408	55.0813	2.1347	0.556261	-3.83759	0.000124247	0.00181997	Fam83f
ENSMUSG00000016498	353.238	2.13443	0.359604	-5.9355	2.92953e-09	1.87218e-07	Pdcd1lg2
ENSMUSG00000102715	7.75715	2.12682	0.785552	-2.70742	0.00678075	0.0427743	Gm6209
ENSMUSG00000059089	9002.27	2.1256	0.28474	-7.46504	8.32743e-14	1.44974e-11	Fcgr4
ENSMUSG00000023961	947.993	2.12462	0.361035	-5.88482	3.9849e-09	2.47358e-07	Enpp4
ENSMUSG00000025855	78.6043	2.12447	0.46927	-4.52718	5.97766e-06	0.000146264	Prkar1b
ENSMUSG00000086150	37.2466	2.11783	0.611195	-3.46506	0.000530116	0.00591247	Bach2os
ENSMUSG00000021720	314.588	2.11289	0.416499	-5.07297	3.91649e-07	1.39904e-05	Rnf180
ENSMUSG00000000149	358.474	2.08839	0.340715	-6.12944	8.81909e-10	6.64547e-08	Gna12
ENSMUSG00000049939	23.35	2.07639	0.7391	-2.80935	0.00496412	0.0336111	Lrrc4
ENSMUSG00000034265	21.3864	2.06424	0.696214	-2.96495	0.00302735	0.0230877	Zdhhc14
ENSMUSG00000031596	30.0803	2.06395	0.64962	-3.17717	0.0014872	0.0134082	Slc7a2
ENSMUSG00000079298	1055.67	2.05519	0.334673	-6.14089	8.20621e-10	6.24579e-08	Klrb1b
ENSMUSG00000084202	73.1221	2.05377	0.479915	-4.27945	1.87359e-05	0.000381174	Gm5398
ENSMUSG00000039007	1595.02	2.04068	0.320667	-6.36387	1.96736e-10	1.69305e-08	Cpq
ENSMUSG00000049130	5409.27	2.02889	0.31381	-6.46535	1.01064e-10	9.27705e-09	C5ar1
ENSMUSG00000074194	14.0148	2.01772	0.745922	-2.705	0.0068304	0.042998	Zfp791
ENSMUSG00000026548	3201.24	2.01588	0.311069	-6.48049	9.14232e-11	8.44326e-09	Slamf9
ENSMUSG00000029372	6.73903	2.00339	0.786077	-2.5486	0.0108158	0.0602706	Ppbp
ENSMUSG00000097887	59.0666	1.9942	0.551266	-3.61749	0.000297475	0.00372053	Gm26542
ENSMUSG00000080241	7.73277	1.98832	0.780406	-2.5478	0.0108404	0.0603414	Dppa3-ps
ENSMUSG00000037418	213.852	1.98553	0.462455	-4.29346	1.75909e-05	0.000362	Best1
ENSMUSG00000070524	168.426	1.98445	0.419199	-4.73392	2.20226e-06	6.23466e-05	Fcrlb
ENSMUSG00000021886	3859.66	1.984	0.313817	-6.32215	2.57948e-10	2.13491e-08	Gpr65
ENSMUSG00000029759	731.082	1.97994	0.340767	-5.81026	6.23761e-09	3.67606e-07	Pon3
ENSMUSG00000090017	16.9477	1.97969	0.737868	-2.68299	0.00729671	0.0450534	Gm16213
ENSMUSG00000016529	52.261	1.97904	0.583233	-3.39323	0.000690734	0.00733136	Il10
ENSMUSG00000031266	1180.55	1.95601	0.296564	-6.59558	4.23607e-11	4.30601e-09	Gla
ENSMUSG00000055172	273.616	1.94775	0.394932	-4.93187	8.14446e-07	2.65282e-05	C1ra
ENSMUSG00000074874	267.759	1.94326	0.38906	-4.99475	5.89124e-07	2.00514e-05	Ctla2b
ENSMUSG00000050395	123.532	1.93864	0.429581	-4.51286	6.39602e-06	0.000154999	Tnfsf15
ENSMUSG00000080814	6.40813	1.93809	0.78614	-2.46532	0.0136891	0.0712246	Gm12314
ENSMUSG00000039910	326.296	1.93595	0.366534	-5.28176	1.27948e-07	5.23759e-06	Cited2
ENSMUSG00000031465	31.5589	1.92533	0.624625	-3.08239	0.00205348	0.0170782	Angpt2
ENSMUSG00000102895	8.78073	1.91734	0.774207	-2.47653	0.0132668	0.0696497	5830415G21Rik
ENSMUSG00000047592	1741.19	1.91396	0.313754	-6.10021	1.05932e-09	7.71368e-08	Nxpe5
ENSMUSG00000048498	6606.26	1.91163	0.356619	-5.36043	8.30251e-08	3.54225e-06	Cd300e
ENSMUSG00000051435	54.2654	1.90539	0.532311	-3.57947	0.000344287	0.00418505	Fhad1
ENSMUSG00000026656	20497.3	1.90192	0.297635	-6.39013	1.65749e-10	1.45112e-08	Fcgr2b
ENSMUSG00000034438	3267.79	1.90059	0.3168	-5.99933	1.98133e-09	1.3397e-07	Gbp8
ENSMUSG00000089753	51.1956	1.89623	0.616295	-3.07682	0.00209224	0.0173016	Gm11709
ENSMUSG00000102037	365.109	1.89418	0.333559	-5.6787	1.35722e-08	7.21279e-07	Bcl2a1a
ENSMUSG00000021477	7602.58	1.89408	0.281428	-6.73025	1.69372e-11	1.85137e-09	Ctsl
ENSMUSG00000064373	18551.8	1.8845	0.354072	-5.32236	1.02428e-07	4.28554e-06	Sepp1
ENSMUSG00000030344	11.4738	1.88194	0.76086	-2.47344	0.013382	0.070133	Akap3
ENSMUSG00000038175	904.161	1.86581	0.370763	-5.03236	4.8448e-07	1.70254e-05	Mylip
ENSMUSG00000050777	997.67	1.86243	0.381481	-4.8821	1.04963e-06	3.32587e-05	Tmem37
ENSMUSG00000078566	997.187	1.86012	0.310218	-5.99615	2.02048e-09	1.35408e-07	Bnip3
ENSMUSG00000013766	11.9453	1.85427	0.744261	-2.49142	0.0127233	0.0676403	Ly6g6e
ENSMUSG00000048824	32.0651	1.85336	0.63523	-2.91762	0.00352719	0.0260345	Gm568
ENSMUSG00000045404	225.422	1.84976	0.399789	-4.62684	3.71295e-06	9.88335e-05	Kcnk13
ENSMUSG00000021752	22.3728	1.84351	0.656937	-2.80622	0.00501266	0.0338634	Kctd6
ENSMUSG00000029802	181.957	1.84046	0.487316	-3.77673	0.000158899	0.00223255	Abcg2
ENSMUSG00000034957	144.49	1.82814	0.45903	-3.98262	6.81602e-05	0.00109476	Cebpa
ENSMUSG00000021322	2033.5	1.82421	0.334698	-5.45031	5.02807e-08	2.32033e-06	Aoah
ENSMUSG00000044827	2685.89	1.82385	0.372124	-4.90119	9.52569e-07	3.03739e-05	Tlr1
ENSMUSG00000052688	3830.2	1.82148	0.310009	-5.87555	4.21445e-09	2.58448e-07	Rab7b
ENSMUSG00000022126	668.8	1.81505	0.343088	-5.29033	1.22095e-07	5.02513e-06	Irg1
ENSMUSG00000027962	1550.05	1.81438	0.434821	-4.1727	3.01015e-05	0.000560784	Vcam1
ENSMUSG00000004730	20460	1.81037	0.322902	-5.60655	2.06399e-08	1.05257e-06	Adgre1
ENSMUSG00000044468	339.549	1.80734	0.409024	-4.41866	9.93166e-06	0.000227253	Fam46c
ENSMUSG00000027399	13.8245	1.80602	0.752756	-2.39921	0.0164306	0.0813792	Il1a
ENSMUSG00000049526	6.02303	1.80554	0.785388	-2.29891	0.02151	0.0981888	Tmem202
ENSMUSG00000047671	34.7371	1.80523	0.610551	-2.95673	0.00310922	0.0235226	Tctex1d4
ENSMUSG00000025165	786.057	1.80286	0.315442	-5.71535	1.09479e-08	5.98617e-07	Sectm1a
ENSMUSG00000051705	91.4109	1.80214	0.44023	-4.09364	4.24646e-05	0.000741833	Senp8
ENSMUSG00000023913	14560.5	1.80038	0.302905	-5.9437	2.78653e-09	1.81136e-07	Pla2g7
ENSMUSG00000066152	2676.12	1.79872	0.307733	-5.84507	5.06343e-09	3.03125e-07	Slc31a2
ENSMUSG00000021038	1850.39	1.79552	0.351047	-5.11475	3.14164e-07	1.15214e-05	Vipas39
ENSMUSG00000020717	3259.58	1.79381	0.357937	-5.01151	5.40052e-07	1.86324e-05	Pecam1
ENSMUSG00000002103	5979.58	1.79136	0.322214	-5.55953	2.705e-08	1.33453e-06	Acp2
ENSMUSG00000072594	199.416	1.78012	0.37331	-4.76846	1.85635e-06	5.4174e-05	Gm16439
ENSMUSG00000103676	7.86292	1.77947	0.77849	-2.2858	0.0222658	0.100578	Gm38204
ENSMUSG00000055541	5118.17	1.77873	0.337827	-5.26523	1.40015e-07	5.62509e-06	Lair1
ENSMUSG00000087263	20.3794	1.77665	0.667065	-2.66338	0.00773604	0.0469128	Gm15726
ENSMUSG00000031497	475.527	1.77032	0.371003	-4.77173	1.82653e-06	5.34065e-05	Tnfsf13b
ENSMUSG00000038642	123446	1.76934	0.294492	-6.00812	1.87683e-09	1.28047e-07	Ctss
ENSMUSG00000010051	33.1678	1.76865	0.585118	-3.02272	0.00250511	0.0199262	Hyal1
ENSMUSG00000020829	146.276	1.7666	0.392331	-4.50283	6.70551e-06	0.000160954	Slc46a1
ENSMUSG00000100108	12.0386	1.7657	0.757004	-2.33249	0.0196752	0.0924032	Gm28100
ENSMUSG00000031312	10.066	1.75396	0.760111	-2.30751	0.0210264	0.0966804	Itgb1bp2
ENSMUSG00000030981	5.08467	1.75084	0.770997	-2.27087	0.0231546	0.103238	Mmp21
ENSMUSG00000036086	106.082	1.75062	0.422859	-4.13995	3.47377e-05	0.000625608	Zranb3
ENSMUSG00000032122	2559.73	1.73501	0.331543	-5.23313	1.66662e-07	6.60765e-06	Slc37a2
ENSMUSG00000029049	15.4013	1.7345	0.710962	-2.43965	0.0147014	0.0748715	Morn1
ENSMUSG00000066363	280.393	1.73378	0.35365	-4.90253	9.46119e-07	3.02319e-05	Serpina3f
ENSMUSG00000046323	20.9834	1.72787	0.674578	-2.5614	0.010425	0.0586731	Dppa3
ENSMUSG00000037406	6.8542	1.72668	0.785968	-2.19689	0.0280284	0.117886	Htra4
ENSMUSG00000104068	17.3589	1.72594	0.686205	-2.51519	0.0118967	0.0646814	Gm37199
ENSMUSG00000044206	5.96312	1.72444	0.783988	-2.19957	0.0278373	0.117379	Vsig4
ENSMUSG00000103032	6.46909	1.71947	0.785514	-2.18898	0.0285983	0.119758	Gm37121
ENSMUSG00000000957	1124.96	1.71654	0.364689	-4.70686	2.51563e-06	6.99113e-05	Mmp14
ENSMUSG00000073758	61.5521	1.71505	0.581743	-2.94812	0.00319712	0.0240913	Sh3d21
ENSMUSG00000021007	24.3302	1.70901	0.656788	-2.60207	0.00926639	0.0537941	Spata7
ENSMUSG00000107586	20.8669	1.70258	0.683602	-2.4906	0.0127527	0.06773	Gm44283
ENSMUSG00000028463	121.339	1.70247	0.426864	-3.98832	6.6543e-05	0.00107964	Car9
ENSMUSG00000031109	242.616	1.70198	0.390478	-4.35872	1.30828e-05	0.000286347	Enox2
ENSMUSG00000024663	6008.47	1.6979	0.294768	-5.76012	8.40526e-09	4.78594e-07	Rab3il1
ENSMUSG00000030806	15.0393	1.69441	0.71521	-2.36911	0.0178307	0.0861998	Stx1b
ENSMUSG00000025511	1017.04	1.69235	0.355892	-4.75523	1.98225e-06	5.74058e-05	Tspan4
ENSMUSG00000028362	123.258	1.69108	0.446669	-3.78598	0.000153106	0.00216189	Tnfsf8
ENSMUSG00000081809	27.7749	1.69096	0.663162	-2.54984	0.0107772	0.0601218	Gm15539
ENSMUSG00000021939	119509	1.68874	0.282535	-5.9771	2.27144e-09	1.49579e-07	Ctsb
ENSMUSG00000006611	4058.65	1.68429	0.306087	-5.50265	3.74124e-08	1.77078e-06	Hfe
ENSMUSG00000042286	1352.61	1.68251	0.309935	-5.42859	5.67995e-08	2.58344e-06	Stab1
ENSMUSG00000032076	1400.04	1.68192	0.341454	-4.92576	8.40327e-07	2.71884e-05	Cadm1
ENSMUSG00000021579	44.89	1.68151	0.597085	-2.8162	0.0048595	0.0331391	Lrrc14b
ENSMUSG00000025154	1135	1.68075	0.366275	-4.58877	4.45875e-06	0.000114075	Arhgap19
ENSMUSG00000057135	3456.16	1.67679	0.306041	-5.47899	4.27767e-08	1.99353e-06	Scimp
ENSMUSG00000072889	164.661	1.67045	0.540325	-3.09157	0.00199101	0.0166791	Nfxl1
ENSMUSG00000031521	536.644	1.66852	0.326143	-5.11592	3.12222e-07	1.14779e-05	Aga
ENSMUSG00000104653	95.8198	1.6666	0.495776	-3.3616	0.000774921	0.00805556	Gm43109
ENSMUSG00000044811	5843.85	1.66581	0.319141	-5.21968	1.79231e-07	7.05101e-06	AF251705
ENSMUSG00000097026	419.46	1.66065	0.346354	-4.79466	1.6295e-06	4.811e-05	Gm26786
ENSMUSG00000072844	249.891	1.66058	0.492241	-3.37352	0.00074214	0.00777886	G530011O06Rik
ENSMUSG00000045410	309.166	1.65813	0.377004	-4.39818	1.09164e-05	0.000245312	Akr1e1
ENSMUSG00000095306	5.70594	1.65648	0.781532	-2.11953	0.034046	0.134567	Gm21807
ENSMUSG00000026958	731.636	1.65144	0.313279	-5.27148	1.35325e-07	5.45114e-06	Dpp7
ENSMUSG00000027082	57.444	1.64252	0.500967	-3.27871	0.00104283	0.0101248	Tfpi
ENSMUSG00000057895	28.298	1.64251	0.637058	-2.57827	0.00992976	0.0566613	Zfp105
ENSMUSG00000087639	426.231	1.64121	0.340894	-4.81443	1.47623e-06	4.43632e-05	Gm15512
ENSMUSG00000082301	156.812	1.6394	0.452185	-3.62551	0.000288396	0.00363398	Gm14032
ENSMUSG00000027670	1544.64	1.6385	0.302048	-5.42462	5.80766e-08	2.62576e-06	Ocstamp
ENSMUSG00000006219	522.942	1.63729	0.356242	-4.59599	4.30704e-06	0.000111512	Fblim1
ENSMUSG00000041481	2460.82	1.63721	0.295946	-5.53212	3.16391e-08	1.53591e-06	Serpina3g
ENSMUSG00000092591	13.3469	1.63412	0.722831	-2.26073	0.0237762	0.104959	Gm20429
ENSMUSG00000090706	187.45	1.63027	0.382086	-4.26675	1.98337e-05	0.000395264	Gm17233
ENSMUSG00000002109	1527.45	1.62908	0.308735	-5.27665	1.31567e-07	5.35677e-06	Ddb2
ENSMUSG00000090942	1285.36	1.62485	0.33846	-4.80071	1.58105e-06	4.68622e-05	F830016B08Rik
ENSMUSG00000025279	3760.79	1.62376	0.304351	-5.33514	9.54711e-08	4.02787e-06	Dnase1l3
ENSMUSG00000101903	11.2291	1.62281	0.745577	-2.17658	0.0295117	0.122294	Gm29291
ENSMUSG00000062101	99.5141	1.62045	0.438033	-3.69937	0.000216133	0.00282934	Zfp119b
ENSMUSG00000025464	125.653	1.6176	0.417689	-3.87273	0.000107623	0.00161391	Paox
ENSMUSG00000041845	50.7921	1.60414	0.530929	-3.02138	0.00251625	0.0199849	Rhod
ENSMUSG00000073555	3111.9	1.60229	0.330206	-4.8524	1.21976e-06	3.75496e-05	Gm4951
ENSMUSG00000097107	18.3894	1.59789	0.692796	-2.30644	0.021086	0.0969062	Platr6
ENSMUSG00000062078	1580.91	1.58842	0.371278	-4.27825	1.88365e-05	0.000381415	Qk
ENSMUSG00000023349	4435.66	1.58696	0.327324	-4.84831	1.2452e-06	3.82552e-05	Clec4n
ENSMUSG00000109089	50.4544	1.58634	0.562459	-2.82036	0.00479702	0.0328461	RP23-366O14.6
ENSMUSG00000027536	40.5375	1.5844	0.548463	-2.88879	0.00386725	0.0279854	Chmp4c
ENSMUSG00000031007	3987.99	1.58326	0.324965	-4.87208	1.10427e-06	3.45028e-05	Atp6ap2
ENSMUSG00000030711	37.5209	1.58299	0.661823	-2.39186	0.016763	0.0826205	Sult1a1
ENSMUSG00000085913	65.886	1.58209	0.512735	-3.08559	0.00203147	0.0169617	Gm15601
ENSMUSG00000013698	4868.35	1.58184	0.294051	-5.37947	7.47059e-08	3.24002e-06	Pea15a
ENSMUSG00000026189	40.5962	1.58168	0.5585	-2.83201	0.00462557	0.0319904	Pecr
ENSMUSG00000107881	8.88767	1.58032	0.767604	-2.05877	0.0395166	0.148848	Gm44250
ENSMUSG00000010307	1837.23	1.57815	0.332194	-4.75068	2.02731e-06	5.83757e-05	Tmem86a
ENSMUSG00000100594	19.79	1.57529	0.670272	-2.35023	0.018762	0.0893332	2810414N06Rik
ENSMUSG00000032359	18967	1.5744	0.28706	-5.48456	4.14497e-08	1.93764e-06	Ctsh
ENSMUSG00000106609	120.122	1.57302	0.417533	-3.76742	0.000164942	0.00229537	Gm43181
ENSMUSG00000090307	3079.2	1.56923	0.298433	-5.25823	1.45446e-07	5.82785e-06	1700071M16Rik
ENSMUSG00000022150	6481.24	1.56699	0.310751	-5.04258	4.59296e-07	1.62156e-05	Dab2
ENSMUSG00000029524	140.83	1.56668	0.398515	-3.9313	8.44869e-05	0.00132331	Sirt4
ENSMUSG00000053318	4256.08	1.56513	0.28812	-5.4322	5.56646e-08	2.53945e-06	Slamf8
ENSMUSG00000032246	14.8248	1.56187	0.713484	-2.18907	0.0285918	0.119758	Calml4
ENSMUSG00000103219	582.894	1.56152	0.367164	-4.25293	2.10996e-05	0.000413957	Gm37787
ENSMUSG00000027956	17.3772	1.56004	0.703798	-2.2166	0.0266506	0.113766	Tmem144
ENSMUSG00000098721	11.8758	1.55933	0.742209	-2.10093	0.0356475	0.138689	Mir6357
ENSMUSG00000036594	139290	1.5588	0.279818	-5.57078	2.53602e-08	1.2761e-06	H2-Aa
ENSMUSG00000030148	2653.92	1.55779	0.304051	-5.12346	2.99981e-07	1.10817e-05	Clec4a2
ENSMUSG00000042029	906.362	1.55663	0.353087	-4.40864	1.04024e-05	0.000235507	Ncapg2
ENSMUSG00000101778	36.3342	1.55459	0.576439	-2.69688	0.00699928	0.0437236	Gm29488
ENSMUSG00000027165	79.7796	1.5539	0.467089	-3.32677	0.00087858	0.00884814	B230118H07Rik
ENSMUSG00000031443	86.7589	1.55243	0.460862	-3.36854	0.000755676	0.00788799	F7
ENSMUSG00000027423	7535.75	1.5484	0.349246	-4.43356	9.26898e-06	0.000214006	Snx5
ENSMUSG00000079057	1633.06	1.54734	0.379859	-4.07346	4.63194e-05	0.000796315	Cyp4v3
ENSMUSG00000022122	170.546	1.54615	0.498903	-3.0991	0.00194108	0.0163604	Ednrb
ENSMUSG00000023087	84.807	1.54599	0.448852	-3.44433	0.000572472	0.00629677	Noct
ENSMUSG00000055184	56.0543	1.54586	0.50009	-3.09117	0.0019937	0.0166832	Fam72a
ENSMUSG00000003752	47.5364	1.54252	0.552403	-2.79238	0.00523217	0.0349257	Itpkc
ENSMUSG00000025058	977.258	1.53762	0.328411	-4.68201	2.8407e-06	7.79443e-05	5430427O19Rik
ENSMUSG00000103260	89.1408	1.53752	0.486331	-3.16147	0.00156976	0.0139856	Gm8146
ENSMUSG00000026986	179.086	1.53722	0.399157	-3.85117	0.000117554	0.00173874	Hnmt
ENSMUSG00000015396	3434.62	1.5359	0.309185	-4.96758	6.77938e-07	2.24684e-05	Cd83
ENSMUSG00000070883	26.0832	1.53575	0.621051	-2.47283	0.0134048	0.07019	Ccdc173
ENSMUSG00000028646	190.167	1.53548	0.390407	-3.93303	8.38805e-05	0.001318	Rragc
ENSMUSG00000036053	88.2646	1.53482	0.503138	-3.05051	0.00228456	0.0184642	Fmnl2
ENSMUSG00000053580	74.5564	1.53425	0.596607	-2.57162	0.0101224	0.0574555	Tanc2
ENSMUSG00000072919	15.4023	1.53319	0.702558	-2.1823	0.0290877	0.121134	Noxred1
ENSMUSG00000046031	5045.49	1.52954	0.286978	-5.32982	9.83103e-08	4.13613e-06	Fam26f
ENSMUSG00000061100	416.315	1.52871	0.526322	-2.90452	0.00367818	0.0268999	Retnla
ENSMUSG00000040957	6.67077	1.52808	0.784043	-1.94898	0.0512982	0.177917	Cables1
ENSMUSG00000025044	5577.56	1.52021	0.310936	-4.88913	1.01283e-06	3.21601e-05	Msr1
ENSMUSG00000060336	16.5931	1.51965	0.711219	-2.13669	0.0326233	0.130891	Zfp937
ENSMUSG00000028644	29.2374	1.51791	0.65969	-2.30094	0.0213951	0.0978709	Ermap
ENSMUSG00000051579	261.648	1.51644	0.358516	-4.22977	2.33928e-05	0.000451923	Tceal8
ENSMUSG00000020818	834.162	1.50761	0.32128	-4.69252	2.69862e-06	7.44505e-05	Mfsd11
ENSMUSG00000035713	51.8763	1.50397	0.518794	-2.89898	0.00374382	0.0273009	Usp35
ENSMUSG00000103596	19.194	1.50358	0.720603	-2.08656	0.0369281	0.142355	Gm37354
ENSMUSG00000087519	6.36866	1.49754	0.784617	-1.90862	0.0563106	0.190163	AV039307
ENSMUSG00000097197	168.371	1.49468	0.392287	-3.81017	0.000138871	0.00199937	9530027J09Rik
ENSMUSG00000043421	187.787	1.49396	0.387208	-3.85828	0.000114189	0.0017006	Hilpda
ENSMUSG00000105889	21.2219	1.49181	0.695423	-2.14518	0.0319385	0.12886	Gm42776
ENSMUSG00000078922	1406.9	1.49146	0.297426	-5.01455	5.31578e-07	1.84662e-05	Tgtp1
ENSMUSG00000028019	70.3657	1.49114	0.528199	-2.82307	0.00475665	0.0326731	Pdgfc
ENSMUSG00000061132	461.015	1.48987	0.348014	-4.28106	1.86006e-05	0.000379551	Blnk
ENSMUSG00000081223	17.128	1.4893	0.694832	-2.14339	0.0320815	0.129368	Gm12247
ENSMUSG00000108808	6.25337	1.48075	0.784659	-1.88712	0.059144	0.196619	RP23-325D10.5
ENSMUSG00000097754	38.8784	1.48014	0.569203	-2.60038	0.00931205	0.0540177	Ptgs2os2
ENSMUSG00000074865	21.4314	1.47907	0.651396	-2.27061	0.0231707	0.10328	Zfp934
ENSMUSG00000098320	8.47026	1.47788	0.775658	-1.90533	0.0567372	0.191228	Vis1
ENSMUSG00000019558	30.0467	1.47731	0.628261	-2.35143	0.0187013	0.0892128	Slc6a8
ENSMUSG00000048120	7202.52	1.47698	0.304856	-4.84485	1.26709e-06	3.87114e-05	Entpd1
ENSMUSG00000055110	51.03	1.47667	0.516618	-2.85833	0.00425873	0.0300292	A630012P03Rik
ENSMUSG00000061577	1701.89	1.47624	0.345596	-4.27157	1.94099e-05	0.000388865	Adgrg5
ENSMUSG00000021213	156.434	1.47537	0.480128	-3.07286	0.00212016	0.0174881	Akr1c13
ENSMUSG00000027611	136.786	1.47537	0.415603	-3.54994	0.000385319	0.00460256	Procr
ENSMUSG00000097855	52.1678	1.475	0.526159	-2.80333	0.00505773	0.0340394	A930007I19Rik
ENSMUSG00000060802	79605	1.47178	0.321049	-4.58428	4.55564e-06	0.000115771	B2m
ENSMUSG00000079038	16.8248	1.47122	0.699536	-2.10313	0.0354544	0.138258	D130040H23Rik
ENSMUSG00000092528	330.711	1.47031	0.415292	-3.54041	0.000399504	0.00474208	Nlrp1c-ps
ENSMUSG00000042182	60.918	1.46934	0.505376	-2.90741	0.00364431	0.0266779	Bend6
ENSMUSG00000070737	400.377	1.46865	0.326145	-4.50305	6.69852e-06	0.000160954	Gm12942
ENSMUSG00000102243	20.3029	1.468	0.702522	-2.08962	0.0366521	0.141609	Gm37718
ENSMUSG00000038332	1403.37	1.46625	0.349658	-4.19339	2.74818e-05	0.00051965	Sesn1
ENSMUSG00000010095	8074.9	1.46618	0.292963	-5.00466	5.59607e-07	1.91328e-05	Slc3a2
ENSMUSG00000028494	12628.4	1.46618	0.308271	-4.75614	1.97334e-06	5.72572e-05	Plin2
ENSMUSG00000021285	100.768	1.4637	0.455935	-3.21032	0.00132587	0.0122449	Ppp1r13b
ENSMUSG00000051232	742.049	1.46273	0.319496	-4.57823	4.68916e-06	0.00011837	Tmem199
ENSMUSG00000030323	146.085	1.46097	0.405465	-3.60319	0.00031433	0.00389953	Ift122
ENSMUSG00000031847	44.2734	1.45798	0.534019	-2.73021	0.00632944	0.0405741	1700030J22Rik
ENSMUSG00000046909	316.087	1.45536	0.343536	-4.23642	2.27112e-05	0.000441571	Tefm
ENSMUSG00000003420	3906.61	1.45438	0.32035	-4.53996	5.6264e-06	0.000138791	Fcgrt
ENSMUSG00000042505	43.992	1.45406	0.538788	-2.69876	0.00695991	0.0435239	Sdhaf3
ENSMUSG00000089994	5.41662	1.45404	0.773295	-1.88032	0.0600646	0.19885	Gm16239
ENSMUSG00000025810	3494.29	1.4536	0.319539	-4.54906	5.38868e-06	0.000133579	Nrp1
ENSMUSG00000052525	27.2544	1.45313	0.637005	-2.28119	0.0225371	0.10138	Spdya
ENSMUSG00000039410	25.1677	1.453	0.63638	-2.28322	0.0224173	0.100991	Prdm16
ENSMUSG00000038179	7034.61	1.45259	0.36255	-4.00659	6.16025e-05	0.00101416	Slamf7
ENSMUSG00000036743	18.9944	1.45209	0.704831	-2.06019	0.0393801	0.148445	Psma8
ENSMUSG00000026829	162.827	1.45134	0.400401	-3.62472	0.000289273	0.00363898	Gbgt1
ENSMUSG00000085315	38.4942	1.45076	0.561606	-2.58324	0.00978767	0.0561743	A430018G15Rik
ENSMUSG00000031681	199.882	1.45066	0.364653	-3.9782	6.94391e-05	0.00111176	Smad1
ENSMUSG00000041707	111.9	1.44989	0.420098	-3.45132	0.000557857	0.0061539	1810011H11Rik
ENSMUSG00000058672	810.235	1.44983	0.307981	-4.70753	2.50732e-06	6.98086e-05	Tubb2a
ENSMUSG00000059412	15.7795	1.44757	0.760799	-1.90269	0.0570809	0.191908	Fxyd2
ENSMUSG00000045757	128.283	1.443	0.4129	-3.49478	0.000474449	0.00541114	Zfp764
ENSMUSG00000102418	851.407	1.44057	0.305804	-4.71075	2.46808e-06	6.89695e-05	Sh2d1b1
ENSMUSG00000028108	9323.67	1.43981	0.309064	-4.65859	3.18377e-06	8.67292e-05	Ecm1
ENSMUSG00000040613	8699.16	1.43589	0.299214	-4.79888	1.59552e-06	4.71989e-05	Apobec1
ENSMUSG00000054072	8890.47	1.43413	0.333768	-4.29677	1.73304e-05	0.0003581	Iigp1
ENSMUSG00000033192	7222.59	1.43372	0.331741	-4.32179	1.54771e-05	0.000326485	Lpcat2
ENSMUSG00000040105	16.7535	1.43364	0.731156	-1.96078	0.0499046	0.175048	Plpp6
ENSMUSG00000022722	78.2768	1.43331	0.469504	-3.05282	0.00226703	0.0184011	Arl6
ENSMUSG00000031504	1305.29	1.43073	0.343134	-4.16961	3.05119e-05	0.000566339	Rab20
ENSMUSG00000024013	5185.45	1.42802	0.328288	-4.3499	1.36197e-05	0.000294692	Fgd2
ENSMUSG00000036896	24065.5	1.42672	0.328561	-4.34232	1.40985e-05	0.000302629	C1qc
ENSMUSG00000073805	27.6001	1.4263	0.676232	-2.10919	0.034928	0.13691	Fam196a
ENSMUSG00000032010	224.044	1.42522	0.364858	-3.90622	9.37507e-05	0.00144304	Usp2
ENSMUSG00000030424	14.4904	1.42463	0.749333	-1.9012	0.0572754	0.192306	Zfp939
ENSMUSG00000040213	58.2443	1.42357	0.504723	-2.8205	0.0047949	0.0328461	Ccbl2
ENSMUSG00000089929	197.045	1.42055	0.365272	-3.88902	0.00010065	0.00153056	Bcl2a1b
ENSMUSG00000092260	36.2807	1.41896	0.589299	-2.40787	0.0160458	0.0800221	Zfp963
ENSMUSG00000077714	15.9451	1.4171	0.730386	-1.9402	0.0523551	0.180508	Snord17
ENSMUSG00000107928	6.06889	1.41385	0.785607	-1.7997	0.0719087	0.223045	RP23-4F16.12
ENSMUSG00000015243	1663.63	1.41181	0.364341	-3.87497	0.00010664	0.00160394	Abca1
ENSMUSG00000035601	186.463	1.40968	0.393255	-3.58465	0.000337535	0.00412981	Trmt10b
ENSMUSG00000015314	582.81	1.40948	0.323261	-4.36018	1.29955e-05	0.000284848	Slamf6
ENSMUSG00000018809	110.948	1.40903	0.419529	-3.35859	0.000783411	0.00811505	Smyd4
ENSMUSG00000026768	98.4499	1.40818	0.502653	-2.8015	0.00508652	0.0341946	Itga8
ENSMUSG00000029915	3379.76	1.40773	0.322216	-4.36889	1.24881e-05	0.00027532	Clec5a
ENSMUSG00000103735	98.9018	1.40694	0.451765	-3.11431	0.00184378	0.0157507	Gm38317
ENSMUSG00000030560	102507	1.40691	0.296057	-4.75215	2.01264e-06	5.81745e-05	Ctsc
ENSMUSG00000097857	26.2627	1.40628	0.645155	-2.17976	0.0292752	0.121616	Gm26603
ENSMUSG00000024049	103.725	1.40621	0.447105	-3.14514	0.00166008	0.0145338	Myom1
ENSMUSG00000028793	322.466	1.40577	0.369911	-3.8003	0.000144522	0.00206502	Rnf19b
ENSMUSG00000031907	438.966	1.40541	0.323258	-4.34763	1.37618e-05	0.000296919	Zfp90
ENSMUSG00000104082	14.5076	1.4036	0.72487	-1.93635	0.0528247	0.181589	Gm7115
ENSMUSG00000058427	161.218	1.40087	0.409677	-3.41945	0.000627484	0.00680793	Cxcl2
ENSMUSG00000054021	34.631	1.40036	0.621791	-2.25214	0.0243136	0.106862	Sirt5
ENSMUSG00000078762	54.8019	1.39908	0.511577	-2.73484	0.0062411	0.0401732	Haus5
ENSMUSG00000056216	300.893	1.39705	0.34998	-3.99179	6.55762e-05	0.00107028	Cebpg
ENSMUSG00000100060	81.0696	1.39594	0.478718	-2.91599	0.0035456	0.0261202	Gm17944
ENSMUSG00000038894	104.403	1.39575	0.427352	-3.26603	0.00109065	0.0105272	Irs2
ENSMUSG00000105787	32.352	1.39506	0.598377	-2.33141	0.0197319	0.0926306	Gm8099
ENSMUSG00000029012	303.163	1.39245	0.345876	-4.02586	5.67682e-05	0.000946178	Orc5
ENSMUSG00000084583	7.87766	1.39196	0.77769	-1.78986	0.0734756	0.226144	Gm25177
ENSMUSG00000029209	352.773	1.39179	0.424238	-3.28068	0.00103556	0.0100736	Gnpda2
ENSMUSG00000050014	9.56537	1.3916	0.75729	-1.8376	0.0661207	0.21195	Apol10b
ENSMUSG00000029470	8615.28	1.3914	0.319679	-4.35247	1.34612e-05	0.000292515	P2rx4
ENSMUSG00000052914	9.79713	1.39079	0.760659	-1.8284	0.0674895	0.214837	Cyp2j6
ENSMUSG00000089942	805.872	1.38841	0.370855	-3.7438	0.00018126	0.00246442	Pira2
ENSMUSG00000022022	155.36	1.38672	0.395079	-3.50997	0.000448155	0.00520933	Mtrf1
ENSMUSG00000079020	161.491	1.38564	0.391558	-3.53878	0.000401974	0.0047602	Slc45a4
ENSMUSG00000033207	15.0945	1.38516	0.741917	-1.86701	0.0619009	0.203012	Mamdc2
ENSMUSG00000000440	416.614	1.38302	0.349106	-3.96159	7.44513e-05	0.00118574	Pparg
ENSMUSG00000001348	6836.57	1.38257	0.294898	-4.6883	2.75485e-06	7.58635e-05	Acp5
ENSMUSG00000079625	19.0658	1.3823	0.699287	-1.97672	0.0480727	0.170714	Tm4sf19
ENSMUSG00000026749	1081.31	1.3821	0.316319	-4.36933	1.24631e-05	0.000275169	Nek6
ENSMUSG00000108402	891.8	1.38199	0.341753	-4.04383	5.25843e-05	0.000887894	RP23-325D10.4
ENSMUSG00000090231	445.796	1.38154	0.361811	-3.81841	0.000134315	0.00194302	Cfb
ENSMUSG00000029925	979.263	1.38153	0.307018	-4.49984	6.80037e-06	0.000162458	Tbxas1
ENSMUSG00000005054	2544.15	1.38117	0.322039	-4.28883	1.79619e-05	0.000368632	Cstb
ENSMUSG00000056220	1858.53	1.38021	0.299712	-4.60512	4.12227e-06	0.000108021	Pla2g4a
ENSMUSG00000044340	204.806	1.37991	0.40741	-3.38703	0.000706541	0.00747818	Phlpp1
ENSMUSG00000096968	51.2003	1.37867	0.523357	-2.63428	0.00843155	0.0501764	Gm26620
ENSMUSG00000056671	43.5491	1.37794	0.548565	-2.5119	0.0120084	0.0651196	Prelid2
ENSMUSG00000097328	78.1253	1.37789	0.461553	-2.98534	0.00283264	0.0219454	Tnfsf12
ENSMUSG00000040026	1075.05	1.37756	0.448567	-3.07103	0.00213322	0.0175311	Saa3
ENSMUSG00000044350	907.053	1.37718	0.384385	-3.5828	0.000339928	0.00415541	Lacc1
ENSMUSG00000024084	194.201	1.37657	0.435021	-3.16439	0.0015541	0.0139116	Qpct
ENSMUSG00000049904	19.3564	1.37598	0.695535	-1.97831	0.0478939	0.170287	Tmem17
ENSMUSG00000085048	35.0598	1.37554	0.571244	-2.40797	0.0160415	0.0800221	Gm15537
ENSMUSG00000072620	266.681	1.37498	0.354177	-3.88218	0.000103523	0.00156953	Slfn2
ENSMUSG00000045625	128.345	1.3747	0.423183	-3.24847	0.00116027	0.011004	Pigz
ENSMUSG00000074785	378.639	1.37099	0.373495	-3.6707	0.00024189	0.00311007	Plxnc1
ENSMUSG00000081732	22.7547	1.36684	0.647159	-2.11206	0.0346813	0.13619	Gm15495
ENSMUSG00000059498	27377.5	1.36408	0.293323	-4.65046	3.31199e-06	8.97377e-05	Fcgr3
ENSMUSG00000040229	481.66	1.36103	0.421793	-3.22677	0.00125197	0.0116899	Gpr34
ENSMUSG00000072066	49.2106	1.36038	0.5271	-2.58088	0.00985492	0.0564106	6720489N17Rik
ENSMUSG00000024124	88.8427	1.35688	0.455215	-2.98074	0.00287551	0.0222206	Prss30
ENSMUSG00000026632	116.592	1.35676	0.466123	-2.91073	0.00360585	0.0264667	Tatdn3
ENSMUSG00000097081	65.3187	1.35568	0.47773	-2.83776	0.0045432	0.0315648	Gm10425
ENSMUSG00000108120	57.9927	1.35558	0.599619	-2.26073	0.0237758	0.104959	9930120I10Rik
ENSMUSG00000104060	176.702	1.35457	0.427476	-3.16876	0.00153093	0.0137285	Gm37954
ENSMUSG00000021876	1030.86	1.35446	0.336431	-4.02598	5.67391e-05	0.000946178	Rnase4
ENSMUSG00000013584	16.1042	1.35091	0.714372	-1.89104	0.0586184	0.195444	Aldh1a2
ENSMUSG00000042705	785.637	1.35035	0.317205	-4.25705	2.07145e-05	0.000409305	Commd10
ENSMUSG00000035852	40.7604	1.34707	0.549859	-2.44985	0.0142915	0.073407	Misp
ENSMUSG00000030322	273.384	1.34683	0.383638	-3.51068	0.000446964	0.00520041	Mbd4
ENSMUSG00000028232	922.668	1.34633	0.332384	-4.05051	5.11053e-05	0.000867758	Tmem68
ENSMUSG00000074826	24.3283	1.3461	0.633186	-2.12591	0.0335109	0.133427	Gm10767
ENSMUSG00000004814	15.2569	1.34436	0.727731	-1.84733	0.0646987	0.209029	Ccl24
ENSMUSG00000107429	17.9808	1.34403	0.676048	-1.98806	0.0468045	0.167589	Gm44206
ENSMUSG00000049422	84.0935	1.34369	0.48381	-2.77731	0.00548103	0.0363307	Chchd10
ENSMUSG00000043157	695.702	1.34305	0.346364	-3.87756	0.000105511	0.00159328	Arl11
ENSMUSG00000105936	14.4855	1.34286	0.706036	-1.90196	0.0571759	0.19207	Gm43544
ENSMUSG00000037706	3478.76	1.34165	0.289186	-4.6394	3.49417e-06	9.41684e-05	Cd81
ENSMUSG00000086717	55.0262	1.33863	0.503293	-2.65975	0.00781987	0.0473002	Gm15655
ENSMUSG00000020707	558.529	1.33786	0.322088	-4.15373	3.271e-05	0.00059979	Rnf135
ENSMUSG00000017754	9750.04	1.33781	0.290735	-4.60148	4.19501e-06	0.000109359	Pltp
ENSMUSG00000078956	6.59912	1.33761	0.78381	-1.70655	0.0879056	0.253289	Gm14221
ENSMUSG00000025645	118.009	1.33584	0.425778	-3.13741	0.00170448	0.0148113	Ccdc51
ENSMUSG00000029380	6.2522	1.33555	0.785433	-1.7004	0.0890559	0.255172	Cxcl1
ENSMUSG00000031138	10.8737	1.33115	0.742322	-1.79323	0.0729369	0.224899	F9
ENSMUSG00000006241	10.4899	1.33016	0.759794	-1.75069	0.0800002	0.238896	Ccdc159
ENSMUSG00000017466	169.537	1.32825	0.489165	-2.71533	0.00662091	0.0420639	Timp2
ENSMUSG00000025804	7401.81	1.32765	0.291292	-4.55779	5.16946e-06	0.00012899	Ccr1
ENSMUSG00000038383	570.115	1.32651	0.345657	-3.83766	0.000124211	0.00181997	Pigu
ENSMUSG00000020865	1585.79	1.32558	0.34256	-3.86961	0.000109008	0.00162984	Abcc3
ENSMUSG00000063506	620.7	1.32481	0.332112	-3.98903	6.63431e-05	0.00107964	Arhgap22
ENSMUSG00000032400	31.6888	1.32386	0.58975	-2.24478	0.0247824	0.108265	Zwilch
ENSMUSG00000025271	28.3733	1.32075	0.627165	-2.1059	0.0352131	0.137707	Pfkfb1
ENSMUSG00000035142	72.0418	1.32072	0.498581	-2.64895	0.00807422	0.0485479	Nubpl
ENSMUSG00000082100	185.977	1.31808	0.377354	-3.49295	0.000477713	0.00544018	Glns-ps1
ENSMUSG00000097258	22.2819	1.31805	0.665289	-1.98117	0.047572	0.169456	Gm26767
ENSMUSG00000079671	5.59158	1.31632	0.786116	-1.67445	0.0940415	0.264997	2610203C22Rik
ENSMUSG00000086843	16.8337	1.31507	0.685524	-1.91834	0.0550685	0.187136	E030013I19Rik
ENSMUSG00000028249	21429.8	1.31439	0.302319	-4.3477	1.37573e-05	0.000296919	Sdcbp
ENSMUSG00000096957	264.831	1.31422	0.372102	-3.53188	0.000412619	0.00486048	E230013L22Rik
ENSMUSG00000026627	751.635	1.31348	0.310096	-4.23572	2.27819e-05	0.000441811	Tmem206
ENSMUSG00000057137	861.432	1.31298	0.312216	-4.20534	2.60689e-05	0.000496014	Tmem140
ENSMUSG00000081723	853.191	1.31246	0.374844	-3.50135	0.000462908	0.00532362	Gm15931
ENSMUSG00000069835	9.03268	1.31144	0.763185	-1.71838	0.0857278	0.249891	Sat2
ENSMUSG00000086637	8.51742	1.31072	0.775232	-1.69075	0.0908847	0.258991	Gm14040
ENSMUSG00000004394	1622.6	1.30933	0.300851	-4.35208	1.34851e-05	0.000292615	Tmed4
ENSMUSG00000022751	341.489	1.30881	0.341094	-3.83711	0.000124493	0.0018218	Nit2
ENSMUSG00000062861	91.8178	1.30836	0.465039	-2.81345	0.0049013	0.0333084	Zfp28
ENSMUSG00000070331	4.94371	1.30587	0.781085	-1.67186	0.0945513	0.265988	Qrich2
ENSMUSG00000075511	9.9261	1.30557	0.755984	-1.72698	0.0841704	0.247183	1700001L05Rik
ENSMUSG00000098588	8.62701	1.30236	0.776307	-1.67763	0.0934184	0.263829	Mir6340
ENSMUSG00000024781	6244.64	1.30209	0.305117	-4.26753	1.97653e-05	0.000395264	Lipa
ENSMUSG00000042707	8.81032	1.30147	0.779868	-1.66883	0.0951501	0.267105	Dnali1
ENSMUSG00000061758	452.425	1.30147	0.328459	-3.96236	7.42133e-05	0.00118319	Akr1b10
ENSMUSG00000029534	191.885	1.30089	0.426175	-3.05248	0.00226957	0.0184118	St7
ENSMUSG00000047407	2177.49	1.30075	0.313725	-4.14616	3.38103e-05	0.000614018	Tgif1
ENSMUSG00000025993	816.792	1.29909	0.525683	-2.47124	0.0134647	0.0703472	Slc40a1
ENSMUSG00000025962	341.191	1.29843	0.370575	-3.50382	0.000458643	0.0052826	Fastkd2
ENSMUSG00000021591	3499.31	1.29764	0.288303	-4.50096	6.76467e-06	0.000161861	Glrx
ENSMUSG00000020116	873.376	1.29703	0.325598	-3.98353	6.79003e-05	0.00109196	Pno1
ENSMUSG00000095788	2815.93	1.29613	0.309542	-4.18724	2.82371e-05	0.000531763	Sirpb1a
ENSMUSG00000037370	174.547	1.29556	0.386589	-3.35126	0.000804441	0.00827722	Enpp1
ENSMUSG00000057054	6.41464	1.29489	0.784379	-1.65084	0.0987704	0.273101	Inca1
ENSMUSG00000108732	10.8414	1.29451	0.753787	-1.71734	0.0859169	0.250201	RP24-67F19.6
ENSMUSG00000090173	52.9637	1.29426	0.510167	-2.53694	0.0111825	0.0617469	Fbxw10
ENSMUSG00000089827	60.3555	1.29352	0.538994	-2.39987	0.0164008	0.0813113	1700023H06Rik
ENSMUSG00000080832	826.32	1.2928	0.324354	-3.98577	6.72623e-05	0.00108619	M6pr-ps
ENSMUSG00000068606	127.814	1.29249	0.400443	-3.22763	0.00124818	0.0116829	Gm4841
ENSMUSG00000001930	45.9259	1.2902	0.577856	-2.23274	0.0255659	0.110288	Vwf
ENSMUSG00000090110	35.2797	1.28961	0.586633	-2.19832	0.0279263	0.117623	Cmc4
ENSMUSG00000009941	9.76471	1.28859	0.755425	-1.70578	0.0880492	0.253294	Nxf2
ENSMUSG00000025790	278.042	1.28619	0.37108	-3.46607	0.000528127	0.00589463	Slco3a1
ENSMUSG00000022901	6750.03	1.28421	0.312512	-4.10932	3.96819e-05	0.000702573	Cd86
ENSMUSG00000020309	89.3045	1.284	0.444057	-2.89152	0.00383379	0.0278097	Chac2
ENSMUSG00000028015	1328.28	1.284	0.32823	-3.91188	9.15801e-05	0.00141538	Ctso
ENSMUSG00000074158	5.40487	1.28372	0.776557	-1.65309	0.0983133	0.272471	9830147E19Rik
ENSMUSG00000082120	382.414	1.28342	0.341403	-3.75926	0.00017042	0.00235378	Gm15720
ENSMUSG00000028573	147.415	1.28272	0.41403	-3.09812	0.0019475	0.0163919	Fggy
ENSMUSG00000030051	113.753	1.28229	0.411486	-3.11625	0.00183165	0.0156913	Aplf
ENSMUSG00000031802	16.8464	1.28122	0.708115	-1.80934	0.0703987	0.220029	Phxr4
ENSMUSG00000000958	1770.07	1.28074	0.31238	-4.09995	4.13245e-05	0.000726946	Slc7a7
ENSMUSG00000026154	453.336	1.2807	0.352869	-3.62939	0.000284092	0.00358272	Sdhaf4
ENSMUSG00000036905	72328	1.27998	0.406331	-3.15009	0.00163222	0.014348	C1qb
ENSMUSG00000025779	329.924	1.27884	0.367367	-3.4811	0.000499355	0.00562874	Ly96
ENSMUSG00000022108	76437.3	1.27837	0.291013	-4.39282	1.11889e-05	0.000249913	Itm2b
ENSMUSG00000041920	803.033	1.278	0.306997	-4.16292	3.14207e-05	0.000578951	Slc16a6
ENSMUSG00000060181	29.0211	1.27765	0.604997	-2.11184	0.0347006	0.13623	Slc35e3
ENSMUSG00000021638	6.40084	1.27636	0.784304	-1.62738	0.103656	0.281205	Ocln
ENSMUSG00000062545	422.207	1.27539	0.405172	-3.14777	0.00164521	0.0144404	Tlr12
ENSMUSG00000079445	13.9989	1.27483	0.718642	-1.77394	0.0760735	0.230833	B3gnt7
ENSMUSG00000031570	279.584	1.27401	0.375443	-3.39336	0.000690405	0.00733136	Plpp5
ENSMUSG00000096971	6.75482	1.2736	0.785889	-1.62059	0.105106	0.283817	4930556M19Rik
ENSMUSG00000030486	12.5407	1.27279	0.768357	-1.65651	0.0976192	0.271591	Zfp108
ENSMUSG00000073409	1554.62	1.27148	0.326495	-3.89433	9.84714e-05	0.00150804	H2-Q6
ENSMUSG00000053181	8.67429	1.27089	0.778626	-1.63222	0.102632	0.279782	A830005F24Rik
ENSMUSG00000055305	17.9889	1.27072	0.71077	-1.78781	0.0738065	0.226749	Zfp93
ENSMUSG00000025257	13.8848	1.27007	0.712738	-1.78195	0.0747567	0.228602	Ribc1
ENSMUSG00000033880	19309.7	1.26971	0.285274	-4.45083	8.55398e-06	0.000199628	Lgals3bp
ENSMUSG00000030064	1869.37	1.26877	0.347282	-3.65342	0.00025877	0.0032991	Frmd4b
ENSMUSG00000036764	182.074	1.26807	0.451663	-2.80755	0.00499196	0.0337688	Dnajc12
ENSMUSG00000024078	97.7141	1.26616	0.438749	-2.88583	0.0039038	0.0282094	Ttc27
ENSMUSG00000030041	125.683	1.2648	0.410853	-3.07848	0.00208059	0.0172482	M1ap
ENSMUSG00000008129	10.1141	1.26055	0.763467	-1.65109	0.09872	0.273067	4930432K21Rik
ENSMUSG00000050270	54.3146	1.25971	0.540652	-2.32998	0.0198073	0.0928625	Tmem220
ENSMUSG00000036887	35115.6	1.25922	0.413253	-3.0471	0.0023106	0.0186349	C1qa
ENSMUSG00000049037	10742.3	1.25895	0.289337	-4.35115	1.35427e-05	0.000293444	Clec4a1
ENSMUSG00000099760	12.2455	1.25867	0.732518	-1.71828	0.0857448	0.249892	Gm28800
ENSMUSG00000022323	115.236	1.25727	0.419181	-2.99936	0.00270547	0.0212316	Hrsp12
ENSMUSG00000048779	4314.56	1.2572	0.303968	-4.13598	3.5344e-05	0.000635019	P2ry6
ENSMUSG00000057234	47.2227	1.25685	0.527866	-2.381	0.0172655	0.0842472	Mettl15
ENSMUSG00000015305	127.657	1.2555	0.417104	-3.01005	0.00261203	0.0206442	Sash1
ENSMUSG00000026134	203.621	1.25487	0.394078	-3.18432	0.00145093	0.0131592	Prim2
ENSMUSG00000005968	110.792	1.2546	0.419025	-2.9941	0.00275257	0.0215121	Tuft1
ENSMUSG00000026321	179.138	1.25451	0.380837	-3.29409	0.000987402	0.00971747	Tnfrsf11a
ENSMUSG00000004798	145.591	1.25432	0.400913	-3.12865	0.00175612	0.0152075	Ulk2
ENSMUSG00000102813	17.9911	1.25401	0.72636	-1.72643	0.08427	0.247355	Gm37795
ENSMUSG00000006717	498.329	1.25346	0.323726	-3.87197	0.000107959	0.00161735	Acot13
ENSMUSG00000029082	1072.68	1.25312	0.297813	-4.20773	2.57947e-05	0.000493291	Bst1
ENSMUSG00000107961	329.058	1.25284	0.380981	-3.28844	0.00100743	0.00985125	Gm44036
ENSMUSG00000091996	138.559	1.25265	0.411508	-3.04406	0.0023341	0.0187844	BC049352
ENSMUSG00000035367	308.614	1.2507	0.365787	-3.41922	0.000628015	0.00680881	Rmi1
ENSMUSG00000029994	4722.68	1.2491	0.31041	-4.02404	5.72093e-05	0.000952189	Anxa4
ENSMUSG00000074579	15.2935	1.24893	0.696698	-1.79264	0.0730304	0.225095	Lekr1
ENSMUSG00000044788	17.9933	1.24888	0.692129	-1.80441	0.0711676	0.221427	Fads6
ENSMUSG00000021013	52.696	1.24885	0.531582	-2.34932	0.0188079	0.0894997	Ttc8
ENSMUSG00000105929	14.5142	1.24879	0.711358	-1.7555	0.0791746	0.237461	Gm43693
ENSMUSG00000026131	451.62	1.24867	0.320361	-3.8977	9.7109e-05	0.00148868	Dst
ENSMUSG00000040751	5178.39	1.24422	0.290648	-4.28084	1.86192e-05	0.000379551	Lat2
ENSMUSG00000021023	182.594	1.24336	0.374404	-3.3209	0.000897278	0.00901205	1110008L16Rik
ENSMUSG00000053063	3842.93	1.24327	0.322323	-3.85722	0.000114684	0.00170461	Clec12a
ENSMUSG00000001018	1485.54	1.24325	0.326382	-3.80918	0.00013943	0.00200551	Snapin
ENSMUSG00000033488	129.641	1.24193	0.404003	-3.07406	0.00211168	0.0174392	BC026585
ENSMUSG00000036381	1255.57	1.24145	0.359619	-3.45213	0.000556175	0.00613981	P2ry14
ENSMUSG00000022817	868.846	1.24053	0.30687	-4.04253	5.28775e-05	0.00089086	Itgb5
ENSMUSG00000068134	665.666	1.2401	0.312575	-3.96739	7.26645e-05	0.00116095	Zfp120
ENSMUSG00000015839	5538.38	1.23981	0.288053	-4.30411	1.67662e-05	0.000347435	Nfe2l2
ENSMUSG00000072663	22.902	1.23964	0.648008	-1.91301	0.0557471	0.188891	Spef2
ENSMUSG00000032718	131.084	1.2396	0.437154	-2.83562	0.00457366	0.0317328	Mansc1
ENSMUSG00000074867	18.1479	1.23942	0.701656	-1.76642	0.0773256	0.233255	Zfp808
ENSMUSG00000040978	13.8052	1.23848	0.728874	-1.69916	0.0892885	0.255694	Gm11992
ENSMUSG00000085687	46.4306	1.23836	0.566845	-2.18465	0.0289147	0.12053	Gm16153
ENSMUSG00000031214	487.048	1.23827	0.326916	-3.78772	0.000152035	0.00215408	Ophn1
ENSMUSG00000030894	4743.82	1.23753	0.290016	-4.26712	1.98012e-05	0.000395264	Tpp1
ENSMUSG00000019088	1250.45	1.23713	0.325891	-3.79613	0.00014697	0.00209211	Dnase1l1
ENSMUSG00000022106	1154.35	1.23708	0.305578	-4.04831	5.1588e-05	0.000873236	Rcbtb2
ENSMUSG00000041390	491.333	1.2368	0.396278	-3.12103	0.00180218	0.0154826	Mdfic
ENSMUSG00000097571	23.6213	1.23643	0.653032	-1.89336	0.0583097	0.194872	Jpx
ENSMUSG00000029014	728.373	1.23558	0.309587	-3.99104	6.57835e-05	0.0010725	Dnajc2
ENSMUSG00000046806	987.296	1.23515	0.303533	-4.06924	4.71658e-05	0.000807201	3110062M04Rik
ENSMUSG00000020526	198.539	1.23488	0.392972	-3.14242	0.00167559	0.0146105	Znhit3
ENSMUSG00000026956	2371.47	1.23454	0.340558	-3.62506	0.000288891	0.00363719	Uap1l1
ENSMUSG00000021665	7305.93	1.23384	0.313637	-3.93399	8.35485e-05	0.00131678	Hexb
ENSMUSG00000098506	73.1097	1.23339	0.472336	-2.61125	0.00902131	0.0526742	Phf20-ps
ENSMUSG00000091989	121.367	1.23221	0.416321	-2.95975	0.00307887	0.023363	Gm17257
ENSMUSG00000062328	7.17897	1.23105	0.781781	-1.57468	0.115331	0.301136	Rpl17
ENSMUSG00000036975	102.934	1.23008	0.437722	-2.81019	0.00495119	0.0335679	Tmem177
ENSMUSG00000038116	692.672	1.22984	0.315836	-3.89393	9.86334e-05	0.00150899	Phf20
ENSMUSG00000007458	8384.76	1.2296	0.308854	-3.98118	6.85745e-05	0.00109908	M6pr
ENSMUSG00000104378	95.6377	1.22939	0.534432	-2.30037	0.0214272	0.097988	Gm37510
ENSMUSG00000025534	7138.44	1.22937	0.320646	-3.83404	0.000126053	0.00184108	Gusb
ENSMUSG00000039891	25.0104	1.22898	0.626758	-1.96085	0.0498967	0.175048	Txlnb
ENSMUSG00000050994	57.1922	1.22716	0.526405	-2.33122	0.019742	0.0926306	Adgb
ENSMUSG00000087606	59.027	1.22706	0.496194	-2.47294	0.0134006	0.07019	Gm16121
ENSMUSG00000050714	25.3713	1.22687	0.649139	-1.88999	0.0587589	0.195768	Zbtb26
ENSMUSG00000047766	92.3647	1.22677	0.490677	-2.50016	0.0124137	0.0665314	Lrrc49
ENSMUSG00000048581	95.2479	1.22637	0.451849	-2.71412	0.00664524	0.0421831	E130311K13Rik
ENSMUSG00000020650	1050.71	1.22622	0.331568	-3.69825	0.000217091	0.00283706	Bcap29
ENSMUSG00000049491	19.1094	1.22554	0.689034	-1.77864	0.0752994	0.229428	Slc36a3
ENSMUSG00000071035	520.613	1.22505	0.316248	-3.8737	0.000107197	0.00160913	Gm5499
ENSMUSG00000044950	40.8592	1.2243	0.568222	-2.15462	0.0311915	0.126588	Pwwp2a
ENSMUSG00000107951	6.84691	1.22414	0.779811	-1.56979	0.116464	0.302878	Gm6210
ENSMUSG00000066829	157.212	1.22342	0.40736	-3.00329	0.00267076	0.0210356	Zfp810
ENSMUSG00000060044	328.452	1.22333	0.3697	-3.30899	0.000936316	0.00929931	Tmem26
ENSMUSG00000084918	26.5367	1.22273	0.61096	-2.00132	0.0453575	0.164315	Gm12708
ENSMUSG00000075054	81.8086	1.22219	0.472341	-2.58753	0.0096668	0.0556493	Yae1d1
ENSMUSG00000027624	109.751	1.22169	0.463315	-2.63684	0.00836828	0.0499	Epb41l1
ENSMUSG00000028629	170.432	1.22097	0.379075	-3.22093	0.00127777	0.0118708	Exo5
ENSMUSG00000044595	25.7069	1.22084	0.65487	-1.86425	0.0622861	0.203755	Dnd1
ENSMUSG00000091639	71.0357	1.22076	0.463289	-2.63499	0.00841399	0.0501134	Gm3756
ENSMUSG00000059277	527.737	1.21975	0.318216	-3.83309	0.000126545	0.00184502	R74862
ENSMUSG00000080772	100.762	1.21876	0.428272	-2.84576	0.00443054	0.0309497	Gm12543
ENSMUSG00000078771	7818.5	1.2187	0.297524	-4.09614	4.2009e-05	0.000735846	Evi2a
ENSMUSG00000035234	136.281	1.21839	0.424743	-2.86853	0.00412383	0.0293237	Fam175a
ENSMUSG00000052102	3113.48	1.21817	0.323316	-3.76776	0.000164721	0.00229537	Gnpda1
ENSMUSG00000070960	202.76	1.21805	0.402006	-3.02994	0.00244602	0.0195089	Gm19680
ENSMUSG00000051444	44.9837	1.2178	0.530388	-2.29606	0.0216725	0.0987259	Bbs12
ENSMUSG00000027018	1162.56	1.21758	0.303448	-4.01249	6.00804e-05	0.000992342	Hat1
ENSMUSG00000086109	15.5656	1.21648	0.714716	-1.70205	0.0887456	0.254668	Gm13391
ENSMUSG00000034121	169.187	1.2164	0.419668	-2.89847	0.00374985	0.0273317	Mks1
ENSMUSG00000032401	6.21519	1.21639	0.785695	-1.54817	0.121581	0.309856	Lctl
ENSMUSG00000099974	777.75	1.21494	0.309089	-3.93071	8.46943e-05	0.00132519	Bcl2a1d
ENSMUSG00000021684	62.656	1.21444	0.481612	-2.52161	0.0116819	0.0637831	Pde8b
ENSMUSG00000024661	83255.6	1.21345	0.364611	-3.32807	0.000874487	0.00882411	Fth1
ENSMUSG00000034947	6778.12	1.21345	0.287624	-4.21886	2.45537e-05	0.000471344	Tmem106a
ENSMUSG00000072762	63.2787	1.21294	0.493464	-2.45801	0.0139708	0.0722683	4930522L14Rik
ENSMUSG00000038593	1296.43	1.2123	0.340635	-3.55895	0.000372337	0.00446157	Tctn1
ENSMUSG00000024866	9.10538	1.21227	0.774749	-1.56473	0.117646	0.304319	Acy3
ENSMUSG00000029291	162.358	1.2108	0.390111	-3.10373	0.00191098	0.0161607	Rufy3
ENSMUSG00000030789	1846.54	1.20993	0.336356	-3.59717	0.000321699	0.00397103	Itgax
ENSMUSG00000050538	29.8568	1.20893	0.604448	-2.00006	0.0454943	0.164707	B230217C12Rik
ENSMUSG00000018697	554.921	1.20825	0.358365	-3.37156	0.000747438	0.00782897	Aatf
ENSMUSG00000053007	781.694	1.20639	0.41908	-2.87866	0.00399364	0.0286672	Creb5
ENSMUSG00000073778	66.856	1.20579	0.499858	-2.41226	0.0158538	0.0793789	Faddos
ENSMUSG00000021884	155.302	1.20492	0.409682	-2.94111	0.00327038	0.0245093	Hacl1
ENSMUSG00000046463	43.3237	1.20362	0.540169	-2.22822	0.0258657	0.111201	5930403N24Rik
ENSMUSG00000093858	20.3934	1.20227	0.700047	-1.71742	0.0859026	0.250201	Gm19967
ENSMUSG00000079227	8511.55	1.20076	0.335954	-3.57419	0.00035131	0.00425242	Ccr5
ENSMUSG00000047747	58.1634	1.1989	0.501533	-2.39047	0.0168268	0.0828001	Rnf150
ENSMUSG00000036368	27.799	1.1988	0.605854	-1.97869	0.0478509	0.170287	Rmdn2
ENSMUSG00000108555	11.5664	1.19682	0.733301	-1.6321	0.102659	0.279804	RP23-137A24.3
ENSMUSG00000105402	5.36099	1.19635	0.785024	-1.52397	0.127516	0.319774	Gm3716
ENSMUSG00000029521	175.078	1.19548	0.455014	-2.62736	0.00860511	0.0508585	Chek2
ENSMUSG00000039110	6.06994	1.19512	0.785503	-1.52147	0.128142	0.320974	Mycbpap
ENSMUSG00000032750	512.374	1.19275	0.323623	-3.68562	0.000228145	0.00296354	Gab3
ENSMUSG00000023191	13.7985	1.19198	0.76543	-1.55726	0.119408	0.307054	P3h3
ENSMUSG00000010047	191.105	1.19111	0.378537	-3.14662	0.00165172	0.014469	Hyal2
ENSMUSG00000086589	11.9458	1.19052	0.742587	-1.60321	0.108888	0.290405	Gm12915
ENSMUSG00000001604	65.3441	1.18935	0.505529	-2.35268	0.0186385	0.0891094	Tcea3
ENSMUSG00000031903	2824.94	1.18908	0.331718	-3.58463	0.000337562	0.00412981	Pla2g15
ENSMUSG00000097261	6.46768	1.18822	0.785786	-1.51214	0.130498	0.325248	4930532G15Rik
ENSMUSG00000018217	117.503	1.18819	0.434497	-2.73464	0.00624493	0.0401808	Pmp22
ENSMUSG00000024799	103.982	1.18672	0.439069	-2.7028	0.00687574	0.0431758	Tm7sf2
ENSMUSG00000025086	98.5053	1.18521	0.456356	-2.59711	0.00940111	0.0544718	Trub1
ENSMUSG00000078546	157.816	1.18435	0.398161	-2.97456	0.0029341	0.0225583	2210404O09Rik
ENSMUSG00000047798	4739.42	1.18269	0.290272	-4.07441	4.61314e-05	0.000794888	Cd300lf
ENSMUSG00000020709	1951.79	1.18202	0.303926	-3.88916	0.000100593	0.00153056	Adap2
ENSMUSG00000058745	58.6003	1.18117	0.515487	-2.29136	0.0219427	0.0994746	Gm9174
ENSMUSG00000021276	199.434	1.18098	0.370013	-3.19173	0.00141422	0.012924	Cinp
ENSMUSG00000021639	389.884	1.17946	0.352565	-3.34536	0.000821767	0.00839844	Gtf2h2
ENSMUSG00000025702	107.518	1.17738	0.523258	-2.25008	0.0244436	0.107218	March8
ENSMUSG00000071568	44.2297	1.17684	0.543333	-2.16596	0.030314	0.124225	Gm5874
ENSMUSG00000044252	124.388	1.17678	0.419561	-2.80478	0.00503507	0.0339655	Osbpl1a
ENSMUSG00000027341	610.537	1.17587	0.337965	-3.47926	0.000502802	0.00564943	Tmem230
ENSMUSG00000063760	19.9047	1.17468	0.687521	-1.70858	0.0875291	0.253014	Rnf217
ENSMUSG00000061175	296.061	1.17443	0.400543	-2.93209	0.00336689	0.0250712	Fnip2
ENSMUSG00000044708	14.263	1.17359	0.754502	-1.55545	0.119838	0.307622	Kcnj10
ENSMUSG00000024150	1911.61	1.17308	0.302564	-3.87712	0.0001057	0.00159456	Mcfd2
ENSMUSG00000030942	1094.28	1.17305	0.305223	-3.84324	0.000121419	0.00179067	Thumpd1
ENSMUSG00000029587	35.2091	1.17183	0.619955	-1.89018	0.0587338	0.195728	Zfp12
ENSMUSG00000054598	6.12298	1.17007	0.786144	-1.48836	0.136656	0.335623	9130230L23Rik
ENSMUSG00000009092	12.6258	1.16789	0.749689	-1.55783	0.119273	0.30695	Derl3
ENSMUSG00000007659	1856.74	1.16696	0.289659	-4.02874	5.60773e-05	0.000938261	Bcl2l1
ENSMUSG00000044162	383.18	1.16693	0.369032	-3.16213	0.00156621	0.0139746	Tnip3
ENSMUSG00000064289	1546.31	1.16618	0.342503	-3.40487	0.000661955	0.00710558	Tank
ENSMUSG00000001665	89.5008	1.16535	0.454731	-2.56273	0.0103852	0.0585343	Gstt3
ENSMUSG00000059897	52.6761	1.16517	0.521808	-2.23295	0.0255521	0.110288	Zfp930
ENSMUSG00000003812	751.298	1.16477	0.335064	-3.47627	0.000508435	0.00570426	Dnase2a
ENSMUSG00000031169	33.5928	1.16362	0.591171	-1.96833	0.0490302	0.172901	Porcn
ENSMUSG00000003809	224.383	1.16359	0.360131	-3.23101	0.00123355	0.0115953	Gcdh
ENSMUSG00000024544	60.2824	1.16341	0.512297	-2.27097	0.0231486	0.103238	Ldlrad4
ENSMUSG00000031641	149.606	1.1632	0.387523	-3.00163	0.00268542	0.0211181	Cbr4
ENSMUSG00000039911	316.898	1.16304	0.393634	-2.95464	0.00313036	0.0236589	Spsb1
ENSMUSG00000061186	13.1584	1.16295	0.733842	-1.58474	0.113025	0.297407	Sfmbt2
ENSMUSG00000028223	222.229	1.1626	0.367768	-3.16122	0.00157108	0.0139892	Decr1
ENSMUSG00000023942	2419.19	1.161	0.293519	-3.95546	7.63866e-05	0.00121401	Slc29a1
ENSMUSG00000043832	8386.61	1.16018	0.295906	-3.92078	8.82645e-05	0.00137536	Clec4a3
ENSMUSG00000045312	124.885	1.15893	0.406969	-2.84772	0.00440337	0.030791	Lhfpl2
ENSMUSG00000028327	96.5985	1.15829	0.441282	-2.62482	0.00866953	0.05107	Stra6l
ENSMUSG00000067389	523.632	1.1579	0.32348	-3.5795	0.00034425	0.00418505	Gm17080
ENSMUSG00000001630	509.528	1.15708	0.324291	-3.56804	0.000359667	0.0043372	Stk38l
ENSMUSG00000097723	20.9501	1.15652	0.667042	-1.7338	0.0829533	0.244779	Gm26848
ENSMUSG00000024437	892.602	1.15638	0.363787	-3.17874	0.00147916	0.0133592	Gm8615
ENSMUSG00000014543	473.258	1.15589	0.415863	-2.77949	0.00544437	0.0361193	Klra17
ENSMUSG00000050762	7.27683	1.15516	0.77688	-1.48693	0.137035	0.33639	Prss27
ENSMUSG00000048261	76.8962	1.15484	0.466698	-2.47448	0.0133429	0.0699763	Gm4879
ENSMUSG00000029592	50.5122	1.15475	0.511184	-2.25898	0.0238848	0.105377	Usp30
ENSMUSG00000052821	1667.68	1.15394	0.312847	-3.6885	0.000225578	0.00293522	Cysltr1
ENSMUSG00000026659	250.95	1.1539	0.387648	-2.97666	0.00291406	0.022427	Dusp12
ENSMUSG00000024507	2179.66	1.15289	0.307598	-3.74804	0.000178221	0.00243183	Hsd17b4
ENSMUSG00000023882	106.865	1.15214	0.474952	-2.4258	0.0152749	0.0772297	Zfp54
ENSMUSG00000024592	183.753	1.15177	0.369693	-3.11547	0.00183655	0.0157155	C330018D20Rik
ENSMUSG00000049536	5.72173	1.15142	0.785896	-1.46511	0.142891	0.344513	Tceal1
ENSMUSG00000021185	1421.9	1.15109	0.316306	-3.63917	0.000273522	0.00346719	9030617O03Rik
ENSMUSG00000010609	1958.58	1.15102	0.298225	-3.85956	0.000113589	0.00169333	Psen2
ENSMUSG00000097868	6.89301	1.15034	0.784772	-1.46583	0.142696	0.344315	A330069E16Rik
ENSMUSG00000024055	733.315	1.14908	0.3677	-3.12504	0.00177778	0.0153339	Cyp4f13
ENSMUSG00000068966	54.9552	1.14864	0.511495	-2.24565	0.0247262	0.108082	Zbtb34
ENSMUSG00000031608	1030.58	1.14849	0.333259	-3.44623	0.000568463	0.00625723	Galnt7
ENSMUSG00000056383	324.749	1.14806	0.342861	-3.34847	0.00081258	0.00833266	AI987944
ENSMUSG00000047875	52.7764	1.14786	0.567741	-2.02181	0.0431959	0.15888	Gpr157
ENSMUSG00000003882	697.294	1.14778	0.324042	-3.54209	0.000396974	0.00471574	Il7r
ENSMUSG00000000278	7038.27	1.14763	0.29827	-3.8476	0.00011928	0.00176083	Scpep1
ENSMUSG00000097334	8.8331	1.14761	0.760984	-1.50806	0.131539	0.326658	2700012I20Rik
ENSMUSG00000097674	13.8316	1.14646	0.718873	-1.5948	0.110758	0.293738	Gm26610
ENSMUSG00000003038	1342.95	1.1457	0.310527	-3.68952	0.000224676	0.00292915	Hmgn2
ENSMUSG00000014980	56.7973	1.14509	0.50564	-2.26463	0.0235354	0.104352	Tsen15
ENSMUSG00000005413	2115.23	1.14477	0.296982	-3.8547	0.000115873	0.00171724	Hmox1
ENSMUSG00000052949	46.384	1.1446	0.528297	-2.16659	0.0302664	0.124164	Rnf157
ENSMUSG00000020300	74.8188	1.14335	0.487739	-2.34418	0.0190692	0.0902285	Cpeb4
ENSMUSG00000050900	306.777	1.14289	0.345014	-3.3126	0.000924345	0.00921061	Gm7327
ENSMUSG00000029557	89.2343	1.14285	0.447051	-2.55642	0.0105756	0.0592157	Ftsj2
ENSMUSG00000024645	299.032	1.14278	0.343348	-3.32835	0.00087361	0.00882113	Timm21
ENSMUSG00000022220	209.755	1.14164	0.388464	-2.93885	0.00329432	0.0246282	Adcy4
ENSMUSG00000034484	4796.78	1.14107	0.307573	-3.70991	0.000207331	0.00273777	Snx2
ENSMUSG00000001942	549.871	1.14042	0.316621	-3.60186	0.000315953	0.00391286	Siae
ENSMUSG00000019923	1076.07	1.14039	0.307227	-3.71187	0.000205732	0.00272379	Zwint
ENSMUSG00000099930	11.3796	1.14035	0.749167	-1.52216	0.12797	0.320687	Gm2396
ENSMUSG00000035378	102.47	1.14019	0.440441	-2.58875	0.00963243	0.0554937	Shq1
ENSMUSG00000031387	2028.88	1.14004	0.359235	-3.17353	0.00150598	0.0135368	Renbp
ENSMUSG00000103364	10.0782	1.13924	0.770039	-1.47945	0.139019	0.339119	Gm38157
ENSMUSG00000013495	945.814	1.13907	0.315725	-3.60778	0.00030883	0.00384983	Tmem175
ENSMUSG00000014361	529.453	1.13895	0.396617	-2.87167	0.00408314	0.0291971	Mertk
ENSMUSG00000029299	1185.7	1.13817	0.35645	-3.19306	0.00140773	0.0128987	Abcg3
ENSMUSG00000036775	385.528	1.13786	0.352081	-3.2318	0.00123015	0.0115725	Decr2
ENSMUSG00000020629	279.837	1.13542	0.351892	-3.22661	0.00125265	0.0116899	Adi1
ENSMUSG00000061371	56.3314	1.13466	0.50777	-2.23459	0.0254445	0.110046	Zfp873
ENSMUSG00000026220	11.1652	1.13432	0.741425	-1.52991	0.126039	0.317054	Slc16a14
ENSMUSG00000071669	385.529	1.13388	0.338594	-3.34879	0.000811667	0.00832894	Snx29
ENSMUSG00000030347	343.949	1.13383	0.368283	-3.07868	0.00207917	0.017246	D6Wsu163e
ENSMUSG00000053644	246.774	1.13351	0.372887	-3.03982	0.00236718	0.0190102	Aldh7a1
ENSMUSG00000074420	15.2899	1.1334	0.719073	-1.57619	0.114982	0.300572	Gm10693
ENSMUSG00000018848	1460.55	1.13287	0.330323	-3.42959	0.000604489	0.006601	Rars
ENSMUSG00000038147	1855.83	1.13217	0.295915	-3.82601	0.000130237	0.00189306	Cd84
ENSMUSG00000101567	248.706	1.132	0.355722	-3.18226	0.00146133	0.0132218	Txn-ps1
ENSMUSG00000028744	1073.31	1.13194	0.341815	-3.31156	0.000927778	0.00923268	Pqlc2
ENSMUSG00000046415	6.4295	1.13175	0.783672	-1.44417	0.148692	0.352959	B430212C06Rik
ENSMUSG00000023004	1656.42	1.13103	0.293919	-3.84808	0.000119046	0.00175909	Tuba1b
ENSMUSG00000035062	63.3891	1.13069	0.506153	-2.23389	0.02549	0.110212	Zc4h2
ENSMUSG00000107379	47.2845	1.13021	0.528504	-2.13851	0.0324754	0.130435	Gm43126
ENSMUSG00000073421	385104	1.12978	0.402927	-2.80393	0.00504838	0.0340288	H2-Ab1
ENSMUSG00000035845	212.503	1.12972	0.388445	-2.90832	0.00363373	0.0266178	Alg12
ENSMUSG00000026981	3816.47	1.12903	0.301879	-3.74002	0.000184008	0.00249283	Il1rn
ENSMUSG00000029814	74.0614	1.12885	0.556346	-2.02904	0.042454	0.156946	Igf2bp3
ENSMUSG00000039182	184.498	1.12815	0.367519	-3.06965	0.00214313	0.0175839	AW209491
ENSMUSG00000060036	575.78	1.12796	0.339586	-3.32158	0.000895104	0.00899618	Rpl3
ENSMUSG00000015837	5988.28	1.12711	0.30308	-3.71885	0.00020013	0.00266125	Sqstm1
ENSMUSG00000035105	38.6661	1.12708	0.563043	-2.00176	0.0453101	0.164315	Egln3
ENSMUSG00000020801	78.2817	1.12695	0.496693	-2.2689	0.0232742	0.103536	Med31
ENSMUSG00000007777	425.969	1.12677	0.351161	-3.20871	0.00133334	0.0123064	0610009B22Rik
ENSMUSG00000028864	227.313	1.12654	0.422823	-2.66434	0.00771388	0.0468439	Hgf
ENSMUSG00000091183	24.3842	1.12607	0.639482	-1.7609	0.0782548	0.235448	Gm5141
ENSMUSG00000031129	814.978	1.12606	0.336381	-3.34758	0.0008152	0.00834823	Slc9a9
ENSMUSG00000028156	1277.39	1.12586	0.297499	-3.78441	0.000154075	0.00217284	Eif4e
ENSMUSG00000073018	9.69306	1.12563	0.764636	-1.47211	0.140991	0.341727	Gm1070
ENSMUSG00000097415	744.187	1.12556	0.346578	-3.24763	0.00116369	0.0110295	AU020206
ENSMUSG00000034007	341.924	1.12536	0.335467	-3.35462	0.000794736	0.00819964	Scaper
ENSMUSG00000022550	126.081	1.1247	0.400216	-2.81022	0.00495072	0.0335679	Adck5
ENSMUSG00000007867	85.5813	1.12387	0.488038	-2.30283	0.0212884	0.0975787	Ift43
ENSMUSG00000026471	150.582	1.12379	0.423267	-2.65505	0.00792968	0.0478307	Mr1
ENSMUSG00000104136	8.71781	1.12368	0.762444	-1.47379	0.140538	0.341127	Gm36955
ENSMUSG00000092074	94.4805	1.12181	0.453945	-2.47125	0.0134643	0.0703472	Dynlt1a
ENSMUSG00000063488	12.1797	1.12136	0.749947	-1.49525	0.134848	0.332478	Zkscan7
ENSMUSG00000020277	3144.39	1.12069	0.286991	-3.90497	9.42378e-05	0.00144759	Pfkl
ENSMUSG00000040667	1291.16	1.12039	0.345028	-3.24724	0.0011653	0.011038	Nup88
ENSMUSG00000087338	656.018	1.11982	0.329865	-3.39477	0.000686857	0.00730557	Scpep1os
ENSMUSG00000025877	3343.94	1.11949	0.328983	-3.40287	0.000666827	0.00715131	Hk3
ENSMUSG00000023019	11.1801	1.11849	0.747622	-1.49607	0.134636	0.332116	Gpd1
ENSMUSG00000030647	1251.44	1.11679	0.309738	-3.6056	0.000311432	0.00387793	Ndufc2
ENSMUSG00000082070	131.477	1.11628	0.411578	-2.7122	0.00668388	0.0423269	Gm1866
ENSMUSG00000074281	22.0267	1.11603	0.664433	-1.67967	0.0930213	0.263095	Gm12522
ENSMUSG00000034602	242.928	1.11587	0.42487	-2.62638	0.00862991	0.0509387	Mon2
ENSMUSG00000070873	887.222	1.11477	0.300826	-3.70568	0.000210824	0.00277906	Lilra5
ENSMUSG00000097700	29.0576	1.1145	0.625323	-1.78228	0.0747032	0.228524	Gm26738
ENSMUSG00000107990	17.1931	1.11403	0.686106	-1.6237	0.104439	0.282514	Gm7890
ENSMUSG00000089197	34.5011	1.11394	0.576419	-1.93252	0.053296	0.182687	Gm25767
ENSMUSG00000026482	531.033	1.11383	0.317494	-3.5082	0.000451145	0.00522804	Rgl1
ENSMUSG00000005681	15.1688	1.11216	0.717322	-1.55044	0.121036	0.309271	Apoa2
ENSMUSG00000028383	840.679	1.11167	0.342205	-3.24854	0.00115998	0.011004	Hsdl2
ENSMUSG00000030614	454.155	1.11161	0.333709	-3.33109	0.000865073	0.00876415	Tmem126b
ENSMUSG00000038990	30.8398	1.11077	0.642163	-1.72973	0.0836791	0.246289	Cables2
ENSMUSG00000063388	117.009	1.11075	0.414873	-2.67733	0.00742117	0.0455807	BC023105
ENSMUSG00000056458	18.4693	1.11031	0.686958	-1.61627	0.106036	0.285652	Mok
ENSMUSG00000045048	10.1726	1.11025	0.747496	-1.4853	0.137465	0.336682	Gm9795
ENSMUSG00000084289	2244.11	1.10925	0.374937	-2.95849	0.00309149	0.0234002	Gm6977
ENSMUSG00000078485	175.699	1.10853	0.45894	-2.41542	0.0157172	0.0788774	Plekhn1
ENSMUSG00000030737	14.3854	1.10829	0.781586	-1.418	0.156191	0.364285	Slco2b1
ENSMUSG00000031808	465.964	1.10763	0.342309	-3.23576	0.00121321	0.0114416	Slc27a1
ENSMUSG00000074280	220.924	1.10723	0.442114	-2.50441	0.0122657	0.0660185	Gm6166
ENSMUSG00000020630	312.974	1.10676	0.363772	-3.04247	0.00234648	0.018864	Rnaseh1
ENSMUSG00000108155	15.4985	1.10565	0.733867	-1.50661	0.13191	0.327313	Gm44443
ENSMUSG00000097077	749.084	1.10551	0.373558	-2.9594	0.00308236	0.0233661	Gm16712
ENSMUSG00000024030	12070.2	1.10508	0.339287	-3.25705	0.00112576	0.0107848	Abcg1
ENSMUSG00000085546	86.3361	1.10449	0.477473	-2.31321	0.0207114	0.0958344	Gm14252
ENSMUSG00000020739	583.727	1.10395	0.32139	-3.43491	0.000592753	0.00649157	Nup85
ENSMUSG00000038235	4783.39	1.10391	0.302057	-3.65464	0.000257542	0.00329176	F11r
ENSMUSG00000025630	1690.61	1.10383	0.354669	-3.11227	0.00185652	0.0158416	Hprt
ENSMUSG00000021114	3135.48	1.10339	0.295873	-3.72927	0.000192037	0.00257754	Atp6v1d
ENSMUSG00000064267	1429.71	1.10244	0.331585	-3.32477	0.000884915	0.00889968	Hvcn1
ENSMUSG00000103291	21.1125	1.1021	0.665454	-1.65617	0.0976882	0.271683	Gm38235
ENSMUSG00000105374	7.82321	1.10159	0.773609	-1.42396	0.154459	0.361302	Gm42551
ENSMUSG00000027428	211.719	1.10098	0.371729	-2.96179	0.00305857	0.0232206	Rbbp9
ENSMUSG00000050043	674.724	1.10072	0.310644	-3.54336	0.000395066	0.00470045	Tmx2
ENSMUSG00000097616	39.3658	1.10047	0.547703	-2.00925	0.0445105	0.162057	1110019D14Rik
ENSMUSG00000022913	206.723	1.10015	0.371176	-2.96397	0.00303699	0.0231147	Psmg1
ENSMUSG00000040945	307.22	1.09966	0.337523	-3.25804	0.00112185	0.0107678	Rcc2
ENSMUSG00000016206	2314.46	1.09884	0.292552	-3.75604	0.000172623	0.00237255	H2-M3
ENSMUSG00000051355	326.67	1.09881	0.340865	-3.22361	0.00126588	0.0117987	Commd1
ENSMUSG00000027209	41.9953	1.09774	0.574569	-1.91055	0.0560622	0.189634	Fam227b
ENSMUSG00000108979	33.3597	1.09721	0.609595	-1.7999	0.071877	0.222992	RP23-383B18.3
ENSMUSG00000021666	2543.67	1.09697	0.313762	-3.49618	0.000471966	0.00539502	Gfm2
ENSMUSG00000030047	2681.04	1.09661	0.321345	-3.41256	0.000643561	0.00694752	Arhgap25
ENSMUSG00000041236	2071.2	1.09606	0.314884	-3.48084	0.000499845	0.00562874	Vps41
ENSMUSG00000028680	50.5384	1.09603	0.526443	-2.08195	0.0373468	0.143349	Plk3
ENSMUSG00000087135	56.7209	1.0952	0.494644	-2.21413	0.0268202	0.114235	Gm16096
ENSMUSG00000022668	563.781	1.09434	0.324987	-3.36732	0.000759019	0.00791742	Gtpbp8
ENSMUSG00000081113	878.447	1.09425	0.308548	-3.54646	0.000390438	0.00465269	Gm7308
ENSMUSG00000056121	1447.39	1.09349	0.295679	-3.69824	0.000217097	0.00283706	Fez2
ENSMUSG00000040272	218.079	1.09327	0.364115	-3.00254	0.00267739	0.0210658	Accs
ENSMUSG00000029156	612.196	1.09295	0.365927	-2.98679	0.00281922	0.0218749	Sgcb
ENSMUSG00000043602	104.098	1.0927	0.471208	-2.31894	0.0203983	0.0947708	Zfp3
ENSMUSG00000049404	14.5187	1.09249	0.725943	-1.50493	0.132342	0.32804	Rarres1
ENSMUSG00000039178	83.0123	1.09226	0.447696	-2.43974	0.0146978	0.0748715	Tbc1d19
ENSMUSG00000030329	15.9135	1.09216	0.723899	-1.50871	0.131372	0.326458	Pianp
ENSMUSG00000108368	49.6104	1.09162	0.514461	-2.12186	0.0338492	0.134061	RP23-335C3.10
ENSMUSG00000024197	1575.4	1.09151	0.29385	-3.71451	0.000203595	0.00269785	Plin3
ENSMUSG00000019810	3137.3	1.09059	0.322634	-3.38026	0.000724167	0.00762743	Fuca2
ENSMUSG00000028199	91.3819	1.08997	0.464815	-2.34495	0.0190295	0.0900902	Cryz
ENSMUSG00000024180	69.7334	1.08979	0.498847	-2.18461	0.0289172	0.12053	Tmem8
ENSMUSG00000027533	446.379	1.08913	0.421257	-2.58543	0.00972569	0.0559245	Fabp5
ENSMUSG00000027207	772.159	1.08912	0.336082	-3.24064	0.00119261	0.0112684	Galk2
ENSMUSG00000028238	30.6453	1.08881	0.677079	-1.60809	0.107814	0.288508	Atp6v0d2
ENSMUSG00000097224	406.805	1.08874	0.329131	-3.30793	0.000939869	0.00932848	Gm26716
ENSMUSG00000022827	131.444	1.08813	0.403245	-2.69844	0.00696645	0.0435468	Rabl3
ENSMUSG00000033773	315.22	1.08787	0.336947	-3.22859	0.00124401	0.0116667	Rpap2
ENSMUSG00000028086	107.348	1.0874	0.443357	-2.45265	0.0141806	0.0730544	Fbxw7
ENSMUSG00000019763	234.847	1.08729	0.36165	-3.00648	0.00264291	0.0208595	Rmnd1
ENSMUSG00000052419	1596.91	1.0851	0.312048	-3.47735	0.000506398	0.00568562	2610001J05Rik
ENSMUSG00000090327	110.629	1.08474	0.420474	-2.57981	0.00988543	0.0565195	Gm17111
ENSMUSG00000027276	23.1045	1.08473	0.654916	-1.65629	0.0976639	0.271665	Jag1
ENSMUSG00000085846	8.13231	1.08457	0.78609	-1.3797	0.167679	0.38068	Gm15597
ENSMUSG00000094685	472.639	1.08451	0.334745	-3.23981	0.00119608	0.0112941	Gm5900
ENSMUSG00000028563	560.468	1.08364	0.327655	-3.30724	0.000942186	0.00934535	Tm2d1
ENSMUSG00000027752	1219.43	1.08315	0.314577	-3.4432	0.000574864	0.0063185	Exosc8
ENSMUSG00000066442	137.704	1.08177	0.412295	-2.62378	0.00869593	0.0511688	Mthfs
ENSMUSG00000050957	176.771	1.08114	0.373073	-2.89792	0.00375648	0.0273537	Insl6
ENSMUSG00000026473	1383.12	1.08112	0.312604	-3.45842	0.000543349	0.00602899	Glul
ENSMUSG00000097546	29.031	1.08084	0.594549	-1.81791	0.0690778	0.217659	Gm26749
ENSMUSG00000085523	11.4971	1.07929	0.732726	-1.47298	0.140756	0.341498	Gm15945
ENSMUSG00000020149	4248.51	1.07916	0.327951	-3.29063	0.000999649	0.00979345	Rab1a
ENSMUSG00000036639	127.191	1.07881	0.400264	-2.69523	0.00703394	0.043806	Nudt1
ENSMUSG00000020513	161.731	1.07869	0.383252	-2.81456	0.00488442	0.0332791	Tubd1
ENSMUSG00000000365	22.8912	1.07867	0.640053	-1.68529	0.0919332	0.260802	Rnf17
ENSMUSG00000026047	187.542	1.07804	0.392868	-2.74401	0.00606931	0.0393518	Kdelc1
ENSMUSG00000041343	62.3395	1.0769	0.496327	-2.16974	0.0300264	0.123548	Ankrd42
ENSMUSG00000028085	221.435	1.0753	0.368701	-2.91646	0.00354028	0.0261184	Gatb
ENSMUSG00000027230	74.2653	1.07528	0.497563	-2.16109	0.0306882	0.125284	Creb3l1
ENSMUSG00000030187	5088.94	1.07419	0.320686	-3.34966	0.000809095	0.00830817	Klra2
ENSMUSG00000086507	717.188	1.0737	0.325326	-3.30038	0.000965542	0.00953953	Adap2os
ENSMUSG00000021280	61.9682	1.07363	0.487412	-2.20271	0.027615	0.116669	Exoc3l4
ENSMUSG00000027487	145.9	1.07307	0.422127	-2.54206	0.0110203	0.0610509	Cdk5rap1
ENSMUSG00000051510	526.973	1.07241	0.31707	-3.38225	0.000718958	0.0075831	Mafg
ENSMUSG00000085589	12.228	1.0722	0.728109	-1.47258	0.140864	0.341582	A430078I02Rik
ENSMUSG00000027712	16048.4	1.07212	0.286529	-3.74175	0.000182742	0.00248012	Anxa5
ENSMUSG00000035637	159.217	1.07184	0.404352	-2.65076	0.008031	0.0483264	Grhpr
ENSMUSG00000086561	8.51835	1.07074	0.766364	-1.39717	0.162363	0.373504	Gm15540
ENSMUSG00000054414	1443.84	1.07038	0.317206	-3.3744	0.000739772	0.0077664	Slc30a7
ENSMUSG00000036912	16.7228	1.07004	0.728671	-1.46848	0.141974	0.343229	Piwil4
ENSMUSG00000027550	215.453	1.06897	0.367563	-2.90827	0.00363433	0.0266178	Lrrcc1
ENSMUSG00000020553	417.515	1.06809	0.34273	-3.11643	0.00183053	0.0156913	Pctp
ENSMUSG00000019944	26.602	1.06797	0.623554	-1.71271	0.0867661	0.251755	Rhobtb1
ENSMUSG00000091866	109.432	1.06674	0.416288	-2.5625	0.0103921	0.0585343	Gm6257
ENSMUSG00000097585	395.944	1.06643	0.33782	-3.1568	0.00159509	0.0141035	Gm26529
ENSMUSG00000087598	119.302	1.06531	0.408031	-2.61087	0.00903135	0.0527125	Zfp111
ENSMUSG00000036672	350.28	1.06452	0.332554	-3.20104	0.00136931	0.0125847	Cenpt
ENSMUSG00000106856	16.9071	1.06426	0.703187	-1.51348	0.130159	0.324667	Gm43761
ENSMUSG00000107179	26.6297	1.06361	0.611909	-1.73818	0.0821797	0.243483	Gm43069
ENSMUSG00000023072	144.287	1.06315	0.424192	-2.50629	0.0122005	0.065761	Cep89
ENSMUSG00000017009	3690.38	1.06267	0.28498	-3.72892	0.000192303	0.00257754	Sdc4
ENSMUSG00000097769	21.1516	1.06177	0.648604	-1.63701	0.101627	0.278194	Snhg4
ENSMUSG00000025232	7670.83	1.06085	0.283088	-3.74741	0.000178671	0.00243577	Hexa
ENSMUSG00000047613	621.868	1.06063	0.321806	-3.29587	0.000981175	0.00967685	A430005L14Rik
ENSMUSG00000034783	35.528	1.06057	0.57369	-1.84868	0.0645046	0.208624	Cd207
ENSMUSG00000036634	89.3052	1.06042	0.440762	-2.40588	0.0161334	0.0802746	Mag
ENSMUSG00000025911	5.30666	1.06038	0.786111	-1.3489	0.17737	0.394485	Adhfe1
ENSMUSG00000064917	5.30666	1.06038	0.786111	-1.3489	0.17737	0.394485	Gm22574
ENSMUSG00000060427	309.274	1.06014	0.356528	-2.9735	0.00294424	0.0226133	Zfp868
ENSMUSG00000108604	8.41804	1.05848	0.766563	-1.38082	0.167335	0.380285	RP23-144N15.10
ENSMUSG00000055228	110.433	1.0581	0.464548	-2.2777	0.0227444	0.10201	Zfp935
ENSMUSG00000009739	45.9006	1.05582	0.556091	-1.89864	0.0576113	0.19322	Pou6f1
ENSMUSG00000062232	325.203	1.05497	0.355456	-2.96795	0.00299795	0.0229213	Rapgef2
ENSMUSG00000031791	89.6106	1.05492	0.437138	-2.41324	0.0158112	0.0792305	Tmem38a
ENSMUSG00000017286	920.194	1.05472	0.331623	-3.18048	0.0014703	0.013295	Glod4
ENSMUSG00000037697	211.797	1.05411	0.382405	-2.75651	0.0058421	0.0382058	Ddhd1
ENSMUSG00000035476	24.0947	1.05274	0.62552	-1.68298	0.0923788	0.261576	Tab3
ENSMUSG00000028127	421.247	1.05272	0.381879	-2.75667	0.00583931	0.038204	Abcd3
ENSMUSG00000038776	76.8722	1.05181	0.566075	-1.85808	0.0631571	0.205577	Ephx1
ENSMUSG00000031591	14484.4	1.05129	0.311436	-3.37561	0.000736534	0.00774153	Asah1
ENSMUSG00000035704	398.547	1.05125	0.338429	-3.10626	0.00189472	0.016077	Alg8
ENSMUSG00000070713	270.498	1.051	0.359208	-2.92586	0.003435	0.0255032	Gm10282
ENSMUSG00000027546	50.15	1.05079	0.53391	-1.96811	0.0490556	0.172923	Atp9a
ENSMUSG00000034278	244.093	1.05076	0.355042	-2.95954	0.00308099	0.0233661	Dnajc17
ENSMUSG00000030934	1498.37	1.05068	0.327491	-3.20828	0.00133533	0.0123172	Oat
ENSMUSG00000035914	301.616	1.05049	0.378907	-2.77242	0.00556416	0.0367851	Cd276
ENSMUSG00000100235	15.261	1.04975	0.7127	-1.47293	0.140771	0.341498	Gm28557
ENSMUSG00000107593	15.5043	1.04909	0.709622	-1.47838	0.139307	0.339547	Gm44097
ENSMUSG00000003206	1235.09	1.04841	0.37215	-2.81717	0.00484493	0.0330695	Ebi3
ENSMUSG00000107145	5.33779	1.04817	0.786145	-1.3333	0.182433	0.400512	Gm43442
ENSMUSG00000020409	1783.3	1.04754	0.291781	-3.59016	0.000330469	0.00406273	Slu7
ENSMUSG00000034413	50.0598	1.04753	0.534131	-1.96119	0.0498564	0.17496	Neurl1b
ENSMUSG00000015355	3518.2	1.04646	0.335062	-3.12318	0.00178906	0.0154136	Cd48
ENSMUSG00000106758	10.4872	1.04543	0.745603	-1.40213	0.160876	0.371153	Gm42731
ENSMUSG00000085037	5.2363	1.0454	0.786131	-1.3298	0.183583	0.401848	4933421O10Rik
ENSMUSG00000033554	336.108	1.04536	0.344713	-3.03254	0.00242504	0.0193927	Dph5
ENSMUSG00000010663	537.649	1.04467	0.33602	-3.10896	0.00187748	0.0159814	Fads1
ENSMUSG00000000489	84.8403	1.04425	0.440218	-2.37213	0.0176859	0.0856365	Pdgfb
ENSMUSG00000015656	7439.7	1.04406	0.30632	-3.40838	0.000653508	0.00702985	Hspa8
ENSMUSG00000040722	105.432	1.044	0.481368	-2.16882	0.0300961	0.123756	Scamp5
ENSMUSG00000042396	2630.05	1.04372	0.356794	-2.92528	0.00344151	0.0255265	Rbm7
ENSMUSG00000047678	188.047	1.04314	0.396767	-2.62911	0.00856081	0.050686	Gpr82
ENSMUSG00000027900	2313.71	1.0429	0.318473	-3.27468	0.0010578	0.010257	Dram2
ENSMUSG00000021116	1827.99	1.04267	0.300285	-3.47228	0.000516052	0.00577856	Eif2s1
ENSMUSG00000025959	429.605	1.04258	0.336188	-3.10119	0.00192742	0.0162634	Klf7
ENSMUSG00000047342	27.8389	1.04248	0.605127	-1.72275	0.084933	0.248514	Zfp286
ENSMUSG00000063052	411.716	1.04229	0.322951	-3.2274	0.0012492	0.0116829	Lrrc40
ENSMUSG00000017747	96.4768	1.04158	0.482279	-2.15971	0.0307953	0.125498	Ghdc
ENSMUSG00000024993	947.525	1.04085	0.329205	-3.16171	0.00156843	0.013982	Fam45a
ENSMUSG00000054342	1041.06	1.03817	0.303014	-3.42615	0.000612202	0.0066756	Kcnn4
ENSMUSG00000038079	260.15	1.03798	0.42339	-2.45159	0.0142225	0.0731708	Tmem237
ENSMUSG00000007837	261.19	1.03754	0.364678	-2.84508	0.00444003	0.0309902	Prrg2
ENSMUSG00000100529	6.66114	1.0364	0.779819	-1.32902	0.18384	0.402027	Gm19261
ENSMUSG00000024528	226.062	1.03591	0.367525	-2.81862	0.00482309	0.032965	Srfbp1
ENSMUSG00000001128	18362.7	1.03471	0.313946	-3.29582	0.000981357	0.00967685	Cfp
ENSMUSG00000068697	32.6049	1.03423	0.658344	-1.57095	0.116193	0.302382	Myoz1
ENSMUSG00000063698	15.1514	1.03348	0.720366	-1.43467	0.151383	0.357196	Sfxn4
ENSMUSG00000092325	301.337	1.03303	0.358965	-2.8778	0.00400464	0.0287325	Gm18284
ENSMUSG00000091900	96.141	1.03243	0.486829	-2.12072	0.0339455	0.134345	Gm4353
ENSMUSG00000052270	608.164	1.03151	0.328386	-3.14115	0.00168288	0.0146657	Fpr2
ENSMUSG00000038459	32.1228	1.03079	0.621208	-1.65934	0.0970476	0.270547	Abhd17c
ENSMUSG00000026851	1255.87	1.03013	0.295903	-3.4813	0.000498987	0.00562874	BC005624
ENSMUSG00000077704	7.4381	1.02995	0.776363	-1.32663	0.184631	0.402741	Snord89
ENSMUSG00000015671	1794.23	1.0282	0.30172	-3.40778	0.000654928	0.00704012	Psma2
ENSMUSG00000028247	160.062	1.02813	0.381966	-2.69167	0.00710954	0.0442041	Coq3
ENSMUSG00000097164	101.941	1.02799	0.450533	-2.28172	0.022506	0.101295	Cep83os
ENSMUSG00000003062	2179.23	1.02671	0.30173	-3.40273	0.00066716	0.00715131	Stard3nl
ENSMUSG00000104585	17.0246	1.02633	0.680455	-1.5083	0.131478	0.326562	4921511C10Rik
ENSMUSG00000086993	100.959	1.02549	0.43484	-2.35832	0.0183577	0.0882966	Rsf1os2
ENSMUSG00000028607	448.731	1.025	0.325669	-3.14736	0.0016475	0.0144404	Cpt2
ENSMUSG00000054237	182.999	1.02499	0.37102	-2.76263	0.0057337	0.0376758	Fra10ac1
ENSMUSG00000107749	16.333	1.02367	0.686028	-1.49217	0.135655	0.333869	Gm44321
ENSMUSG00000030703	47.1386	1.02366	0.520376	-1.96715	0.0491659	0.173219	Gdpd3
ENSMUSG00000042660	319.764	1.02321	0.344146	-2.97318	0.00294727	0.0226137	Wdr55
ENSMUSG00000045071	8.46414	1.02315	0.773927	-1.32202	0.186161	0.404766	E130308A19Rik
ENSMUSG00000044763	407.948	1.02307	0.33438	-3.0596	0.00221634	0.0180574	Trmt10c
ENSMUSG00000020305	297.318	1.02284	0.37345	-2.7389	0.0061645	0.0398156	Asb3
ENSMUSG00000063317	29.7757	1.02279	0.653547	-1.56498	0.117589	0.304288	Usp31
ENSMUSG00000075702	1039.84	1.02237	0.48753	-2.09705	0.0359894	0.139589	Selm
ENSMUSG00000006010	747.983	1.02222	0.307932	-3.31962	0.000901394	0.0090474	BC003331
ENSMUSG00000028691	5395.95	1.02206	0.323067	-3.16361	0.00155825	0.0139405	Prdx1
ENSMUSG00000051107	15.7462	1.02165	0.707491	-1.44405	0.148725	0.352959	Gm15440
ENSMUSG00000041684	96.6353	1.02135	0.479163	-2.13154	0.033045	0.132093	Bivm
ENSMUSG00000028048	2907.1	1.02084	0.287534	-3.55032	0.000384756	0.00459946	Gba
ENSMUSG00000093798	4322.29	1.01987	0.291626	-3.4972	0.000470161	0.00538251	Gm8355
ENSMUSG00000022221	2629.39	1.01963	0.287446	-3.54721	0.000389328	0.00464312	Ripk3
ENSMUSG00000024982	1898.28	1.01953	0.304495	-3.34826	0.000813197	0.00833335	Zdhhc6
ENSMUSG00000083626	402.112	1.01908	0.360395	-2.82766	0.00468893	0.0323547	Gm4459
ENSMUSG00000030619	754.668	1.01891	0.32405	-3.14431	0.00166477	0.0145581	Eed
ENSMUSG00000034744	798.128	1.01795	0.345046	-2.95018	0.00317586	0.023955	Nagk
ENSMUSG00000039043	77.5134	1.0177	0.49932	-2.03817	0.0415333	0.154599	Arpin
ENSMUSG00000001999	2043.05	1.01745	0.340505	-2.98807	0.00280747	0.0218061	Blvra
ENSMUSG00000037957	352.487	1.01701	0.351336	-2.89471	0.00379512	0.0275836	Wdr20
ENSMUSG00000081228	381.943	1.01675	0.343181	-2.96273	0.00304926	0.0231848	Gm16089
ENSMUSG00000032290	96.9212	1.01646	0.451723	-2.25018	0.0244373	0.107218	Ptpn9
ENSMUSG00000064493	14.0147	1.01553	0.708005	-1.43435	0.151473	0.357331	Snora28
ENSMUSG00000107596	43.3725	1.01439	0.543681	-1.86577	0.062073	0.203377	Gm18913
ENSMUSG00000072258	104.157	1.01413	0.449846	-2.25439	0.0241717	0.106364	Taf1a
ENSMUSG00000030751	4385.19	1.01405	0.284401	-3.56557	0.000363071	0.00437128	Psma1
ENSMUSG00000074677	12.5207	1.01378	0.723835	-1.40057	0.161344	0.371894	Sirpb1c
ENSMUSG00000075271	32.6598	1.01269	0.586165	-1.72765	0.0840518	0.247002	Ttc30a1
ENSMUSG00000039682	769.501	1.0124	0.351229	-2.88244	0.00394606	0.0284325	Lap3
ENSMUSG00000086191	7.54076	1.01235	0.776955	-1.30297	0.192585	0.41269	Zfp652os
ENSMUSG00000052144	69.4943	1.01225	0.481574	-2.10196	0.0355564	0.138584	Ppp4r2
ENSMUSG00000083055	20.5359	1.01165	0.649592	-1.55736	0.119386	0.307054	Gm14140
ENSMUSG00000072770	39.8472	1.01157	0.562688	-1.79774	0.0722175	0.223529	Acrbp
ENSMUSG00000027709	323.269	1.01145	0.340736	-2.96844	0.00299319	0.0229195	Mccc1
ENSMUSG00000078580	42.8134	1.00982	0.552196	-1.82873	0.0674406	0.214727	E430018J23Rik
ENSMUSG00000052369	357.159	1.00822	0.334655	-3.01272	0.00258916	0.0205101	Tmem106c
ENSMUSG00000053897	24.3113	1.00815	0.624127	-1.6153	0.106246	0.28579	Slc39a8
ENSMUSG00000035678	397.109	1.00806	0.37464	-2.69074	0.00712945	0.0442733	Tnfsf9
ENSMUSG00000021532	222.676	1.00789	0.389984	-2.58444	0.00975365	0.0560216	Fastkd3
ENSMUSG00000022837	36.3693	1.00789	0.607499	-1.65907	0.0971008	0.270646	Iqcb1
ENSMUSG00000074282	49.3143	1.00784	0.603048	-1.67125	0.0946732	0.266132	Zfp94
ENSMUSG00000086836	31.6568	1.00764	0.58628	-1.7187	0.0856695	0.249861	Gm13748
ENSMUSG00000030917	374.205	1.00736	0.328658	-3.06507	0.00217619	0.0178212	Tmem159
ENSMUSG00000107390	77.6178	1.00646	0.500328	-2.01159	0.0442627	0.161387	Gm43323
ENSMUSG00000019877	4494.4	1.0064	0.346643	-2.90328	0.00369276	0.0269675	Serinc1
ENSMUSG00000031851	1328.93	1.00605	0.346251	-2.90554	0.00366624	0.0268256	Ntpcr
ENSMUSG00000034708	27142.1	1.00578	0.301449	-3.33647	0.000848488	0.00862066	Grn
ENSMUSG00000028690	65.4481	1.00555	0.529514	-1.899	0.0575643	0.193105	Mmachc
ENSMUSG00000024610	551346	1.00537	0.315868	-3.18289	0.00145813	0.0132008	Cd74
ENSMUSG00000094530	3024.14	1.00527	0.327192	-3.07243	0.00212323	0.0174881	Gm21399
ENSMUSG00000035773	7.29168	1.00512	0.777081	-1.29346	0.195853	0.41743	Kiss1r
ENSMUSG00000002985	210024	1.00446	0.422932	-2.375	0.0175488	0.0851356	Apoe
ENSMUSG00000063849	751.811	1.00414	0.323489	-3.1041	0.0019086	0.0161495	Ppcdc
ENSMUSG00000107040	5.85305	1.00375	0.785172	-1.27838	0.201117	0.424482	Gm43791
ENSMUSG00000053687	5613.52	1.00366	0.316697	-3.16914	0.00152891	0.0137185	Dpep2
ENSMUSG00000084878	30.3104	1.00316	0.601668	-1.66731	0.0954536	0.26768	Lrrc8dos
ENSMUSG00000068323	5.13599	1.00316	0.785726	-1.27673	0.201699	0.424958	Slc4a5
ENSMUSG00000033917	989.006	1.00291	0.31015	-3.23362	0.00122231	0.0115199	Gde1
ENSMUSG00000039963	6.69226	1.00271	0.782861	-1.28083	0.200254	0.423065	Ccdc40
ENSMUSG00000062743	140.508	1.00268	0.398013	-2.51922	0.0117616	0.0641027	Zfp677
ENSMUSG00000021368	119.336	1.00219	0.412297	-2.43075	0.0150674	0.0763505	Tbc1d7
ENSMUSG00000003484	11907.4	1.00204	0.323618	-3.09637	0.00195905	0.0164752	Cyp4f18
ENSMUSG00000063535	41.3587	1.00181	0.567128	-1.76647	0.0773178	0.233255	Zfp773
ENSMUSG00000106558	265.365	1.00176	0.356013	-2.81384	0.00489537	0.0333084	Gm5552
ENSMUSG00000085655	27.7661	1.00169	0.605679	-1.65383	0.0981628	0.272247	Gm15952
ENSMUSG00000039908	267.599	1.00089	0.394313	-2.53833	0.0111384	0.06157	Slc26a11
ENSMUSG00000020261	145.352	1.00072	0.413881	-2.41789	0.0156107	0.0785936	Slc36a1
ENSMUSG00000102329	16.3111	1.0005	0.694961	-1.43965	0.149966	0.354628	Gm10851
ENSMUSG00000039740	333.302	1.00043	0.389378	-2.5693	0.0101903	0.0577198	Alg2
ENSMUSG00000009995	1171.76	1.00014	0.302703	-3.30401	0.000953119	0.00944142	Taz
ENSMUSG00000017652	1587.97	0.999972	0.307648	-3.25037	0.00115254	0.0109582	Cd40
ENSMUSG00000075420	17.5537	0.999402	0.68802	-1.45258	0.146342	0.349604	Smim6
ENSMUSG00000001089	458.695	0.999281	0.32013	-3.12149	0.00179939	0.0154674	Luzp1
ENSMUSG00000024742	1185.67	0.998368	0.319415	-3.12561	0.00177437	0.0153219	Fen1
ENSMUSG00000072541	5.0207	0.99822	0.786009	-1.26998	0.20409	0.427486	Gm5046
ENSMUSG00000066149	389.071	0.998139	0.360189	-2.77116	0.00558578	0.0368959	Cdc26
ENSMUSG00000025264	171.706	0.997142	0.38671	-2.57853	0.0099222	0.0566459	Tsr2
ENSMUSG00000024644	9780.22	0.996807	0.288991	-3.44926	0.000562122	0.00619193	Cndp2
ENSMUSG00000062210	3277.96	0.996587	0.287746	-3.46342	0.00053335	0.00594416	Tnfaip8
ENSMUSG00000031221	749.942	0.996055	0.309382	-3.2195	0.00128414	0.0119104	Igbp1
ENSMUSG00000085185	8.12181	0.99586	0.786016	-1.26697	0.205166	0.428638	BC028777
ENSMUSG00000042709	407.542	0.995722	0.325928	-3.05504	0.00225033	0.0182851	Atpaf2
ENSMUSG00000033793	1489.18	0.995509	0.305718	-3.2563	0.00112874	0.0107997	Atp6v1h
ENSMUSG00000068417	123.37	0.99531	0.401309	-2.48016	0.0131323	0.069111	Pnp2
ENSMUSG00000013089	402.018	0.995291	0.408556	-2.43612	0.0148457	0.0754037	Etv5
ENSMUSG00000040189	16.2811	0.994756	0.693589	-1.43422	0.151511	0.357331	Ccdc114
ENSMUSG00000064179	19.7243	0.994384	0.675423	-1.47224	0.140956	0.341701	Tnnt1
ENSMUSG00000024679	21266.2	0.994163	0.292354	-3.40054	0.000672522	0.0071783	Ms4a6d
ENSMUSG00000034035	83.5303	0.993002	0.468003	-2.12178	0.033856	0.134061	Ccdc17
ENSMUSG00000032679	10.7594	0.992794	0.763428	-1.30044	0.19345	0.413898	Cd59a
ENSMUSG00000062933	2843.35	0.992213	0.290286	-3.41806	0.000630696	0.00683299	Gm10123
ENSMUSG00000025235	102.367	0.991988	0.435428	-2.27819	0.0227151	0.101915	Bbs4
ENSMUSG00000005882	711.068	0.991222	0.317153	-3.12538	0.00177576	0.0153251	Uqcc1
ENSMUSG00000031392	425.497	0.991214	0.378809	-2.61666	0.00887945	0.0520405	Irak1
ENSMUSG00000032324	1069.3	0.990774	0.444112	-2.23091	0.025687	0.110653	Tspan3
ENSMUSG00000096351	50.3767	0.990509	0.52122	-1.90037	0.0573849	0.192546	Samd11
ENSMUSG00000081611	145.105	0.990265	0.451945	-2.19112	0.0284432	0.119236	Gm13651
ENSMUSG00000009927	330.925	0.989684	0.359917	-2.74976	0.00596395	0.0387682	Rps25
ENSMUSG00000029059	1489.75	0.989663	0.468688	-2.11156	0.0347241	0.136287	Fam213b
ENSMUSG00000024985	1963.12	0.989609	0.295234	-3.35195	0.00080245	0.00826234	Tcf7l2
ENSMUSG00000045414	33.4965	0.989408	0.605513	-1.634	0.102259	0.279279	1190002N15Rik
ENSMUSG00000049792	603.84	0.989345	0.323636	-3.05697	0.00223586	0.0181871	Bag5
ENSMUSG00000040570	11.6284	0.989253	0.730984	-1.35332	0.175954	0.393068	Rundc3b
ENSMUSG00000053600	166.978	0.988991	0.385181	-2.5676	0.0102405	0.0579029	Zfp472
ENSMUSG00000079555	349.871	0.988882	0.352787	-2.80306	0.00506202	0.034045	Haus3
ENSMUSG00000109214	10.8503	0.987628	0.738481	-1.33738	0.1811	0.398799	RP23-191I16.4
ENSMUSG00000038975	293.428	0.987298	0.350168	-2.8195	0.00480991	0.0329047	Rabggtb
ENSMUSG00000027963	248.828	0.987255	0.349008	-2.82874	0.00467311	0.0322602	Extl2
ENSMUSG00000028300	946.687	0.987132	0.323935	-3.04732	0.00230894	0.0186314	3110043O21Rik
ENSMUSG00000051065	16.741	0.986586	0.684952	-1.44037	0.149762	0.354438	Mb21d2
ENSMUSG00000031077	313.242	0.984999	0.35784	-2.75263	0.00591195	0.038546	Fadd
ENSMUSG00000001707	273.341	0.984604	0.360799	-2.72896	0.00635351	0.0406721	Eef1e1
ENSMUSG00000037085	420.563	0.984545	0.324352	-3.03542	0.002402	0.0192388	Trmt12
ENSMUSG00000019947	1445.96	0.984395	0.336818	-2.92263	0.00347089	0.0257066	Arid5b
ENSMUSG00000038371	55.6885	0.984378	0.519738	-1.89399	0.0582265	0.19468	Sbf2
ENSMUSG00000031200	41.2708	0.983672	0.550379	-1.78726	0.0738949	0.226837	Mtcp1
ENSMUSG00000100121	9.01863	0.983585	0.77104	-1.27566	0.202075	0.424958	1700025N23Rik
ENSMUSG00000018433	502.651	0.98347	0.328291	-2.99573	0.00273791	0.0214235	Nol11
ENSMUSG00000043953	971.239	0.983272	0.322884	-3.04528	0.0023246	0.0187279	Ccrl2
ENSMUSG00000109501	5.00455	0.982587	0.785501	-1.2509	0.210969	0.43694	Gm14377
ENSMUSG00000021037	2308.59	0.982476	0.317659	-3.09286	0.00198238	0.0166252	Ahsa1
ENSMUSG00000105813	216.632	0.982198	0.359528	-2.73191	0.00629677	0.0404114	Gm42928
ENSMUSG00000020265	2207.42	0.981797	0.295044	-3.32763	0.000875885	0.00883232	Sumo3
ENSMUSG00000003546	536.991	0.981695	0.358739	-2.73652	0.00620932	0.0400027	Klc4
ENSMUSG00000030871	81.2915	0.981655	0.452738	-2.16827	0.0301385	0.123807	Ears2
ENSMUSG00000086860	8.71535	0.981438	0.769227	-1.27588	0.202	0.424958	Gm1720
ENSMUSG00000078970	284.999	0.981034	0.34328	-2.85783	0.00426554	0.0300493	Wdr92
ENSMUSG00000063234	366.783	0.980963	0.3943	-2.48786	0.0128514	0.0680832	Gpr84
ENSMUSG00000049775	66078.9	0.980781	0.29708	-3.3014	0.000962032	0.00951727	Tmsb4x
ENSMUSG00000064936	10.056	0.980702	0.749314	-1.3088	0.190602	0.410307	Gm23722
ENSMUSG00000021891	634.095	0.980501	0.310796	-3.15481	0.00160604	0.0141672	Mettl6
ENSMUSG00000081052	16.6637	0.980352	0.684712	-1.43177	0.152209	0.357843	Gm6305
ENSMUSG00000026712	1919.46	0.980342	0.347042	-2.82485	0.00473026	0.0325509	Mrc1
ENSMUSG00000001436	139.409	0.979628	0.437758	-2.23783	0.0252322	0.109378	Slc19a1
ENSMUSG00000042500	58.0078	0.979614	0.543974	-1.80085	0.0717273	0.222574	Ago4
ENSMUSG00000106087	8.99672	0.979201	0.769076	-1.27322	0.202941	0.426139	Gm43609
ENSMUSG00000020826	175.062	0.979161	0.381704	-2.56524	0.0103105	0.0581978	Nos2
ENSMUSG00000032806	458.787	0.97859	0.349575	-2.79937	0.00512031	0.0343757	Slc10a3
ENSMUSG00000029204	934.962	0.977341	0.307957	-3.17363	0.00150547	0.0135368	Rhoh
ENSMUSG00000024246	71.9795	0.976247	0.490448	-1.99052	0.0465336	0.166965	Thumpd2
ENSMUSG00000106181	142.934	0.9762	0.387977	-2.51613	0.0118651	0.0645508	Gm9523
ENSMUSG00000097554	21087.6	0.975833	0.294192	-3.317	0.000909912	0.00912684	Gm26825
ENSMUSG00000020263	454.541	0.975652	0.355116	-2.74742	0.00600662	0.0390121	Appl2
ENSMUSG00000036940	93.3991	0.975	0.434573	-2.24358	0.0248594	0.108476	Kdm1a
ENSMUSG00000079110	10.9518	0.974979	0.74338	-1.31155	0.189672	0.40962	Capn3
ENSMUSG00000021537	705.828	0.974309	0.332008	-2.93459	0.00333986	0.0248944	Cetn3
ENSMUSG00000027534	99.1652	0.9742	0.456901	-2.13219	0.0329913	0.131948	Snx16
ENSMUSG00000021916	179.823	0.973826	0.37829	-2.57428	0.0100449	0.0571309	Glt8d1
ENSMUSG00000018930	2117.32	0.973531	0.288176	-3.37825	0.000729481	0.00767272	Ccl4
ENSMUSG00000021493	608.087	0.973334	0.420874	-2.31265	0.0207419	0.0958965	Pdlim7
ENSMUSG00000031987	125.457	0.972574	0.406468	-2.39274	0.0167229	0.0824498	Egln1
ENSMUSG00000079316	568.656	0.972283	0.325382	-2.98813	0.00280689	0.0218061	Rab9
ENSMUSG00000032126	746.541	0.971676	0.315298	-3.08177	0.00205774	0.0170869	Hmbs
ENSMUSG00000100801	23448.9	0.970438	0.292986	-3.31223	0.000925556	0.00921662	Gm15459
ENSMUSG00000063785	529.624	0.970378	0.317771	-3.05371	0.00226033	0.0183566	Utp14a
ENSMUSG00000018293	40008.2	0.970214	0.280878	-3.45422	0.000551885	0.00611027	Pfn1
ENSMUSG00000055334	198.522	0.970158	0.383944	-2.52682	0.0115101	0.0630724	Snupn
ENSMUSG00000041000	22.4494	0.969575	0.665434	-1.45706	0.145101	0.347913	Trim62
ENSMUSG00000032601	198.656	0.969465	0.36911	-2.6265	0.0086269	0.0509387	Prkar2a
ENSMUSG00000022103	8.91138	0.969211	0.770013	-1.2587	0.20814	0.43297	Gfra2
ENSMUSG00000100367	17.6218	0.969009	0.688035	-1.40837	0.159021	0.368559	Gm29336
ENSMUSG00000034175	221.676	0.968886	0.357774	-2.70809	0.00676707	0.0427136	Rhbdd3
ENSMUSG00000036438	7219.08	0.968618	0.29433	-3.29093	0.000998578	0.00978929	Calm2
ENSMUSG00000026228	8.92978	0.967808	0.777631	-1.24456	0.213293	0.439948	Htr2b
ENSMUSG00000045968	186.47	0.967622	0.375821	-2.57469	0.010033	0.0570851	Teddm2
ENSMUSG00000073725	1856.19	0.966224	0.325204	-2.97113	0.00296706	0.0227385	Lmbrd1
ENSMUSG00000038527	357.215	0.966176	0.332075	-2.90952	0.00361989	0.0265377	C1rl
ENSMUSG00000028037	1836.21	0.965826	0.416197	-2.3206	0.0203085	0.0945565	Ifi44
ENSMUSG00000026914	1947.08	0.965799	0.29979	-3.22159	0.00127483	0.0118603	Psmd14
ENSMUSG00000081277	162.454	0.965619	0.41502	-2.32668	0.0199821	0.0934679	Gm15285
ENSMUSG00000022244	76.0569	0.965276	0.455859	-2.11749	0.0342186	0.134972	Amacr
ENSMUSG00000032405	2624.25	0.964948	0.314255	-3.07059	0.00213636	0.0175379	Pias1
ENSMUSG00000025792	442.663	0.964577	0.338243	-2.85173	0.00434819	0.0304756	Slc25a10
ENSMUSG00000062638	8.7453	0.964565	0.774292	-1.24574	0.212861	0.439374	Btnl1
ENSMUSG00000032563	519.688	0.963581	0.355447	-2.7109	0.00671016	0.0424528	Mrpl3
ENSMUSG00000001783	2711.38	0.96311	0.303274	-3.17571	0.0014947	0.0134675	Rtcb
ENSMUSG00000000530	1441.38	0.96272	0.312134	-3.08431	0.00204023	0.0170162	Acvrl1
ENSMUSG00000075273	48.8872	0.961971	0.536151	-1.79422	0.0727783	0.224547	Ttc30b
ENSMUSG00000030983	1354.13	0.961859	0.321502	-2.99176	0.00277372	0.0216327	Bccip
ENSMUSG00000047879	1057.75	0.961857	0.30461	-3.15766	0.0015904	0.0141031	Usp14
ENSMUSG00000005674	489.325	0.961827	0.31953	-3.01013	0.00261135	0.0206442	Tomm40l
ENSMUSG00000048164	1072.83	0.961357	0.345356	-2.78367	0.00537482	0.0357519	Gm7204
ENSMUSG00000021832	1379.7	0.960854	0.310462	-3.09492	0.00196869	0.0165287	Psmc6
ENSMUSG00000022969	1953.53	0.960649	0.32172	-2.98598	0.00282673	0.021922	Il10rb
ENSMUSG00000034101	59.9409	0.959771	0.497729	-1.9283	0.0538179	0.18396	Ctnnd1
ENSMUSG00000018574	2064.23	0.959478	0.299845	-3.19992	0.00137467	0.0126263	Acadvl
ENSMUSG00000021975	1056.21	0.959331	0.321667	-2.98237	0.00286023	0.0221138	Ints9
ENSMUSG00000028133	10.1171	0.958836	0.759364	-1.26268	0.206703	0.431063	Rwdd3
ENSMUSG00000030979	255.86	0.958642	0.360491	-2.65927	0.00783099	0.0473311	Uros
ENSMUSG00000041632	411.126	0.958568	0.339286	-2.82525	0.00472435	0.0325404	Mrps27
ENSMUSG00000046519	719.308	0.958075	0.363632	-2.63474	0.00842014	0.0501303	Golph3l
ENSMUSG00000067608	541.84	0.957446	0.315644	-3.03331	0.00241889	0.0193536	Pcna-ps2
ENSMUSG00000095661	6.99191	0.957295	0.776711	-1.2325	0.217763	0.445587	Gm8935
ENSMUSG00000071658	89.6224	0.957023	0.444001	-2.15545	0.0311265	0.126426	Gng3
ENSMUSG00000033318	185.099	0.956783	0.396189	-2.41496	0.0157368	0.07895	Gstt2
ENSMUSG00000106917	593.982	0.956752	0.342247	-2.7955	0.00518196	0.0346516	Gm7832
ENSMUSG00000108897	9.97302	0.956416	0.748852	-1.27718	0.20154	0.424945	RP24-88J19.4
ENSMUSG00000048852	150.083	0.956191	0.443612	-2.15547	0.0311252	0.126426	Gm12185
ENSMUSG00000083692	503.328	0.956183	0.32058	-2.98267	0.0028575	0.022104	Gm9575
ENSMUSG00000029440	367.653	0.955957	0.335658	-2.84801	0.00439939	0.0307774	Psmd9
ENSMUSG00000060397	29.7572	0.955955	0.658569	-1.45156	0.146623	0.350056	Zfp128
ENSMUSG00000096140	34.3322	0.955698	0.587107	-1.62781	0.103565	0.281111	Ankrd66
ENSMUSG00000059482	160.106	0.955611	0.39921	-2.39375	0.016677	0.0822501	2610301B20Rik
ENSMUSG00000087269	38.5386	0.955144	0.556498	-1.71635	0.0860983	0.250569	D330023K18Rik
ENSMUSG00000099481	34.8728	0.954739	0.567345	-1.68282	0.0924098	0.261615	Xndc1
ENSMUSG00000034641	6655.04	0.954427	0.283944	-3.36132	0.000775715	0.00805828	Cd300ld
ENSMUSG00000002996	3772.78	0.954353	0.311828	-3.06051	0.0022096	0.0180122	Hbp1
ENSMUSG00000078619	213.326	0.954161	0.367515	-2.59625	0.00942469	0.0545666	Smarcd2
ENSMUSG00000010538	10.2209	0.953963	0.755458	-1.26276	0.206675	0.431063	Tsacc
ENSMUSG00000019970	3440.91	0.953764	0.329094	-2.89815	0.00375372	0.0273467	Sgk1
ENSMUSG00000037405	2153.77	0.953276	0.331767	-2.87333	0.0040617	0.0290868	Icam1
ENSMUSG00000106737	21.8756	0.952339	0.694086	-1.37208	0.17004	0.384105	Gm42962
ENSMUSG00000005846	1346.92	0.95175	0.304221	-3.12848	0.0017571	0.0152075	Rsl1d1
ENSMUSG00000028643	725.781	0.951285	0.312525	-3.04387	0.00233555	0.0187861	Svbp
ENSMUSG00000021483	396.915	0.95115	0.338553	-2.80945	0.00496257	0.0336111	Cdk20
ENSMUSG00000025486	422.274	0.950701	0.326266	-2.91388	0.00356963	0.0262518	Sirt3
ENSMUSG00000028293	317.816	0.950029	0.341376	-2.78294	0.00538686	0.0358162	Slc35a1
ENSMUSG00000029208	128.94	0.949844	0.520376	-1.8253	0.0679555	0.215596	Guf1
ENSMUSG00000014232	56.0826	0.949655	0.510539	-1.8601	0.0628711	0.20496	Cluap1
ENSMUSG00000095567	137.834	0.949307	0.391768	-2.42314	0.0153871	0.0776328	Noc2l
ENSMUSG00000079465	4.80509	0.94895	0.785742	-1.20771	0.227158	0.457945	Col4a3
ENSMUSG00000022769	2985.29	0.948853	0.287484	-3.30054	0.000964981	0.00953953	Sdf2l1
ENSMUSG00000030823	108.657	0.947619	0.4746	-1.99667	0.0458611	0.16544	9130019O22Rik
ENSMUSG00000031637	27.0594	0.947459	0.60863	-1.55671	0.11954	0.307186	Lrp2bp
ENSMUSG00000033111	653.011	0.947043	0.314082	-3.01527	0.0025675	0.0203706	3830406C13Rik
ENSMUSG00000022404	1255.57	0.946748	0.301574	-3.13935	0.00169323	0.0147388	Slc25a17
ENSMUSG00000035960	627.541	0.946387	0.312757	-3.02595	0.00247854	0.0197268	Apex1
ENSMUSG00000005656	3840.49	0.946126	0.306056	-3.09135	0.0019925	0.0166824	Snx6
ENSMUSG00000030774	1319.4	0.945923	0.332547	-2.84448	0.00444836	0.0310055	Pak1
ENSMUSG00000106676	6.39826	0.945879	0.784809	-1.20523	0.228113	0.459258	Gm42895
ENSMUSG00000021572	73.857	0.945871	0.492391	-1.92098	0.0547346	0.186127	Cep72
ENSMUSG00000048550	100.389	0.945793	0.4228	-2.23697	0.025288	0.109589	Thnsl1
ENSMUSG00000085039	211.304	0.94574	0.368886	-2.56378	0.010354	0.0584069	Gm15927
ENSMUSG00000106202	10.0387	0.945252	0.763555	-1.23796	0.21573	0.443331	Gm43727
ENSMUSG00000021650	1150	0.944994	0.299974	-3.15025	0.00163129	0.014348	Ptcd2
ENSMUSG00000087380	47.6767	0.944868	0.540517	-1.74808	0.08045	0.23972	2210408F21Rik
ENSMUSG00000021501	435.22	0.943692	0.323084	-2.92089	0.00349035	0.0258333	Caml
ENSMUSG00000017697	333.685	0.943442	0.401624	-2.34907	0.0188206	0.0894997	Ada
ENSMUSG00000021646	132.93	0.94309	0.403047	-2.3399	0.019289	0.0909665	Mccc2
ENSMUSG00000026806	309.941	0.943044	0.348968	-2.70238	0.00688448	0.0431948	Ddx31
ENSMUSG00000037822	2317.57	0.942635	0.319858	-2.94704	0.00320832	0.0241517	Smim14
ENSMUSG00000010721	14.8054	0.942613	0.706781	-1.33367	0.182312	0.400462	Lmbr1
ENSMUSG00000045827	722.653	0.942347	0.335156	-2.81167	0.00492853	0.0334592	Serpinb9
ENSMUSG00000027995	5754.56	0.942225	0.328729	-2.86626	0.0041535	0.0294381	Tlr2
ENSMUSG00000082809	95.8992	0.941239	0.457896	-2.05557	0.0398235	0.149744	Gm14150
ENSMUSG00000044496	120.377	0.940485	0.449802	-2.09089	0.0365383	0.141248	2510039O18Rik
ENSMUSG00000101655	108.575	0.939602	0.438938	-2.14063	0.0323043	0.130059	2310040G24Rik
ENSMUSG00000039354	309.9	0.939433	0.341342	-2.75217	0.00592015	0.0385497	Smarcal1
ENSMUSG00000034792	836.525	0.938046	0.311217	-3.01413	0.00257721	0.0204368	Gna15
ENSMUSG00000040329	7.65476	0.937993	0.770947	-1.21668	0.223728	0.453261	Il7
ENSMUSG00000029735	65.2691	0.937894	0.482607	-1.94339	0.0519688	0.179503	Tpk1
ENSMUSG00000025178	175.642	0.937397	0.381406	-2.45774	0.0139814	0.0722737	Pi4k2a
ENSMUSG00000032527	106.811	0.93726	0.418089	-2.24177	0.0249762	0.108704	Pccb
ENSMUSG00000021118	10.5862	0.936607	0.751767	-1.24587	0.212811	0.439372	Plek2
ENSMUSG00000034303	29.8504	0.936584	0.63721	-1.46982	0.14161	0.342703	Ccdc15
ENSMUSG00000018238	26.1915	0.935867	0.655821	-1.42701	0.153576	0.360108	Gdf9
ENSMUSG00000097412	1656.17	0.93537	0.296005	-3.15998	0.00157781	0.0140244	1810014B01Rik
ENSMUSG00000032220	1830.04	0.935343	0.332365	-2.81421	0.00488978	0.0332856	Myo1e
ENSMUSG00000027849	99.77	0.93418	0.428712	-2.17904	0.0293287	0.121736	Syt6
ENSMUSG00000011008	90.1611	0.933582	0.505121	-1.84823	0.0645684	0.208786	Mcoln2
ENSMUSG00000097573	6.05133	0.932598	0.784206	-1.18923	0.234351	0.46514	G730003C15Rik
ENSMUSG00000045282	14.7754	0.93196	0.707808	-1.31669	0.187944	0.406773	Tmem86b
ENSMUSG00000034617	159.955	0.931223	0.389412	-2.39136	0.0167863	0.0826545	Mtrr
ENSMUSG00000097903	207.574	0.930132	0.363194	-2.56098	0.0104378	0.0587041	Gm26679
ENSMUSG00000024371	8.34756	0.930125	0.765786	-1.2146	0.224518	0.454331	C2
ENSMUSG00000034110	64.0853	0.929599	0.50884	-1.8269	0.0677151	0.215194	Kctd7
ENSMUSG00000063129	68.9867	0.929186	0.466638	-1.99124	0.0464549	0.16685	Aldoart2
ENSMUSG00000073771	168.681	0.928964	0.417645	-2.22429	0.0261288	0.112014	Btbd19
ENSMUSG00000028653	226.94	0.9288	0.364821	-2.54591	0.0108994	0.0605141	Trit1
ENSMUSG00000060519	9322.2	0.928661	0.293828	-3.16056	0.00157464	0.0140126	Tor3a
ENSMUSG00000001305	227.921	0.928443	0.372604	-2.49177	0.012711	0.0676199	Rrp15
ENSMUSG00000058542	21.8377	0.928242	0.707859	-1.31134	0.189744	0.40962	Gm15590
ENSMUSG00000089857	27.1124	0.927867	0.635681	-1.45964	0.144389	0.346808	Zfp882
ENSMUSG00000040813	1193.86	0.927805	0.349857	-2.65195	0.00800274	0.0481946	Tex264
ENSMUSG00000026709	335.335	0.927771	0.350034	-2.65052	0.00803681	0.0483422	Dars2
ENSMUSG00000061578	18.1633	0.926731	0.671575	-1.37994	0.167606	0.380656	Ksr2
ENSMUSG00000028182	5.43681	0.926693	0.785678	-1.17948	0.238206	0.468999	Lrriq3
ENSMUSG00000097006	212.09	0.926472	0.412281	-2.24719	0.024628	0.107777	9530082P21Rik
ENSMUSG00000006281	4003.14	0.926141	0.283995	-3.26111	0.00110975	0.010672	Tep1
ENSMUSG00000026036	549.77	0.925997	0.330145	-2.80482	0.00503442	0.0339655	Nif3l1
ENSMUSG00000053040	627.001	0.925764	0.321467	-2.87981	0.00397919	0.0286135	Aph1c
ENSMUSG00000074802	261.902	0.925299	0.345511	-2.67806	0.00740505	0.0455367	Gas2l3
ENSMUSG00000003662	655.085	0.924783	0.309173	-2.99115	0.00277931	0.021654	Ciao1
ENSMUSG00000028879	1349.39	0.923836	0.320417	-2.88323	0.00393623	0.0283896	Stx12
ENSMUSG00000097667	20.6776	0.923813	0.666651	-1.38575	0.165822	0.378131	Gm26764
ENSMUSG00000005580	26.2812	0.92357	0.662493	-1.39408	0.163292	0.374901	Adcy9
ENSMUSG00000034379	120.964	0.92252	0.403621	-2.28561	0.0222772	0.100599	Wdr5b
ENSMUSG00000034799	122.343	0.921917	0.437265	-2.10837	0.0349991	0.137096	Unc13a
ENSMUSG00000037649	12301.7	0.921501	0.300661	-3.06491	0.00217733	0.0178212	H2-DMa
ENSMUSG00000014905	876.733	0.921243	0.356297	-2.58561	0.00972073	0.0559173	Dnajb9
ENSMUSG00000026356	1726.31	0.920902	0.330524	-2.78619	0.00533316	0.035506	Dars
ENSMUSG00000097090	46.1917	0.920833	0.554551	-1.6605	0.0968136	0.270094	Gm26724
ENSMUSG00000021520	528.26	0.920718	0.328409	-2.80357	0.00505396	0.0340394	Uqcrb
ENSMUSG00000031711	334.922	0.920713	0.3446	-2.67183	0.00754393	0.0460913	Zfp330
ENSMUSG00000035891	354.469	0.920153	0.359676	-2.55828	0.0105191	0.0589862	Cerk
ENSMUSG00000091498	1068.35	0.919348	0.348586	-2.63736	0.0083554	0.0498428	Mpc1-ps
ENSMUSG00000003680	1992.3	0.91911	0.29067	-3.16204	0.00156667	0.0139746	Taf6l
ENSMUSG00000107715	16.8596	0.918817	0.70436	-1.30447	0.192073	0.41201	Gm44135
ENSMUSG00000019863	205.71	0.918165	0.429672	-2.13689	0.0326065	0.130858	Qrsl1
ENSMUSG00000055725	142.042	0.917879	0.418415	-2.1937	0.0282568	0.118652	Paqr3
ENSMUSG00000057990	22.1209	0.917708	0.729636	-1.25776	0.208478	0.433321	E030024N20Rik
ENSMUSG00000023156	252.944	0.916361	0.372616	-2.45926	0.0139224	0.0721163	Rpp14
ENSMUSG00000033307	416.382	0.91636	0.350027	-2.61797	0.00884552	0.0518677	Mif
ENSMUSG00000050075	3117.78	0.916077	0.328596	-2.78785	0.00530594	0.0353714	Gpr171
ENSMUSG00000050967	131.673	0.91597	0.420903	-2.1762	0.02954	0.122344	Creg2
ENSMUSG00000034442	166.671	0.915895	0.377461	-2.42646	0.0152469	0.0771306	Trmt5
ENSMUSG00000021028	304.604	0.915708	0.372832	-2.45609	0.0140459	0.0725826	Mbip
ENSMUSG00000109445	40.5535	0.915466	0.557993	-1.64064	0.100872	0.276688	RP23-175F18.1
ENSMUSG00000074862	12.5182	0.915173	0.733243	-1.24812	0.211988	0.438451	BC025920
ENSMUSG00000039166	37.6312	0.914793	0.577514	-1.58402	0.11319	0.297583	Akap7
ENSMUSG00000026821	214.719	0.914536	0.409844	-2.23143	0.0256529	0.110569	Ralgds
ENSMUSG00000040599	616.384	0.914217	0.346049	-2.64187	0.00824488	0.0494366	Mis12
ENSMUSG00000045952	44.2276	0.913919	0.570151	-1.60294	0.108947	0.290462	Gm5548
ENSMUSG00000085111	160.983	0.913867	0.407223	-2.24414	0.0248232	0.108381	Ascl4
ENSMUSG00000022407	608.846	0.913706	0.3138	-2.91175	0.00359408	0.0264124	Adsl
ENSMUSG00000081865	28.3057	0.913244	0.648942	-1.40728	0.159344	0.369026	Gm15484
ENSMUSG00000041859	1009.72	0.91311	0.310812	-2.93783	0.00330523	0.0246971	Mcm3
ENSMUSG00000018919	56.5961	0.913105	0.595762	-1.53267	0.125358	0.315865	Tm4sf5
ENSMUSG00000039048	867.616	0.913059	0.342929	-2.66253	0.00775555	0.0469863	Foxred1
ENSMUSG00000028932	2239.41	0.912957	0.288648	-3.16287	0.00156221	0.0139677	Psmc2
ENSMUSG00000037636	98.2886	0.912582	0.429199	-2.12624	0.0334829	0.133351	Slc25a43
ENSMUSG00000044573	467.306	0.912336	0.349217	-2.61252	0.00898777	0.0525391	Acp1
ENSMUSG00000040429	46.7923	0.912163	0.559907	-1.62913	0.103285	0.28084	Mterf1a
ENSMUSG00000038665	9.70897	0.911858	0.758322	-1.20247	0.229182	0.459882	Dgki
ENSMUSG00000064037	732.207	0.91175	0.315113	-2.89341	0.00381086	0.0276566	Gpn1
ENSMUSG00000059301	16.0642	0.911559	0.688916	-1.32318	0.185776	0.404298	Gm5434
ENSMUSG00000005804	709.691	0.911446	0.326521	-2.79138	0.00524831	0.035018	Bloc1s6
ENSMUSG00000106739	15.4128	0.911415	0.715445	-1.27391	0.202694	0.425796	Gm43499
ENSMUSG00000104713	1066.26	0.911412	0.348991	-2.61156	0.00901294	0.0526456	Gbp6
ENSMUSG00000086429	281.388	0.911216	0.345269	-2.63915	0.00831141	0.0496782	Gt(ROSA)26Sor
ENSMUSG00000079547	11305.5	0.9105	0.336392	-2.70667	0.00679626	0.0428365	H2-DMb1
ENSMUSG00000036822	1166.37	0.910436	0.317833	-2.86451	0.00417655	0.0295309	Topors
ENSMUSG00000081731	81.9227	0.909914	0.449331	-2.02504	0.0428632	0.157901	Calr-ps
ENSMUSG00000030201	134.451	0.90987	0.474027	-1.91945	0.0549277	0.1867	Lrp6
ENSMUSG00000094942	38.1419	0.909515	0.559841	-1.62459	0.104249	0.282347	Gm3604
ENSMUSG00000074064	24.8484	0.908897	0.658788	-1.37965	0.167694	0.38068	Mlycd
ENSMUSG00000019087	11772.2	0.908455	0.284754	-3.19032	0.00142116	0.012959	Atp6ap1
ENSMUSG00000025816	190.301	0.908307	0.39294	-2.31157	0.0208015	0.0960494	Sec61a2
ENSMUSG00000029073	303.884	0.908045	0.347895	-2.61011	0.0090512	0.052808	Cptp
ENSMUSG00000058093	174.924	0.907973	0.394917	-2.29915	0.0214966	0.0981867	Zfp729b
ENSMUSG00000016496	1963.03	0.907727	0.354217	-2.56263	0.0103883	0.0585343	Cd274
ENSMUSG00000108004	10.4006	0.907507	0.756167	-1.20014	0.230085	0.460656	Gm44080
ENSMUSG00000051037	54.887	0.907268	0.520045	-1.74459	0.0810555	0.241144	Zfp455
ENSMUSG00000067424	41.53	0.907248	0.561025	-1.61713	0.105851	0.285423	Zfp563
ENSMUSG00000089838	433.943	0.907157	0.348153	-2.60563	0.0091705	0.0533192	Gm2962
ENSMUSG00000055760	103.612	0.907152	0.418031	-2.17006	0.0300023	0.123511	Gemin6
ENSMUSG00000098050	7.52332	0.906779	0.774078	-1.17143	0.241426	0.472433	Gm5345
ENSMUSG00000106831	1086.86	0.90657	0.301899	-3.00289	0.00267431	0.0210525	Ube2n-ps1
ENSMUSG00000037661	744.441	0.906555	0.323859	-2.79923	0.00512254	0.0343757	Gpr160
ENSMUSG00000062488	1800.8	0.906021	0.302226	-2.99782	0.00271919	0.0213061	Ifit3b
ENSMUSG00000038160	761.906	0.90584	0.309589	-2.92594	0.00343412	0.0255032	Atg5
ENSMUSG00000028414	48.6332	0.905128	0.517568	-1.74881	0.0803235	0.239484	Fktn
ENSMUSG00000043372	36.1328	0.905118	0.595258	-1.52055	0.128374	0.321433	Hexim2
ENSMUSG00000098985	98.5595	0.904932	0.422813	-2.14026	0.0323335	0.130107	Gm27219
ENSMUSG00000036552	158.139	0.904537	0.416332	-2.17264	0.0298078	0.123016	Ermard
ENSMUSG00000054715	124.754	0.90447	0.411704	-2.1969	0.0280279	0.117886	Zscan22
ENSMUSG00000062691	349.916	0.904346	0.390214	-2.31756	0.0204731	0.0950018	Cebpzos
ENSMUSG00000087120	6.94581	0.904121	0.782082	-1.15604	0.247663	0.479314	Gm12279
ENSMUSG00000033849	5.93604	0.903876	0.783493	-1.15365	0.248644	0.480512	B3galt2
ENSMUSG00000059923	802.009	0.903869	0.319908	-2.8254	0.0047222	0.0325404	Grb2
ENSMUSG00000031898	7.24675	0.903744	0.78484	-1.1515	0.249526	0.481748	Dpep3
ENSMUSG00000026526	998.33	0.903592	0.363547	-2.48549	0.0129373	0.0683455	Fh1
ENSMUSG00000099875	792.179	0.903476	0.390364	-2.31444	0.0206435	0.0956165	Gm15453
ENSMUSG00000025439	759.935	0.903339	0.313542	-2.88108	0.00396321	0.0285298	Clns1a
ENSMUSG00000078853	8382.89	0.902591	0.28277	-3.19196	0.00141311	0.012924	Igtp
ENSMUSG00000017760	23515.1	0.902507	0.280092	-3.22218	0.00127221	0.0118488	Ctsa
ENSMUSG00000033323	94.5516	0.902209	0.53856	-1.67522	0.0938901	0.264717	Ctdp1
ENSMUSG00000000982	1005.88	0.901374	0.302669	-2.97808	0.00290057	0.0223573	Ccl3
ENSMUSG00000040659	1898.68	0.901372	0.341746	-2.63755	0.0083508	0.049835	Efhd2
ENSMUSG00000035772	381.582	0.901308	0.336797	-2.67612	0.0074481	0.0456531	Mrps2
ENSMUSG00000050345	27.1988	0.901299	0.61295	-1.47043	0.141445	0.342499	4930486L24Rik
ENSMUSG00000027714	573.929	0.90097	0.314237	-2.86717	0.00414158	0.0293894	Exosc9
ENSMUSG00000026750	1390.05	0.900838	0.305959	-2.94431	0.00323675	0.0243173	Psmb7
ENSMUSG00000023456	4829.9	0.900581	0.330914	-2.72149	0.00649878	0.0413922	Tpi1
ENSMUSG00000063145	34.5475	0.900519	0.572986	-1.57162	0.116038	0.302187	Bbs5
ENSMUSG00000089902	51.2788	0.900102	0.522123	-1.72393	0.0847212	0.248165	Gm13625
ENSMUSG00000104292	23.8349	0.900035	0.667514	-1.34834	0.177549	0.394625	Gm38042
ENSMUSG00000029050	465.292	0.899982	0.382222	-2.3546	0.0185424	0.0889028	Ski
ENSMUSG00000083649	13.7759	0.899882	0.710327	-1.26686	0.205206	0.428638	Rasl2-9
ENSMUSG00000063623	500.179	0.89938	0.35608	-2.52578	0.0115443	0.0632366	C230062I16Rik
ENSMUSG00000087050	24.7848	0.899064	0.620772	-1.4483	0.147534	0.351565	Dhrs13os
ENSMUSG00000108436	29.9596	0.898842	0.612768	-1.46686	0.142415	0.343748	RP23-137A24.6
ENSMUSG00000030946	151.41	0.898617	0.392471	-2.28964	0.0220423	0.0998362	Lhpp
ENSMUSG00000018459	253.029	0.898194	0.400816	-2.24092	0.0250316	0.108857	Slc13a3
ENSMUSG00000071640	523.972	0.897846	0.342071	-2.62474	0.00867161	0.05107	Stxbp3-ps
ENSMUSG00000031304	9482.72	0.897841	0.283237	-3.16993	0.00152475	0.0136893	Il2rg
ENSMUSG00000033629	1125.76	0.897496	0.329959	-2.72002	0.0065277	0.0415414	Hacd3
ENSMUSG00000102923	10.3649	0.89744	0.750747	-1.1954	0.231932	0.462774	Gm31728
ENSMUSG00000008167	64.2715	0.896881	0.499593	-1.79522	0.0726183	0.224465	Fbxw9
ENSMUSG00000043510	268.711	0.896818	0.345501	-2.5957	0.0094398	0.0546333	Hscb
ENSMUSG00000086083	108.298	0.896748	0.419573	-2.13729	0.0325748	0.130765	Gm15829
ENSMUSG00000105995	5.33896	0.896143	0.779858	-1.14911	0.25051	0.482849	Gm43554
ENSMUSG00000024696	2784.7	0.896059	0.290446	-3.08511	0.00203476	0.0169799	Lpxn
ENSMUSG00000020268	11.9027	0.895743	0.749699	-1.1948	0.232164	0.462983	Lyrm7
ENSMUSG00000027555	68.2208	0.895438	0.485883	-1.84291	0.0653424	0.210435	Car13
ENSMUSG00000040795	213.212	0.895346	0.360883	-2.48099	0.013102	0.068985	Iqcc
ENSMUSG00000108701	627.367	0.895328	0.317469	-2.8202	0.00479936	0.0328473	RP23-26J4.3
ENSMUSG00000029413	5560.55	0.895245	0.333791	-2.68205	0.00731718	0.0451246	Naaa
ENSMUSG00000019718	6.63824	0.895194	0.776467	-1.15291	0.248949	0.48088	L3hypdh
ENSMUSG00000023809	7.47499	0.894676	0.78609	-1.13813	0.255064	0.48755	Rps6ka2
ENSMUSG00000026748	48.4038	0.893847	0.515063	-1.73541	0.0826679	0.244262	Plxdc2
ENSMUSG00000090964	30.5014	0.89321	0.592992	-1.50628	0.131996	0.327417	Gm17206
ENSMUSG00000056019	161.877	0.892612	0.379975	-2.34913	0.0188172	0.0894997	Zfp709
ENSMUSG00000108377	7.5521	0.892489	0.779992	-1.14423	0.252529	0.484766	RP24-168I21.1
ENSMUSG00000028367	2017.53	0.892409	0.313716	-2.84464	0.00444616	0.0310055	Txn1
ENSMUSG00000020056	576.616	0.892217	0.31222	-2.85766	0.00426782	0.0300513	Ccdc53
ENSMUSG00000040040	78.2641	0.892176	0.480045	-1.85853	0.0630941	0.205466	Ift88
ENSMUSG00000060183	62.1599	0.89208	0.541626	-1.64704	0.0995494	0.274556	Cxcl11
ENSMUSG00000055188	45.3789	0.891971	0.535226	-1.66653	0.0956079	0.268013	Rbm3os
ENSMUSG00000066632	18.1726	0.891539	0.691442	-1.28939	0.197262	0.41933	Pgk1-rs7
ENSMUSG00000016481	1278.88	0.891527	0.3006	-2.96583	0.00301871	0.0230571	Cr1l
ENSMUSG00000024513	409.65	0.891294	0.330556	-2.69635	0.00701049	0.0437498	Mbd2
ENSMUSG00000035041	63.367	0.891217	0.517854	-1.72098	0.0852541	0.249049	Creb3l3
ENSMUSG00000067929	12.3568	0.891122	0.734753	-1.21282	0.225199	0.45545	Gm10226
ENSMUSG00000082906	16.3594	0.8911	0.710277	-1.25458	0.209631	0.434919	Smt3h1-ps
ENSMUSG00000097245	296.736	0.891054	0.375585	-2.37244	0.0176711	0.0856024	Gm5421
ENSMUSG00000102495	63.1119	0.890678	0.491501	-1.81216	0.0699619	0.219388	Gm26524
ENSMUSG00000060923	8.7625	0.89008	0.760446	-1.17047	0.241811	0.472883	Acyp2
ENSMUSG00000034473	298.953	0.889905	0.336964	-2.64095	0.00826738	0.0495125	Sec22a
ENSMUSG00000020610	407.35	0.88979	0.330087	-2.69562	0.00702568	0.0437828	Amz2
ENSMUSG00000046718	4497.57	0.88978	0.285595	-3.11553	0.00183613	0.0157155	Bst2
ENSMUSG00000091089	8.1988	0.889711	0.77464	-1.14855	0.250742	0.483011	A930018M24Rik
ENSMUSG00000042389	91.371	0.889684	0.457304	-1.9455	0.0517149	0.178993	Tsen2
ENSMUSG00000033355	6218.67	0.889682	0.287062	-3.09927	0.00194	0.0163604	Rtp4
ENSMUSG00000033114	363.247	0.889611	0.331001	-2.68764	0.00719586	0.0446126	Slc35d2
ENSMUSG00000090150	120.24	0.889301	0.412285	-2.15701	0.0310053	0.126051	Acad11
ENSMUSG00000002326	1197.72	0.889127	0.307041	-2.89579	0.003782	0.0275131	Gmpr2
ENSMUSG00000016256	35424.2	0.888713	0.341756	-2.60043	0.00931062	0.0540177	Ctsz
ENSMUSG00000095677	171.745	0.888381	0.393842	-2.25568	0.024091	0.106185	Dynlt1f
ENSMUSG00000021615	396.509	0.888323	0.331187	-2.68224	0.00731316	0.0451182	Xrcc4
ENSMUSG00000027775	4165.69	0.888155	0.317166	-2.80029	0.00510574	0.0343085	Mfsd1
ENSMUSG00000026019	249.986	0.888	0.347846	-2.55285	0.0106844	0.0596924	Wdr12
ENSMUSG00000022710	511.19	0.887566	0.353915	-2.50785	0.0121467	0.0655879	Usp7
ENSMUSG00000040374	1440.4	0.886899	0.323714	-2.73976	0.00614844	0.0397288	Pex2
ENSMUSG00000107092	12.2738	0.886357	0.726417	-1.22018	0.222398	0.451716	Gm7993
ENSMUSG00000064032	960.113	0.886324	0.312371	-2.83741	0.00454815	0.0315847	Gm10143
ENSMUSG00000015947	11896.8	0.886166	0.284878	-3.11068	0.00186656	0.0159094	Fcgr1
ENSMUSG00000071661	73.3555	0.886082	0.467506	-1.89534	0.0580473	0.194123	Zbtb3
ENSMUSG00000030670	69.6018	0.885983	0.517632	-1.71161	0.0869688	0.252128	Cyp2r1
ENSMUSG00000069910	69.2975	0.885586	0.490156	-1.80674	0.0708024	0.220653	Spdl1
ENSMUSG00000093862	26.0389	0.885506	0.621574	-1.42462	0.154267	0.361021	Gm5117
ENSMUSG00000003559	242.402	0.8855	0.385663	-2.29605	0.0216733	0.0987259	As3mt
ENSMUSG00000106755	458.804	0.885191	0.36177	-2.44684	0.0144116	0.0738352	Tpi-rs11
ENSMUSG00000030986	546.906	0.884556	0.322995	-2.7386	0.00617011	0.0398339	Dhx32
ENSMUSG00000026239	709.05	0.883477	0.311318	-2.83786	0.00454166	0.0315648	Pde6d
ENSMUSG00000103094	50.5432	0.88243	0.56017	-1.57529	0.11519	0.30096	Gm37558
ENSMUSG00000081665	220.63	0.882219	0.375271	-2.35089	0.0187287	0.089259	Gm15922
ENSMUSG00000059343	221.303	0.882002	0.394026	-2.23843	0.0251928	0.109282	Aldoart1
ENSMUSG00000049624	384.916	0.881897	0.350817	-2.51384	0.0119425	0.0648785	Slc17a5
ENSMUSG00000026342	697.753	0.880995	0.323155	-2.72623	0.00640628	0.0409575	Slc35f5
ENSMUSG00000106492	5.25116	0.880333	0.786134	-1.11983	0.262788	0.497026	Gm29707
ENSMUSG00000039887	179.133	0.879903	0.369111	-2.38384	0.0171329	0.0837351	Alg14
ENSMUSG00000028634	212.795	0.879719	0.365607	-2.40619	0.0161199	0.0802606	Hivep3
ENSMUSG00000030144	1326.25	0.879608	0.295301	-2.97869	0.00289487	0.0223247	Clec4d
ENSMUSG00000066233	104.475	0.879333	0.422388	-2.08182	0.0373592	0.14336	Tmem42
ENSMUSG00000020078	4442.01	0.879281	0.309348	-2.84237	0.00447794	0.0311829	Vps26a
ENSMUSG00000021671	259.117	0.87923	0.373335	-2.35507	0.0185192	0.0888478	Poc5
ENSMUSG00000021997	8.00051	0.878531	0.767187	-1.14513	0.252155	0.484293	Lrrc63
ENSMUSG00000040270	39.4044	0.878413	0.609572	-1.44103	0.149576	0.354115	Bach2
ENSMUSG00000035443	294.472	0.878391	0.369596	-2.37662	0.0174719	0.0848714	Thyn1
ENSMUSG00000042333	109.917	0.87794	0.514485	-1.70644	0.0879254	0.253289	Tnfrsf14
ENSMUSG00000022828	249.231	0.877781	0.393619	-2.23003	0.0257456	0.110839	Gtf2e1
ENSMUSG00000034707	1753.87	0.877777	0.423303	-2.07364	0.0381129	0.145222	Gns
ENSMUSG00000022667	307.347	0.877613	0.357893	-2.45217	0.0141999	0.0731038	Cd200r1
ENSMUSG00000084067	1051.37	0.876685	0.305299	-2.87157	0.00408444	0.0291971	Gm14269
ENSMUSG00000029553	252.822	0.876544	0.415619	-2.10901	0.0349439	0.136937	Tfec
ENSMUSG00000109045	6.74296	0.875904	0.783706	-1.11764	0.263719	0.498103	RP23-213H1.1
ENSMUSG00000044231	5.87625	0.875402	0.766432	-1.14218	0.25338	0.485653	Nhlrc1
ENSMUSG00000087119	193	0.875296	0.372818	-2.34778	0.0188855	0.089736	Atg4a-ps
ENSMUSG00000052446	1979.49	0.874957	0.328426	-2.66409	0.00771969	0.0468439	Zfp961
ENSMUSG00000000693	708.687	0.87491	0.344296	-2.54116	0.0110486	0.0611856	Loxl3
ENSMUSG00000044018	464.106	0.873755	0.320037	-2.73017	0.00633016	0.0405741	Mrpl50
ENSMUSG00000007891	25667.2	0.873481	0.279418	-3.12607	0.00177159	0.0153153	Ctsd
ENSMUSG00000028869	913.849	0.873462	0.309024	-2.82652	0.00470564	0.0324552	Gnl2
ENSMUSG00000084020	7.98436	0.87342	0.769521	-1.13502	0.256368	0.488913	Wsb2-ps
ENSMUSG00000026499	180.917	0.872836	0.378057	-2.30874	0.020958	0.0964248	Acbd3
ENSMUSG00000028107	819.369	0.872685	0.309229	-2.82213	0.00477056	0.0327093	Tars2
ENSMUSG00000024253	35.5826	0.872647	0.597731	-1.45993	0.144309	0.346808	Dync2li1
ENSMUSG00000050533	148.613	0.872647	0.39268	-2.22228	0.0262641	0.112531	Gm9845
ENSMUSG00000031969	596.614	0.872548	0.319383	-2.73198	0.00629553	0.0404114	Acad8
ENSMUSG00000032579	108.452	0.872122	0.420127	-2.07585	0.0379075	0.144821	Hemk1
ENSMUSG00000081451	65.8162	0.871967	0.500764	-1.74127	0.0816354	0.242299	Gm12734
ENSMUSG00000028567	763.348	0.871944	0.311793	-2.79655	0.00516518	0.0345547	Txndc12
ENSMUSG00000107012	28.6626	0.871884	0.619628	-1.40711	0.159395	0.369087	4930528J11Rik
ENSMUSG00000050914	97.5726	0.871864	0.436609	-1.9969	0.0458361	0.16544	Ankrd37
ENSMUSG00000062070	258.839	0.871817	0.347799	-2.50667	0.0121875	0.0657143	Pgk1
ENSMUSG00000026177	4417.67	0.87163	0.319388	-2.72906	0.00635144	0.0406721	Slc11a1
ENSMUSG00000000934	74.1542	0.870882	0.471837	-1.84573	0.064932	0.209427	Top1mt
ENSMUSG00000056666	189.368	0.870171	0.384397	-2.26373	0.0235907	0.104475	Retsat
ENSMUSG00000003604	9.59485	0.869909	0.762581	-1.14074	0.253977	0.486139	Aven
ENSMUSG00000097815	64.6633	0.869276	0.497137	-1.74856	0.0803663	0.239565	Gm26809
ENSMUSG00000030084	153.803	0.868869	0.404744	-2.14671	0.0318163	0.12847	Plxna1
ENSMUSG00000034538	17.7034	0.868752	0.675374	-1.28633	0.198329	0.420642	Zfp418
ENSMUSG00000074576	8.69331	0.86839	0.763729	-1.13704	0.255522	0.488099	Mocs3
ENSMUSG00000005677	306.531	0.868349	0.337179	-2.57533	0.0100144	0.0570216	Nr1i3
ENSMUSG00000008373	1147.71	0.868169	0.296468	-2.92837	0.00340743	0.0253482	Prpf31
ENSMUSG00000025421	493.629	0.867652	0.315567	-2.7495	0.00596865	0.0387822	Hdhd2
ENSMUSG00000021476	11.7137	0.867638	0.742292	-1.16886	0.242459	0.473738	Habp4
ENSMUSG00000041870	314.688	0.867352	0.346828	-2.50081	0.012391	0.0665273	Ankrd13a
ENSMUSG00000051502	13.7079	0.866903	0.720042	-1.20396	0.228604	0.459697	Ufsp1
ENSMUSG00000020321	3318.02	0.866737	0.294738	-2.9407	0.00327471	0.0245295	Mdh1
ENSMUSG00000066026	2116.93	0.866398	0.299321	-2.89455	0.00379706	0.0275836	Dhrs3
ENSMUSG00000014075	466.085	0.866001	0.32475	-2.66667	0.00766077	0.0466282	Tctex1d2
ENSMUSG00000014177	504.74	0.865805	0.345153	-2.50847	0.0121257	0.0654976	Tvp23b
ENSMUSG00000035376	195.847	0.865779	0.381354	-2.27028	0.0231908	0.103308	Hacd2
ENSMUSG00000081817	5.75039	0.865511	0.78198	-1.10682	0.268372	0.502504	Gm13590
ENSMUSG00000039206	2735.92	0.865115	0.301312	-2.87117	0.00408961	0.0292001	Daglb
ENSMUSG00000028657	8451.58	0.863561	0.288514	-2.99313	0.00276129	0.0215691	Ppt1
ENSMUSG00000032314	1407.68	0.863486	0.321437	-2.68633	0.00722425	0.0447519	Etfa
ENSMUSG00000034488	27.9917	0.862694	0.606806	-1.4217	0.155115	0.362557	Edil3
ENSMUSG00000015829	5.13587	0.862656	0.786097	-1.09739	0.27247	0.507481	Tnr
ENSMUSG00000107283	335.958	0.861851	0.344965	-2.49837	0.0124766	0.0666984	Mpv17
ENSMUSG00000098234	48.1246	0.861605	0.540568	-1.59389	0.110961	0.294174	Snhg6
ENSMUSG00000108291	74.5815	0.861569	0.470767	-1.83014	0.0672295	0.21428	Gm44292
ENSMUSG00000028394	374.095	0.861458	0.343243	-2.50976	0.0120814	0.0653517	Pole3
ENSMUSG00000027173	170.203	0.861421	0.393659	-2.18824	0.0286519	0.119846	Depdc7
ENSMUSG00000060470	12.7971	0.861219	0.724632	-1.18849	0.23464	0.46537	Adgrg3
ENSMUSG00000001687	1421.34	0.860909	0.367013	-2.34572	0.0189906	0.0899917	Ubl3
ENSMUSG00000098292	10.8825	0.860528	0.743688	-1.15711	0.247228	0.47896	Gm27194
ENSMUSG00000031875	2788.97	0.86026	0.291934	-2.94676	0.0032112	0.0241614	Cmtm3
ENSMUSG00000106104	6.16191	0.86025	0.785702	-1.09488	0.273569	0.508509	Gm42660
ENSMUSG00000055013	49.5795	0.859614	0.560028	-1.53495	0.124797	0.314923	Agap1
ENSMUSG00000058756	46.1211	0.85959	0.558563	-1.53893	0.123821	0.313349	Thra
ENSMUSG00000095325	96.6734	0.858884	0.449555	-1.91052	0.0560662	0.189634	Zfp870
ENSMUSG00000025059	1746.46	0.858849	0.329552	-2.60611	0.00915773	0.0532858	Gk
ENSMUSG00000097358	160.218	0.858714	0.430704	-1.99375	0.0461796	0.166176	Gm26773
ENSMUSG00000052676	79.2963	0.858625	0.458453	-1.87287	0.0610857	0.201262	Zmat1
ENSMUSG00000104347	6.54455	0.858253	0.781416	-1.09833	0.272061	0.506954	Gm37689
ENSMUSG00000032905	775.133	0.858042	0.339343	-2.52854	0.0114538	0.0628647	Atg12
ENSMUSG00000018999	1158.68	0.85803	0.317042	-2.70636	0.0068025	0.0428402	Slc35b4
ENSMUSG00000097828	157.881	0.857579	0.38175	-2.24644	0.0246756	0.10792	6430562O15Rik
ENSMUSG00000078495	473.401	0.857566	0.365447	-2.34662	0.0189445	0.0899194	Gm13157
ENSMUSG00000083046	31.1815	0.857561	0.621195	-1.3805	0.167432	0.380427	Gm14699
ENSMUSG00000047084	241.489	0.857045	0.364411	-2.35187	0.0186795	0.089193	Ngrn
ENSMUSG00000020328	321.106	0.856623	0.346542	-2.47192	0.0134389	0.0702853	Nudcd2
ENSMUSG00000032046	2746.25	0.855633	0.373851	-2.2887	0.0220968	0.100023	Abhd12
ENSMUSG00000069727	28.3481	0.855593	0.670556	-1.27595	0.201975	0.424958	Gm5595
ENSMUSG00000087282	11.3792	0.855572	0.741438	-1.15394	0.248526	0.480399	Gm15317
ENSMUSG00000028411	437.976	0.855202	0.331157	-2.58247	0.00980969	0.0562368	Aptx
ENSMUSG00000034951	543.41	0.855086	0.316692	-2.70006	0.00693275	0.0434355	Cog7
ENSMUSG00000035329	56.0705	0.854641	0.517036	-1.65296	0.098339	0.272492	Fbxo33
ENSMUSG00000048007	17.6665	0.854183	0.677978	-1.2599	0.207706	0.432488	Timm8a1
ENSMUSG00000021610	173.761	0.854032	0.423061	-2.0187	0.0435189	0.159713	Clptm1l
ENSMUSG00000097051	8.16767	0.85366	0.779944	-1.09451	0.273729	0.508575	Gm26836
ENSMUSG00000059423	70.8606	0.853458	0.471895	-1.80858	0.0705168	0.220216	Zfp933
ENSMUSG00000050350	1727.25	0.853343	0.292439	-2.91802	0.00352263	0.0260135	Gpr18
ENSMUSG00000015568	475.51	0.853079	0.337407	-2.52834	0.0114604	0.0628684	Lpl
ENSMUSG00000103137	11.2951	0.852961	0.736308	-1.15843	0.246689	0.478293	Gm37981
ENSMUSG00000028639	281.402	0.852682	0.340954	-2.50087	0.0123888	0.0665273	Ybx1
ENSMUSG00000025350	10.9989	0.852248	0.7496	-1.13694	0.255564	0.48811	Rdh5
ENSMUSG00000031917	425.256	0.852193	0.321126	-2.65377	0.00795987	0.0479746	Nip7
ENSMUSG00000066838	43.2427	0.8517	0.533262	-1.59715	0.110232	0.292774	Zfp772
ENSMUSG00000052656	57.3777	0.851537	0.522487	-1.62978	0.103149	0.280736	Rnf103
ENSMUSG00000079242	140.546	0.851223	0.421761	-2.01826	0.0435642	0.159819	C730034F03Rik
ENSMUSG00000057497	286.666	0.850477	0.342458	-2.48345	0.0130117	0.0686435	Fam136a
ENSMUSG00000039756	1471.02	0.850393	0.303359	-2.80326	0.00505893	0.0340394	Dnttip2
ENSMUSG00000026575	131.691	0.850026	0.445163	-1.90947	0.0562014	0.189921	Nme7
ENSMUSG00000028189	340.731	0.849995	0.365119	-2.32799	0.0199124	0.0932282	Ctbs
ENSMUSG00000004359	496.58	0.84994	0.372495	-2.28175	0.0225044	0.101295	Spic
ENSMUSG00000031349	284.392	0.849456	0.370583	-2.29222	0.0218932	0.0992797	Nsdhl
ENSMUSG00000052298	5396.71	0.849375	0.300121	-2.83011	0.00465327	0.0321379	Cdc42se2
ENSMUSG00000044408	1016.01	0.849169	0.333476	-2.54642	0.0108834	0.0604697	Sptssa
ENSMUSG00000086119	5.79754	0.848413	0.785021	-1.08075	0.279807	0.514191	Gm2415
ENSMUSG00000056904	32.432	0.848385	0.617784	-1.37327	0.169668	0.383616	Gm5620
ENSMUSG00000106664	55.8192	0.847876	0.502423	-1.68757	0.0914929	0.25997	Gm17936
ENSMUSG00000025133	812.828	0.847181	0.328613	-2.57805	0.00993598	0.0566613	Ints4
ENSMUSG00000051890	59.1866	0.846978	0.502627	-1.6851	0.0919691	0.260825	Klhdc1
ENSMUSG00000086968	8.40981	0.84683	0.780575	-1.08488	0.277975	0.512866	4933431E20Rik
ENSMUSG00000036435	1050.09	0.84663	0.312131	-2.71242	0.00667947	0.0423269	Exoc1
ENSMUSG00000109291	38.6856	0.84649	0.713683	-1.18609	0.235588	0.466215	RP23-366O14.5
ENSMUSG00000081453	19.8441	0.846457	0.682988	-1.23934	0.215218	0.442712	Gm6767
ENSMUSG00000040253	6412.42	0.846212	0.296577	-2.85327	0.00432723	0.0303568	Gbp7
ENSMUSG00000044377	61.9371	0.845686	0.496048	-1.70485	0.0882227	0.253646	Gm13080
ENSMUSG00000000131	448.99	0.84543	0.341473	-2.47583	0.0132925	0.0697363	Xpo6
ENSMUSG00000019916	1857.84	0.844856	0.319271	-2.6462	0.00814015	0.0488796	P4ha1
ENSMUSG00000028618	7083.67	0.84483	0.292773	-2.88562	0.00390649	0.0282154	Tmem59
ENSMUSG00000082762	76.276	0.843278	0.483739	-1.74325	0.08129	0.241605	Gm12366
ENSMUSG00000031399	610.01	0.843021	0.314032	-2.68451	0.00726367	0.0449043	Fam3a
ENSMUSG00000030264	793.797	0.842838	0.309838	-2.72025	0.00652327	0.0415307	Thumpd3
ENSMUSG00000087088	22.0872	0.842325	0.656415	-1.28322	0.199415	0.421952	Gm16638
ENSMUSG00000082045	23.1697	0.842021	0.661394	-1.2731	0.202983	0.426168	Gm11585
ENSMUSG00000001416	1443.22	0.842005	0.303482	-2.77448	0.00552902	0.0365688	Cct3
ENSMUSG00000027342	446.944	0.84091	0.355444	-2.3658	0.017991	0.0867806	Pcna
ENSMUSG00000052459	4524.47	0.839886	0.315531	-2.66182	0.00777204	0.0470673	Atp6v1a
ENSMUSG00000029276	166.596	0.83929	0.414449	-2.02508	0.0428595	0.157901	Glmn
ENSMUSG00000048621	803.015	0.839268	0.370491	-2.26529	0.023495	0.104234	Gm6377
ENSMUSG00000001418	4591.17	0.839006	0.296152	-2.83302	0.00461103	0.0319067	Glmp
ENSMUSG00000039703	215.698	0.838783	0.362354	-2.31481	0.0206231	0.0955776	Nploc4
ENSMUSG00000044339	61.7328	0.837916	0.495935	-1.68957	0.0911106	0.259372	Alkbh2
ENSMUSG00000028268	5364.15	0.837801	0.318298	-2.63213	0.00848511	0.050418	Gbp3
ENSMUSG00000056418	47.1804	0.837597	0.580468	-1.44297	0.149029	0.353313	BC043934
ENSMUSG00000024474	2265.28	0.837017	0.307742	-2.71987	0.00653084	0.0415439	Ik
ENSMUSG00000023030	692.639	0.836867	0.356894	-2.34486	0.019034	0.0900902	Slc11a2
ENSMUSG00000030960	296.702	0.836836	0.342976	-2.43993	0.0146902	0.0748646	Mettl10
ENSMUSG00000104802	13.2663	0.836535	0.719467	-1.16271	0.244945	0.476306	Gm5869
ENSMUSG00000026489	199.981	0.836315	0.445293	-1.87812	0.0603645	0.199437	Adck3
ENSMUSG00000041623	268.112	0.835788	0.356943	-2.34152	0.0192054	0.0906467	D11Wsu47e
ENSMUSG00000018796	879.136	0.835016	0.313004	-2.66775	0.00763606	0.0465229	Acsl1
ENSMUSG00000026377	426.984	0.834682	0.320748	-2.6023	0.0092602	0.0537787	Nifk
ENSMUSG00000103284	11.2432	0.834648	0.734768	-1.13593	0.255985	0.48849	3110080O07Rik
ENSMUSG00000095028	661.706	0.834003	0.317614	-2.62584	0.00864365	0.0509825	Sirpb1b
ENSMUSG00000033970	280.381	0.833031	0.340184	-2.44877	0.0143346	0.0735455	Rfc3
ENSMUSG00000027424	365.896	0.832415	0.348839	-2.38624	0.0170215	0.0834479	Mgme1
ENSMUSG00000022426	46.9225	0.831811	0.550396	-1.5113	0.130713	0.325515	Josd1
ENSMUSG00000084915	16.5539	0.831769	0.686746	-1.21117	0.225829	0.456358	C230037L18Rik
ENSMUSG00000032456	70.4107	0.831059	0.514963	-1.61382	0.106566	0.286292	Nmnat3
ENSMUSG00000081378	8.66807	0.830719	0.786	-1.05689	0.29056	0.525757	Rps13-ps4
ENSMUSG00000085242	129.016	0.830507	0.414404	-2.0041	0.0450596	0.163741	Gm11537
ENSMUSG00000022947	151.023	0.830295	0.390835	-2.12441	0.0336356	0.133647	Cbr3
ENSMUSG00000025743	1509.9	0.830038	0.33619	-2.46895	0.0135509	0.0706428	Sdc3
ENSMUSG00000093668	12.6957	0.829815	0.738994	-1.1229	0.261481	0.495172	Pou5f2
ENSMUSG00000055900	83.8024	0.82971	0.463583	-1.78978	0.07349	0.226144	Tmem69
ENSMUSG00000092193	19.8335	0.828966	0.656087	-1.2635	0.20641	0.430736	Cd9-ps
ENSMUSG00000105962	7.8541	0.828477	0.773387	-1.07123	0.284065	0.51843	Gm42432
ENSMUSG00000006205	23.2122	0.828318	0.640241	-1.29376	0.195749	0.41743	Htra1
ENSMUSG00000028292	500.625	0.827912	0.321694	-2.5736	0.0100646	0.0572214	Rars2
ENSMUSG00000086156	246.809	0.827209	0.414092	-1.99765	0.0457551	0.165356	Gm15354
ENSMUSG00000020876	705.551	0.826854	0.323571	-2.5554	0.0106065	0.0593665	Snx11
ENSMUSG00000019864	289.377	0.826665	0.342364	-2.41458	0.0157533	0.0790062	Rtn4ip1
ENSMUSG00000069515	958.697	0.826646	0.430276	-1.9212	0.0547062	0.186072	Lyz1
ENSMUSG00000025372	239.541	0.826631	0.386115	-2.14089	0.0322827	0.130006	Baiap2
ENSMUSG00000035186	19.8763	0.82658	0.694429	-1.1903	0.233928	0.464726	Ubd
ENSMUSG00000090192	7.81486	0.826563	0.774456	-1.06728	0.285844	0.520362	Gm16556
ENSMUSG00000052395	318.332	0.826432	0.340471	-2.42732	0.0152109	0.0770002	Rft1
ENSMUSG00000022130	482.714	0.8263	0.325905	-2.5354	0.0112319	0.0619515	Tgds
ENSMUSG00000007338	499.319	0.825736	0.324505	-2.5446	0.0109402	0.0606959	Mrpl49
ENSMUSG00000028933	33.9455	0.825605	0.584521	-1.41245	0.157818	0.366609	Xrcc2
ENSMUSG00000062627	1589.58	0.825587	0.303598	-2.71934	0.0065412	0.0415924	Mysm1
ENSMUSG00000026111	837.59	0.825491	0.334533	-2.46759	0.0136026	0.0708476	Unc50
ENSMUSG00000022898	1793.83	0.825209	0.314193	-2.62644	0.00862831	0.0509387	Dscr3
ENSMUSG00000050107	122.811	0.824647	0.456686	-1.80572	0.0709623	0.220924	Gsg2
ENSMUSG00000021494	2266.36	0.824103	0.287641	-2.86504	0.00416962	0.0295108	Ddx41
ENSMUSG00000031015	2061.2	0.824029	0.309899	-2.65903	0.00783662	0.0473311	Swap70
ENSMUSG00000079427	817.782	0.823415	0.340621	-2.41739	0.0156323	0.0786338	Mthfsl
ENSMUSG00000043542	147.314	0.823102	0.389448	-2.11351	0.0345572	0.135914	Zc2hc1a
ENSMUSG00000035473	314.191	0.822848	0.350527	-2.34746	0.018902	0.0897457	Galm
ENSMUSG00000030257	89.2421	0.821977	0.452502	-1.81651	0.0692915	0.218098	Srgap3
ENSMUSG00000027384	102.07	0.821693	0.419573	-1.9584	0.0501826	0.175559	Ndufaf5
ENSMUSG00000028093	448.47	0.82146	0.330461	-2.4858	0.012926	0.0683104	Acp6
ENSMUSG00000026032	387.683	0.821418	0.332201	-2.47265	0.0134114	0.07019	Ndufb3
ENSMUSG00000024186	32.8538	0.821176	0.634835	-1.29353	0.195829	0.41743	Rgs11
ENSMUSG00000031774	1421.73	0.8209	0.293396	-2.79793	0.00514318	0.0344837	Fam192a
ENSMUSG00000022139	2382.91	0.820894	0.295643	-2.77664	0.0054924	0.0363742	Mbnl2
ENSMUSG00000042642	1190.68	0.820886	0.29841	-2.75087	0.00594377	0.0386703	Flad1
ENSMUSG00000086916	5.71338	0.820667	0.785364	-1.04495	0.296046	0.532531	Gm15903
ENSMUSG00000022766	6.37622	0.820242	0.781307	-1.04983	0.293795	0.529487	Serpind1
ENSMUSG00000018171	3988.06	0.82021	0.291168	-2.81697	0.00484794	0.0330752	Vmp1
ENSMUSG00000029175	1661.42	0.820148	0.30271	-2.70935	0.00674147	0.0425975	Slc35f6
ENSMUSG00000074419	261.619	0.820046	0.37416	-2.1917	0.028401	0.11911	Gm15448
ENSMUSG00000090258	96.7455	0.819537	0.4478	-1.83014	0.0672292	0.21428	Churc1
ENSMUSG00000085058	19.7643	0.819312	0.659813	-1.24173	0.214335	0.441556	8030453O22Rik
ENSMUSG00000072969	85.7192	0.819109	0.439422	-1.86406	0.0623134	0.2038	Armcx5
ENSMUSG00000085977	61.0249	0.819019	0.486046	-1.68507	0.091976	0.260825	Gm5970
ENSMUSG00000028886	285.141	0.818956	0.361005	-2.26855	0.0232958	0.103593	Eya3
ENSMUSG00000078877	13.4162	0.818819	0.724866	-1.12962	0.258638	0.491719	Gm14295
ENSMUSG00000030327	1047.6	0.818598	0.318166	-2.57286	0.0100862	0.0573014	Necap1
ENSMUSG00000072693	37.1445	0.818556	0.55232	-1.48203	0.138332	0.338093	Gm10401
ENSMUSG00000037017	320.159	0.818481	0.336543	-2.43203	0.0150146	0.0761589	Zscan21
ENSMUSG00000097333	370.403	0.818403	0.372171	-2.199	0.0278778	0.117484	Zfp87
ENSMUSG00000058486	330.152	0.818146	0.363729	-2.24933	0.0244916	0.107335	Wdr91
ENSMUSG00000048031	292.271	0.817871	0.411228	-1.98885	0.0467177	0.167318	Fcrl5
ENSMUSG00000045658	6564.43	0.81756	0.302852	-2.69953	0.00694368	0.0434582	Pid1
ENSMUSG00000086894	25.9432	0.817488	0.614375	-1.3306	0.18332	0.401603	Gm15708
ENSMUSG00000028187	668.325	0.817409	0.309834	-2.63822	0.00833434	0.049776	Rpf1
ENSMUSG00000023147	193.149	0.817373	0.369817	-2.21021	0.0270906	0.114963	Wrb
ENSMUSG00000085622	47.7383	0.817274	0.514795	-1.58757	0.112383	0.296585	3110056K07Rik
ENSMUSG00000023892	338.043	0.816874	0.361816	-2.2577	0.0239641	0.105665	Zfp51
ENSMUSG00000034758	45.4179	0.816263	0.531005	-1.53721	0.124243	0.314089	Tle6
ENSMUSG00000055660	147.922	0.816029	0.401468	-2.03261	0.0420915	0.156063	Mettl4
ENSMUSG00000024587	4998.15	0.815653	0.290194	-2.81071	0.00494316	0.0335435	Nars
ENSMUSG00000087008	268.116	0.815011	0.382629	-2.13003	0.0331693	0.132482	Gm5530
ENSMUSG00000022684	889.5	0.814738	0.312239	-2.60934	0.00907172	0.0528683	Bfar
ENSMUSG00000085174	43.0085	0.814622	0.539098	-1.51108	0.130767	0.325543	Gm16206
ENSMUSG00000003814	9147.8	0.814556	0.309562	-2.63132	0.00850547	0.0504993	Calr
ENSMUSG00000030214	21742.9	0.814156	0.30595	-2.66108	0.0077891	0.0471329	Plbd1
ENSMUSG00000032939	690.427	0.813864	0.307585	-2.64598	0.00814553	0.0488796	Nup93
ENSMUSG00000026879	8690.18	0.813574	0.282265	-2.8823	0.00394781	0.0284325	Gsn
ENSMUSG00000016257	1408.93	0.813109	0.294438	-2.76156	0.00575263	0.0377828	Slmo2
ENSMUSG00000035868	76.9098	0.81291	0.488886	-1.66278	0.0963564	0.269265	3110052M02Rik
ENSMUSG00000105124	59.2693	0.812888	0.490512	-1.65722	0.0974743	0.271517	Gm5297
ENSMUSG00000057924	14.4386	0.812779	0.701304	-1.15895	0.246475	0.478175	Gm10033
ENSMUSG00000021218	9920.69	0.812552	0.322385	-2.52044	0.0117208	0.0639725	Gdi2
ENSMUSG00000004393	961.568	0.81217	0.320029	-2.5378	0.011155	0.0616397	Ddx56
ENSMUSG00000035299	60.3796	0.812156	0.550456	-1.47542	0.140099	0.340655	Mid1
ENSMUSG00000090608	57.0997	0.812089	0.537792	-1.51004	0.131032	0.325828	Gm17200
ENSMUSG00000092354	45.5722	0.812013	0.528425	-1.53667	0.124375	0.314173	Gm20548
ENSMUSG00000033096	541.004	0.811919	0.352227	-2.3051	0.021161	0.0971225	Apmap
ENSMUSG00000084936	106.597	0.811832	0.424063	-1.91441	0.0555675	0.188494	Gm11583
ENSMUSG00000097083	47.0618	0.811812	0.541599	-1.49892	0.133895	0.330828	D930019O06Rik
ENSMUSG00000091160	30.5507	0.811735	0.611675	-1.32707	0.184486	0.402733	Gm17133
ENSMUSG00000109448	30.3766	0.811332	0.584155	-1.3889	0.164864	0.376834	RP24-137M22.3
ENSMUSG00000101862	10.3336	0.810012	0.742589	-1.09079	0.275363	0.510297	Gm8918
ENSMUSG00000022305	66.7252	0.809602	0.493888	-1.63924	0.101163	0.277172	Lrp12
ENSMUSG00000090213	168.575	0.80956	0.381871	-2.11998	0.0340075	0.13452	Tmem189
ENSMUSG00000081933	77.2763	0.80946	0.460244	-1.75876	0.0786175	0.236211	Gm14767
ENSMUSG00000104406	26.8169	0.808827	0.678535	-1.19202	0.233254	0.464057	Gm38014
ENSMUSG00000015733	17093.3	0.808812	0.308747	-2.61966	0.00880187	0.0516518	Capza2
ENSMUSG00000033721	243.381	0.808684	0.368985	-2.19164	0.0284052	0.11911	Vav3
ENSMUSG00000057835	126.878	0.808456	0.41828	-1.93281	0.0532593	0.182629	Zfp119a
ENSMUSG00000028556	172.689	0.808029	0.383977	-2.10437	0.0353462	0.138085	Dock7
ENSMUSG00000074781	742.559	0.80801	0.319367	-2.53004	0.011405	0.0627381	Ube2n
ENSMUSG00000078154	10.0421	0.807794	0.764304	-1.0569	0.290556	0.525757	Gm12184
ENSMUSG00000008730	603.884	0.807762	0.344675	-2.34355	0.0191014	0.0902974	Hipk1
ENSMUSG00000045100	39.3278	0.80775	0.590334	-1.36829	0.17122	0.385478	Slc25a26
ENSMUSG00000082675	216.491	0.807469	0.37429	-2.15733	0.0309798	0.126033	Gm6382
ENSMUSG00000014686	46.0347	0.807405	0.581117	-1.3894	0.164711	0.376834	Ceacam16
ENSMUSG00000040151	53.6682	0.807164	0.558482	-1.44528	0.148379	0.352635	Hs2st1
ENSMUSG00000036908	25174	0.807163	0.299669	-2.69351	0.00707032	0.0439963	Unc93b1
ENSMUSG00000031422	1256.1	0.806886	0.316051	-2.55302	0.0106793	0.0596858	Morf4l2
ENSMUSG00000020706	819.963	0.806847	0.304032	-2.65382	0.00795868	0.0479746	Ftsj3
ENSMUSG00000066551	758.854	0.80673	0.311568	-2.58926	0.00961823	0.0554329	Hmgb1
ENSMUSG00000034620	371.242	0.806283	0.342092	-2.35692	0.0184274	0.0885642	Tmem5
ENSMUSG00000039716	5.43018	0.806206	0.736352	-1.09487	0.273576	0.508509	Dock3
ENSMUSG00000021418	35.1363	0.806005	0.573353	-1.40577	0.159791	0.369552	Rpp40
ENSMUSG00000098825	6.3912	0.805991	0.78349	-1.02872	0.303612	0.539541	Gm27285
ENSMUSG00000022219	22.9113	0.805792	0.64364	-1.25193	0.210596	0.436465	Cideb
ENSMUSG00000024287	876.665	0.805553	0.324639	-2.48138	0.0130874	0.0689467	Thoc1
ENSMUSG00000099492	103.35	0.805192	0.433493	-1.85745	0.0632468	0.205615	Gm5525
ENSMUSG00000032633	1687.34	0.804935	0.324791	-2.47832	0.0132003	0.0693744	Flcn
ENSMUSG00000067591	26.0135	0.804923	0.630062	-1.27753	0.201415	0.424939	Klra3
ENSMUSG00000089672	4764.56	0.804871	0.334283	-2.40776	0.0160509	0.0800221	Lilr4b
ENSMUSG00000046334	33.7265	0.804856	0.611137	-1.31698	0.187845	0.406733	Gm6195
ENSMUSG00000086184	7.17051	0.804693	0.779617	-1.03216	0.301995	0.537804	Gm12764
ENSMUSG00000104823	8.50079	0.804335	0.772289	-1.04149	0.297646	0.533934	Gm43182
ENSMUSG00000091512	685.086	0.804103	0.315243	-2.55074	0.0107495	0.0600338	Lamtor3
ENSMUSG00000067344	450.686	0.803977	0.346642	-2.31933	0.0203773	0.0947312	Rps25-ps1
ENSMUSG00000019832	4621.48	0.803727	0.320039	-2.51134	0.0120272	0.0651605	Rab32
ENSMUSG00000093622	21.278	0.803452	0.656913	-1.22307	0.221302	0.450698	Gm20703
ENSMUSG00000073650	10.1827	0.802999	0.766021	-1.04827	0.294513	0.53053	Catip
ENSMUSG00000059447	194.706	0.802923	0.395707	-2.02908	0.0424497	0.156946	Hadhb
ENSMUSG00000030402	25.8202	0.802382	0.689132	-1.16434	0.244287	0.475698	Ppm1n
ENSMUSG00000032478	101.611	0.802293	0.506331	-1.58452	0.113075	0.297488	Nme6
ENSMUSG00000026975	144.336	0.802196	0.393367	-2.03931	0.0414195	0.154365	Dph7
ENSMUSG00000019804	3674.41	0.802152	0.291444	-2.75234	0.00591715	0.0385497	Snx3
ENSMUSG00000106803	32.8619	0.80213	0.577474	-1.38903	0.164823	0.376834	Gm8930
ENSMUSG00000074149	95.193	0.801821	0.462725	-1.73282	0.0831271	0.245113	Gm10634
ENSMUSG00000034940	117.388	0.80045	0.410432	-1.95026	0.0511451	0.177671	Synrg
ENSMUSG00000030493	287.592	0.800083	0.34119	-2.34498	0.0190282	0.0900902	Faap24
ENSMUSG00000081603	453.308	0.799895	0.357328	-2.23855	0.0251855	0.109282	Gm14681
ENSMUSG00000027305	294.868	0.799654	0.34908	-2.29075	0.021978	0.099575	Ndufaf1
ENSMUSG00000060730	4.90529	0.799143	0.786131	-1.01655	0.309367	0.545857	Gm10086
ENSMUSG00000021120	348.093	0.799096	0.330097	-2.42079	0.0154868	0.0780835	Pigh
ENSMUSG00000018774	22921.3	0.798929	0.368328	-2.16907	0.0300773	0.123724	Cd68
ENSMUSG00000047115	17.5625	0.798908	0.676891	-1.18026	0.237896	0.468983	Fam221a
ENSMUSG00000060716	109.228	0.798565	0.426363	-1.87297	0.0610723	0.201262	Plekhh1
ENSMUSG00000024997	773.452	0.798517	0.338134	-2.36154	0.0181991	0.087645	Prdx3
ENSMUSG00000015702	79.7063	0.798063	0.510875	-1.56215	0.118252	0.305275	Anxa9
ENSMUSG00000023861	103.021	0.797741	0.464197	-1.71854	0.0856979	0.249861	Mpc1
ENSMUSG00000030613	210.108	0.797374	0.391828	-2.03501	0.0418498	0.155357	Ccdc90b
ENSMUSG00000083669	612.68	0.797144	0.329721	-2.41763	0.0156218	0.0786072	Gm10169
ENSMUSG00000078122	90.7276	0.797046	0.466668	-1.70795	0.0876456	0.253209	F630028O10Rik
ENSMUSG00000033386	839.648	0.796776	0.34884	-2.28407	0.0223673	0.100891	Frrs1
ENSMUSG00000098098	29.1158	0.796615	0.671651	-1.18605	0.235601	0.466215	Bvht
ENSMUSG00000020677	742.269	0.796335	0.322283	-2.47092	0.0134766	0.0703639	Ddx52
ENSMUSG00000030346	50.8912	0.796107	0.594455	-1.33922	0.180499	0.39817	Rad51ap1
ENSMUSG00000049477	203.775	0.79578	0.400839	-1.98528	0.0471128	0.168414	Gm8508
ENSMUSG00000013701	163.639	0.795594	0.385225	-2.06527	0.0388972	0.147101	Timm23
ENSMUSG00000024981	3590.99	0.795557	0.312482	-2.54593	0.0108988	0.0605141	Acsl5
ENSMUSG00000106959	44.2026	0.795525	0.582407	-1.36593	0.171962	0.386717	Gm42548
ENSMUSG00000024759	329.968	0.794851	0.38421	-2.06879	0.0385654	0.146357	Atl3
ENSMUSG00000037791	194.864	0.794665	0.373861	-2.12556	0.0335396	0.133471	Phf12
ENSMUSG00000006715	256.506	0.794508	0.359488	-2.21011	0.0270976	0.114963	Gmnn
ENSMUSG00000040528	1125.83	0.794371	0.297614	-2.66913	0.0076047	0.0463504	Milr1
ENSMUSG00000030982	2816.14	0.794359	0.294603	-2.69637	0.00700994	0.0437498	9030624J02Rik
ENSMUSG00000023074	399.774	0.794106	0.385262	-2.06121	0.0392831	0.14819	Mospd1
ENSMUSG00000102211	13.0103	0.79393	0.735023	-1.08014	0.280079	0.51444	Gm37490
ENSMUSG00000079317	180.705	0.793845	0.374077	-2.12214	0.0338257	0.134061	Trappc2
ENSMUSG00000021809	292.998	0.7933	0.352952	-2.24761	0.0246009	0.107689	Nudt13
ENSMUSG00000102153	66.091	0.79322	0.533801	-1.48598	0.137283	0.336564	Gm37474
ENSMUSG00000097318	20.3914	0.793113	0.660745	-1.20033	0.23001	0.460611	1700007L15Rik
ENSMUSG00000090100	9.57164	0.792997	0.750463	-1.05668	0.290659	0.525776	Ttbk2
ENSMUSG00000001786	604.803	0.79288	0.3143	-2.52269	0.0116463	0.0636802	Fbxo7
ENSMUSG00000096795	15.7262	0.792807	0.723041	-1.09649	0.272864	0.507825	Zfp433
ENSMUSG00000108518	46.432	0.792288	0.535322	-1.48002	0.138867	0.338856	RP23-457F4.3
ENSMUSG00000098851	4.98945	0.792144	0.785476	-1.00849	0.31322	0.549754	Mir6353
ENSMUSG00000026648	1003	0.792078	0.338167	-2.34227	0.0191669	0.0905211	Dclre1c
ENSMUSG00000086015	5.83101	0.792015	0.786024	-1.00762	0.313636	0.550189	4833417C18Rik
ENSMUSG00000031353	1300.86	0.791424	0.29896	-2.64726	0.00811467	0.0487524	Rbbp7
ENSMUSG00000010914	411.984	0.791372	0.322346	-2.45504	0.0140869	0.0727447	Pdhx
ENSMUSG00000021423	4949.31	0.790876	0.28592	-2.76608	0.0056735	0.037358	Ly86
ENSMUSG00000002679	377.444	0.790862	0.333224	-2.37336	0.017627	0.085433	Med6
ENSMUSG00000037375	27.5963	0.790214	0.640187	-1.23435	0.217073	0.444416	Hhat
ENSMUSG00000044145	20.3615	0.790147	0.656521	-1.20354	0.228769	0.459844	1810024B03Rik
ENSMUSG00000068923	552.282	0.789784	0.321205	-2.45881	0.0139397	0.0721567	Syt11
ENSMUSG00000022749	432.81	0.789664	0.348327	-2.26702	0.0233892	0.103917	Tbc1d23
ENSMUSG00000033983	162.126	0.789324	0.406429	-1.9421	0.0521255	0.179962	Coil
ENSMUSG00000025785	456.351	0.78849	0.354885	-2.22182	0.0262955	0.11257	Exosc7
ENSMUSG00000028331	121.221	0.788128	0.421907	-1.86801	0.06176	0.202778	Trmo
ENSMUSG00000015672	512.162	0.788062	0.315187	-2.5003	0.0124087	0.0665283	Mrpl32
ENSMUSG00000041733	561.717	0.787996	0.319437	-2.46683	0.0136316	0.0709744	Coq5
ENSMUSG00000020621	250.159	0.787911	0.361925	-2.177	0.0294805	0.122198	Rdh14
ENSMUSG00000041650	285.165	0.787849	0.356577	-2.20948	0.0271414	0.115101	Pcca
ENSMUSG00000089917	1260.67	0.786823	0.367383	-2.1417	0.032218	0.129815	Uckl1
ENSMUSG00000108393	193.002	0.786762	0.363753	-2.1629	0.0305488	0.124917	RP23-402A4.1
ENSMUSG00000063787	496.101	0.786291	0.351053	-2.23981	0.0251034	0.109055	Chchd1
ENSMUSG00000033540	1076.62	0.786234	0.329573	-2.38561	0.0170506	0.0834946	Idua
ENSMUSG00000036503	2577.57	0.786126	0.341385	-2.30276	0.0212926	0.0975787	Rnf13
ENSMUSG00000004018	297.58	0.785911	0.38027	-2.06672	0.0387607	0.146731	Fancl
ENSMUSG00000030545	54.1753	0.784936	0.513143	-1.52966	0.1261	0.317104	Pex11a
ENSMUSG00000027488	21.5095	0.784209	0.669956	-1.17054	0.241785	0.472883	Snta1
ENSMUSG00000020400	2335.95	0.783858	0.312133	-2.5113	0.0120288	0.0651605	Tnip1
ENSMUSG00000057396	21.6075	0.783396	0.68592	-1.14211	0.253408	0.485653	Zfp759
ENSMUSG00000097694	8.27708	0.783052	0.771278	-1.01526	0.30998	0.546433	G730013B05Rik
ENSMUSG00000029550	112.01	0.782801	0.409877	-1.90985	0.0561531	0.189819	Sppl3
ENSMUSG00000021178	2089.23	0.782589	0.293187	-2.66925	0.00760201	0.0463504	Psmc1
ENSMUSG00000040774	3250.1	0.782447	0.33114	-2.36289	0.018133	0.0873824	Cept1
ENSMUSG00000098055	16.7994	0.782198	0.692627	-1.12932	0.258762	0.491864	Gm26947
ENSMUSG00000097369	5.85293	0.782053	0.786041	-0.994926	0.319772	0.556506	Gm26545
ENSMUSG00000029518	81.9846	0.78167	0.505087	-1.54759	0.12172	0.309948	Rab35
ENSMUSG00000056116	3634.46	0.78164	0.308831	-2.53097	0.0113749	0.062626	H2-T22
ENSMUSG00000025314	941.114	0.781583	0.376876	-2.07384	0.0380938	0.145188	Ptprj
ENSMUSG00000043415	26.2059	0.781425	0.616288	-1.26796	0.204814	0.428528	Otud1
ENSMUSG00000026426	116.331	0.781415	0.457576	-1.70773	0.0876871	0.253209	Arl8a
ENSMUSG00000015474	1216.68	0.781349	0.345371	-2.26235	0.0236759	0.10473	Ppt2
ENSMUSG00000036977	353.864	0.781237	0.339363	-2.30207	0.0213313	0.0976969	Anapc10
ENSMUSG00000073000	11.5094	0.781073	0.741385	-1.05353	0.292097	0.527559	Gm10451
ENSMUSG00000023330	151.91	0.78099	0.38198	-2.04458	0.0408961	0.153017	Dtwd1
ENSMUSG00000106889	6.3128	0.780708	0.785296	-0.994157	0.320147	0.556838	Gm7463
ENSMUSG00000031371	186.699	0.780707	0.366045	-2.13281	0.03294	0.131882	Haus7
ENSMUSG00000105460	9.10591	0.780601	0.776317	-1.00552	0.314648	0.551325	Gm42671
ENSMUSG00000040370	179.709	0.780427	0.391829	-1.99175	0.0463981	0.166725	Lyrm5
ENSMUSG00000024414	447.794	0.780414	0.354935	-2.19875	0.0278955	0.117526	Mrpl27
ENSMUSG00000045065	28.167	0.780362	0.679063	-1.14917	0.250484	0.482849	9930022D16Rik
ENSMUSG00000103953	93.9155	0.780274	0.471402	-1.65522	0.09788	0.271967	Gm29718
ENSMUSG00000030225	868.1	0.779991	0.302312	-2.58008	0.00987772	0.0564985	Dera
ENSMUSG00000025040	1584.28	0.779782	0.333655	-2.33709	0.0194343	0.0914419	Fundc1
ENSMUSG00000097379	58.8518	0.779307	0.489022	-1.59361	0.111024	0.294291	Gm26873
ENSMUSG00000019813	72.8714	0.77922	0.46819	-1.66432	0.0960477	0.268848	Cep57l1
ENSMUSG00000106496	58.5612	0.77909	0.490866	-1.58717	0.112474	0.296585	Gm7733
ENSMUSG00000049811	18.9481	0.779079	0.688998	-1.13074	0.258164	0.491224	Fam161a
ENSMUSG00000036353	381.561	0.778877	0.377232	-2.06472	0.0389496	0.147262	P2ry12
ENSMUSG00000055991	100.484	0.778669	0.430504	-1.80874	0.0704916	0.220186	Zkscan5
ENSMUSG00000021072	2480.68	0.778628	0.302968	-2.57	0.0101699	0.0576473	Tmx1
ENSMUSG00000037720	1188.52	0.7784	0.302295	-2.57497	0.010025	0.0570606	Tmem33
ENSMUSG00000108502	25.951	0.778347	0.639624	-1.21688	0.223649	0.453163	RP23-11L1.1
ENSMUSG00000106837	35.2642	0.777959	0.58381	-1.33256	0.182678	0.400758	D630030B08Rik
ENSMUSG00000085166	29.8451	0.777605	0.58664	-1.32552	0.184997	0.403335	Gm15522
ENSMUSG00000022814	1528.46	0.777398	0.307456	-2.52848	0.0114556	0.0628647	Umps
ENSMUSG00000029551	129.645	0.776725	0.414758	-1.87272	0.061107	0.201289	Psmg3
ENSMUSG00000058966	1699.8	0.776656	0.295275	-2.63028	0.00853138	0.0506006	Fam57b
ENSMUSG00000063800	1043.8	0.776575	0.304161	-2.55317	0.0106746	0.0596858	Prpf38a
ENSMUSG00000028068	90.8325	0.776393	0.446668	-1.73819	0.0821777	0.243483	Iqgap3
ENSMUSG00000090439	5.56813	0.775812	0.785541	-0.987615	0.323341	0.559934	Gm17455
ENSMUSG00000057223	7.74684	0.77523	0.779297	-0.994781	0.319843	0.556565	Gm6578
ENSMUSG00000024273	203.609	0.775214	0.378952	-2.04568	0.0407881	0.152764	2700062C07Rik
ENSMUSG00000035759	15.5164	0.775076	0.697416	-1.11135	0.266416	0.500501	Bbs10
ENSMUSG00000086942	11.7849	0.775009	0.760928	-1.01851	0.308438	0.545047	Gm15489
ENSMUSG00000068962	5.03438	0.774872	0.78309	-0.989506	0.322416	0.558976	Zfp114
ENSMUSG00000038780	72.3127	0.774795	0.493753	-1.56919	0.116603	0.303031	Smurf1
ENSMUSG00000085885	85.9034	0.7744	0.442708	-1.74923	0.0802506	0.239361	Gm11906
ENSMUSG00000029561	9590.56	0.77439	0.304453	-2.54355	0.0109734	0.0608354	Oasl2
ENSMUSG00000007739	2755.56	0.774088	0.302964	-2.55505	0.0106171	0.0594042	Cct4
ENSMUSG00000041747	452.95	0.773984	0.325471	-2.37804	0.0174049	0.0846321	Utp15
ENSMUSG00000027079	595.469	0.773631	0.362805	-2.13236	0.0329773	0.131927	Clp1
ENSMUSG00000100913	12.8293	0.773385	0.720606	-1.07324	0.283162	0.518031	Gm8392
ENSMUSG00000042063	452.234	0.773278	0.365953	-2.11305	0.0345962	0.136027	Zfp386
ENSMUSG00000028016	718.573	0.773153	0.316753	-2.44087	0.014652	0.0747056	Ints12
ENSMUSG00000019254	335.906	0.773076	0.333844	-2.31568	0.0205757	0.0954191	Ppp1r12c
ENSMUSG00000071662	1585.03	0.77303	0.331799	-2.32982	0.0198159	0.0928625	Polr2g
ENSMUSG00000097574	18.676	0.772972	0.684814	-1.12873	0.259011	0.492	C920006O11Rik
ENSMUSG00000083829	166.144	0.772924	0.385735	-2.00377	0.0450946	0.163751	Gm2199
ENSMUSG00000021044	292.689	0.772362	0.352843	-2.18897	0.0285993	0.119758	Adck1
ENSMUSG00000042099	193.037	0.772081	0.379088	-2.03668	0.041682	0.154886	Kank3
ENSMUSG00000001829	292.511	0.771955	0.339021	-2.27701	0.0227855	0.102121	Clpb
ENSMUSG00000020448	481.276	0.771898	0.326726	-2.36252	0.0181511	0.0874419	Rnf185
ENSMUSG00000015357	731.463	0.771282	0.308404	-2.50088	0.0123885	0.0665273	Clpx
ENSMUSG00000039684	979.364	0.770359	0.30542	-2.5223	0.0116591	0.0637047	Gm5422
ENSMUSG00000024766	201.027	0.770322	0.399154	-1.92989	0.0536209	0.183616	Lipo1
ENSMUSG00000028692	12413.8	0.770091	0.331147	-2.32553	0.0200439	0.09367	Akr1a1
ENSMUSG00000021241	634.12	0.768733	0.311114	-2.4709	0.0134772	0.0703639	Isca2
ENSMUSG00000042826	14.3648	0.768698	0.739662	-1.03926	0.298685	0.534865	Fgf11
ENSMUSG00000081758	25.369	0.76803	0.646583	-1.18783	0.234901	0.465463	Gm11460
ENSMUSG00000028945	2559.09	0.767945	0.321485	-2.38874	0.0169062	0.083029	Rheb
ENSMUSG00000037149	1300.53	0.767872	0.322723	-2.37935	0.017343	0.0845166	Ddx1
ENSMUSG00000027698	1490.05	0.767239	0.365274	-2.10044	0.0356897	0.138818	Nceh1
ENSMUSG00000030970	277.15	0.767075	0.350617	-2.18778	0.0286853	0.119919	Ctbp2
ENSMUSG00000018733	35.8545	0.766945	0.568079	-1.35007	0.176994	0.39417	Pex12
ENSMUSG00000079067	6.83844	0.766577	0.779015	-0.984034	0.325099	0.560942	Hmgn2-ps1
ENSMUSG00000080824	25.8173	0.766549	0.62066	-1.23505	0.21681	0.444141	Gm9001
ENSMUSG00000096935	63.1457	0.766472	0.496076	-1.54507	0.122329	0.311081	1700113A16Rik
ENSMUSG00000102717	8.76121	0.766247	0.764955	-1.00169	0.316494	0.553441	Gm37759
ENSMUSG00000029234	135.215	0.766036	0.437154	-1.75233	0.0797176	0.238429	Tmem165
ENSMUSG00000069208	174.567	0.765686	0.384681	-1.99044	0.0465421	0.166965	Zfp825
ENSMUSG00000038279	575.56	0.765301	0.335419	-2.28163	0.0225114	0.101295	Nop2
ENSMUSG00000054894	21.7944	0.764557	0.677217	-1.12897	0.25891	0.491904	Atp5s
ENSMUSG00000036968	350.688	0.764146	0.329598	-2.31842	0.0204267	0.0948734	Cnpy4
ENSMUSG00000006998	3974.82	0.764039	0.291094	-2.62472	0.00867203	0.05107	Psmd2
ENSMUSG00000083107	5.49894	0.763948	0.78553	-0.972525	0.330789	0.566245	Gm5303
ENSMUSG00000082321	1108.37	0.763941	0.332228	-2.29945	0.0214795	0.0981681	Gm14253
ENSMUSG00000030301	108.45	0.763691	0.425524	-1.79471	0.0727002	0.224489	Ccdc91
ENSMUSG00000073448	21.5719	0.7634	0.657627	-1.16084	0.245707	0.477132	Gm10509
ENSMUSG00000038845	234.349	0.763346	0.369881	-2.06376	0.0390405	0.147532	Phb
ENSMUSG00000083822	124.474	0.763212	0.414182	-1.8427	0.0653731	0.210489	Hmgb1-ps5
ENSMUSG00000027882	1589.91	0.763159	0.317986	-2.39997	0.0163962	0.0813113	Stxbp3
ENSMUSG00000048538	24.9769	0.762771	0.617282	-1.23569	0.216573	0.444072	Gm9826
ENSMUSG00000028979	11.3422	0.762638	0.731539	-1.04251	0.297174	0.533619	Masp2
ENSMUSG00000002699	6654.62	0.762631	0.296566	-2.57154	0.0101247	0.0574555	Lcp2
ENSMUSG00000018740	104.397	0.762164	0.435103	-1.75169	0.0798278	0.238589	Slc25a35
ENSMUSG00000038302	91.4261	0.761605	0.468987	-1.62394	0.104389	0.282486	Lace1
ENSMUSG00000105452	71.411	0.761523	0.464168	-1.64062	0.100876	0.276688	Gm5276
ENSMUSG00000035212	3486.2	0.761493	0.303544	-2.50867	0.0121186	0.0654826	Leprot
ENSMUSG00000060029	166.517	0.761445	0.419977	-1.81306	0.0698221	0.219131	4930473A02Rik
ENSMUSG00000041012	8.1837	0.761224	0.774664	-0.98265	0.32578	0.56169	Cmtm8
ENSMUSG00000028082	40.6589	0.76107	0.560002	-1.35905	0.174131	0.390253	Sh3d19
ENSMUSG00000020935	950.487	0.76076	0.302689	-2.51334	0.0119594	0.0649002	Dcakd
ENSMUSG00000020283	537.393	0.760749	0.355913	-2.13746	0.0325607	0.130743	Pex13
ENSMUSG00000033210	14.1999	0.759957	0.720485	-1.05479	0.291523	0.526899	Slc9c1
ENSMUSG00000103199	56.8803	0.759945	0.544346	-1.39607	0.162693	0.373923	Gm37648
ENSMUSG00000021575	49.188	0.759867	0.575409	-1.32057	0.186645	0.405359	Ahrr
ENSMUSG00000001166	135.122	0.75983	0.402363	-1.88842	0.0589701	0.196256	Oas1c
ENSMUSG00000083879	108.702	0.759414	0.429309	-1.76892	0.0769067	0.232501	Gm14038
ENSMUSG00000042712	507.933	0.759359	0.418935	-1.81259	0.0698943	0.21931	Wbp5
ENSMUSG00000012483	167.813	0.759293	0.383676	-1.979	0.0478162	0.170245	Rpa3
ENSMUSG00000095362	24.4478	0.75915	0.661272	-1.14801	0.250962	0.483011	Gm14325
ENSMUSG00000024349	4791.26	0.758237	0.295823	-2.56314	0.0103729	0.0584917	Tmem173
ENSMUSG00000071180	729.505	0.75815	0.323655	-2.34246	0.0191569	0.0905024	Smim15
ENSMUSG00000074215	8.01537	0.758119	0.76692	-0.988523	0.322896	0.559542	Gm10643
ENSMUSG00000017677	2538.4	0.758111	0.343126	-2.20942	0.0271452	0.115101	Wsb1
ENSMUSG00000024732	1749.36	0.757866	0.299658	-2.5291	0.0114355	0.0628001	Ccdc86
ENSMUSG00000070730	959.517	0.757851	0.338474	-2.23902	0.0251544	0.109228	Rmdn3
ENSMUSG00000029782	581.726	0.757815	0.354143	-2.13986	0.0323663	0.13017	Tmem209
ENSMUSG00000022337	853.062	0.75737	0.323495	-2.34121	0.0192214	0.0906937	Emc2
ENSMUSG00000097030	6.69085	0.756978	0.778706	-0.972097	0.331002	0.566355	Gm26693
ENSMUSG00000026615	1419.16	0.756898	0.299812	-2.52457	0.0115838	0.0633837	Eprs
ENSMUSG00000006299	3527.17	0.756447	0.291297	-2.59682	0.00940899	0.0544966	Aamp
ENSMUSG00000034875	368.705	0.756402	0.384352	-1.96799	0.0490689	0.172923	Nudt19
ENSMUSG00000103614	26.8155	0.756258	0.611389	-1.23695	0.216105	0.443394	Gm37949
ENSMUSG00000018442	2594.58	0.756255	0.289285	-2.61422	0.00894314	0.052322	Derl2
ENSMUSG00000024430	29.5395	0.756022	0.617062	-1.2252	0.220501	0.449612	Cabyr
ENSMUSG00000028138	1084.29	0.755643	0.308835	-2.44675	0.0144151	0.0738352	Adh5
ENSMUSG00000035069	550.314	0.755346	0.322024	-2.34562	0.0189953	0.0899917	Oma1
ENSMUSG00000028452	2002.86	0.755326	0.295063	-2.55988	0.0104708	0.0588646	Vcp
ENSMUSG00000104925	6.02918	0.754912	0.78248	-0.964768	0.334661	0.569717	Gm43061
ENSMUSG00000043298	6.92026	0.754598	0.784811	-0.961503	0.336299	0.571406	Smco3
ENSMUSG00000026864	35185.8	0.754422	0.326883	-2.30793	0.0210032	0.0966031	Hspa5
ENSMUSG00000074170	140.078	0.754411	0.39946	-1.88858	0.0589482	0.196226	Plekhf1
ENSMUSG00000106472	13.6546	0.75357	0.753325	-1.00033	0.317153	0.554176	Gm43111
ENSMUSG00000002635	487.277	0.753406	0.334561	-2.25192	0.0243271	0.106862	Pdcd2l
ENSMUSG00000040466	1568.36	0.753377	0.453934	-1.65966	0.0969828	0.270466	Blvrb
ENSMUSG00000055435	1145.82	0.753302	0.308612	-2.44093	0.0146494	0.0747056	Maf
ENSMUSG00000025473	3770.46	0.75327	0.336478	-2.23869	0.0251759	0.109282	Adam8
ENSMUSG00000037257	1456.82	0.753242	0.298081	-2.52697	0.0115051	0.063068	Aagab
ENSMUSG00000087299	12.1746	0.753133	0.737972	-1.02054	0.30747	0.54418	Gm12953
ENSMUSG00000058492	2133.97	0.753004	0.318281	-2.36585	0.0179888	0.0867806	Scp2-ps2
ENSMUSG00000090023	51.9722	0.752812	0.517068	-1.45593	0.145413	0.348486	Gm16302
ENSMUSG00000106068	4.79	0.752773	0.785737	-0.958046	0.338039	0.572896	Gm9497
ENSMUSG00000037216	19.4186	0.752444	0.707142	-1.06406	0.2873	0.521934	Lipt1
ENSMUSG00000074796	2689.19	0.752283	0.346098	-2.17361	0.0297342	0.122746	Slc4a11
ENSMUSG00000066150	2841.59	0.752198	0.300042	-2.50697	0.012177	0.0656812	Slc31a1
ENSMUSG00000023452	863.311	0.751812	0.339515	-2.21437	0.0268031	0.114194	Pisd
ENSMUSG00000025134	43.4384	0.751652	0.547412	-1.3731	0.169721	0.383616	Alyref
ENSMUSG00000041247	15.2627	0.751511	0.694505	-1.08208	0.279217	0.513791	Lamp3
ENSMUSG00000072244	28.7625	0.751484	0.612961	-1.22599	0.220202	0.449183	Trim6
ENSMUSG00000019055	1665.43	0.751236	0.326208	-2.30293	0.0212826	0.0975787	Plod1
ENSMUSG00000039982	140.643	0.7511	0.39883	-1.88326	0.0596656	0.197788	Dtx4
ENSMUSG00000026492	70.0471	0.751016	0.474207	-1.58373	0.113255	0.29765	Tfb2m
ENSMUSG00000026078	1106.13	0.750598	0.298144	-2.51757	0.0118167	0.0643335	Pdcl3
ENSMUSG00000084964	39.0762	0.74954	0.544007	-1.37781	0.168261	0.381396	Gm15503
ENSMUSG00000032306	427.509	0.749122	0.347755	-2.15417	0.031227	0.12668	Mpi
ENSMUSG00000001751	782.37	0.748472	0.359101	-2.08429	0.0371335	0.142808	Naglu
ENSMUSG00000020522	1512.16	0.748411	0.300643	-2.48937	0.012797	0.0678782	Mfap3
ENSMUSG00000097692	62.2429	0.748368	0.478363	-1.56444	0.117715	0.304408	A230060F14Rik
ENSMUSG00000056144	1033.28	0.748316	0.311777	-2.40016	0.0163878	0.0813113	Trim34a
ENSMUSG00000085112	7.03555	0.748273	0.785884	-0.952141	0.341025	0.575506	A530072M11Rik
ENSMUSG00000048175	871.628	0.747755	0.342546	-2.18293	0.0290408	0.121005	Asb8
ENSMUSG00000064090	905.105	0.74713	0.357066	-2.09241	0.0364017	0.140792	Vrk2
ENSMUSG00000051116	120.892	0.74678	0.429439	-1.73897	0.0820409	0.243221	Gm8121
ENSMUSG00000089647	1155.51	0.746661	0.323883	-2.30534	0.0211476	0.0970906	Gm2245
ENSMUSG00000062040	73.0395	0.746634	0.472681	-1.57957	0.114204	0.299211	Zfp27
ENSMUSG00000037072	4448.54	0.746111	0.306245	-2.43632	0.0148374	0.0753865	2015-09-01
ENSMUSG00000030057	8671.37	0.746062	0.292858	-2.54752	0.0108492	0.0603681	Cnbp
ENSMUSG00000020982	1550.1	0.74557	0.298761	-2.49554	0.0125767	0.0670963	Nemf
ENSMUSG00000083064	116.813	0.745528	0.413463	-1.80313	0.0713676	0.221821	Gm7785
ENSMUSG00000072763	15.8967	0.745487	0.713901	-1.04424	0.296373	0.532957	5430403G16Rik
ENSMUSG00000031901	283.641	0.744986	0.3935	-1.89323	0.0583274	0.194888	Dus2
ENSMUSG00000096401	30.9785	0.744874	0.668237	-1.11469	0.264985	0.499369	Gm21811
ENSMUSG00000079224	12.2541	0.744859	0.738168	-1.00906	0.312944	0.549547	Gm6565
ENSMUSG00000039795	160.72	0.744803	0.378226	-1.9692	0.0489301	0.172629	Zfand1
ENSMUSG00000086886	555.753	0.744632	0.335805	-2.21746	0.0265919	0.113614	Gm15135
ENSMUSG00000040410	270.305	0.744512	0.367679	-2.0249	0.0428781	0.157901	Fbxl4
ENSMUSG00000081390	8.59288	0.74414	0.761379	-0.977358	0.328392	0.564163	Gm14538
ENSMUSG00000081896	20.4051	0.744075	0.65998	-1.12742	0.259565	0.492653	Gm5389
ENSMUSG00000047037	9.93354	0.743518	0.747063	-0.995255	0.319612	0.556479	Nipa1
ENSMUSG00000037816	805.18	0.74332	0.321533	-2.3118	0.0207885	0.0960494	Fbxw17
ENSMUSG00000068264	310.877	0.743288	0.34409	-2.16016	0.0307603	0.125477	Ap5s1
ENSMUSG00000009907	3038.07	0.743064	0.295433	-2.51516	0.0118977	0.0646814	Vps4b
ENSMUSG00000039163	170.639	0.742873	0.398673	-1.86336	0.062411	0.204075	Cmc1
ENSMUSG00000084349	2697.63	0.742784	0.297243	-2.49891	0.0124577	0.0666256	Rpl3-ps1
ENSMUSG00000020528	190.188	0.742564	0.365375	-2.03234	0.0421197	0.15613	Prpsap2
ENSMUSG00000020227	1527.15	0.742373	0.304104	-2.44118	0.0146394	0.0747056	Irak3
ENSMUSG00000009894	242.082	0.741553	0.351444	-2.11002	0.034857	0.136738	Snap47
ENSMUSG00000028221	350.751	0.741377	0.333078	-2.22584	0.026025	0.111728	Tmem55a
ENSMUSG00000094796	765.354	0.740401	0.3085	-2.4	0.0163949	0.0813113	BC147527
ENSMUSG00000028926	484.279	0.740268	0.338255	-2.18849	0.0286338	0.119803	Cdk14
ENSMUSG00000107319	188.819	0.740034	0.364719	-2.02905	0.0424533	0.156946	Gm42670
ENSMUSG00000033429	124.812	0.739984	0.405042	-1.82693	0.0677103	0.215194	Mcee
ENSMUSG00000095419	51.2926	0.739884	0.618951	-1.19538	0.231937	0.462774	Gm14328
ENSMUSG00000030156	2379.18	0.739642	0.297669	-2.48478	0.0129632	0.0684353	Cd69
ENSMUSG00000103367	148.501	0.739626	0.393692	-1.87869	0.0602864	0.199323	Gm38158
ENSMUSG00000021715	341.785	0.739206	0.333041	-2.21956	0.0264486	0.113065	Cwc27
ENSMUSG00000027710	327.968	0.739044	0.375836	-1.9664	0.0492526	0.173484	Acad9
ENSMUSG00000031931	287.399	0.738951	0.339733	-2.17509	0.0296232	0.122524	Ankrd49
ENSMUSG00000026229	1828.87	0.738919	0.296296	-2.49385	0.0126364	0.0673203	Psmd1
ENSMUSG00000026021	1848.35	0.738886	0.31071	-2.37806	0.0174041	0.0846321	Sumo1
ENSMUSG00000078784	153.988	0.738163	0.394814	-1.86965	0.061533	0.202252	1810022K09Rik
ENSMUSG00000074896	8645.41	0.738121	0.282258	-2.61506	0.00892113	0.0522301	Ifit3
ENSMUSG00000031174	35.1544	0.738026	0.620406	-1.18958	0.23421	0.465029	Rpgr
ENSMUSG00000103772	120.015	0.737878	0.468586	-1.57469	0.115328	0.301136	Gm36933
ENSMUSG00000056888	1860.96	0.737229	0.289153	-2.54961	0.0107842	0.0601391	Glipr1
ENSMUSG00000053925	69.5951	0.737012	0.465833	-1.58214	0.113618	0.298398	Gm9929
ENSMUSG00000059658	84.5894	0.736763	0.479622	-1.53613	0.124506	0.314399	Gm16379
ENSMUSG00000029554	710.472	0.736594	0.306394	-2.40408	0.0162134	0.0805933	Mad1l1
ENSMUSG00000086459	51.5211	0.736576	0.513901	-1.4333	0.151771	0.357508	1700030C12Rik
ENSMUSG00000023104	3871.89	0.736552	0.316461	-2.32747	0.0199403	0.0933012	Rfc2
ENSMUSG00000031167	307.669	0.736518	0.360663	-2.04212	0.0411395	0.153662	Rbm3
ENSMUSG00000030868	1726.52	0.736391	0.294672	-2.49902	0.0124539	0.0666256	Dctn5
ENSMUSG00000001785	482.426	0.73628	0.324292	-2.27042	0.0231821	0.1033	Pwp1
ENSMUSG00000024889	658.662	0.736162	0.317322	-2.31992	0.0203453	0.0946161	Rce1
ENSMUSG00000031246	2824.3	0.735516	0.3193	-2.30353	0.0212493	0.0974982	Sh3bgrl
ENSMUSG00000028419	1327.99	0.735398	0.298853	-2.46073	0.0138654	0.0719687	Chmp5
ENSMUSG00000080896	172.444	0.73523	0.398431	-1.84531	0.0649918	0.209529	Gm14567
ENSMUSG00000002222	220.525	0.735158	0.436596	-1.68384	0.0922127	0.261325	Rmnd5a
ENSMUSG00000087545	59.3079	0.734881	0.524015	-1.4024	0.160794	0.371079	Gm13966
ENSMUSG00000026065	14.6553	0.734731	0.711398	-1.0328	0.301698	0.537648	Slc9a4
ENSMUSG00000020432	4380.08	0.734716	0.290421	-2.52983	0.0114118	0.0627381	Tcn2
ENSMUSG00000099137	31.8011	0.734695	0.615264	-1.19411	0.232434	0.463461	Gm10603
ENSMUSG00000025940	540.882	0.734648	0.328005	-2.23975	0.0251072	0.109055	Tmem70
ENSMUSG00000068749	299.773	0.734616	0.344963	-2.12955	0.0332088	0.132538	Psma5
ENSMUSG00000034709	564.469	0.734362	0.317148	-2.31552	0.0205846	0.0954315	Ppp1r21
ENSMUSG00000024382	261.31	0.734357	0.436323	-1.68306	0.0923637	0.261576	Ercc3
ENSMUSG00000067369	225.513	0.734252	0.361765	-2.02964	0.0423935	0.156898	Trmt2b
ENSMUSG00000042628	156.907	0.732647	0.406713	-1.80139	0.071642	0.222446	Zfyve1
ENSMUSG00000019861	51.5281	0.732444	0.526684	-1.39067	0.164325	0.376652	Gopc
ENSMUSG00000005981	1176.22	0.732213	0.301162	-2.4313	0.0150449	0.0762871	Trap1
ENSMUSG00000053931	1052.95	0.732178	0.306359	-2.38993	0.0168514	0.0828596	Cnn3
ENSMUSG00000021619	176.548	0.732067	0.385956	-1.89676	0.0578597	0.193624	Atg10
ENSMUSG00000036580	395.355	0.731706	0.343535	-2.12993	0.0331773	0.132482	Spg20
ENSMUSG00000023903	776.297	0.731326	0.403141	-1.81407	0.0696667	0.218825	Mmp25
ENSMUSG00000031928	305.188	0.731274	0.383132	-1.90867	0.0563043	0.190163	Mre11a
ENSMUSG00000014226	1833.91	0.731175	0.30904	-2.36596	0.0179836	0.0867806	Cacybp
ENSMUSG00000040359	674.634	0.729954	0.328532	-2.22187	0.0262922	0.11257	Ufl1
ENSMUSG00000037306	202.11	0.72982	0.403181	-1.81016	0.0702716	0.219677	Man1c1
ENSMUSG00000021771	2093.98	0.729808	0.295871	-2.46665	0.0136385	0.0709859	Vdac2
ENSMUSG00000036932	747.912	0.729695	0.328551	-2.22095	0.0263545	0.112727	Aifm1
ENSMUSG00000026814	639.061	0.729647	0.327682	-2.22669	0.0259677	0.111545	Eng
ENSMUSG00000079363	5601.67	0.729605	0.308232	-2.36707	0.0179297	0.0865678	Gbp4
ENSMUSG00000032553	441.859	0.729174	0.324911	-2.24423	0.0248179	0.108381	Srprb
ENSMUSG00000025933	24.6518	0.728487	0.638483	-1.14097	0.253884	0.486074	Tmem14a
ENSMUSG00000086486	5.26719	0.728244	0.785597	-0.926994	0.353929	0.58798	Ift88os
ENSMUSG00000015745	1534.7	0.728238	0.303746	-2.39753	0.0165062	0.0815936	Plekho1
ENSMUSG00000030695	20349.6	0.728032	0.293327	-2.48198	0.0130653	0.0688784	Aldoa
ENSMUSG00000024800	342.841	0.728009	0.339896	-2.14185	0.0322052	0.129798	Rpp30
ENSMUSG00000037361	889.286	0.728008	0.306052	-2.3787	0.0173736	0.0846224	Sf3b6
ENSMUSG00000109357	95.3599	0.727941	0.463263	-1.57134	0.116105	0.302307	RP23-383B18.1
ENSMUSG00000034266	557.573	0.727871	0.334151	-2.17827	0.0293859	0.121902	Batf
ENSMUSG00000027628	780.199	0.727268	0.321441	-2.26253	0.0236649	0.10473	Aar2
ENSMUSG00000085929	7.35487	0.727193	0.775507	-0.937701	0.348398	0.582754	Gm13421
ENSMUSG00000026687	1341.83	0.727096	0.306125	-2.37516	0.0175415	0.0851276	Aldh9a1
ENSMUSG00000003929	74.9749	0.726736	0.46266	-1.57078	0.116234	0.302437	Zfp81
ENSMUSG00000032412	7041.43	0.726675	0.309019	-2.35155	0.0186952	0.0892114	Atp1b3
ENSMUSG00000061950	670.985	0.726649	0.345408	-2.10374	0.0354013	0.138146	Ppp4r1
ENSMUSG00000028645	1658.23	0.726329	0.324171	-2.24057	0.0250537	0.108916	Slc2a1
ENSMUSG00000028114	345.655	0.726249	0.360574	-2.01415	0.0439943	0.160745	Mettl14
ENSMUSG00000037331	268.121	0.726074	0.359468	-2.01986	0.0433982	0.159348	Larp1
ENSMUSG00000086289	772.805	0.726007	0.328404	-2.21072	0.0270555	0.114881	Gm16933
ENSMUSG00000103270	41.4705	0.725794	0.56286	-1.28948	0.197233	0.419327	Gm37915
ENSMUSG00000073125	52.6865	0.725693	0.545169	-1.33113	0.183145	0.401435	Xlr3b
ENSMUSG00000021306	774.201	0.725353	0.313435	-2.3142	0.0206565	0.0956478	Gpr137b
[truncated: 13,148 more rows]
