# Supplementary material for: Invasive margin tissue-resident macrophages of high CD163 expression impede responses to T cell-based immunotherapy
Source: HighWire-hosted journal article supplement (doi:10.1136/jitc-2022-006433), 2023-03-01
Supplement: jitc-2022-006433supp003_data_supplement.xlsx [file jitc-2022-006433supp003_data_supplement.xlsx]

## Sheet: CD163_hi_v_CD163_neg_3.all
Supplementary table 2. All DEG genes of CD163hi versus CD163neg macrophages. Related to Figure 6. Ensembl Stable IDs, base Mean value, log2FoldChange (log2(CD163hi)-log2(CD163neg)), IfcSE, statistics, p-value, p-adjusted value and GeneName of CD163hi macrophages when compared to CD163neg macrophages in the TME of TC-1 tumors treated with therapeutic vaccination.
ID	baseMean	log2FoldChange(log2(CD163_hi)-log2(CD163_neg))	lfcSE	stat	pvalue	p_adjusted	GeneName
ENSMUSG00000049723	495.608	9.46621	0.980563	-9.65385	4.7344e-22	2.60866e-19	Mmp12
ENSMUSG00000029373	533.061	9.17324	0.888049	-10.3297	5.17472e-25	5.51246e-22	Pf4
ENSMUSG00000027670	1257.09	9.06495	0.79916	-11.3431	8.02525e-30	2.56471e-26	Ocstamp
ENSMUSG00000032725	478.201	8.63682	0.884824	-9.76105	1.65429e-22	9.79032e-20	Folr2
ENSMUSG00000061100	341.762	8.58627	0.915029	-9.38361	6.37521e-21	2.54674e-18	Retnla
ENSMUSG00000050578	729.395	8.50582	0.813473	-10.4562	1.37279e-25	1.68737e-22	Mmp13
ENSMUSG00000042286	1111.04	8.28133	0.832154	-9.95168	2.47952e-23	1.65084e-20	Stab1
ENSMUSG00000019987	256.246	8.1186	0.920801	-8.81689	1.17683e-18	3.1341e-16	Arg1
ENSMUSG00000040026	846.847	8.11501	0.706791	-11.4815	1.63454e-30	6.52956e-27	Saa3
ENSMUSG00000051906	94.4608	8.10361	1.1988	-6.75976	1.38216e-11	8.06041e-10	Cd209f
ENSMUSG00000026829	129.385	7.77769	1.02937	-7.55577	4.16381e-14	4.58851e-12	Gbgt1
ENSMUSG00000030787	119.055	7.61588	1.05141	-7.24346	4.37383e-13	3.67839e-11	Lyve1
ENSMUSG00000084202	64.5635	7.60068	1.22966	-6.1811	6.36547e-10	2.56206e-08	Gm5398
ENSMUSG00000097558	53.0327	7.34995	1.24456	-5.90564	3.51277e-09	1.21106e-07	Gm26902
ENSMUSG00000025150	438.668	7.19877	0.858476	-8.38552	5.05019e-17	1.03458e-14	Cbr2
ENSMUSG00000092528	265.108	7.16247	0.769102	-9.31278	1.24533e-20	4.73787e-18	Nlrp1c-ps
ENSMUSG00000040552	18068.7	7.13638	0.601756	-11.8593	1.92648e-32	1.53916e-28	C3ar1
ENSMUSG00000089753	45.5192	7.13585	1.26024	-5.66229	1.49367e-08	4.62547e-07	Gm11709
ENSMUSG00000085295	235.486	7.09095	0.818808	-8.66009	4.71394e-18	1.09165e-15	4930430E12Rik
ENSMUSG00000047592	1488.27	7.05369	0.625399	-11.2787	1.67201e-29	4.45285e-26	Nxpe5
ENSMUSG00000035352	1437.34	7.05273	0.852078	-8.2771	1.26216e-16	2.42989e-14	Ccl12
ENSMUSG00000022181	80.4601	6.99515	1.08313	-6.45824	1.05925e-10	5.0981e-09	C6
ENSMUSG00000050370	273.159	6.97927	0.792635	-8.80515	1.30675e-18	3.42304e-16	Ch25h
ENSMUSG00000018920	24858.5	6.97817	0.534927	-13.0451	6.77932e-39	1.08327e-34	Cxcl16
ENSMUSG00000061666	295.414	6.96975	0.751929	-9.26916	1.87615e-20	6.51719e-18	Gdpd1
ENSMUSG00000022415	71.4759	6.89635	1.07153	-6.43599	1.22672e-10	5.74577e-09	Syngr1
ENSMUSG00000040950	184.92	6.87294	0.904287	-7.6004	2.9522e-14	3.52038e-12	Mgl2
ENSMUSG00000029417	2845.75	6.8551	0.618989	-11.0747	1.66466e-28	3.32496e-25	Cxcl9
ENSMUSG00000071311	93.7048	6.83367	0.973985	-7.0162	2.27988e-12	1.61912e-10	Gpr31b
ENSMUSG00000074345	67.371	6.82715	1.07197	-6.36878	1.90537e-10	8.6249e-09	Tnfaip8l3
ENSMUSG00000040829	6870.2	6.82522	0.591614	-11.5366	8.62639e-31	4.5947e-27	Zmynd15
ENSMUSG00000051969	62.9975	6.79768	1.07907	-6.29955	2.98502e-10	1.30679e-08	Tlr11
ENSMUSG00000009185	2051.04	6.79332	0.71165	-9.54587	1.34966e-21	6.5352e-19	Ccl8
ENSMUSG00000079168	34.8121	6.7829	1.28391	-5.28301	1.27081e-07	3.16297e-06	Cd209g
ENSMUSG00000070524	146.994	6.77129	0.839058	-8.07011	7.02349e-16	1.13366e-13	Fcrlb
ENSMUSG00000044309	414.236	6.70754	0.866669	-7.73944	9.9856e-15	1.30787e-12	Apol7c
ENSMUSG00000015852	473.208	6.68037	0.649524	-10.285	8.23259e-25	8.22178e-22	Fcrls
ENSMUSG00000052403	89.8766	6.65682	1.03306	-6.44377	1.1654e-10	5.52578e-09	Fcnaos
ENSMUSG00000026938	340.699	6.63618	0.963009	-6.89109	5.53663e-12	3.49683e-10	Fcna
ENSMUSG00000020826	126.029	6.56656	0.887621	-7.39794	1.38313e-13	1.31554e-11	Nos2
ENSMUSG00000020829	123.189	6.53521	0.888505	-7.3553	1.90504e-13	1.73947e-11	Slc46a1
ENSMUSG00000028327	72.9147	6.47886	0.995703	-6.50682	7.6757e-11	3.80901e-09	Stra6l
ENSMUSG00000044156	28.0639	6.46923	1.3097	-4.93946	7.83384e-07	1.63844e-05	Hepacam2
ENSMUSG00000053007	597.5	6.44409	0.751207	-8.57832	9.62687e-18	2.16659e-15	Creb5
ENSMUSG00000039115	326.9	6.4078	0.672611	-9.52675	1.62281e-21	7.62675e-19	Itga9
ENSMUSG00000060586	89578.4	6.40736	0.577304	-11.0988	1.27177e-28	2.9031e-25	H2-Eb1
ENSMUSG00000038156	1520.38	6.38573	0.587738	-10.8649	1.69372e-27	2.70639e-24	Spon1
ENSMUSG00000029925	767.539	6.37344	0.602779	-10.5734	3.9572e-26	5.74837e-23	Tbxas1
ENSMUSG00000082976	25.8125	6.37135	1.31519	-4.84442	1.26983e-06	2.50641e-05	Gm15056
ENSMUSG00000031214	371.493	6.34777	0.677362	-9.3713	7.16446e-21	2.79222e-18	Ophn1
ENSMUSG00000070323	25.3023	6.33724	1.31826	-4.80726	1.53013e-06	2.98171e-05	Mmp27
ENSMUSG00000087362	112.121	6.33626	0.864943	-7.32563	2.37771e-13	2.12253e-11	Gm13710
ENSMUSG00000008845	133.996	6.33613	0.963802	-6.5741	4.8948e-11	2.51492e-09	Cd163
ENSMUSG00000029059	1089.35	6.32274	0.633206	-9.98527	1.7681e-23	1.34536e-20	Fam213b
ENSMUSG00000050994	44.3067	6.31463	1.10828	-5.69769	1.21444e-08	3.81249e-07	Adgb
ENSMUSG00000096140	25.1409	6.3013	1.32436	-4.75801	1.9551e-06	3.7181e-05	Ankrd66
ENSMUSG00000024049	82.7117	6.28176	0.912421	-6.88472	5.79029e-12	3.64264e-10	Myom1
ENSMUSG00000070427	7468.31	6.25424	0.657561	-9.51128	1.88334e-21	8.59827e-19	Il18bp
ENSMUSG00000026656	17554.2	6.22902	0.648008	-9.61256	7.07654e-22	3.64761e-19	Fcgr2b
ENSMUSG00000087289	80.353	6.22847	0.948432	-6.56712	5.12971e-11	2.62717e-09	4933424M12Rik
ENSMUSG00000045404	193.104	6.22451	0.790588	-7.87328	3.45474e-15	4.92887e-13	Kcnk13
ENSMUSG00000090173	41.5404	6.21988	1.11604	-5.5732	2.50105e-08	7.30607e-07	Fbxw10
ENSMUSG00000036887	27154.5	6.21848	0.618773	-10.0497	9.21501e-24	7.74982e-21	C1qa
ENSMUSG00000037418	188.399	6.20526	0.755704	-8.21123	2.18937e-16	3.97545e-14	Best1
ENSMUSG00000022150	5270.95	6.16527	0.617272	-9.98794	1.72124e-23	1.34536e-20	Dab2
ENSMUSG00000091017	38.7987	6.11906	1.12463	-5.44094	5.30007e-08	1.43786e-06	Fam71a
ENSMUSG00000024672	20004.9	6.11407	0.67789	-9.01926	1.89362e-19	5.93297e-17	Ms4a7
ENSMUSG00000042190	208.403	6.11321	0.878421	-6.95932	3.41917e-12	2.33483e-10	Cmklr1
ENSMUSG00000031451	229.13	6.08983	0.879813	-6.92173	4.46154e-12	2.88627e-10	Gas6
ENSMUSG00000099398	423.162	6.07265	0.653644	-9.29045	1.53638e-20	5.45553e-18	Ms4a14
ENSMUSG00000031443	71.2012	6.05649	0.959157	-6.31439	2.71227e-10	1.19392e-08	F7
ENSMUSG00000024535	119.119	6.01788	0.798772	-7.53392	4.92388e-14	5.28045e-12	Snx24
ENSMUSG00000026712	1388.62	5.98539	0.586397	-10.2071	1.84361e-24	1.73289e-21	Mrc1
ENSMUSG00000090222	53.2861	5.98145	1.02307	-5.84657	5.01819e-09	1.69168e-07	Gm16340
ENSMUSG00000050919	19.6575	5.96226	1.34836	-4.42187	9.78505e-06	0.000155423	Zfp366
ENSMUSG00000000530	1036.13	5.9358	0.637947	-9.30453	1.34583e-20	4.8875e-18	Acvrl1
ENSMUSG00000090939	33.512	5.91885	1.13836	-5.19947	1.99858e-07	4.81679e-06	Gm17147
ENSMUSG00000037161	33.5612	5.91402	1.14119	-5.18232	2.19139e-07	5.23412e-06	Mgarp
ENSMUSG00000058427	128.25	5.90342	0.8896	-6.63604	3.2222e-11	1.70489e-09	Cxcl2
ENSMUSG00000057135	2863.85	5.90308	0.773707	-7.6296	2.35483e-14	2.89445e-12	Scimp
ENSMUSG00000036905	56319.8	5.88886	0.539761	-10.9101	1.0312e-27	1.83084e-24	C1qb
ENSMUSG00000035914	222.479	5.87558	0.689317	-8.52378	1.54429e-17	3.30273e-15	Cd276
ENSMUSG00000074622	817.758	5.87282	0.644375	-9.11398	7.94111e-20	2.58961e-17	Mafb
ENSMUSG00000089942	638.796	5.87231	0.619726	-9.47565	2.65102e-21	1.14488e-18	Pira2
ENSMUSG00000053318	3463.05	5.86076	0.565911	-10.3563	3.91676e-25	4.47042e-22	Slamf8
ENSMUSG00000024798	188.431	5.84019	0.732681	-7.97098	1.57418e-15	2.41864e-13	Htr7
ENSMUSG00000014158	46.6412	5.83856	1.04208	-5.60278	2.10942e-08	6.27681e-07	Trpv4
ENSMUSG00000105889	18.1268	5.82524	1.36048	-4.28177	1.85416e-05	0.000270485	Gm42776
ENSMUSG00000022122	140.922	5.81629	0.898797	-6.47119	9.7231e-11	4.69382e-09	Ednrb
ENSMUSG00000030711	32.4267	5.79826	1.13797	-5.09525	3.48289e-07	7.8606e-06	Sult1a1
ENSMUSG00000052688	3257.87	5.78204	0.609171	-9.49164	2.27424e-21	1.00945e-18	Rab7b
ENSMUSG00000015305	98.9217	5.7523	0.810623	-7.09614	1.28287e-12	9.66931e-11	Sash1
ENSMUSG00000045322	112.23	5.73217	0.884436	-6.48117	9.10164e-11	4.41265e-09	Tlr9
ENSMUSG00000106737	16.5086	5.71935	1.36466	-4.19104	2.77675e-05	0.000380855	Gm42962
ENSMUSG00000074796	1838.14	5.70631	0.876038	-6.51378	7.32847e-11	3.65443e-09	Slc4a11
ENSMUSG00000055110	41.751	5.69838	1.04351	-5.46079	4.7401e-08	1.29918e-06	A630012P03Rik
ENSMUSG00000001128	13460.6	5.68469	0.581957	-9.76823	1.54116e-22	9.47163e-20	Cfp
ENSMUSG00000015947	8410.89	5.66586	0.538104	-10.5293	6.32955e-26	8.42832e-23	Fcgr1
ENSMUSG00000097107	16.0229	5.66454	1.37029	-4.13382	3.5679e-05	0.000476437	Platr6
ENSMUSG00000079625	15.9983	5.64814	1.37343	-4.11243	3.91509e-05	0.000514891	Tm4sf19
ENSMUSG00000002985	154423	5.64628	0.578885	-9.75371	1.77855e-22	1.01498e-19	Apoe
ENSMUSG00000022126	571.466	5.62164	0.598274	-9.39642	5.64492e-21	2.31283e-18	Irg1
ENSMUSG00000036594	113464	5.62087	0.56362	-9.9728	2.00493e-23	1.45622e-20	H2-Aa
ENSMUSG00000006411	162.688	5.60253	0.749413	-7.4759	7.66792e-14	7.85421e-12	Pvrl4
ENSMUSG00000024663	5009.19	5.58362	0.767598	-7.27415	3.48598e-13	2.99476e-11	Rab3il1
ENSMUSG00000086507	531.614	5.57795	0.607607	-9.1802	4.30305e-20	1.46294e-17	Adap2os
ENSMUSG00000105748	26.5379	5.57402	1.17053	-4.76195	1.91729e-06	3.65153e-05	Gm43088
ENSMUSG00000020264	15.0224	5.57358	1.37705	-4.04748	5.17717e-05	0.000654478	Slc36a2
ENSMUSG00000048779	3324.91	5.57271	0.548541	-10.1592	3.01687e-24	2.67815e-21	P2ry6
ENSMUSG00000093622	15.2038	5.56754	1.38053	-4.03291	5.50904e-05	0.000689882	Gm20703
ENSMUSG00000074417	257.974	5.55434	0.693603	-8.00795	1.1664e-15	1.84534e-13	Gm14548
ENSMUSG00000049130	4761.76	5.54214	0.556257	-9.96327	2.20681e-23	1.53315e-20	C5ar1
ENSMUSG00000073421	291020	5.54205	0.647426	-8.56013	1.12739e-17	2.46776e-15	H2-Ab1
ENSMUSG00000035165	14.7673	5.53388	1.38199	-4.00427	6.22095e-05	0.000766321	Kcne3
ENSMUSG00000086712	37.2278	5.5149	1.03395	-5.33382	9.61664e-08	2.47049e-06	AI427809
ENSMUSG00000029333	2214.68	5.502	0.553195	-9.94586	2.62895e-23	1.68032e-20	Rasgef1b
ENSMUSG00000025044	4521.84	5.49414	0.723532	-7.5935	3.11385e-14	3.63184e-12	Msr1
ENSMUSG00000034957	125.065	5.47599	0.79008	-6.93093	4.18071e-12	2.74912e-10	Cebpa
ENSMUSG00000009876	25.061	5.4631	1.18654	-4.60423	4.13992e-06	7.23762e-05	Cox4i2
ENSMUSG00000030806	13.4825	5.41374	1.39027	-3.89401	9.85992e-05	0.00113592	Stx1b
ENSMUSG00000061578	13.5071	5.41014	1.39169	-3.88747	0.000101294	0.00116194	Ksr2
ENSMUSG00000036634	66.5017	5.3999	0.931266	-5.79846	6.69286e-09	2.20961e-07	Mag
ENSMUSG00000022220	158.88	5.39924	0.740526	-7.29109	3.07462e-13	2.67007e-11	Adcy4
ENSMUSG00000029915	2687.47	5.3983	0.740226	-7.29278	3.03629e-13	2.65119e-11	Clec5a
ENSMUSG00000027322	125.717	5.39723	0.915274	-5.89685	3.70505e-09	1.27045e-07	Siglec1
ENSMUSG00000025804	5789.62	5.39054	0.673783	-8.00041	1.24004e-15	1.94261e-13	Ccr1
ENSMUSG00000039809	13.5563	5.38112	1.39915	-3.84599	0.000120068	0.00134661	Gabbr2
ENSMUSG00000051373	24.8904	5.3759	1.21894	-4.4103	1.03227e-05	0.000163151	Plpp7
ENSMUSG00000027962	1340.08	5.35617	0.663705	-8.07011	7.02374e-16	1.13366e-13	Vcam1
ENSMUSG00000027435	832.442	5.34721	0.610429	-8.75976	1.95658e-18	4.96258e-16	Cd93
ENSMUSG00000069515	675.651	5.33661	0.684692	-7.79417	6.48328e-15	8.85439e-13	Lyz1
ENSMUSG00000049939	22.5207	5.3307	1.19222	-4.47122	7.77734e-06	0.00012681	Lrrc4
ENSMUSG00000025877	2513.82	5.32372	0.688587	-7.73136	1.064e-14	1.38225e-12	Hk3
ENSMUSG00000025993	651.196	5.30533	0.751086	-7.06355	1.62306e-12	1.20069e-10	Slc40a1
ENSMUSG00000030117	704.586	5.30306	0.671892	-7.89273	2.95645e-15	4.25595e-13	Gdf3
ENSMUSG00000020709	1486.57	5.30293	0.551116	-9.62216	6.44615e-22	3.43343e-19	Adap2
ENSMUSG00000035373	1871.55	5.29911	0.712154	-7.44096	9.99559e-14	9.67997e-12	Ccl7
ENSMUSG00000109089	42.7832	5.28444	0.975517	-5.41707	6.05844e-08	1.62157e-06	RP23-366O14.6
ENSMUSG00000002108	1900.67	5.28369	0.557875	-9.47109	2.76928e-21	1.16448e-18	Nr1h3
ENSMUSG00000074280	167.368	5.27789	0.685919	-7.69463	1.41901e-14	1.79955e-12	Gm6166
ENSMUSG00000025855	71.0677	5.2736	0.923221	-5.71217	1.11545e-08	3.54349e-07	Prkar1b
ENSMUSG00000104082	12.4083	5.27351	1.40333	-3.75787	0.000171369	0.0018241	Gm7115
ENSMUSG00000086109	12.6926	5.25645	1.41088	-3.72564	0.000194817	0.00202932	Gm13391
ENSMUSG00000074420	12.2761	5.25365	1.4065	-3.73526	0.000187518	0.00196353	Gm10693
ENSMUSG00000004814	12.8986	5.25258	1.41462	-3.71306	0.000204765	0.00210685	Ccl24
ENSMUSG00000034570	330.966	5.25248	0.917579	-5.72428	1.03872e-08	3.31292e-07	Inpp5j
ENSMUSG00000015854	147.277	5.24031	0.941902	-5.56354	2.64358e-08	7.65249e-07	Cd5l
ENSMUSG00000021322	1745.76	5.23089	0.660209	-7.92308	2.3169e-15	3.39649e-13	Aoah
ENSMUSG00000043557	21.1283	5.22514	1.20786	-4.32595	1.51879e-05	0.0002296	Mdga1
ENSMUSG00000029082	828.642	5.22151	0.704457	-7.4121	1.24314e-13	1.19663e-11	Bst1
ENSMUSG00000014361	403.001	5.2196	0.601363	-8.67963	3.97058e-18	9.61302e-16	Mertk
ENSMUSG00000098055	12.0702	5.20928	1.41282	-3.68714	0.000226788	0.00229793	Gm26947
ENSMUSG00000108239	20.4414	5.20314	1.20087	-4.33281	1.47217e-05	0.000222974	Gm19434
ENSMUSG00000015568	336.027	5.19994	0.651701	-7.97903	1.47491e-15	2.28811e-13	Lpl
ENSMUSG00000027533	336.658	5.19932	0.619587	-8.3916	4.79578e-17	9.95219e-15	Fabp5
ENSMUSG00000074419	183.83	5.19478	0.715411	-7.26125	3.83524e-13	3.25975e-11	Gm15448
ENSMUSG00000022534	1404.11	5.17977	0.573986	-9.02422	1.80982e-19	5.78382e-17	Mefv
ENSMUSG00000086813	20.1079	5.17917	1.2032	-4.30449	1.67368e-05	0.000248779	Gm13657
ENSMUSG00000041707	90.8694	5.17863	0.825693	-6.27186	3.56761e-10	1.52425e-08	1810011H11Rik
ENSMUSG00000045065	20.3092	5.17784	1.20908	-4.28245	1.84849e-05	0.000270238	9930022D16Rik
ENSMUSG00000018459	181.84	5.17112	0.743833	-6.95198	3.60188e-12	2.43385e-10	Slc13a3
ENSMUSG00000050395	108.867	5.16562	0.873446	-5.91406	3.33769e-09	1.15888e-07	Tnfsf15
ENSMUSG00000024397	11070.9	5.16191	0.637147	-8.10159	5.42463e-16	9.12423e-14	Aif1
ENSMUSG00000050777	865.099	5.15101	0.70145	-7.34337	2.08275e-13	1.88024e-11	Tmem37
ENSMUSG00000101024	20.9605	5.13172	1.20244	-4.26776	1.97446e-05	0.000285354	Gm5692
ENSMUSG00000013766	11.1773	5.11649	1.41639	-3.61234	0.000303444	0.00294137	Ly6g6e
ENSMUSG00000029490	70.7167	5.1138	0.830142	-6.16016	7.26738e-10	2.8959e-08	Mfsd7a
ENSMUSG00000027848	1633.49	5.1121	0.575105	-8.88898	6.16707e-19	1.75971e-16	Olfml3
ENSMUSG00000108402	712.502	5.10372	0.584136	-8.73723	2.38901e-18	5.96468e-16	RP23-325D10.4
ENSMUSG00000030206	20.2489	5.10346	1.19759	-4.26143	2.03124e-05	0.000291881	Gsg1
ENSMUSG00000029470	6881.8	5.10241	0.533252	-9.56849	1.08477e-21	5.41672e-19	P2rx4
ENSMUSG00000025165	674.094	5.09304	0.579889	-8.78277	1.59491e-18	4.11051e-16	Sectm1a
ENSMUSG00000021190	63073.2	5.09027	0.616186	-8.26093	1.4454e-16	2.74952e-14	Lgmn
ENSMUSG00000095419	36.154	5.08791	1.0287	-4.94597	7.57652e-07	1.58878e-05	Gm14328
ENSMUSG00000000154	18.8769	5.08568	1.2127	-4.19368	2.74464e-05	0.000377424	Slc22a18
ENSMUSG00000017652	1164.55	5.08032	0.621791	-8.17046	3.0722e-16	5.39459e-14	Cd40
ENSMUSG00000079547	8137.19	5.07265	0.545045	-9.30684	1.31696e-20	4.8875e-18	H2-DMb1
ENSMUSG00000010307	1516.56	5.07096	0.745477	-6.8023	1.02963e-11	6.13895e-10	Tmem86a
ENSMUSG00000044827	2323.28	5.06762	0.566366	-8.9476	3.63293e-19	1.11636e-16	Tlr1
ENSMUSG00000072844	213.565	5.06023	0.827334	-6.11631	9.57656e-10	3.68732e-08	G530011O06Rik
ENSMUSG00000102975	187.342	5.05895	0.9518	-5.31514	1.06576e-07	2.69886e-06	Gm37347
ENSMUSG00000046323	18.7447	5.04607	1.22621	-4.11518	3.86885e-05	0.00051049	Dppa3
ENSMUSG00000033825	42.5087	5.03602	1.1657	-4.32015	1.5592e-05	0.000235264	Tpsb2
ENSMUSG00000021720	284.242	5.02571	0.720761	-6.97279	3.10724e-12	2.15872e-10	Rnf180
ENSMUSG00000093327	59.6912	5.01456	0.859498	-5.83429	5.40214e-09	1.80966e-07	Mir5107
ENSMUSG00000030344	10.9668	5.01068	1.43601	-3.48931	0.000484277	0.00436697	Akap3
ENSMUSG00000026321	139.882	4.99591	0.702672	-7.10987	1.16148e-12	8.88008e-11	Tnfrsf11a
ENSMUSG00000026065	10.4612	4.97926	1.4319	-3.47738	0.00050633	0.00453512	Slc9a4
ENSMUSG00000032091	17.5429	4.97377	1.22534	-4.0591	4.92623e-05	0.000625984	Tmprss4
ENSMUSG00000021423	3453.54	4.96315	0.542762	-9.14424	6.00515e-20	1.99909e-17	Ly86
ENSMUSG00000033210	10.2506	4.95264	1.4352	-3.45083	0.000558861	0.00491742	Slc9c1
ENSMUSG00000035852	32.9758	4.9501	1.04295	-4.74624	2.07232e-06	3.90951e-05	Misp
ENSMUSG00000001249	24.9873	4.94803	1.11175	-4.45065	8.56095e-06	0.000137899	Hpn
ENSMUSG00000097848	17.2386	4.94314	1.22856	-4.02353	5.73316e-05	0.000714031	Gm807
ENSMUSG00000045625	103.255	4.94122	0.740026	-6.67709	2.43738e-11	1.32472e-09	Pigz
ENSMUSG00000024013	4175.24	4.93895	0.778364	-6.3453	2.21987e-10	9.93594e-09	Fgd2
ENSMUSG00000017754	7714.64	4.9284	0.553776	-8.89962	5.60376e-19	1.62805e-16	Pltp
ENSMUSG00000085109	32.2796	4.92564	1.04247	-4.72496	2.30158e-06	4.30644e-05	Gm15356
ENSMUSG00000106609	100.233	4.9114	0.794742	-6.17987	6.41543e-10	2.56932e-08	Gm43181
ENSMUSG00000026628	1282.19	4.9085	0.552755	-8.88007	6.68196e-19	1.87318e-16	Atf3
ENSMUSG00000074677	9.76497	4.9024	1.43617	-3.41352	0.000641301	0.00550341	Sirpb1c
ENSMUSG00000045326	31.7694	4.89984	1.04559	-4.68621	2.78307e-06	5.09984e-05	Fndc7
ENSMUSG00000036896	19409.3	4.89769	0.587288	-8.3395	7.46055e-17	1.50901e-14	C1qc
ENSMUSG00000020604	31.9012	4.8946	1.01862	-4.80511	1.54665e-06	3.01021e-05	Arsg
ENSMUSG00000058818	6939.85	4.88743	0.597117	-8.18505	2.72183e-16	4.83246e-14	Pirb
ENSMUSG00000031551	36.1023	4.88434	1.04865	-4.65774	3.19702e-06	5.77887e-05	Ido1
ENSMUSG00000063659	56.8247	4.87667	0.887337	-5.49585	3.88843e-08	1.08246e-06	Zbtb18
ENSMUSG00000063234	270.623	4.87409	0.652811	-7.46632	8.24697e-14	8.3404e-12	Gpr84
ENSMUSG00000035493	15577.7	4.87109	0.786331	-6.1947	5.83953e-10	2.36827e-08	Tgfbi
ENSMUSG00000026807	16.3411	4.86493	1.23635	-3.93492	8.32253e-05	0.00098508	Ak8
ENSMUSG00000031387	1549.8	4.84688	0.55826	-8.68211	3.88493e-18	9.55035e-16	Renbp
ENSMUSG00000025279	3143.05	4.84581	0.547188	-8.85583	8.3063e-19	2.2496e-16	Dnase1l3
ENSMUSG00000016283	78.3657	4.81933	0.809605	-5.9527	2.63755e-09	9.36566e-08	H2-M2
ENSMUSG00000068606	101.131	4.81896	0.730865	-6.5935	4.29563e-11	2.22857e-09	Gm4841
ENSMUSG00000027221	23.4072	4.81745	1.10274	-4.36863	1.25029e-05	0.000193214	Chst1
ENSMUSG00000037636	71.3531	4.81536	0.821737	-5.85998	4.62935e-09	1.56721e-07	Slc25a43
ENSMUSG00000038527	261.617	4.80998	0.637676	-7.54299	4.59317e-14	4.95908e-12	C1rl
ENSMUSG00000042289	24.0695	4.80914	1.12505	-4.27462	1.9146e-05	0.00027787	Hsd3b7
ENSMUSG00000026458	1786.92	4.80797	0.683618	-7.03313	2.01953e-12	1.45361e-10	Ppfia4
ENSMUSG00000032554	279.525	4.80632	0.673092	-7.14065	9.28895e-13	7.34793e-11	Trf
ENSMUSG00000104068	15.5957	4.8002	1.24258	-3.86308	0.000111966	0.00127067	Gm37199
ENSMUSG00000096992	9.04881	4.78751	1.4451	-3.31292	0.000923265	0.00750781	Gm26788
ENSMUSG00000004730	17700.1	4.78052	0.535847	-8.92144	4.60281e-19	1.36201e-16	Adgre1
ENSMUSG00000026220	9.09799	4.77917	1.44844	-3.29953	0.000968466	0.00779603	Slc16a14
ENSMUSG00000041797	376.898	4.77759	0.629487	-7.58966	3.20755e-14	3.71401e-12	Abca9
ENSMUSG00000038508	52.0689	4.76217	0.941864	-5.05611	4.27895e-07	9.47e-06	Gdf15
ENSMUSG00000015968	69.8986	4.76057	0.794002	-5.99567	2.02654e-09	7.35957e-08	Cacna1d
ENSMUSG00000097857	22.0643	4.75809	1.13422	-4.19504	2.72818e-05	0.000375483	Gm26603
ENSMUSG00000093695	8.99502	4.74942	1.45245	-3.26993	0.00107573	0.00853483	Gm20717
ENSMUSG00000029919	1960.94	4.74933	0.631757	-7.51765	5.57691e-14	5.90155e-12	Hpgds
ENSMUSG00000020892	8.81829	4.74501	1.44894	-3.27481	0.00105734	0.00840561	Aloxe3
ENSMUSG00000030144	950.663	4.735	0.623491	-7.59434	3.09377e-14	3.63184e-12	Clec4d
ENSMUSG00000027995	4202.12	4.73101	0.545908	-8.66631	4.46365e-18	1.06455e-15	Tlr2
ENSMUSG00000020053	93.875	4.72561	0.783047	-6.03489	1.59068e-09	5.91103e-08	Igf1
ENSMUSG00000033740	28.101	4.71933	1.06407	-4.43518	9.19971e-06	0.000147149	St18
ENSMUSG00000026981	2902.63	4.71806	0.622058	-7.5846	3.33514e-14	3.80659e-12	Il1rn
ENSMUSG00000091659	8.61236	4.70794	1.45246	-3.24136	0.0011896	0.00931799	Gm17099
ENSMUSG00000000958	1393.85	4.69937	0.551354	-8.52334	1.55019e-17	3.30273e-15	Slc7a7
ENSMUSG00000073555	2602.44	4.69885	0.649126	-7.23873	4.52899e-13	3.78894e-11	Gm4951
ENSMUSG00000048489	14.5953	4.69759	1.25484	-3.74357	0.000181425	0.00190723	8430408G22Rik
ENSMUSG00000028573	116.908	4.69221	0.790814	-5.9334	2.96726e-09	1.04206e-07	Fggy
ENSMUSG00000086695	8.4848	4.68404	1.45435	-3.22072	0.00127868	0.00984756	Gm15247
ENSMUSG00000102895	8.56318	4.67944	1.45629	-3.21327	0.00131233	0.0100671	5830415G21Rik
ENSMUSG00000043157	556.072	4.67898	0.579597	-8.07281	6.87007e-16	1.13172e-13	Arl11
ENSMUSG00000046463	34.2339	4.67888	0.961552	-4.86597	1.13897e-06	2.27495e-05	5930403N24Rik
ENSMUSG00000028108	7577.67	4.66947	0.568406	-8.21503	2.12103e-16	3.89562e-14	Ecm1
ENSMUSG00000031504	1062.22	4.66772	0.567407	-8.22641	1.92909e-16	3.58429e-14	Rab20
ENSMUSG00000019990	170.863	4.66345	0.673171	-6.92759	4.28057e-12	2.7918e-10	Pde7b
ENSMUSG00000028459	25585.1	4.65698	0.570594	-8.16164	3.30506e-16	5.74039e-14	Cd72
ENSMUSG00000039699	680.604	4.65457	0.602958	-7.71957	1.16726e-14	1.50416e-12	Batf2
ENSMUSG00000105769	15.3987	4.65374	1.2523	-3.71615	0.000202284	0.0020867	Gm43351
ENSMUSG00000061175	229.482	4.65322	0.661442	-7.03496	1.99317e-12	1.44113e-10	Fnip2
ENSMUSG00000051043	46.5446	4.65255	0.976348	-4.76526	1.88609e-06	3.60356e-05	Gprc5c
ENSMUSG00000079164	120.058	4.65173	0.779692	-5.96612	2.42966e-09	8.68535e-08	Tlr5
ENSMUSG00000032359	15758.2	4.65034	0.614328	-7.56981	3.7378e-14	4.14766e-12	Ctsh
ENSMUSG00000047798	3654.77	4.64554	0.560743	-8.28462	1.18489e-16	2.30895e-14	Cd300lf
ENSMUSG00000024610	408631	4.64228	0.635916	-7.30014	2.87459e-13	2.52379e-11	Cd74
ENSMUSG00000058672	659.549	4.64094	0.590371	-7.86105	3.80941e-15	5.2931e-13	Tubb2a
ENSMUSG00000047747	45.5887	4.62466	0.978331	-4.72709	2.2776e-06	4.27158e-05	Rnf150
ENSMUSG00000000149	323.652	4.60942	0.638759	-7.21621	5.34551e-13	4.35795e-11	Gna12
ENSMUSG00000060183	45.7184	4.60443	0.904689	-5.08951	3.58991e-07	8.06796e-06	Cxcl11
ENSMUSG00000035148	14.6825	4.60225	1.25206	-3.67573	0.000237172	0.00238201	Gpr33
ENSMUSG00000020377	83.2354	4.59385	0.836707	-5.49039	4.01042e-08	1.11061e-06	Ltc4s
ENSMUSG00000046456	55.7463	4.59326	0.828681	-5.54286	2.97578e-08	8.55216e-07	Tmem150b
ENSMUSG00000089669	34.2028	4.58885	0.988464	-4.64241	3.4437e-06	6.1209e-05	Tnfsf13
ENSMUSG00000108004	8.07293	4.58857	1.46503	-3.13207	0.00173576	0.0126995	Gm44080
ENSMUSG00000087135	43.541	4.5879	0.889008	-5.1607	2.46033e-07	5.76445e-06	Gm16096
ENSMUSG00000049848	78.3686	4.57979	0.78884	-5.80573	6.40863e-09	2.12016e-07	Ceacam19
ENSMUSG00000032679	8.61697	4.57677	1.47573	-3.10136	0.00192634	0.0139007	Cd59a
ENSMUSG00000038473	7.94537	4.5727	1.46519	-3.12089	0.00180303	0.0131435	Nos1ap
ENSMUSG00000106202	7.94537	4.5727	1.46519	-3.12089	0.00180303	0.0131435	Gm43727
ENSMUSG00000074194	13.6194	4.57251	1.27496	-3.58639	0.00033529	0.00319285	Zfp791
ENSMUSG00000097224	308.497	4.56762	0.600426	-7.60729	2.79894e-14	3.3882e-12	Gm26716
ENSMUSG00000004609	148.433	4.56691	0.744142	-6.13715	8.40135e-10	3.28226e-08	Cd33
ENSMUSG00000066861	1049.65	4.56564	0.600922	-7.59773	3.01373e-14	3.56714e-12	Oas1g
ENSMUSG00000002076	8.22507	4.56069	1.4737	-3.09471	0.00197003	0.0141734	Hsf2bp
ENSMUSG00000034708	20135.6	4.55593	0.678654	-6.71319	1.90415e-11	1.05647e-09	Grn
ENSMUSG00000053338	522.387	4.55484	0.57672	-7.89783	2.83796e-15	4.12253e-13	Tarm1
ENSMUSG00000081169	7.81782	4.55116	1.46638	-3.10367	0.00191139	0.0138199	Gm12551
ENSMUSG00000104653	82.6352	4.54802	0.814609	-5.58308	2.36297e-08	6.97929e-07	Gm43109
ENSMUSG00000097754	32.7905	4.53782	0.986586	-4.59952	4.23472e-06	7.37109e-05	Ptgs2os2
ENSMUSG00000015745	1063.38	4.53722	0.577056	-7.8627	3.75935e-15	5.2931e-13	Plekho1
ENSMUSG00000100060	66.5527	4.53493	0.795567	-5.70025	1.19629e-08	3.76291e-07	Gm17944
ENSMUSG00000102715	7.97458	4.52804	1.47283	-3.07438	0.00210943	0.0150543	Gm6209
ENSMUSG00000022504	1543.2	4.52115	0.706167	-6.40238	1.52972e-10	7.00383e-09	Ciita
ENSMUSG00000026170	931.077	4.52005	0.558333	-8.09562	5.6974e-16	9.48321e-14	Cyp27a1
ENSMUSG00000041268	130.864	4.51234	0.753994	-5.98459	2.16941e-09	7.82504e-08	Dmxl2
ENSMUSG00000058163	437.732	4.50421	0.688839	-6.53885	6.19957e-11	3.1349e-09	Gm5431
ENSMUSG00000048824	29.1712	4.50089	1.10795	-4.06234	4.85833e-05	0.000618576	Gm568
ENSMUSG00000030148	2209.84	4.49929	0.65066	-6.91497	4.67977e-12	3.00313e-10	Clec4a2
ENSMUSG00000103676	7.61188	4.49842	1.47231	-3.05535	0.00224797	0.0158799	Gm38204
ENSMUSG00000013584	13.785	4.49778	1.26507	-3.55535	0.000377472	0.00353554	Aldh1a2
ENSMUSG00000090942	1084.08	4.49375	0.772958	-5.81371	6.1103e-09	2.03027e-07	F830016B08Rik
ENSMUSG00000034855	1446.99	4.49198	0.592238	-7.58476	3.3309e-14	3.80659e-12	Cxcl10
ENSMUSG00000024673	13.2167	4.48931	1.29034	-3.47917	0.000502977	0.0045152	Ms4a1
ENSMUSG00000049119	12.7265	4.48686	1.27795	-3.51098	0.000446454	0.00408118	Fam110b
ENSMUSG00000036908	17803.3	4.47781	0.718374	-6.23326	4.56831e-10	1.90593e-08	Unc93b1
ENSMUSG00000026548	2864.11	4.47743	0.685556	-6.53109	6.52935e-11	3.29124e-09	Slamf9
ENSMUSG00000026814	443.034	4.47618	0.769998	-5.81324	6.12738e-09	2.03132e-07	Eng
ENSMUSG00000000957	965.404	4.47586	0.727984	-6.1483	7.83182e-10	3.0825e-08	Mmp14
ENSMUSG00000034947	5284.16	4.47576	0.546809	-8.18523	2.71786e-16	4.83246e-14	Tmem106a
ENSMUSG00000030865	7.84702	4.46873	1.48087	-3.01764	0.0025475	0.017599	Chp2
ENSMUSG00000056529	1032.05	4.4671	0.562851	-7.93655	2.07875e-15	3.13361e-13	Ptafr
ENSMUSG00000028463	104.732	4.4584	0.716423	-6.22314	4.87297e-10	2.01723e-08	Car9
ENSMUSG00000045658	4673.96	4.4541	0.540823	-8.23578	1.78397e-16	3.35366e-14	Pid1
ENSMUSG00000036912	13.5345	4.454	1.27088	-3.50465	0.000457204	0.00416277	Piwil4
ENSMUSG00000086717	44.7767	4.44553	0.878032	-5.06306	4.12571e-07	9.16894e-06	Gm15655
ENSMUSG00000086637	7.5335	4.43376	1.48298	-2.98977	0.00279186	0.0189915	Gm14040
ENSMUSG00000081665	160.276	4.42983	0.657157	-6.74091	1.574e-11	8.95717e-10	Gm15922
ENSMUSG00000038235	3649.51	4.41878	0.557357	-7.92811	2.2251e-15	3.29212e-13	F11r
ENSMUSG00000044042	207.1	4.41575	0.706308	-6.25188	4.0554e-10	1.71432e-08	Fmn1
ENSMUSG00000023349	3718.47	4.41271	0.717713	-6.14829	7.83213e-10	3.0825e-08	Clec4n
ENSMUSG00000062127	1278.04	4.41224	0.730844	-6.0372	1.56816e-09	5.85459e-08	Cttnbp2nl
ENSMUSG00000051435	49.0384	4.40467	0.874527	-5.03663	4.73804e-07	1.03428e-05	Fhad1
ENSMUSG00000021822	28.1933	4.39622	1.05581	-4.16382	3.12963e-05	0.000425965	Plau
ENSMUSG00000074281	17.6149	4.39127	1.14665	-3.82966	0.00012832	0.00142094	Gm12522
ENSMUSG00000044350	738.505	4.39119	0.566904	-7.74591	9.48985e-15	1.25321e-12	Lacc1
ENSMUSG00000063506	493.423	4.38321	0.970507	-4.51641	6.28966e-06	0.000105128	Arhgap22
ENSMUSG00000053040	459.038	4.38234	0.654152	-6.69927	2.09461e-11	1.15016e-09	Aph1c
ENSMUSG00000027315	710.034	4.38074	0.696596	-6.28877	3.19984e-10	1.3819e-08	Spint1
ENSMUSG00000029810	4971.14	4.376	0.592349	-7.38754	1.49574e-13	1.41423e-11	Tmem176b
ENSMUSG00000086860	7.02328	4.37582	1.48181	-2.95303	0.00314673	0.0210449	Gm1720
ENSMUSG00000024164	3102.69	4.3739	0.579411	-7.54886	4.39085e-14	4.77288e-12	C3
ENSMUSG00000105355	63.8923	4.37124	0.886308	-4.93196	8.14076e-07	1.69376e-05	Gm42956
ENSMUSG00000096957	212.688	4.36148	0.623133	-6.99928	2.57283e-12	1.81107e-10	E230013L22Rik
ENSMUSG00000092354	32.7393	4.36077	1.02449	-4.25652	2.07632e-05	0.000297023	Gm20548
ENSMUSG00000026389	147.925	4.35938	0.851831	-5.11766	3.09345e-07	7.06146e-06	Steap3
ENSMUSG00000087639	359.949	4.35911	0.940297	-4.63589	3.5541e-06	6.29611e-05	Gm15512
ENSMUSG00000036611	211.648	4.35802	0.629781	-6.91989	4.52001e-12	2.91231e-10	Eepd1
ENSMUSG00000102752	11.6231	4.35358	1.2926	-3.36807	0.000756967	0.00633276	Gm7694
ENSMUSG00000063458	79.2603	4.34947	0.747763	-5.81665	6.00403e-09	2.00289e-07	1700112E06Rik
ENSMUSG00000029372	6.92031	4.34865	1.48463	-2.92911	0.00339933	0.0224547	Ppbp
ENSMUSG00000020432	3057.52	4.34834	0.536713	-8.10179	5.41545e-16	9.12423e-14	Tcn2
ENSMUSG00000090936	22.1074	4.34452	1.11213	-3.90648	9.36503e-05	0.00108516	Gm17705
ENSMUSG00000100121	7.28301	4.33974	1.49231	-2.90807	0.0036367	0.0236511	1700025N23Rik
ENSMUSG00000033705	332.84	4.32741	0.75874	-5.70342	1.17425e-08	3.70085e-07	Stard9
ENSMUSG00000060512	245.365	4.32449	0.865308	-4.99763	5.80395e-07	1.24652e-05	0610040J01Rik
ENSMUSG00000040264	2751.31	4.32413	0.705114	-6.13253	8.64917e-10	3.33829e-08	Gbp2b
ENSMUSG00000097816	16.4534	4.32181	1.18038	-3.66137	0.00025087	0.00250259	Gm26811
ENSMUSG00000079298	957.231	4.31918	0.586412	-7.36543	1.76575e-13	1.63092e-11	Klrb1b
ENSMUSG00000092591	12.1468	4.31745	1.2801	-3.37275	0.00074422	0.00625157	Gm20429
ENSMUSG00000037649	9008.54	4.31677	0.619562	-6.96745	3.22734e-12	2.22283e-10	H2-DMa
ENSMUSG00000027398	4308.56	4.31558	0.621988	-6.93837	3.96653e-12	2.62993e-10	Il1b
ENSMUSG00000005413	1629.28	4.3058	0.679911	-6.33289	2.40607e-10	1.07393e-08	Hmox1
ENSMUSG00000028458	4621.24	4.29893	0.587553	-7.31666	2.54214e-13	2.25671e-11	Tesk1
ENSMUSG00000030774	974.794	4.29766	0.603939	-7.11605	1.11065e-12	8.6151e-11	Pak1
ENSMUSG00000047875	41.6837	4.2944	0.994998	-4.31599	1.58889e-05	0.0002378	Gpr157
ENSMUSG00000050022	436.801	4.29265	0.759612	-5.65111	1.59418e-08	4.90816e-07	Amz1
ENSMUSG00000085135	11.9409	4.28623	1.28508	-3.33537	0.00085185	0.00700551	Gm13713
ENSMUSG00000006344	114.337	4.28593	0.839512	-5.10526	3.30336e-07	7.48715e-06	Ggt5
ENSMUSG00000097423	306.14	4.28159	0.684035	-6.25932	3.86651e-10	1.6388e-08	Gm26522
ENSMUSG00000022236	51.5548	4.28051	0.82925	-5.1619	2.44453e-07	5.74524e-06	Ropn1l
ENSMUSG00000000204	321.108	4.28039	0.728199	-5.87804	4.1514e-09	1.4144e-07	Slfn4
ENSMUSG00000052821	1290.22	4.27229	0.693387	-6.16148	7.20699e-10	2.87901e-08	Cysltr1
ENSMUSG00000102437	6.84655	4.27116	1.49534	-2.85631	0.00428599	0.0271339	Gm38048
ENSMUSG00000036412	36.4323	4.26673	1.0342	-4.12561	3.6975e-05	0.000490717	Arsi
ENSMUSG00000052248	229.587	4.26664	0.736045	-5.79671	6.76277e-09	2.22809e-07	Zeb2os
ENSMUSG00000049709	6.56223	4.26359	1.49143	-2.85872	0.00425356	0.0269499	Nlrp10
ENSMUSG00000097597	6.56223	4.26359	1.49143	-2.85872	0.00425356	0.0269499	Gm26674
ENSMUSG00000019944	20.798	4.26341	1.11663	-3.8181	0.000134482	0.00147792	Rhobtb1
ENSMUSG00000081723	688.391	4.26106	0.565983	-7.52859	5.12906e-14	5.46381e-12	Gm15931
ENSMUSG00000023367	1495.99	4.25872	0.548017	-7.77115	7.7776e-15	1.04436e-12	Tmem176a
ENSMUSG00000101655	80.5114	4.25865	0.873935	-4.87295	1.09942e-06	2.20421e-05	2310040G24Rik
ENSMUSG00000020100	3342.88	4.25861	0.714434	-5.96082	2.50978e-09	8.93179e-08	Slc29a3
ENSMUSG00000073412	2286.95	4.25567	0.586236	-7.25931	3.89062e-13	3.28932e-11	Lst1
ENSMUSG00000015243	1367.06	4.24953	0.560565	-7.5808	3.43424e-14	3.89189e-12	Abca1
ENSMUSG00000044708	12.0395	4.24938	1.33886	-3.17388	0.00150415	0.011247	Kcnj10
ENSMUSG00000001270	1616.35	4.24769	0.590062	-7.19872	6.07824e-13	4.90527e-11	Ckb
ENSMUSG00000045709	6.45927	4.23725	1.49391	-2.83635	0.00456317	0.0285941	Smkr-ps
ENSMUSG00000014782	12.7173	4.23678	1.36438	-3.10527	0.00190107	0.0137578	Plekhg4
ENSMUSG00000087598	91.292	4.23433	0.713593	-5.93382	2.95971e-09	1.0417e-07	Zfp111
ENSMUSG00000054203	1386.44	4.22753	0.699686	-6.04205	1.52173e-09	5.69454e-08	Ifi205
ENSMUSG00000031903	2212.74	4.21613	0.618184	-6.82019	9.09221e-12	5.48243e-10	Pla2g15
ENSMUSG00000036528	138.36	4.20381	0.677112	-6.20844	5.35145e-10	2.18816e-08	Ppfibp2
ENSMUSG00000028121	6.71899	4.1984	1.50463	-2.79032	0.00526556	0.0322069	Bcar3
ENSMUSG00000056124	128.411	4.18937	0.696633	-6.01374	1.81291e-09	6.62893e-08	B4galt6
ENSMUSG00000103032	6.38089	4.186	1.50153	-2.78782	0.00530633	0.0323873	Gm37121
ENSMUSG00000033192	5953.67	4.18179	0.550162	-7.60102	2.93807e-14	3.52038e-12	Lpcat2
ENSMUSG00000044788	15.0164	4.17904	1.2003	-3.48166	0.000498314	0.00448342	Fads6
ENSMUSG00000030323	121.676	4.17815	0.69231	-6.03508	1.5888e-09	5.91103e-08	Ift122
ENSMUSG00000030737	12.4514	4.17686	1.37132	-3.04586	0.00232019	0.0163036	Slco2b1
ENSMUSG00000072115	76.1434	4.17533	0.758683	-5.50339	3.72561e-08	1.04258e-06	Ang
ENSMUSG00000087545	42.0554	4.17139	0.932665	-4.47255	7.72922e-06	0.000126542	Gm13966
ENSMUSG00000005057	147.818	4.17001	1.01236	-4.11911	3.80342e-05	0.000502272	Sh2b2
ENSMUSG00000021250	14067	4.16979	0.586031	-7.1153	1.11668e-12	8.62002e-11	Fos
ENSMUSG00000028111	62.7391	4.16887	0.907562	-4.59348	4.35914e-06	7.57117e-05	Ctsk
ENSMUSG00000051727	10.2645	4.16223	1.31527	-3.16455	0.00155324	0.0115707	Kctd14
ENSMUSG00000041012	6.20416	4.16083	1.5007	-2.7726	0.00556112	0.0335578	Cmtm8
ENSMUSG00000061132	384.567	4.15809	0.64425	-6.45416	1.08819e-10	5.19051e-09	Blnk
ENSMUSG00000031712	203.294	4.15379	0.802331	-5.17715	2.25296e-07	5.36512e-06	Il15
ENSMUSG00000025743	1087.4	4.15066	0.703307	-5.90164	3.59914e-09	1.23679e-07	Sdc3
ENSMUSG00000066152	2348.37	4.15034	0.547925	-7.57465	3.60101e-14	4.05215e-12	Slc31a2
ENSMUSG00000051439	6114.27	4.14454	0.63136	-6.56446	5.22228e-11	2.65754e-09	Cd14
ENSMUSG00000016256	25972.1	4.14446	0.579664	-7.14976	8.69281e-13	6.91056e-11	Ctsz
ENSMUSG00000073490	4152.01	4.14408	0.597161	-6.93964	3.93107e-12	2.61727e-10	AI607873
ENSMUSG00000000318	198.011	4.14387	0.680175	-6.09236	1.11257e-09	4.23281e-08	Clec10a
ENSMUSG00000055485	52.394	4.14022	1.00138	-4.13449	3.5574e-05	0.000475679	Soga1
ENSMUSG00000093672	19.5713	4.13854	1.11164	-3.72293	0.000196923	0.0020446	Gm20655
ENSMUSG00000027737	154.766	4.13524	0.767976	-5.38459	7.26088e-08	1.91771e-06	Slc7a11
ENSMUSG00000097328	64.5129	4.1316	0.774398	-5.33524	9.54169e-08	2.45518e-06	Tnfsf12
ENSMUSG00000039911	247.492	4.12337	0.85474	-4.82412	1.40621e-06	2.76722e-05	Spsb1
ENSMUSG00000029816	508.512	4.11767	0.583535	-7.05643	1.70839e-12	1.25799e-10	Gpnmb
ENSMUSG00000043085	5.99822	4.1147	1.50414	-2.73558	0.00622704	0.036595	Tmem82
ENSMUSG00000030427	104.237	4.11425	0.698496	-5.89016	3.85831e-09	1.32017e-07	Lilra6
ENSMUSG00000062991	328.677	4.11309	0.612525	-6.71498	1.88094e-11	1.04723e-09	Nrg1
ENSMUSG00000024340	6.02281	4.11212	1.5056	-2.73121	0.00631016	0.0368666	Btnl2
ENSMUSG00000087263	18.7076	4.11187	1.08716	-3.78223	0.000155432	0.00167474	Gm15726
ENSMUSG00000049988	1931.65	4.10126	0.599978	-6.83568	8.16163e-12	4.97766e-10	Lrrc25
ENSMUSG00000101279	9.98019	4.09738	1.32979	-3.08123	0.0020615	0.0147386	Gm18342
ENSMUSG00000054931	9.82805	4.09389	1.32428	-3.09141	0.00199206	0.0143062	Zkscan4
ENSMUSG00000098050	5.97363	4.09308	1.50668	-2.71661	0.0065954	0.0382394	Gm5345
ENSMUSG00000029553	185.225	4.09244	0.843066	-4.85423	1.20854e-06	2.4019e-05	Tfec
ENSMUSG00000040466	1122.57	4.08865	0.609969	-6.70304	2.04132e-11	1.12477e-09	Blvrb
ENSMUSG00000108808	5.89525	4.08488	1.50692	-2.71074	0.00671335	0.0388387	RP23-325D10.5
ENSMUSG00000030214	15637.4	4.08328	0.578961	-7.05277	1.75388e-12	1.27969e-10	Plbd1
ENSMUSG00000038068	90.055	4.08043	0.710035	-5.7468	9.09507e-09	2.93596e-07	Rnf144b
ENSMUSG00000059498	22209.2	4.07942	0.714225	-5.71167	1.1187e-08	3.54676e-07	Fcgr3
ENSMUSG00000058542	16.9706	4.07552	1.23106	-3.31057	0.000931054	0.00755194	Gm15590
ENSMUSG00000021477	6774.16	4.07337	0.545354	-7.46923	8.06677e-14	8.21012e-12	Ctsl
ENSMUSG00000029380	5.91984	4.07069	1.51025	-2.69539	0.00703073	0.0403245	Cxcl1
ENSMUSG00000097899	31.0743	4.07001	0.952939	-4.27101	1.94586e-05	0.000281893	Gm16894
ENSMUSG00000022817	690.537	4.06807	0.602332	-6.75387	1.4395e-11	8.30388e-10	Itgb5
ENSMUSG00000106472	10.2599	4.06728	1.35076	-3.0111	0.00260306	0.0179363	Gm43111
ENSMUSG00000055172	247.26	4.06616	0.758793	-5.35872	8.38145e-08	2.19553e-06	C1ra
ENSMUSG00000055435	811.392	4.06523	0.597885	-6.79936	1.05083e-11	6.24206e-10	Maf
ENSMUSG00000083822	88.8059	4.06464	0.727169	-5.58967	2.27496e-08	6.73178e-07	Hmgb1-ps5
ENSMUSG00000040711	400.756	4.06181	0.603221	-6.73354	1.65589e-11	9.38282e-10	Sh3pxd2b
ENSMUSG00000107428	14.0833	4.05104	1.18139	-3.42905	0.000605702	0.00526579	Gm44154
ENSMUSG00000021638	5.7677	4.04859	1.50965	-2.68181	0.00732245	0.0418624	Ocln
ENSMUSG00000046687	2258.57	4.047	0.630208	-6.42169	1.34774e-10	6.22415e-09	Gm5424
ENSMUSG00000047678	142.808	4.04695	0.973708	-4.15622	3.23553e-05	0.000438885	Gpr82
ENSMUSG00000044206	6.05201	4.04596	1.51533	-2.67001	0.00758487	0.0429935	Vsig4
ENSMUSG00000020388	541.865	4.04434	0.579535	-6.9786	2.98141e-12	2.08947e-10	Pdlim4
ENSMUSG00000076441	257.105	4.04364	0.692563	-5.83866	5.26227e-09	1.77023e-07	Ass1
ENSMUSG00000021363	5.94904	4.04309	1.51375	-2.67091	0.0075646	0.0428938	Mak
ENSMUSG00000046207	583.483	4.0404	0.775306	-5.21136	1.87459e-07	4.53849e-06	Pik3r6
ENSMUSG00000038642	107920	4.03166	0.65708	-6.13572	8.47755e-10	3.29297e-08	Ctss
ENSMUSG00000092415	6.43007	4.02764	1.52608	-2.63921	0.00831005	0.046084	Gm20513
ENSMUSG00000024885	2714.17	4.02166	0.545039	-7.37866	1.59893e-13	1.49411e-11	Aldh3b1
ENSMUSG00000073805	24.1151	4.02163	1.07143	-3.75352	0.000174369	0.00184887	Fam196a
ENSMUSG00000030098	5.74311	4.02134	1.51299	-2.65787	0.0078636	0.0441509	Grip2
ENSMUSG00000107075	5.66473	4.01927	1.51222	-2.65787	0.00786366	0.0441509	Gm43068
ENSMUSG00000059412	14.3833	4.01713	1.25277	-3.2066	0.00134313	0.0102394	Fxyd2
ENSMUSG00000050967	97.9483	4.01165	0.71645	-5.59934	2.15171e-08	6.39075e-07	Creg2
ENSMUSG00000020865	1228.4	4.01151	1.5428	-2.60014	0.00931857	0.050664	Abcc3
ENSMUSG00000018919	43.0654	4.01077	0.852344	-4.70558	2.53151e-06	4.68725e-05	Tm4sf5
ENSMUSG00000064373	16611.8	4.00849	0.609323	-6.57859	4.74934e-11	2.44806e-09	Sepp1
ENSMUSG00000022892	2263.42	4.00799	0.604088	-6.63478	3.24992e-11	1.70824e-09	App
ENSMUSG00000105283	13.9311	4.00657	1.19667	-3.34809	0.000813713	0.00674394	Gm33370
ENSMUSG00000104292	18.1501	4.00394	1.17923	-3.39539	0.000685315	0.00582482	Gm38042
ENSMUSG00000104378	77.8716	4.00227	0.770116	-5.19697	2.02559e-07	4.87353e-06	Gm37510
ENSMUSG00000098098	21.7272	3.99931	1.02569	-3.89913	9.65393e-05	0.00111379	Bvht
ENSMUSG00000025232	5872.63	3.99578	0.544346	-7.34051	2.12784e-13	1.91015e-11	Hexa
ENSMUSG00000059089	8282.69	3.99474	0.69045	-5.78571	7.22067e-09	2.36433e-07	Fcgr4
ENSMUSG00000021559	64.3185	3.98799	0.992811	-4.01687	5.89769e-05	0.000732239	Dapk1
ENSMUSG00000091971	486.842	3.98591	0.821391	-4.85264	1.21829e-06	2.41826e-05	Hspa1a
ENSMUSG00000043940	313.843	3.98538	0.600935	-6.63197	3.31243e-11	1.73539e-09	Wdfy3
ENSMUSG00000025648	849.241	3.98488	0.763352	-5.22024	1.78689e-07	4.35256e-06	Pfkfb4
ENSMUSG00000019302	405.857	3.97925	0.710944	-5.59713	2.17924e-08	6.4605e-07	Atp6v0a1
ENSMUSG00000078144	5.53717	3.97882	1.51542	-2.62555	0.00865082	0.0476825	Capns2
ENSMUSG00000031709	110.114	3.97676	0.762951	-5.21234	1.86473e-07	4.52148e-06	Tbc1d9
ENSMUSG00000023019	9.31321	3.97408	1.34871	-2.94657	0.00321316	0.0214287	Gpd1
ENSMUSG00000053749	53.5679	3.97353	0.79888	-4.97388	6.56264e-07	1.40006e-05	Gm9920
ENSMUSG00000026482	412.088	3.97125	0.63698	-6.23449	4.5326e-10	1.89598e-08	Rgl1
ENSMUSG00000028644	25.8186	3.96562	1.06207	-3.73385	0.000188573	0.00196942	Ermap
ENSMUSG00000020422	304.288	3.96561	0.870317	-4.55651	5.20113e-06	8.88864e-05	Tns3
ENSMUSG00000054675	1647.35	3.95798	0.845006	-4.68397	2.81373e-06	5.15012e-05	Tmem119
ENSMUSG00000095306	5.84146	3.95773	1.52634	-2.59296	0.00951535	0.051506	Gm21807
ENSMUSG00000024737	877.749	3.94913	0.605201	-6.52532	6.78549e-11	3.4096e-09	Slc15a3
ENSMUSG00000086767	12.9171	3.94528	1.22926	-3.20947	0.0013298	0.0101572	Gm13070
ENSMUSG00000053158	1412.64	3.9437	0.738858	-5.33756	9.42069e-08	2.43188e-06	Fes
ENSMUSG00000029413	4112.3	3.94332	0.584499	-6.7465	1.51453e-11	8.67406e-10	Naaa
ENSMUSG00000034488	20.8319	3.94291	1.10943	-3.554	0.000379413	0.00354956	Edil3
ENSMUSG00000039005	865.841	3.9419	0.558785	-7.05441	1.73333e-12	1.2705e-10	Tlr4
ENSMUSG00000071714	501.537	3.9382	0.95358	-4.12991	3.62907e-05	0.000483241	Csf2rb2
ENSMUSG00000097075	59.7092	3.93788	0.900133	-4.37478	1.21554e-05	0.000188392	D830044I16Rik
ENSMUSG00000109291	29.8699	3.93333	1.07944	-3.64385	0.000268591	0.00265576	RP23-366O14.5
ENSMUSG00000096960	8.95513	3.93119	1.3494	-2.91329	0.00357638	0.0233921	A230028O05Rik
ENSMUSG00000059639	28.738	3.92538	0.948318	-4.13931	3.48351e-05	0.000468939	Clec4a4
ENSMUSG00000024661	66530.5	3.9177	0.562041	-6.97049	3.15849e-12	2.18483e-10	Fth1
ENSMUSG00000048200	86.598	3.91068	0.735384	-5.31787	1.04987e-07	2.66283e-06	Cracr2b
ENSMUSG00000090293	5.30665	3.90502	1.52148	-2.56659	0.0102703	0.054611	Gm17034
ENSMUSG00000045075	5.61094	3.89957	1.53009	-2.54858	0.0108162	0.0570591	Gm9796
ENSMUSG00000068697	26.0159	3.89438	1.01308	-3.84411	0.00012099	0.00135574	Myoz1
ENSMUSG00000074805	51.0606	3.89418	0.880993	-4.42022	9.8602e-06	0.000156329	Il1bos
ENSMUSG00000021185	1116.93	3.88762	0.598274	-6.49806	8.13643e-11	4.01272e-09	9030617O03Rik
ENSMUSG00000036172	6.13039	3.88142	1.53742	-2.52462	0.0115822	0.0601079	Cd200r3
ENSMUSG00000039007	1464.62	3.86846	0.614309	-6.29726	3.02959e-10	1.31907e-08	Cpq
ENSMUSG00000041362	430.416	3.86657	0.581865	-6.64513	3.02952e-11	1.61362e-09	Shtn1
ENSMUSG00000035711	2178.48	3.86457	0.826855	-4.67382	2.95643e-06	5.3805e-05	Dok3
ENSMUSG00000103174	5.28206	3.8629	1.52677	-2.53011	0.0114025	0.0594457	Gm37168
ENSMUSG00000026932	148.504	3.86194	0.953946	-4.04839	5.15722e-05	0.000652989	Nacc2
ENSMUSG00000026131	362.922	3.8613	0.578576	-6.6738	2.49271e-11	1.3502e-09	Dst
ENSMUSG00000066975	44.5633	3.85896	0.879742	-4.38647	1.15208e-05	0.000179425	Cryba4
ENSMUSG00000049625	3612.16	3.85384	0.572439	-6.73231	1.66987e-11	9.42856e-10	Tifab
ENSMUSG00000044197	301.835	3.85001	0.655497	-5.87343	4.2687e-09	1.45127e-07	Gpr146
ENSMUSG00000024730	239.425	3.84886	0.633286	-6.0776	1.21994e-09	4.60838e-08	Ms4a8a
ENSMUSG00000086368	12.3485	3.84847	1.25603	-3.064	0.00218399	0.0154964	Gm13830
ENSMUSG00000028859	2007.94	3.84534	0.851874	-4.51397	6.3624e-06	0.000106122	Csf3r
ENSMUSG00000027173	125.608	3.845	0.716491	-5.36644	8.03075e-08	2.11406e-06	Depdc7
ENSMUSG00000044701	286.907	3.84032	0.597884	-6.42318	1.33454e-10	6.18105e-09	Il27
ENSMUSG00000002103	5310.78	3.83953	0.553458	-6.93735	3.99526e-12	2.63803e-10	Acp2
ENSMUSG00000044811	5070.93	3.83931	0.666511	-5.76031	8.39584e-09	2.72677e-07	AF251705
ENSMUSG00000031596	28.8049	3.83653	1.10896	-3.45959	0.000541008	0.00478404	Slc7a2
ENSMUSG00000037902	5698.3	3.83535	0.693068	-5.53388	3.13231e-08	8.92177e-07	Sirpa
ENSMUSG00000018238	20.1742	3.83031	1.15629	-3.31257	0.00092443	0.00751345	Gdf9
ENSMUSG00000006219	452.677	3.82175	0.7605	-5.02531	5.02616e-07	1.09269e-05	Fblim1
ENSMUSG00000086156	181.336	3.81533	0.685211	-5.56811	2.57518e-08	7.49524e-07	Gm15354
ENSMUSG00000097083	34.7034	3.80846	0.901868	-4.22285	2.41228e-05	0.000339312	D930019O06Rik
ENSMUSG00000030187	3937.97	3.80628	0.673608	-5.65058	1.59907e-08	4.91376e-07	Klra2
ENSMUSG00000000555	1840.57	3.80165	0.898177	-4.23263	2.30972e-05	0.000326033	Itga5
ENSMUSG00000026986	153.516	3.79079	0.649549	-5.83603	5.34578e-09	1.79454e-07	Hnmt
ENSMUSG00000029468	525.938	3.7841	0.581603	-6.50632	7.70122e-11	3.80984e-09	P2rx7
ENSMUSG00000055541	4557.08	3.78072	0.5346	-7.07205	1.52663e-12	1.13461e-10	Lair1
ENSMUSG00000017390	293.1	3.78046	0.598191	-6.31983	2.61859e-10	1.16166e-08	Aldoc
ENSMUSG00000029759	669.174	3.77955	0.610624	-6.18965	6.02981e-10	2.43925e-08	Pon3
ENSMUSG00000070390	42.1644	3.77288	0.887093	-4.25308	2.10847e-05	0.000301352	Nlrp1b
ENSMUSG00000027165	68.9033	3.76774	0.866728	-4.34708	1.37959e-05	0.000209948	B230118H07Rik
ENSMUSG00000079470	11.5048	3.76695	1.25472	-3.00222	0.00268018	0.0184023	Utp14b
ENSMUSG00000031714	90.0547	3.76657	0.699189	-5.38705	7.16229e-08	1.8948e-06	Gab1
ENSMUSG00000108436	22.8827	3.76451	1.01414	-3.71201	0.000205618	0.0021102	RP23-137A24.6
ENSMUSG00000017737	50.2004	3.76369	1.11745	-3.36809	0.000756913	0.00633276	Mmp9
ENSMUSG00000001768	1580.69	3.75903	0.550931	-6.82306	8.91225e-12	5.39428e-10	Rin2
ENSMUSG00000081817	4.89478	3.75662	1.53469	-2.44781	0.0143729	0.0711916	Gm13590
ENSMUSG00000080241	7.90548	3.75433	1.36632	-2.74776	0.00600032	0.0355246	Dppa3-ps
ENSMUSG00000074158	5.27745	3.74908	1.54393	-2.42827	0.0151711	0.0740436	9830147E19Rik
ENSMUSG00000029561	6919.72	3.74815	0.584779	-6.40951	1.45986e-10	6.72251e-09	Oasl2
ENSMUSG00000026315	175.61	3.74664	0.850174	-4.40692	1.04853e-05	0.000165394	Serpinb8
ENSMUSG00000040883	297.622	3.74583	0.601237	-6.2302	4.65831e-10	1.93338e-08	Tmem205
ENSMUSG00000028864	180.306	3.74542	0.625187	-5.99089	2.08699e-09	7.54481e-08	Hgf
ENSMUSG00000031639	268.626	3.74017	0.630983	-5.92753	3.07529e-09	1.07527e-07	Tlr3
ENSMUSG00000032690	969.662	3.74001	0.712624	-5.24823	1.53572e-07	3.78108e-06	Oas2
ENSMUSG00000040613	7280.68	3.73929	0.607735	-6.15284	7.61078e-10	3.02324e-08	Apobec1
ENSMUSG00000090307	2633.42	3.7351	0.698651	-5.34615	8.9843e-08	2.33052e-06	1700071M16Rik
ENSMUSG00000084289	1769.11	3.73086	0.560702	-6.6539	2.85418e-11	1.52531e-09	Gm6977
ENSMUSG00000040165	4.76722	3.72705	1.53567	-2.42699	0.0152249	0.0742608	Cd209c
ENSMUSG00000037548	293.027	3.72645	0.661655	-5.63201	1.78117e-08	5.41089e-07	H2-DMb2
ENSMUSG00000014602	18.1394	3.72526	1.14225	-3.26135	0.00110884	0.00875838	Kif1a
ENSMUSG00000036743	16.9842	3.72109	1.17371	-3.17038	0.00152242	0.0113517	Psma8
ENSMUSG00000038665	7.75334	3.7193	1.37021	-2.7144	0.00663965	0.0384809	Dgki
ENSMUSG00000026271	1490.99	3.71874	0.674523	-5.51314	3.52487e-08	9.89876e-07	Gpr35
ENSMUSG00000022965	2823.59	3.71294	0.564304	-6.57968	4.71475e-11	2.43809e-09	Ifngr2
ENSMUSG00000007987	536.513	3.70837	0.561624	-6.60293	4.0311e-11	2.09814e-09	Ift22
ENSMUSG00000024866	8.03765	3.70665	1.38468	-2.6769	0.00743061	0.0422992	Acy3
ENSMUSG00000030579	8295.4	3.70293	0.534393	-6.92922	4.23166e-12	2.77122e-10	Tyrobp
ENSMUSG00000026768	83.6597	3.69996	0.778332	-4.7537	1.99723e-06	3.788e-05	Itga8
ENSMUSG00000040722	82.003	3.6997	0.937517	-3.94628	7.93743e-05	0.000943692	Scamp5
ENSMUSG00000055809	43.6416	3.69549	0.934996	-3.95241	7.73666e-05	0.000922567	Dnaaf3
ENSMUSG00000103367	106.766	3.69362	0.730517	-5.05618	4.27742e-07	9.47e-06	Gm38158
ENSMUSG00000032076	1231.57	3.69252	0.595735	-6.19827	5.70889e-10	2.32118e-08	Cadm1
ENSMUSG00000082301	138.475	3.69213	0.701728	-5.26148	1.42904e-07	3.53478e-06	Gm14032
ENSMUSG00000098654	20.5704	3.68351	1.04875	-3.51227	0.000444298	0.00406379	Gm27676
ENSMUSG00000105402	4.92398	3.68107	1.5439	-2.38427	0.0171131	0.0814084	Gm3716
ENSMUSG00000005580	20.5593	3.67314	1.01329	-3.62497	0.000288999	0.00281924	Adcy9
ENSMUSG00000039062	416.523	3.6725	0.954447	-3.84778	0.000119191	0.00134029	Anpep
ENSMUSG00000030786	604.342	3.67167	0.588877	-6.23504	4.51659e-10	1.89424e-08	Itgam
ENSMUSG00000026177	3284.33	3.67043	0.605655	-6.06027	1.35892e-09	5.09722e-08	Slc11a1
ENSMUSG00000035954	86.1833	3.67031	0.750373	-4.89132	1.00164e-06	2.04148e-05	Dock4
ENSMUSG00000023913	12980.7	3.66912	0.688447	-5.32956	9.84505e-08	2.513e-06	Pla2g7
ENSMUSG00000022947	111.31	3.66829	0.692232	-5.29923	1.16295e-07	2.92181e-06	Cbr3
ENSMUSG00000090231	352.816	3.6657	1.52173	-2.40891	0.0160005	0.0771955	Cfb
ENSMUSG00000004451	3083.06	3.66469	0.604381	-6.06355	1.3315e-09	5.00613e-08	Ralb
ENSMUSG00000014075	346.025	3.66275	0.595909	-6.14648	7.92213e-10	3.11027e-08	Tctex1d2
ENSMUSG00000086843	14.5379	3.65757	1.13809	-3.21377	0.00131003	0.0100543	E030013I19Rik
ENSMUSG00000035158	105.281	3.65644	0.676418	-5.40559	6.45967e-08	1.72319e-06	Mitf
ENSMUSG00000029560	369.375	3.65564	0.828689	-4.41135	1.02727e-05	0.000162522	Snx8
ENSMUSG00000000278	5576.72	3.65557	0.578117	-6.32324	2.5614e-10	1.14007e-08	Scpep1
ENSMUSG00000026630	176.597	3.65308	0.630408	-5.79479	6.8405e-09	2.24906e-07	Batf3
ENSMUSG00000031553	14.4887	3.65268	1.1365	-3.21396	0.00130916	0.0100524	Adam3
ENSMUSG00000101389	3413.89	3.64797	0.539811	-6.75787	1.40031e-11	8.13658e-10	Ms4a4a
ENSMUSG00000020357	7.70416	3.64782	1.39033	-2.6237	0.00869801	0.0478869	Flt4
ENSMUSG00000036053	76.8942	3.6462	0.763341	-4.77663	1.78257e-06	3.42765e-05	Fmnl2
ENSMUSG00000001865	59.3516	3.64354	0.943075	-3.86347	0.000111789	0.00127047	Cpa3
ENSMUSG00000097585	308.897	3.64087	0.652651	-5.57858	2.42488e-08	7.13574e-07	Gm26529
ENSMUSG00000021281	481.741	3.6373	0.569587	-6.38585	1.70449e-10	7.75955e-09	Tnfaip2
ENSMUSG00000068966	43.8433	3.63714	1.02949	-3.53295	0.000410943	0.00379344	Zbtb34
ENSMUSG00000045763	41.4283	3.637	0.885273	-4.10834	3.98515e-05	0.000521956	Basp1
ENSMUSG00000059326	5858.48	3.63308	0.726939	-4.99777	5.79958e-07	1.24652e-05	Csf2ra
ENSMUSG00000044786	15703.6	3.63159	0.878142	-4.13553	3.54129e-05	0.000474319	Zfp36
ENSMUSG00000068877	4.68885	3.63152	1.54723	-2.34712	0.0189193	0.088395	Selenbp2
ENSMUSG00000031216	160.074	3.6294	0.725095	-5.00541	5.57443e-07	1.2037e-05	Stard8
ENSMUSG00000028238	25.0981	3.62387	1.13728	-3.18644	0.00144034	0.0108664	Atp6v0d2
ENSMUSG00000074342	1107.14	3.62123	0.555956	-6.51351	7.34133e-11	3.65443e-09	I830077J02Rik
ENSMUSG00000097572	23.2811	3.61387	1.01952	-3.54469	0.00039308	0.00364752	Gm26797
ENSMUSG00000024621	16733.9	3.61215	0.775638	-4.657	3.2085e-06	5.79306e-05	Csf1r
ENSMUSG00000069662	1855.38	3.61051	0.559146	-6.45718	1.06672e-10	5.11866e-09	Marcks
ENSMUSG00000030084	114.459	3.60928	0.828866	-4.35449	1.33379e-05	0.000204485	Plxna1
ENSMUSG00000029330	23.2454	3.60876	0.981118	-3.67821	0.000234879	0.00236494	Cds1
ENSMUSG00000025330	90.6356	3.60688	0.953776	-3.78169	0.00015577	0.00167725	Padi4
ENSMUSG00000106691	7.18933	3.60159	1.38475	-2.6009	0.00929801	0.0506038	2700029L08Rik
ENSMUSG00000022303	13.4904	3.6007	1.20407	-2.99044	0.00278574	0.018966	Dcstamp
ENSMUSG00000042638	4.43373	3.59847	1.54557	-2.32825	0.0198988	0.0917802	Gucy2c
ENSMUSG00000041809	4.40915	3.59816	1.54456	-2.32958	0.0198284	0.0915983	Efhc1
ENSMUSG00000069792	2932.8	3.598	0.6984	-5.15178	2.58029e-07	5.98409e-06	Wfdc17
ENSMUSG00000037306	145.307	3.59492	0.774208	-4.64335	3.428e-06	6.09978e-05	Man1c1
ENSMUSG00000022408	52.6848	3.59382	1.02973	-3.49006	0.000482912	0.00435795	Fam83f
ENSMUSG00000092609	142.802	3.59069	0.762756	-4.70753	2.50738e-06	4.65877e-05	Gm20481
ENSMUSG00000000552	248.861	3.58848	0.842385	-4.2599	2.04516e-05	0.000293354	Zfp385a
ENSMUSG00000075269	45.7564	3.58837	0.978955	-3.66551	0.000246846	0.00246676	Bex6
ENSMUSG00000030560	85863.5	3.58591	0.628027	-5.70981	1.13103e-08	3.57877e-07	Ctsc
ENSMUSG00000039166	28.996	3.58207	0.915165	-3.91412	9.07328e-05	0.00105421	Akap7
ENSMUSG00000037820	3389.5	3.57805	0.853667	-4.19139	2.77252e-05	0.000380602	Tgm2
ENSMUSG00000105701	4.48752	3.57191	1.54893	-2.30606	0.0211074	0.0961447	Gm42587
ENSMUSG00000063611	25.7638	3.57142	1.07669	-3.31704	0.000909772	0.0074094	Gm10134
ENSMUSG00000044313	7.64576	3.56918	1.41728	-2.51833	0.0117913	0.0609557	Mab21l3
ENSMUSG00000096950	19.366	3.56288	1.14869	-3.10168	0.00192425	0.0138941	Gm9530
ENSMUSG00000016024	17.3295	3.55958	1.21052	-2.94054	0.00327642	0.0217779	Lbp
ENSMUSG00000090439	4.38456	3.55747	1.54871	-2.29706	0.0216153	0.0978404	Gm17455
ENSMUSG00000074361	40.5303	3.55742	0.896469	-3.96826	7.23994e-05	0.000868817	C5ar2
ENSMUSG00000040855	4.45832	3.55524	1.55187	-2.29094	0.0219669	0.099094	Reps2
ENSMUSG00000032246	13.6696	3.55343	1.15229	-3.0838	0.00204377	0.0146184	Calml4
ENSMUSG00000031264	607.419	3.55146	0.705531	-5.03375	4.80984e-07	1.04852e-05	Btk
ENSMUSG00000027488	16.1185	3.54437	1.16341	-3.04653	0.00231497	0.0162812	Snta1
ENSMUSG00000024430	21.8107	3.54345	1.04276	-3.39813	0.000678476	0.00577283	Cabyr
ENSMUSG00000037731	9275.79	3.54291	0.835435	-4.2408	2.22721e-05	0.000315502	Themis2
ENSMUSG00000106492	4.33077	3.54263	1.55054	-2.28477	0.0223263	0.100145	Gm29707
ENSMUSG00000106087	7.48253	3.53903	1.37322	-2.57717	0.00996127	0.053288	Gm43609
ENSMUSG00000029175	1224.88	3.53884	0.627013	-5.64396	1.66179e-08	5.0772e-07	Slc35f6
ENSMUSG00000103735	84.1579	3.53856	0.721308	-4.90575	9.30729e-07	1.91404e-05	Gm38317
ENSMUSG00000024736	125.652	3.53552	0.736556	-4.80007	1.5861e-06	3.07577e-05	Tmem132a
ENSMUSG00000034226	70.4632	3.5347	0.792018	-4.46291	8.08542e-06	0.000131298	Rhov
ENSMUSG00000035299	45.1149	3.53453	0.884048	-3.99812	6.38476e-05	0.00078118	Mid1
ENSMUSG00000038371	43.4968	3.53413	0.820594	-4.3068	1.65632e-05	0.000246427	Sbf2
ENSMUSG00000037966	1363.65	3.53	0.575343	-6.13547	8.49054e-10	3.29297e-08	Ninj1
ENSMUSG00000097860	568.54	3.52931	0.563182	-6.26672	3.68732e-10	1.57119e-08	Gm26857
ENSMUSG00000044813	27.9218	3.52603	0.917403	-3.84349	0.000121297	0.00135824	Shb
ENSMUSG00000021483	303.098	3.51448	0.636807	-5.51891	3.41106e-08	9.6299e-07	Cdk20
ENSMUSG00000038894	87.5851	3.51439	0.950465	-3.69755	0.000217691	0.00221292	Irs2
ENSMUSG00000074212	359.71	3.5138	0.591243	-5.94306	2.79751e-09	9.88968e-08	Dnajb14
ENSMUSG00000075553	4.20321	3.51244	1.55122	-2.2643	0.0235554	0.104386	Gm5464
ENSMUSG00000030064	1539.55	3.51026	0.545051	-6.44025	1.19279e-10	5.62231e-09	Frmd4b
ENSMUSG00000019122	2244.9	3.50961	0.644414	-5.4462	5.14572e-08	1.40313e-06	Ccl9
ENSMUSG00000044338	35.0126	3.50789	1.09278	-3.21007	0.00132704	0.0101432	Aplnr
ENSMUSG00000090675	4.17862	3.50473	1.55112	-2.25948	0.0238536	0.105437	Olfr111
ENSMUSG00000051397	13.2399	3.49894	1.24782	-2.80404	0.00504663	0.0311112	Tacstd2
ENSMUSG00000068245	1134.49	3.49265	0.633156	-5.51625	3.46307e-08	9.74234e-07	Phf11d
ENSMUSG00000019055	1204.97	3.4915	0.788143	-4.43004	9.42169e-06	0.000150099	Plod1
ENSMUSG00000092283	736.387	3.48827	0.821787	-4.24474	2.18846e-05	0.000311115	Gm20412
ENSMUSG00000086656	112.144	3.48563	0.871769	-3.99834	6.37878e-05	0.000781168	Gm15701
ENSMUSG00000049928	12.6602	3.48112	1.18024	-2.9495	0.00318288	0.0212533	Glp2r
ENSMUSG00000036469	2914.14	3.48011	0.577927	-6.02172	1.72572e-09	6.33916e-08	March1
ENSMUSG00000026939	90.7036	3.47971	0.718052	-4.84605	1.25945e-06	2.49377e-05	Tmem141
ENSMUSG00000090812	6.67449	3.4796	1.4032	-2.47976	0.0131471	0.0663542	Samd15
ENSMUSG00000039246	4.71343	3.47487	1.5632	-2.22292	0.0262213	0.113149	Lyplal1
ENSMUSG00000035041	48.4017	3.47352	0.798661	-4.34918	1.36645e-05	0.000208695	Creb3l3
ENSMUSG00000038055	90.5199	3.47329	0.764111	-4.54553	5.47984e-06	9.30525e-05	Dexi
ENSMUSG00000035713	45.4021	3.47023	0.826236	-4.20005	2.66856e-05	0.000369185	Usp35
ENSMUSG00000062638	7.32577	3.46968	1.39094	-2.49449	0.0126138	0.0642514	Btnl1
ENSMUSG00000086486	4.07565	3.46688	1.55364	-2.23145	0.0256513	0.111321	Ift88os
ENSMUSG00000104000	4.07565	3.46688	1.55364	-2.23145	0.0256513	0.111321	Gm38335
ENSMUSG00000024679	16369.8	3.46482	0.706145	-4.90667	9.26347e-07	1.90995e-05	Ms4a6d
ENSMUSG00000085998	6.54693	3.45861	1.40334	-2.46455	0.0137186	0.0686964	AW822252
ENSMUSG00000107136	26.2519	3.45744	0.977702	-3.53629	0.000405788	0.00374803	Gm42466
ENSMUSG00000079465	4.10024	3.45664	1.55585	-2.2217	0.0263034	0.113472	Col4a3
ENSMUSG00000063954	4.15403	3.4537	1.55617	-2.21935	0.0264628	0.114006	Hist2h2aa2
ENSMUSG00000089898	7.31227	3.45335	1.43848	-2.4007	0.0163639	0.0786403	Gm14199
ENSMUSG00000038188	452.65	3.45182	1.54384	-2.23586	0.0253606	0.11057	Scarf1
ENSMUSG00000037406	7.04607	3.44637	1.38441	-2.48942	0.0127952	0.0649916	Htra4
ENSMUSG00000034055	29.6275	3.44598	1.06981	-3.22112	0.00127693	0.00984275	Phka1
ENSMUSG00000049676	12.2683	3.43853	1.19125	-2.88649	0.0038956	0.0250898	Catsperg1
ENSMUSG00000032066	144.293	3.43694	0.632049	-5.43777	5.39502e-08	1.45866e-06	Bco2
ENSMUSG00000050103	44.7981	3.43486	0.844526	-4.0672	4.75811e-05	0.000607752	Agmo
ENSMUSG00000098851	4.05107	3.43381	1.55649	-2.20613	0.0273752	0.117097	Mir6353
ENSMUSG00000078485	140.998	3.4338	0.769708	-4.46117	8.15119e-06	0.000132097	Plekhn1
ENSMUSG00000087338	523.436	3.43184	0.6103	-5.62319	1.87458e-08	5.64014e-07	Scpep1os
ENSMUSG00000022586	2696.54	3.42849	0.721542	-4.75162	2.01796e-06	3.81598e-05	Ly6i
ENSMUSG00000030703	37.3436	3.4263	0.843255	-4.06318	4.8408e-05	0.000617327	Gdpd3
ENSMUSG00000107760	9.22415	3.42541	1.30025	-2.63442	0.00842819	0.0466323	Gm44401
ENSMUSG00000038775	873.786	3.42248	0.547971	-6.24573	4.21828e-10	1.77847e-08	Vill
ENSMUSG00000047963	15.5591	3.4221	1.21474	-2.81716	0.00484505	0.030089	Stbd1
ENSMUSG00000109245	69.5391	3.42148	0.909658	-3.76128	0.000169046	0.0018044	RP24-88J19.3
ENSMUSG00000086600	206.408	3.42128	0.613639	-5.5754	2.46957e-08	7.2406e-07	C030005K06Rik
ENSMUSG00000034579	3.97269	3.42074	1.55702	-2.19698	0.0280218	0.118864	Pla2g3
ENSMUSG00000039037	3.97269	3.42074	1.55702	-2.19698	0.0280218	0.118864	St6galnac5
ENSMUSG00000079419	11435.7	3.41988	0.654279	-5.22694	1.72334e-07	4.21058e-06	Ms4a6c
ENSMUSG00000072244	21.4101	3.41418	1.02093	-3.34417	0.000825293	0.00681537	Trim6
ENSMUSG00000032860	38.0126	3.41224	1.06518	-3.20344	0.00135798	0.0103329	P2ry2
ENSMUSG00000026342	527.505	3.41115	0.562131	-6.06824	1.29316e-09	4.87345e-08	Slc35f5
ENSMUSG00000107390	61.3512	3.40624	0.748826	-4.54877	5.39599e-06	9.20017e-05	Gm43323
ENSMUSG00000023961	905.441	3.40391	0.547546	-6.21666	5.07847e-10	2.09687e-08	Enpp4
ENSMUSG00000004952	785.972	3.40379	0.810539	-4.19942	2.67598e-05	0.000369892	Rasa4
ENSMUSG00000021684	51.7504	3.40298	0.791535	-4.29922	1.71401e-05	0.000253673	Pde8b
ENSMUSG00000042684	86.1084	3.39914	0.826773	-4.11134	3.93375e-05	0.000516495	Npl
ENSMUSG00000026317	1124.97	3.38761	0.736887	-4.59719	4.28222e-06	7.44566e-05	Cln8
ENSMUSG00000009621	147.995	3.38727	0.994602	-3.40565	0.000660072	0.00563725	Vav2
ENSMUSG00000049404	12.1365	3.38718	1.25333	-2.70254	0.00688128	0.0396661	Rarres1
ENSMUSG00000039109	2207.55	3.38675	0.550462	-6.15255	7.62481e-10	3.02324e-08	F13a1
ENSMUSG00000021758	29.4442	3.38178	0.92561	-3.65357	0.00025862	0.00257064	Ddx4
ENSMUSG00000003283	5828.39	3.38122	0.531518	-6.36143	1.99889e-10	9.02267e-09	Hck
ENSMUSG00000104484	9.03172	3.37866	1.26162	-2.67802	0.0074058	0.042203	Gm33142
ENSMUSG00000046688	1932.03	3.37775	0.6014	-5.61647	1.94894e-08	5.82095e-07	Tifa
ENSMUSG00000035773	6.18885	3.37327	1.41256	-2.38806	0.0169377	0.0808147	Kiss1r
ENSMUSG00000040987	3.84513	3.36834	1.55992	-2.1593	0.0308269	0.127678	Mill2
ENSMUSG00000072553	3.84513	3.36834	1.55992	-2.1593	0.0308269	0.127678	Gm525
ENSMUSG00000035561	288.373	3.36774	0.923951	-3.64494	0.000267459	0.00264955	Aldh1b1
ENSMUSG00000026880	919.531	3.36667	0.723692	-4.65208	3.28606e-06	5.90258e-05	Stom
ENSMUSG00000024247	11.7246	3.36511	1.24316	-2.70691	0.00679135	0.0392049	Pkdcc
ENSMUSG00000019832	3425.47	3.36242	0.626532	-5.36672	8.01795e-08	2.11406e-06	Rab32
ENSMUSG00000030272	1371.36	3.36238	0.576408	-5.83334	5.43298e-09	1.81618e-07	Camk1
ENSMUSG00000070348	1380.96	3.36178	0.685671	-4.90291	9.44268e-07	1.9369e-05	Ccnd1
ENSMUSG00000108120	50.5395	3.35857	0.834061	-4.02677	5.65482e-05	0.000705924	9930120I10Rik
ENSMUSG00000026872	3502.47	3.35513	0.546727	-6.13677	8.42184e-10	3.28226e-08	Zeb2
ENSMUSG00000003420	3350.37	3.35186	0.593422	-5.64836	1.61988e-08	4.95864e-07	Fcgrt
ENSMUSG00000054855	48.1528	3.35108	1.06722	-3.14001	0.00168941	0.0124344	Rnd1
ENSMUSG00000022793	132.483	3.34938	0.71119	-4.70954	2.48272e-06	4.61833e-05	B4galt4
ENSMUSG00000041115	87.1501	3.34741	0.908852	-3.68312	0.000230397	0.00232713	Iqsec2
ENSMUSG00000095788	2339.85	3.3471	0.655301	-5.10773	3.26045e-07	7.41091e-06	Sirpb1a
ENSMUSG00000041827	1168.18	3.34622	0.935203	-3.57807	0.000346143	0.00328056	Oasl1
ENSMUSG00000007837	205.839	3.34603	0.676074	-4.94921	7.45153e-07	1.56668e-05	Prrg2
ENSMUSG00000108574	19.472	3.34214	1.12683	-2.96596	0.00301738	0.020301	RP23-292C5.9
ENSMUSG00000049281	3.92351	3.34008	1.56388	-2.13577	0.0326984	0.133254	Scn3b
ENSMUSG00000049037	8856.67	3.32515	0.645573	-5.15069	2.59531e-07	6.01021e-06	Clec4a1
ENSMUSG00000006281	3068.55	3.32173	0.556604	-5.96785	2.40399e-09	8.61287e-08	Tep1
ENSMUSG00000055546	11.1449	3.32009	1.18569	-2.80014	0.00510811	0.0314053	Timd4
ENSMUSG00000087480	11.2233	3.31566	1.19248	-2.78048	0.00542779	0.0329524	Gm15910
ENSMUSG00000030088	22.4381	3.31149	1.14242	-2.89867	0.00374754	0.0242342	Aldh1l1
ENSMUSG00000045502	62.8062	3.31104	0.942358	-3.51357	0.000442124	0.00405242	Hcar2
ENSMUSG00000021939	107111	3.2981	0.529179	-6.23248	4.59111e-10	1.91045e-08	Ctsb
ENSMUSG00000109326	18.4939	3.29772	1.02168	-3.22775	0.00124767	0.00966384	RP24-420E8.1
ENSMUSG00000014547	145.513	3.29752	0.685393	-4.81114	1.50074e-06	2.93159e-05	Wdfy2
ENSMUSG00000097832	11.0174	3.29738	1.19051	-2.76972	0.00561044	0.0337534	Gm26912
ENSMUSG00000032826	3.76675	3.2969	1.56649	-2.10464	0.0353227	0.14107	Ank2
ENSMUSG00000103427	3.76675	3.2969	1.56649	-2.10464	0.0353227	0.14107	Gm37534
ENSMUSG00000108235	3.76675	3.2969	1.56649	-2.10464	0.0353227	0.14107	Gm44248
ENSMUSG00000058715	32887.5	3.29594	0.66085	-4.98742	6.11918e-07	1.30895e-05	Fcer1g
ENSMUSG00000022419	279.022	3.29583	0.632857	-5.20786	1.9103e-07	4.61796e-06	Deptor
ENSMUSG00000022438	52.584	3.29527	0.825265	-3.99298	6.52478e-05	0.000795874	Parvb
ENSMUSG00000000058	171.36	3.29321	0.620188	-5.31001	1.09617e-07	2.77146e-06	Cav2
ENSMUSG00000000686	701.862	3.29303	0.769106	-4.28163	1.85525e-05	0.000270485	Abhd15
ENSMUSG00000026879	6463.33	3.2896	0.698872	-4.70702	2.5137e-06	4.66508e-05	Gsn
ENSMUSG00000039193	205.038	3.28594	0.61664	-5.32879	9.88696e-08	2.51968e-06	Nlrc4
ENSMUSG00000084821	23.1186	3.28343	1.01329	-3.24035	0.00119383	0.00933387	Gm15880
ENSMUSG00000060703	1679.88	3.28177	0.597648	-5.49115	3.99334e-08	1.10973e-06	Cd302
ENSMUSG00000042129	6088.14	3.28137	0.539069	-6.0871	1.14977e-09	4.36395e-08	Rassf4
ENSMUSG00000052384	12910.9	3.2804	0.72943	-4.49721	6.88507e-06	0.000113771	Nrros
ENSMUSG00000009092	11.0284	3.27847	1.25583	-2.61059	0.00903853	0.0494273	Derl3
ENSMUSG00000030946	116.057	3.27781	0.667058	-4.91383	8.93151e-07	1.85346e-05	Lhpp
ENSMUSG00000039982	103.886	3.27601	0.667019	-4.91142	9.0421e-07	1.87155e-05	Dtx4
ENSMUSG00000036046	344.627	3.27324	0.824068	-3.97205	7.12579e-05	0.000858696	5031439G07Rik
ENSMUSG00000021876	872.596	3.26644	0.609698	-5.35748	8.43918e-08	2.20332e-06	Rnase4
ENSMUSG00000073418	458.91	3.26594	0.946991	-3.44875	0.000563186	0.0049473	C4b
ENSMUSG00000040963	3.61461	3.26255	1.56625	-2.08303	0.0372489	0.146668	Asgr2
ENSMUSG00000053063	3179.08	3.25295	0.645179	-5.04194	4.60827e-07	1.00871e-05	Clec12a
ENSMUSG00000066026	1605.34	3.24447	0.601947	-5.38997	7.04705e-08	1.86741e-06	Dhrs3
ENSMUSG00000017009	2936.27	3.2386	0.567646	-5.70532	1.16128e-08	3.66721e-07	Sdc4
ENSMUSG00000018796	659.983	3.2386	0.723638	-4.47544	7.62549e-06	0.000125229	Acsl1
ENSMUSG00000022501	10.6704	3.23278	1.25896	-2.56781	0.0102343	0.0544748	Prm1
ENSMUSG00000020023	188.853	3.22763	0.62319	-5.17921	2.22824e-07	5.31419e-06	Tmcc3
ENSMUSG00000022479	50.3144	3.22202	0.867884	-3.7125	0.000205222	0.00210865	Vdr
ENSMUSG00000071547	42.9512	3.2067	0.947517	-3.38431	0.000713565	0.00602964	Nt5dc2
ENSMUSG00000098243	3.59002	3.20467	1.5709	-2.04002	0.0413483	0.15867	Gm4258
ENSMUSG00000084964	29.1852	3.20345	0.887918	-3.60783	0.000308774	0.00298121	Gm15503
ENSMUSG00000072673	351.735	3.20117	0.830673	-3.8537	0.000116345	0.00131199	Gm10392
ENSMUSG00000107586	19.9083	3.19786	1.08625	-2.94394	0.00324059	0.0215936	Gm44283
ENSMUSG00000046080	11.3573	3.19776	1.32269	-2.41763	0.0156219	0.0758962	Clec9a
ENSMUSG00000010663	425.131	3.19689	0.803268	-3.97985	6.89581e-05	0.000835392	Fads1
ENSMUSG00000088932	5.52187	3.19372	1.43554	-2.22474	0.0260985	0.112771	Gm25920
ENSMUSG00000049191	33.5525	3.18591	0.984494	-3.23609	0.00121177	0.00943613	Rgag4
ENSMUSG00000075702	834.914	3.18546	0.713617	-4.46383	8.0508e-06	0.000130868	Selm
ENSMUSG00000091996	116.074	3.18493	0.738557	-4.31236	1.61518e-05	0.00024098	BC049352
ENSMUSG00000103001	5.49728	3.18266	1.43641	-2.21571	0.0267113	0.114828	A930005N03Rik
ENSMUSG00000073413	3.48705	3.18208	1.57124	-2.0252	0.0428467	0.162624	Ly6g6d
ENSMUSG00000086765	3.48705	3.18208	1.57124	-2.0252	0.0428467	0.162624	Gm11827
ENSMUSG00000027333	967.112	3.18123	0.651408	-4.88363	1.0415e-06	2.10659e-05	Smox
ENSMUSG00000038859	12.4636	3.18092	1.14611	-2.77541	0.00551318	0.0333441	Baiap2l1
ENSMUSG00000027624	91.8371	3.18055	0.743165	-4.27974	1.87114e-05	0.000272552	Epb41l1
ENSMUSG00000087515	27.4929	3.18004	1.09691	-2.89908	0.00374262	0.0242217	Gm13554
ENSMUSG00000027399	13.8737	3.17925	1.15763	-2.74633	0.00602657	0.0356265	Il1a
ENSMUSG00000025534	5935.38	3.17607	0.539853	-5.88321	4.02396e-09	1.37391e-07	Gusb
ENSMUSG00000063145	27.0809	3.17539	0.912806	-3.47872	0.000503823	0.00451772	Bbs5
ENSMUSG00000103364	8.99143	3.17337	1.31372	-2.41556	0.0157109	0.0762128	Gm38157
ENSMUSG00000038543	1194.01	3.17303	0.621484	-5.10557	3.29797e-07	7.48555e-06	BC028528
ENSMUSG00000018774	17212.9	3.17294	0.670668	-4.73102	2.2339e-06	4.19947e-05	Cd68
ENSMUSG00000034842	132.428	3.17198	0.673964	-4.70646	2.5206e-06	4.67246e-05	Art3
ENSMUSG00000033276	3.79134	3.1683	1.57779	-2.00806	0.0446366	0.167469	Stk36
ENSMUSG00000032489	131.692	3.16694	0.638311	-4.96144	6.99729e-07	1.48289e-05	Kif9
ENSMUSG00000000562	82.1621	3.16624	0.694447	-4.55938	5.13059e-06	8.78689e-05	Adora3
ENSMUSG00000046908	520.467	3.16498	0.592708	-5.33987	9.30149e-08	2.40499e-06	Ltb4r1
ENSMUSG00000109556	5.91804	3.16479	1.41933	-2.22977	0.0257625	0.111651	RP23-81F19.2
ENSMUSG00000074570	128.273	3.16424	0.658043	-4.80856	1.52019e-06	2.96595e-05	Cass4
ENSMUSG00000101029	21.563	3.1642	1.00303	-3.15464	0.00160694	0.0118931	Gm29439
ENSMUSG00000042333	85.1346	3.16353	0.84443	-3.74635	0.000179424	0.00188993	Tnfrsf14
ENSMUSG00000077714	14.8162	3.16346	1.082	-2.92372	0.00345872	0.0227623	Snord17
ENSMUSG00000087252	3.40867	3.16221	1.57221	-2.01131	0.0442923	0.166432	Gm14379
ENSMUSG00000087256	3.40867	3.16221	1.57221	-2.01131	0.0442923	0.166432	Gm15990
ENSMUSG00000081660	5.4189	3.15871	1.44137	-2.19146	0.0284185	0.120132	Gm11787
ENSMUSG00000014543	390.223	3.15775	0.626354	-5.04148	4.61953e-07	1.00979e-05	Klra17
ENSMUSG00000097715	503.511	3.15665	0.560932	-5.6275	1.82837e-08	5.52278e-07	Gpr137b-ps
ENSMUSG00000030981	5.57566	3.15627	1.44685	-2.18148	0.0291478	0.122438	Mmp21
ENSMUSG00000051506	228.22	3.15052	0.645983	-4.8771	1.07659e-06	2.16228e-05	Wdfy4
ENSMUSG00000079800	3.38408	3.14838	1.57254	-2.00209	0.0452746	0.169264	AC125149.3
ENSMUSG00000080152	3.38408	3.14838	1.57254	-2.00209	0.0452746	0.169264	Gm12260
ENSMUSG00000022305	50.7985	3.14777	0.765357	-4.11281	3.90864e-05	0.0005147	Lrp12
ENSMUSG00000050270	46.3591	3.14369	0.833656	-3.77097	0.000162615	0.00174041	Tmem220
ENSMUSG00000021338	188.821	3.14257	0.68642	-4.5782	4.68983e-06	8.1015e-05	Lrrc16a
ENSMUSG00000028494	10998.4	3.14074	0.622029	-5.04918	4.43713e-07	9.76597e-06	Plin2
ENSMUSG00000089672	3591.91	3.1393	0.607135	-5.17067	2.33251e-07	5.51349e-06	Lilr4b
ENSMUSG00000021846	12.4009	3.13882	1.22126	-2.57014	0.0101658	0.0542006	Peli2
ENSMUSG00000068417	97.9238	3.13166	0.6755	-4.63607	3.55097e-06	6.29611e-05	Pnp2
ENSMUSG00000082229	9.97879	3.12966	1.27286	-2.45877	0.0139414	0.0695637	Nap1l2
ENSMUSG00000099775	20.4239	3.12755	1.08299	-2.88787	0.00387855	0.0250001	Gm5960
ENSMUSG00000098557	453.688	3.12613	0.569378	-5.49043	4.00951e-08	1.11061e-06	Kctd12
ENSMUSG00000040522	699.14	3.11794	0.666257	-4.67979	2.8717e-06	5.23823e-05	Tlr8
ENSMUSG00000037995	22.3306	3.11689	1.16814	-2.66826	0.00762458	0.0431573	Igsf9
ENSMUSG00000089827	51.9348	3.1168	0.877442	-3.55215	0.0003821	0.00356842	1700023H06Rik
ENSMUSG00000019876	406.055	3.11387	0.597193	-5.21417	1.84641e-07	4.48638e-06	Pkib
ENSMUSG00000019853	3.43326	3.11158	1.57723	-1.97281	0.0485171	0.178208	Hebp2
ENSMUSG00000085486	3.43326	3.11158	1.57723	-1.97281	0.0485171	0.178208	Gm11634
ENSMUSG00000104340	8.96223	3.1101	1.34309	-2.31563	0.0205785	0.0941647	Gm10522
ENSMUSG00000041845	46.4669	3.10396	0.786243	-3.94784	7.88583e-05	0.000938955	Rhod
ENSMUSG00000078780	912.87	3.10381	0.643582	-4.82271	1.41621e-06	2.78348e-05	Gm5150
ENSMUSG00000085213	7.50752	3.1022	1.34535	-2.30586	0.0211186	0.0961682	Gm13091
ENSMUSG00000028497	945.657	3.08854	0.597056	-5.17295	2.30431e-07	5.46299e-06	Hacd4
ENSMUSG00000106451	7.48293	3.08548	1.3502	-2.2852	0.0223011	0.100132	Gm42934
ENSMUSG00000056515	3193.84	3.08399	0.535033	-5.76412	8.20856e-09	2.67138e-07	Rab31
ENSMUSG00000053687	4451.57	3.08285	0.63422	-4.86085	1.16886e-06	2.32882e-05	Dpep2
ENSMUSG00000097111	21.055	3.0813	1.13024	-2.72622	0.00640635	0.0373313	Peak1os
ENSMUSG00000031591	11628.4	3.08079	0.581989	-5.29356	1.19959e-07	2.99972e-06	Asah1
ENSMUSG00000039110	5.66293	3.07977	1.4309	-2.15233	0.0313712	0.129229	Mycbpap
ENSMUSG00000039760	3.56082	3.07972	1.58129	-1.9476	0.0514625	0.185824	Il22ra2
ENSMUSG00000030577	155.459	3.07902	0.635595	-4.84431	1.27054e-06	2.50641e-05	Cd22
ENSMUSG00000032786	3783.96	3.07804	0.536587	-5.73633	9.67505e-09	3.11062e-07	Alas1
ENSMUSG00000078851	117.46	3.0766	0.659634	-4.6641	3.09976e-06	5.62214e-05	Hist3h2a
ENSMUSG00000048612	827.053	3.07215	0.562141	-5.4651	4.62657e-08	1.27462e-06	Myof
ENSMUSG00000106967	121.11	3.07023	0.699319	-4.39032	1.13186e-05	0.000176845	Gm42477
ENSMUSG00000015850	102.236	3.06773	0.797429	-3.84703	0.000119558	0.00134347	Adamtsl4
ENSMUSG00000027611	120.897	3.06751	0.659209	-4.65333	3.26624e-06	5.87739e-05	Procr
ENSMUSG00000062960	205.523	3.06734	1.53711	-1.99553	0.0459853	0.171202	Kdr
ENSMUSG00000079057	1460.99	3.06646	0.564778	-5.42949	5.65164e-08	1.52289e-06	Cyp4v3
ENSMUSG00000021575	36.9462	3.0637	1.08336	-2.82797	0.00468443	0.0292393	Ahrr
ENSMUSG00000033720	98.1756	3.06263	0.709143	-4.31878	1.56895e-05	0.000235844	Sfxn5
ENSMUSG00000090230	9.82204	3.06218	1.30506	-2.34638	0.0189565	0.0885174	Gm16315
ENSMUSG00000031442	5.08541	3.05262	1.45577	-2.09691	0.0360017	0.142889	Mcf2l
ENSMUSG00000022180	810.087	3.0474	1.57236	-1.93811	0.0526102	0.188827	Slc7a8
ENSMUSG00000057315	262.526	3.04557	0.597712	-5.09538	3.4805e-07	7.8606e-06	Arhgap24
ENSMUSG00000086150	36.8325	3.04408	1.09544	-2.77886	0.00545506	0.0330708	Bach2os
ENSMUSG00000021125	466.323	3.04109	0.676115	-4.4979	6.86292e-06	0.000113522	Arg2
ENSMUSG00000043832	6898.35	3.04103	0.660924	-4.60117	4.20115e-06	7.32064e-05	Clec4a3
ENSMUSG00000089994	5.65404	3.03891	1.48126	-2.05157	0.0402114	0.15539	Gm16239
ENSMUSG00000044952	125.889	3.03449	0.843695	-3.59667	0.000322319	0.00309144	Kctd21
ENSMUSG00000032024	80.2296	3.03317	0.697039	-4.35151	1.35204e-05	0.000206937	Clmp
ENSMUSG00000021624	605.619	3.03252	0.556729	-5.44703	5.12185e-08	1.39901e-06	Cd180
ENSMUSG00000021306	575.019	3.03085	0.595594	-5.08878	3.60366e-07	8.08748e-06	Gpr137b
ENSMUSG00000026958	664.215	3.03057	0.571861	-5.29948	1.1613e-07	2.92181e-06	Dpp7
ENSMUSG00000015474	914.146	3.02824	0.775343	-3.90568	9.39603e-05	0.00108718	Ppt2
ENSMUSG00000031791	72.7172	3.02273	0.740436	-4.08236	4.45799e-05	0.000574933	Tmem38a
ENSMUSG00000038086	5.53538	3.02149	1.44103	-2.09675	0.0360158	0.14291	Hspb2
ENSMUSG00000107715	13.6412	3.01993	1.20171	-2.51304	0.0119697	0.0617259	Gm44135
ENSMUSG00000051065	13.6658	3.01977	1.20469	-2.50668	0.0121873	0.062491	Mb21d2
ENSMUSG00000045551	1832.53	3.01897	0.675668	-4.46812	7.89096e-06	0.000128532	Fpr1
ENSMUSG00000013418	13.2674	3.01867	1.12709	-2.6783	0.00739977	0.0421864	B4galnt2
ENSMUSG00000050866	3.56543	3.01823	1.58374	-1.90577	0.0566807	0.198924	Clrn3
ENSMUSG00000031875	2148.93	3.01667	0.544794	-5.53726	3.07241e-08	8.7935e-07	Cmtm3
ENSMUSG00000004359	381.278	3.01366	0.714259	-4.21929	2.45077e-05	0.00034412	Spic
ENSMUSG00000046031	4471.77	3.01354	0.644481	-4.67592	2.9264e-06	5.33193e-05	Fam26f
ENSMUSG00000006611	3703.56	3.01258	0.600473	-5.01701	5.24829e-07	1.13944e-05	Hfe
ENSMUSG00000097501	69.5917	3.0114	0.734716	-4.09872	4.15434e-05	0.000539692	Gm26536
ENSMUSG00000073758	58.4396	3.01039	0.745479	-4.0382	5.38636e-05	0.000676641	Sh3d21
ENSMUSG00000072594	185.823	3.00945	0.66937	-4.49594	6.92637e-06	0.000114335	Gm16439
ENSMUSG00000079671	5.43241	3.00683	1.44055	-2.08728	0.0368631	0.145441	2610203C22Rik
ENSMUSG00000009292	285.169	3.00189	1.07544	-2.79132	0.00524931	0.0321251	Trpm2
ENSMUSG00000031266	1122.08	3.0003	0.654868	-4.58153	4.61597e-06	7.98253e-05	Gla
ENSMUSG00000026809	49.0651	2.99877	1.04263	-2.87617	0.00402537	0.0257698	1700026L06Rik
ENSMUSG00000085802	29.6382	2.99834	0.998733	-3.00215	0.00268084	0.0184023	Gm16059
ENSMUSG00000085977	47.0249	2.99573	0.77633	-3.85883	0.000113932	0.00128932	Gm5970
ENSMUSG00000038178	1454.92	2.99518	0.737246	-4.06266	4.85172e-05	0.000618227	Slc43a2
ENSMUSG00000026956	1990.13	2.99299	0.697687	-4.28987	1.78778e-05	0.00026329	Uap1l1
ENSMUSG00000034959	276.637	2.99142	0.583437	-5.12723	2.94029e-07	6.73106e-06	5031414D18Rik
ENSMUSG00000034101	47.9585	2.98989	0.785128	-3.80816	0.000140007	0.00152708	Ctnnd1
ENSMUSG00000089844	36.1006	2.98986	0.862562	-3.46626	0.000527761	0.00469442	A530032D15Rik
ENSMUSG00000035186	15.8103	2.98872	1.07856	-2.77102	0.00558811	0.0336468	Ubd
ENSMUSG00000075420	14.6081	2.98844	1.12867	-2.64776	0.00810274	0.0452952	Smim6
ENSMUSG00000018752	5.11462	2.98731	1.4718	-2.02969	0.0423876	0.161457	Tnfsfm13
ENSMUSG00000030474	805.136	2.98667	0.696907	-4.2856	1.82243e-05	0.000267407	Siglece
ENSMUSG00000034652	3866.39	2.98628	0.546118	-5.4682	4.5463e-08	1.25467e-06	Cd300a
ENSMUSG00000086119	4.85489	2.98387	1.4632	-2.03927	0.0414227	0.15888	Gm2415
ENSMUSG00000072919	14.5343	2.98226	1.12459	-2.65187	0.00800479	0.0448487	Noxred1
ENSMUSG00000020553	339.757	2.98217	0.576299	-5.17469	2.28286e-07	5.42825e-06	Pctp
ENSMUSG00000040713	4795.79	2.982	0.578751	-5.15247	2.57076e-07	5.97067e-06	Creg1
ENSMUSG00000026833	185.903	2.98098	0.685436	-4.34902	1.36744e-05	0.000208695	Olfm1
ENSMUSG00000027555	53.7611	2.97579	0.748616	-3.97506	7.03618e-05	0.000850462	Car13
ENSMUSG00000091730	4.90868	2.97428	1.46575	-2.02919	0.0424392	0.161564	Gm17230
ENSMUSG00000034361	191.646	2.97406	0.702854	-4.2314	2.32237e-05	0.00032753	Cpne2
ENSMUSG00000025969	319.351	2.97365	0.746418	-3.9839	6.77928e-05	0.000822522	Nrp2
ENSMUSG00000027935	73.8703	2.96923	0.718727	-4.13124	3.60817e-05	0.000480859	Rab13
ENSMUSG00000009376	29.6427	2.96628	0.870915	-3.40593	0.000659381	0.00563436	Met
ENSMUSG00000078566	934.788	2.96515	0.746763	-3.97067	7.16705e-05	0.000862366	Bnip3
ENSMUSG00000097051	6.90322	2.9638	1.318	-2.24871	0.0245312	0.107567	Gm26836
ENSMUSG00000041075	12.9966	2.95961	1.1088	-2.6692	0.00760321	0.0430822	Fzd7
ENSMUSG00000030486	11.7763	2.95746	1.22176	-2.42066	0.0154925	0.075382	Zfp108
ENSMUSG00000085546	71.712	2.9545	0.729766	-4.04856	5.15345e-05	0.000652989	Gm14252
ENSMUSG00000021038	1735.29	2.954	0.595106	-4.96382	6.91192e-07	1.46869e-05	Vipas39
ENSMUSG00000091089	6.86512	2.9527	1.37205	-2.15203	0.0313952	0.129295	A930018M24Rik
ENSMUSG00000086773	42.629	2.94642	0.802955	-3.66947	0.000243049	0.00243339	Gm16192
ENSMUSG00000108393	145.049	2.94537	0.953384	-3.08939	0.00200569	0.0143717	RP23-402A4.1
ENSMUSG00000041488	158.386	2.94284	0.630472	-4.66768	3.04619e-06	5.53126e-05	Stx3
ENSMUSG00000085890	170.492	2.94227	0.723799	-4.06504	4.80251e-05	0.000612934	Tnfsf13os
ENSMUSG00000025511	937.963	2.93999	0.611057	-4.81132	1.49933e-06	2.93159e-05	Tspan4
ENSMUSG00000050708	14305.5	2.93833	0.543505	-5.40627	6.435e-08	1.71948e-06	Ftl1
ENSMUSG00000020021	80.4789	2.93798	0.781851	-3.75773	0.000171463	0.0018241	Fgd6
ENSMUSG00000096954	366.923	2.93613	0.59801	-4.90984	9.11526e-07	1.88425e-05	Gdap10
ENSMUSG00000028182	4.70275	2.93577	1.46651	-2.00187	0.0452988	0.169264	Lrriq3
ENSMUSG00000056220	1611.67	2.92287	0.707781	-4.12962	3.63359e-05	0.00048344	Pla2g4a
ENSMUSG00000019768	62.7628	2.92218	0.723975	-4.0363	5.43008e-05	0.000681596	Esr1
ENSMUSG00000026866	56.4152	2.92158	0.905538	-3.22635	0.00125379	0.00969713	Kynu
ENSMUSG00000080727	608.074	2.92034	0.656588	-4.44774	8.6777e-06	0.000139638	C920021L13Rik
ENSMUSG00000042272	262.703	2.91774	0.607927	-4.79949	1.59072e-06	3.08099e-05	Sestd1
ENSMUSG00000024891	22.9762	2.91696	1.12264	-2.5983	0.00936856	0.0508147	Slc29a2
ENSMUSG00000034413	41.3307	2.91471	0.811717	-3.59079	0.000329676	0.00315254	Neurl1b
ENSMUSG00000015452	4.59978	2.90805	1.46922	-1.97931	0.0477807	0.176447	Ager
ENSMUSG00000030259	10.5164	2.90575	1.19021	-2.44137	0.0146317	0.0720648	Rassf8
ENSMUSG00000097887	57.9194	2.9043	0.956298	-3.03702	0.0023893	0.0167083	Gm26542
ENSMUSG00000037344	614.336	2.90418	0.757829	-3.83224	0.000126982	0.00141004	Slc12a9
ENSMUSG00000002111	2915.91	2.90188	0.618368	-4.69281	2.69476e-06	4.96078e-05	Spi1
ENSMUSG00000001750	5501.5	2.89805	0.935636	-3.09741	0.00195218	0.0140577	Tcirg1
ENSMUSG00000102336	8.64483	2.89648	1.31313	-2.20577	0.0273998	0.117106	Gm37233
ENSMUSG00000086191	6.6481	2.89607	1.32826	-2.18035	0.0292313	0.122703	Zfp652os
ENSMUSG00000024644	7864.82	2.89492	0.533351	-5.4278	5.70522e-08	1.53474e-06	Cndp2
ENSMUSG00000054640	61.9481	2.89445	0.74992	-3.85968	0.000113536	0.00128575	Slc8a1
ENSMUSG00000060538	1577.62	2.89198	0.540674	-5.34884	8.85212e-08	2.30371e-06	Tmem219
ENSMUSG00000036381	1069.16	2.88886	0.636064	-4.54178	5.57805e-06	9.45667e-05	P2ry14
ENSMUSG00000039783	520.343	2.88749	0.636651	-4.53543	5.74851e-06	9.67918e-05	Kmo
ENSMUSG00000034265	22.1281	2.88401	0.947845	-3.0427	0.00234465	0.0164537	Zdhhc14
ENSMUSG00000024732	1326.57	2.88369	0.541617	-5.32421	1.01391e-07	2.57983e-06	Ccdc86
ENSMUSG00000062382	14876.3	2.88283	0.550078	-5.24076	1.59915e-07	3.9312e-06	Gm10116
ENSMUSG00000022540	842.544	2.87929	0.695935	-4.1373	3.51421e-05	0.000472275	Rogdi
ENSMUSG00000108365	58.0886	2.87788	0.94829	-3.03481	0.00240684	0.0168156	RP24-174G2.2
ENSMUSG00000039206	2134.04	2.87445	0.56453	-5.09176	3.5475e-07	7.99513e-06	Daglb
ENSMUSG00000104369	23.4354	2.87441	1.02435	-2.80608	0.00501481	0.0309627	Gm38082
ENSMUSG00000108291	58.6526	2.87044	0.760061	-3.77659	0.000158992	0.00170708	Gm44292
ENSMUSG00000086603	31.7787	2.86946	0.850974	-3.37197	0.000746329	0.00626344	Gm13620
ENSMUSG00000020175	46.4388	2.86863	0.804391	-3.56622	0.000362169	0.00341019	Rab36
ENSMUSG00000052270	494.189	2.85987	0.641003	-4.46155	8.13707e-06	0.000132002	Fpr2
ENSMUSG00000062593	5286.01	2.85875	0.63805	-4.48044	7.4489e-06	0.000122455	Lilrb4a
ENSMUSG00000078956	6.46676	2.85773	1.33577	-2.13938	0.032405	0.132497	Gm14221
ENSMUSG00000034707	1383.64	2.85755	0.62327	-4.58477	4.54491e-06	7.88525e-05	Gns
ENSMUSG00000025779	283.762	2.85682	0.669931	-4.26435	2.00485e-05	0.000288608	Ly96
ENSMUSG00000108604	7.40235	2.85652	1.35816	-2.10323	0.0354455	0.141454	RP23-144N15.10
ENSMUSG00000081219	58.0578	2.85597	0.795571	-3.58984	0.000330885	0.00316032	Bambi-ps1
ENSMUSG00000025492	14041.7	2.85479	0.581189	-4.91199	9.01548e-07	1.86846e-05	Ifitm3
ENSMUSG00000032375	96.5518	2.85351	0.730897	-3.90412	9.4569e-05	0.00109185	Aph1b
ENSMUSG00000021069	968.263	2.85104	0.569409	-5.00702	5.52795e-07	1.19528e-05	Pygl
ENSMUSG00000082062	6.37949	2.84717	1.38197	-2.06022	0.0393776	0.152833	Ftl2-ps
ENSMUSG00000004296	135.196	2.84447	0.820904	-3.46505	0.000530141	0.00470661	Il12b
ENSMUSG00000031700	86.9272	2.84328	0.853515	-3.33126	0.000864544	0.00708802	Gpt2
ENSMUSG00000040624	42.9897	2.84086	0.875735	-3.24397	0.00117875	0.00923749	Plekhg1
ENSMUSG00000090017	17.7806	2.83543	1.0331	-2.74459	0.00605874	0.035777	Gm16213
ENSMUSG00000021687	362.474	2.83304	0.633486	-4.47214	7.74417e-06	0.000126638	Scamp1
ENSMUSG00000009731	15.4191	2.83074	1.09118	-2.59419	0.00948146	0.0513748	Kcnd1
ENSMUSG00000078122	70.2705	2.82965	0.793017	-3.56821	0.000359433	0.00338684	F630028O10Rik
ENSMUSG00000016529	52.3667	2.82622	0.796404	-3.54872	0.000387106	0.00360464	Il10
ENSMUSG00000030424	14.0199	2.82497	1.07344	-2.63169	0.00849608	0.0469499	Zfp939
ENSMUSG00000032220	1452.32	2.82445	0.75837	-3.72436	0.000195808	0.00203625	Myo1e
ENSMUSG00000035390	15.8733	2.82382	1.05811	-2.66875	0.00761337	0.0431187	Brsk1
ENSMUSG00000035783	15.5576	2.82379	1.11831	-2.52505	0.0115681	0.0600544	Acta2
ENSMUSG00000036989	156.997	2.82352	0.752493	-3.75222	0.000175275	0.00185601	Trim3
ENSMUSG00000023903	535.174	2.82285	1.57151	-1.79626	0.0724524	0.234974	Mmp25
ENSMUSG00000022964	3541.26	2.82229	0.533961	-5.28557	1.25311e-07	3.12377e-06	Tmem50b
ENSMUSG00000006241	9.92321	2.82171	1.20542	-2.34085	0.0192399	0.0896312	Ccdc159
ENSMUSG00000031138	10.1672	2.82044	1.1768	-2.3967	0.0165433	0.0793117	F9
ENSMUSG00000031808	383.185	2.81664	0.884106	-3.18587	0.00144321	0.0108804	Slc27a1
ENSMUSG00000071335	6.30111	2.81506	1.39292	-2.02097	0.0432824	0.163928	G630090E17Rik
ENSMUSG00000082433	1501.78	2.8148	0.646962	-4.3508	1.35644e-05	0.000207412	Gm9025
ENSMUSG00000053113	3858.11	2.81307	1.00742	-2.79237	0.00523243	0.0320464	Socs3
ENSMUSG00000071669	322.112	2.81259	0.64696	-4.34739	1.37768e-05	0.000209856	Snx29
ENSMUSG00000026073	2723.97	2.81197	0.657466	-4.27698	1.89448e-05	0.00027545	Il1r2
ENSMUSG00000108897	8.49049	2.81153	1.25071	-2.24794	0.02458	0.107695	RP24-88J19.4
ENSMUSG00000098320	8.33593	2.8115	1.33943	-2.09902	0.0358147	0.14239	Vis1
ENSMUSG00000003812	632.784	2.81055	0.567715	-4.95063	7.39736e-07	1.55734e-05	Dnase2a
ENSMUSG00000001247	326.515	2.80883	0.885462	-3.17216	0.0015131	0.0112981	Lsr
ENSMUSG00000024043	8.52189	2.80625	1.348	-2.08179	0.0373614	0.146947	Arhgap28
ENSMUSG00000060224	7.99135	2.80496	1.25817	-2.2294	0.025787	0.111727	Pyroxd2
ENSMUSG00000106856	14.6173	2.80397	1.10944	-2.52738	0.0114918	0.0597165	Gm43761
ENSMUSG00000020057	529.171	2.80168	0.573556	-4.88475	1.0356e-06	2.09999e-05	Dram1
ENSMUSG00000020010	207.294	2.8004	0.659913	-4.2436	2.19967e-05	0.000312431	Vnn3
ENSMUSG00000042659	188.304	2.79999	0.650131	-4.30681	1.65629e-05	0.000246427	Arrdc4
ENSMUSG00000051510	431.945	2.79931	0.761443	-3.67632	0.000236627	0.00237952	Mafg
ENSMUSG00000044092	571.968	2.79907	0.572867	-4.88607	1.02871e-06	2.08866e-05	C130050O18Rik
ENSMUSG00000101223	57.9126	2.79688	0.731395	-3.82404	0.000131282	0.00144873	4930568A12Rik
ENSMUSG00000071176	320.075	2.79631	0.714439	-3.914	9.07815e-05	0.00105421	Arhgef10
ENSMUSG00000026536	1336.74	2.79455	0.684969	-4.07982	4.50713e-05	0.0005794	Mnda
ENSMUSG00000016496	1560.09	2.79328	0.66541	-4.19782	2.69491e-05	0.000371865	Cd274
ENSMUSG00000087196	17.5275	2.79189	1.09664	-2.54586	0.0109008	0.0573919	Gm13373
ENSMUSG00000058325	191.17	2.78981	0.605056	-4.61083	4.01063e-06	7.03468e-05	Dock1
ENSMUSG00000022263	72.1307	2.78975	0.711008	-3.92366	8.72133e-05	0.00102084	Trio
ENSMUSG00000033227	22.0612	2.78947	0.986079	-2.82885	0.00467151	0.02917	Wnt6
ENSMUSG00000042228	4085.06	2.78901	0.562766	-4.95591	7.19934e-07	1.52369e-05	Lyn
ENSMUSG00000031851	1083.54	2.78333	0.569897	-4.88393	1.03994e-06	2.10612e-05	Ntpcr
ENSMUSG00000022432	42.2271	2.77955	0.894576	-3.10711	0.00188924	0.013697	Smc1b
ENSMUSG00000078616	162.617	2.77931	0.776754	-3.57811	0.000346092	0.00328056	Trim30c
ENSMUSG00000043895	1417.83	2.77604	0.91049	-3.04896	0.00229638	0.0161647	S1pr2
ENSMUSG00000093768	490.131	2.77593	0.587791	-4.72265	2.32797e-06	4.35071e-05	Gm20650
ENSMUSG00000038872	173.796	2.77279	0.608815	-4.5544	5.25354e-06	8.96863e-05	Zfhx3
ENSMUSG00000032122	2406.03	2.77044	0.635781	-4.35754	1.31535e-05	0.000202097	Slc37a2
ENSMUSG00000022517	1387.56	2.76991	0.899769	-3.07847	0.00208065	0.0148556	Mgrn1
ENSMUSG00000068874	73.1065	2.76987	0.695068	-3.98504	6.74701e-05	0.000819852	Selenbp1
ENSMUSG00000108155	13.7466	2.7693	1.15468	-2.39831	0.0164708	0.0790589	Gm44443
ENSMUSG00000078452	66.4618	2.7673	0.738118	-3.74912	0.000177453	0.00187658	Raet1d
ENSMUSG00000039960	11.9312	2.76398	1.13574	-2.43365	0.0149475	0.0732655	Rhou
ENSMUSG00000024887	41.2064	2.76397	0.832832	-3.31876	0.000904168	0.00737128	Asah2
ENSMUSG00000021003	226.356	2.76084	0.75668	-3.64862	0.000263651	0.00261507	Galc
ENSMUSG00000107928	6.07058	2.75958	1.3997	-1.97155	0.0486614	0.178288	RP23-4F16.12
ENSMUSG00000059742	11.8821	2.75933	1.13086	-2.44002	0.0146864	0.072274	Kcnh7
ENSMUSG00000073489	4403.46	2.75747	0.655785	-4.20484	2.6127e-05	0.000362713	Ifi204
ENSMUSG00000028041	562.357	2.75708	1.01137	-2.72609	0.00640896	0.0373313	Adam15
ENSMUSG00000028553	7.90408	2.75561	1.3306	-2.07096	0.0383629	0.14995	Angptl3
ENSMUSG00000021579	43.2164	2.75207	0.833936	-3.30009	0.000966522	0.00778823	Lrrc14b
ENSMUSG00000103596	18.6763	2.74892	0.994189	-2.76498	0.00569259	0.0340681	Gm37354
ENSMUSG00000030559	6.02141	2.74867	1.39718	-1.9673	0.0491491	0.179525	Rab38
ENSMUSG00000025584	68.4639	2.74445	0.706153	-3.88648	0.000101706	0.00116499	Pde8a
ENSMUSG00000031563	21.5374	2.74348	1.04146	-2.63427	0.00843175	0.0466358	Wwc2
ENSMUSG00000102813	16.5272	2.74118	1.11128	-2.4667	0.0136366	0.0683895	Gm37795
ENSMUSG00000042672	4.13873	2.73803	1.48942	-1.83832	0.0660154	0.219808	Dcst1
ENSMUSG00000092920	4.13873	2.73803	1.48942	-1.83832	0.0660154	0.219808	Mirt2
ENSMUSG00000031169	29.2137	2.73769	0.86322	-3.17148	0.00151663	0.0113191	Porcn
ENSMUSG00000035891	283.916	2.73607	0.622098	-4.39813	1.09186e-05	0.000171568	Cerk
ENSMUSG00000069516	99556.2	2.73577	0.617019	-4.43385	9.25662e-06	0.000147764	Lyz2
ENSMUSG00000017713	67.1683	2.73536	0.781443	-3.5004	0.000464567	0.0042154	Tha1
ENSMUSG00000026480	1292.85	2.7351	0.611611	-4.47195	7.75093e-06	0.000126638	Ncf2
ENSMUSG00000087380	39.01	2.73119	0.825394	-3.30895	0.000936456	0.0075919	2210408F21Rik
ENSMUSG00000030659	538.847	2.73037	0.653553	-4.17773	2.94432e-05	0.000402458	Nucb2
ENSMUSG00000053004	4.18791	2.72943	1.4972	-1.82302	0.0683007	0.225119	Hrh1
ENSMUSG00000038451	299.602	2.72381	0.695553	-3.91604	9.00157e-05	0.00104837	Spsb2
ENSMUSG00000103899	56.634	2.7233	1.04556	-2.60464	0.00919708	0.050188	Gm37940
ENSMUSG00000018381	3747.1	2.72327	0.784482	-3.47142	0.000517712	0.00462152	Abi3
ENSMUSG00000042647	47.0248	2.71993	0.951182	-2.85953	0.00424275	0.0269027	Acad12
ENSMUSG00000031385	100.736	2.71931	1.02653	-2.64904	0.0080721	0.0451467	Plxnb3
ENSMUSG00000028300	770.051	2.7192	0.643069	-4.22847	2.35285e-05	0.000331244	3110043O21Rik
ENSMUSG00000009941	9.11719	2.71792	1.31246	-2.07086	0.038372	0.14995	Nxf2
ENSMUSG00000022489	56.559	2.71771	0.879416	-3.09036	0.00199915	0.01434	Pde1b
ENSMUSG00000030670	56.1718	2.7158	0.731557	-3.71236	0.000205336	0.00210865	Cyp2r1
ENSMUSG00000051579	237.435	2.71443	0.759211	-3.57534	0.000349776	0.00330714	Tceal8
ENSMUSG00000031097	29.9654	2.71161	0.952074	-2.84811	0.004398	0.0277222	Tnni2
ENSMUSG00000042500	48.1234	2.70952	0.785052	-3.45139	0.000557699	0.0049099	Ago4
ENSMUSG00000039450	385.005	2.70806	0.571325	-4.73995	2.13767e-06	4.02805e-05	Dcxr
ENSMUSG00000101585	247.405	2.70767	0.714836	-3.78782	0.000151976	0.00164416	1600010M07Rik
ENSMUSG00000024121	1014.98	2.7047	0.544934	-4.96336	6.92857e-07	1.47027e-05	Atp6v0c
ENSMUSG00000025375	18.3026	2.70406	1.16597	-2.31915	0.0203871	0.0934495	Aatk
ENSMUSG00000020150	55.7527	2.70361	0.754771	-3.58203	0.000340931	0.00323692	Gamt
ENSMUSG00000052914	9.37489	2.70297	1.28806	-2.09849	0.0358623	0.142407	Cyp2j6
ENSMUSG00000031494	500.231	2.70148	0.720612	-3.74887	0.000177634	0.00187704	Cd209a
ENSMUSG00000098188	269.651	2.69928	0.71259	-3.78799	0.000151873	0.00164416	Sowahc
ENSMUSG00000030089	151.147	2.69902	1.04914	-2.57261	0.0100935	0.0539049	Slc41a3
ENSMUSG00000044252	106.69	2.69717	0.655813	-4.11271	3.91042e-05	0.0005147	Osbpl1a
ENSMUSG00000029771	2880.67	2.69625	0.771916	-3.49293	0.000477753	0.00431989	Irf5
ENSMUSG00000071713	940.253	2.69597	0.706561	-3.81562	0.000135841	0.00148977	Csf2rb
ENSMUSG00000025464	117.246	2.6951	0.688067	-3.91692	8.96893e-05	0.00104533	Paox
ENSMUSG00000040528	873.214	2.6928	0.654931	-4.11157	3.92972e-05	0.00051639	Milr1
ENSMUSG00000036473	25.8201	2.69164	0.947411	-2.84105	0.0044965	0.0282317	Tbc1d24
ENSMUSG00000092268	9.42407	2.69158	1.30303	-2.06563	0.0388635	0.151463	Gm20540
ENSMUSG00000021118	9.07949	2.68844	1.21661	-2.20978	0.0271204	0.116275	Plek2
ENSMUSG00000028744	909.095	2.68775	0.544238	-4.93856	7.86997e-07	1.64385e-05	Pqlc2
ENSMUSG00000051498	541.553	2.68723	0.649743	-4.13584	3.53659e-05	0.000474087	Tlr6
ENSMUSG00000013089	328.679	2.68722	0.834396	-3.22056	0.0012794	0.00984756	Etv5
ENSMUSG00000042826	11.4835	2.68614	1.29431	-2.07535	0.0379544	0.148779	Fgf11
ENSMUSG00000015839	4778.11	2.68379	0.577711	-4.64556	3.39162e-06	6.06205e-05	Nfe2l2
ENSMUSG00000030123	175.237	2.67595	0.955582	-2.80034	0.00510488	0.0313975	Plxnd1
ENSMUSG00000096010	72.4952	2.67517	0.773219	-3.45979	0.000540602	0.0047831	Hist4h4
ENSMUSG00000078486	14.311	2.6748	1.15665	-2.31253	0.0207483	0.0946656	Perm1
ENSMUSG00000039873	85.5819	2.67315	0.802	-3.3331	0.000858827	0.007052	Neurl2
ENSMUSG00000002799	7.5168	2.67215	1.34974	-1.97975	0.0477314	0.176306	Jag2
ENSMUSG00000052151	161.497	2.67212	0.838486	-3.18684	0.00143834	0.0108565	Plpp2
ENSMUSG00000109110	4.01118	2.66726	1.4999	-1.77829	0.0753568	0.24155	RP23-423B21.7
ENSMUSG00000034330	1961.73	2.66645	0.716584	-3.72106	0.000198384	0.0020571	Plcg2
ENSMUSG00000060063	4903.44	2.66394	0.692287	-3.84803	0.000119074	0.00133992	Alox5ap
ENSMUSG00000024664	12.227	2.66297	1.14831	-2.31903	0.0203932	0.0934508	Fads3
ENSMUSG00000000248	11.8664	2.66262	1.16968	-2.27637	0.0228241	0.101845	Clec2g
ENSMUSG00000052749	215.124	2.66068	0.602339	-4.41725	9.99651e-06	0.000158309	Trim30b
ENSMUSG00000048621	632.718	2.66058	0.759933	-3.50107	0.000463397	0.00420717	Gm6377
ENSMUSG00000015396	3137.75	2.65498	0.695638	-3.81662	0.000135293	0.00148478	Cd83
ENSMUSG00000045917	619.581	2.65432	0.752871	-3.52559	0.00042254	0.00388702	6330416G13Rik
ENSMUSG00000060044	284.743	2.65042	0.6288	-4.21504	2.49737e-05	0.000349206	Tmem26
ENSMUSG00000030223	1416.64	2.64899	0.613284	-4.31936	1.56483e-05	0.000235668	Ptpro
ENSMUSG00000057191	2021.71	2.64784	0.539741	-4.90576	9.30681e-07	1.91404e-05	AB124611
ENSMUSG00000109036	117.001	2.64695	0.700759	-3.77726	0.000158562	0.00170388	RP24-417N13.7
ENSMUSG00000062585	179.294	2.64653	0.656475	-4.03142	5.54401e-05	0.000693718	Cnr2
ENSMUSG00000037295	860.769	2.64612	0.987602	-2.67934	0.00737672	0.0420823	Ldlrap1
ENSMUSG00000034591	43.6583	2.64581	0.796979	-3.3198	0.000900833	0.00735159	Slc41a2
ENSMUSG00000026390	20.1632	2.64567	1.00884	-2.62249	0.00872909	0.048031	Marco
ENSMUSG00000104187	10.4227	2.64277	1.17995	-2.23974	0.0251079	0.109617	Gm37820
ENSMUSG00000052477	203.047	2.64195	0.645821	-4.09084	4.29821e-05	0.000555672	C130026I21Rik
ENSMUSG00000001227	5.60954	2.64107	1.41447	-1.86718	0.0618763	0.210897	Sema6b
ENSMUSG00000026360	2623.44	2.64053	0.540167	-4.88836	1.0168e-06	2.06711e-05	Rgs2
ENSMUSG00000002475	15.6143	2.63343	1.13097	-2.32846	0.0198874	0.0917802	Abhd3
ENSMUSG00000039308	212.765	2.63168	0.600086	-4.3855	1.1572e-05	0.000180048	Ndst2
ENSMUSG00000038564	175.457	2.63137	0.796519	-3.30359	0.000954558	0.00771516	Ift172
ENSMUSG00000020841	365.189	2.62969	0.639212	-4.11395	3.88943e-05	0.000512783	Cpd
ENSMUSG00000107317	3577.79	2.62559	0.695415	-3.77558	0.000159636	0.00171197	Gm19719
ENSMUSG00000027175	20.0022	2.62449	1.05752	-2.48173	0.0130746	0.0660507	Tcp11l1
ENSMUSG00000108461	33.4942	2.62353	0.859416	-3.05269	0.00226799	0.015986	RP24-157O12.2
ENSMUSG00000020407	358.772	2.61999	0.578354	-4.53008	5.89602e-06	9.87552e-05	Upp1
ENSMUSG00000091119	3.82983	2.61988	1.50429	-1.74161	0.0815774	0.255643	Ccdc152
ENSMUSG00000028634	170.687	2.61758	0.637451	-4.10632	4.02019e-05	0.000525254	Hivep3
ENSMUSG00000066150	2199.22	2.61558	0.596024	-4.38839	1.14195e-05	0.000178196	Slc31a1
ENSMUSG00000054072	8023.54	2.61378	0.687472	-3.80202	0.000143524	0.00156011	Iigp1
ENSMUSG00000095028	522.5	2.61316	0.686999	-3.80373	0.000142531	0.00155249	Sirpb1b
ENSMUSG00000070780	775.256	2.61284	0.582035	-4.48915	7.15089e-06	0.00011792	Rbm47
ENSMUSG00000029084	4520.56	2.604	0.65516	-3.97459	7.04993e-05	0.00085148	Cd38
ENSMUSG00000096971	6.66161	2.60156	1.41412	-1.8397	0.0658116	0.219442	4930556M19Rik
ENSMUSG00000031681	182.158	2.60117	0.63479	-4.09769	4.1729e-05	0.000541664	Smad1
ENSMUSG00000023452	669.901	2.60083	0.637336	-4.08078	4.48841e-05	0.000577924	Pisd
ENSMUSG00000105378	18.0317	2.59604	1.03745	-2.50232	0.0123381	0.0631086	Gm42515
ENSMUSG00000015340	19484.7	2.59504	0.648257	-4.00311	6.25148e-05	0.000768756	Cybb
ENSMUSG00000033644	61.4788	2.59224	0.88405	-2.93224	0.00336531	0.022276	Piwil2
ENSMUSG00000027293	7643.2	2.59107	0.600108	-4.31768	1.57677e-05	0.000236797	Ehd4
ENSMUSG00000036820	1331.13	2.59101	0.779315	-3.32472	0.000885065	0.0072414	Amdhd2
ENSMUSG00000073478	49.0761	2.58861	0.752488	-3.44007	0.000581566	0.00507806	D730003I15Rik
ENSMUSG00000056458	16.3241	2.58675	1.03978	-2.48778	0.0128545	0.0651241	Mok
ENSMUSG00000030748	2589.24	2.58464	0.97483	-2.65137	0.0080165	0.0448828	Il4ra
ENSMUSG00000055013	40.2241	2.584	0.856428	-3.01719	0.00255131	0.0176177	Agap1
ENSMUSG00000020085	170.041	2.5829	0.641562	-4.02595	5.67457e-05	0.000707837	Aifm2
ENSMUSG00000059182	5377.67	2.58056	0.59033	-4.37139	1.23456e-05	0.000190968	Skap2
ENSMUSG00000097859	3.85442	2.57564	1.5176	-1.69718	0.0896622	0.272172	Gm26601
ENSMUSG00000023067	1728.08	2.57531	0.648455	-3.97146	7.14339e-05	0.000860168	Cdkn1a
ENSMUSG00000105848	3.70227	2.57477	1.50735	-1.70815	0.0876087	0.268562	Gm42683
ENSMUSG00000020717	3165.66	2.57316	0.559174	-4.60172	4.19023e-06	7.30958e-05	Pecam1
ENSMUSG00000028362	118.568	2.57164	0.635554	-4.0463	5.20343e-05	0.000657278	Tnfsf8
ENSMUSG00000028527	5.35443	2.57139	1.42115	-1.80937	0.0703928	0.229881	Ak4
ENSMUSG00000080242	2655.63	2.57108	0.535363	-4.8025	1.56697e-06	3.04235e-05	Gm15487
ENSMUSG00000108701	507.264	2.56887	0.560635	-4.58208	4.60381e-06	7.97281e-05	RP23-26J4.3
ENSMUSG00000030341	1454.12	2.56846	0.643397	-3.99203	6.55106e-05	0.000797861	Tnfrsf1a
ENSMUSG00000105374	7.2595	2.56751	1.2853	-1.9976	0.0457598	0.170482	Gm42551
ENSMUSG00000039891	22.4894	2.56744	0.942187	-2.72498	0.0064306	0.0374333	Txlnb
ENSMUSG00000040219	5.53577	2.56662	1.435	-1.78859	0.0736806	0.237751	Ttc12
ENSMUSG00000097077	639.308	2.56609	0.592834	-4.32852	1.50114e-05	0.000227147	Gm16712
ENSMUSG00000020227	1186.33	2.5612	0.581527	-4.40427	1.06143e-05	0.000167099	Irak3
ENSMUSG00000028690	55.3114	2.55883	0.736846	-3.47268	0.000515294	0.0046025	Mmachc
ENSMUSG00000086327	41.8992	2.55822	0.916912	-2.79004	0.00527014	0.0322156	Slfn5os
ENSMUSG00000104823	7.08496	2.55619	1.37025	-1.86549	0.0621127	0.21126	Gm43182
ENSMUSG00000063388	98.8201	2.55525	0.959884	-2.66205	0.00776674	0.0437147	BC023105
ENSMUSG00000054545	16.791	2.55334	1.21921	-2.09425	0.0362376	0.143576	Ugt1a6a
ENSMUSG00000026893	161.947	2.55274	0.74048	-3.44741	0.000565979	0.0049691	Gca
ENSMUSG00000028037	1517.74	2.55134	0.700238	-3.64354	0.000268917	0.00265576	Ifi44
ENSMUSG00000107355	77.9933	2.5511	0.695372	-3.66868	0.000243809	0.00243946	AI839979
ENSMUSG00000030465	9.83414	2.5494	1.19314	-2.13672	0.0326211	0.133084	Psd3
ENSMUSG00000028645	1279.16	2.54881	0.729411	-3.49434	0.000475239	0.00430002	Slc2a1
ENSMUSG00000023973	1674.72	2.54769	0.843968	-3.0187	0.00253859	0.0175527	Cnpy3
ENSMUSG00000030844	1647.99	2.54697	0.585793	-4.3479	1.37446e-05	0.000209565	Rgs10
ENSMUSG00000109244	42.1353	2.54694	0.925008	-2.75343	0.00589744	0.0350577	RP24-330M21.1
ENSMUSG00000020376	296.629	2.54585	0.617083	-4.12563	3.69729e-05	0.000490717	Rnf130
ENSMUSG00000060519	7607.98	2.54544	0.546194	-4.66033	3.15702e-06	5.71302e-05	Tor3a
ENSMUSG00000073590	5.25146	2.54341	1.42523	-1.78456	0.0743323	0.239515	3222401L13Rik
ENSMUSG00000047407	1933.8	2.5415	0.555489	-4.57525	4.75651e-06	8.20573e-05	Tgif1
ENSMUSG00000099930	10.4943	2.53953	1.18642	-2.14049	0.0323152	0.132232	Gm2396
ENSMUSG00000020818	770.282	2.53859	0.602277	-4.21499	2.49787e-05	0.000349206	Mfsd11
ENSMUSG00000039217	151.147	2.53722	0.678438	-3.73979	0.000184171	0.00193228	Il18
ENSMUSG00000055323	25.1157	2.53405	0.89937	-2.81758	0.00483871	0.0300613	Gm9967
ENSMUSG00000028028	193.486	2.53339	0.626129	-4.04611	5.20754e-05	0.000657278	Alpk1
ENSMUSG00000040978	12.8896	2.53296	1.15361	-2.19568	0.0281147	0.119068	Gm11992
ENSMUSG00000021457	1244.74	2.53199	0.781952	-3.23804	0.00120354	0.00938393	Syk
ENSMUSG00000003541	407.705	2.53193	0.569636	-4.44483	8.79632e-06	0.000141405	Ier3
ENSMUSG00000030681	3152.52	2.5316	0.698669	-3.62346	0.000290685	0.00283223	Mvp
ENSMUSG00000096802	12.7266	2.53127	1.13421	-2.23175	0.0256313	0.111294	Gm15433
ENSMUSG00000108502	20.9245	2.53003	0.963118	-2.62692	0.00861624	0.0475298	RP23-11L1.1
ENSMUSG00000025876	11.8109	2.52869	1.26581	-1.99769	0.0457497	0.170482	Unc5a
ENSMUSG00000044468	331.55	2.52841	0.699869	-3.61269	0.000303034	0.00294137	Fam46c
ENSMUSG00000050762	6.80064	2.528	1.36365	-1.85385	0.0637603	0.214897	Prss27
ENSMUSG00000025887	116.717	2.52713	0.64624	-3.91051	9.20997e-05	0.00106797	Casp12
ENSMUSG00000106175	329.58	2.52626	0.659867	-3.82843	0.000128963	0.00142708	Gm44313
ENSMUSG00000015950	1605.28	2.52575	0.584195	-4.32347	1.53597e-05	0.000231977	Ncf1
ENSMUSG00000029998	1044.44	2.52355	0.625256	-4.03603	5.43636e-05	0.00068185	Pcyox1
ENSMUSG00000029049	15.7063	2.52142	1.05868	-2.38167	0.0172345	0.081791	Morn1
ENSMUSG00000019088	1098.93	2.51971	0.580781	-4.33848	1.4347e-05	0.000217506	Dnase1l1
ENSMUSG00000032698	81.3056	2.51871	0.683691	-3.68399	0.000229614	0.00232068	Lmo2
ENSMUSG00000020102	120.111	2.51669	0.76259	-3.30018	0.000966219	0.00778823	Slc16a7
ENSMUSG00000005803	558.171	2.51469	0.554854	-4.53216	5.83845e-06	9.80994e-05	Sqrdl
ENSMUSG00000032502	12.7401	2.51369	1.10082	-2.28348	0.0224023	0.100383	Stac
ENSMUSG00000105801	6.6328	2.51356	1.30117	-1.93178	0.0533872	0.190802	C430019N01Rik
ENSMUSG00000026228	8.03834	2.51043	1.34747	-1.86308	0.0624514	0.21184	Htr2b
ENSMUSG00000032841	672.71	2.50837	0.654796	-3.83076	0.000127746	0.00141655	Prr5l
ENSMUSG00000025702	95.1836	2.50813	0.675466	-3.71318	0.000204669	0.00210685	March8
ENSMUSG00000087277	10.4248	2.50783	1.32175	-1.89735	0.0577817	0.201417	2010013B24Rik
ENSMUSG00000033739	162.532	2.50682	0.639026	-3.92287	8.75008e-05	0.00102206	Fkbpl
ENSMUSG00000028926	379.058	2.5064	0.570095	-4.39647	1.10027e-05	0.000172365	Cdk14
ENSMUSG00000038256	33.7436	2.5028	1.03315	-2.4225	0.0154141	0.0750465	Bcl9
ENSMUSG00000029291	142.794	2.50189	0.621958	-4.0226	5.75596e-05	0.000715755	Rufy3
ENSMUSG00000072889	161.694	2.49566	0.608311	-4.1026	4.08536e-05	0.000531596	Nfxl1
ENSMUSG00000031402	2278	2.49549	0.536954	-4.64749	3.35998e-06	6.01896e-05	Mpp1
ENSMUSG00000031907	399.915	2.49364	0.579966	-4.29963	1.71081e-05	0.00025359	Zfp90
ENSMUSG00000049999	34.7644	2.4936	1.11926	-2.22791	0.0258866	0.112007	Ppp1r3d
ENSMUSG00000027490	294.155	2.49183	0.686208	-3.6313	0.000281993	0.00276779	E2f1
ENSMUSG00000103973	8.7684	2.4907	1.23651	-2.0143	0.0439784	0.165738	BC055308
ENSMUSG00000097650	3.62389	2.48973	1.52521	-1.63238	0.102599	0.298034	4921507G05Rik
ENSMUSG00000106232	3.62389	2.48973	1.52521	-1.63238	0.102599	0.298034	Gm43236
ENSMUSG00000051495	228.193	2.48917	0.68909	-3.61226	0.000303543	0.00294137	Irf2bp2
ENSMUSG00000008305	13.6935	2.48776	1.1064	-2.24851	0.0245438	0.107567	Tle1
ENSMUSG00000017607	135.236	2.48713	0.644968	-3.85621	0.00011516	0.00130045	Tns4
ENSMUSG00000036636	1586.91	2.48684	0.909136	-2.73539	0.00623057	0.0366023	Clcn7
ENSMUSG00000048277	4980.71	2.48668	0.560108	-4.43965	9.0107e-06	0.000144705	Syngr2
ENSMUSG00000029185	164.6	2.48534	0.612033	-4.06079	4.8907e-05	0.000622201	Fam114a1
ENSMUSG00000097855	49.03	2.48284	0.792176	-3.1342	0.00172323	0.0126433	A930007I19Rik
ENSMUSG00000024781	5578.9	2.48233	0.538183	-4.61243	3.97993e-06	6.99618e-05	Lipa
ENSMUSG00000046805	2097.67	2.48038	0.717804	-3.45551	0.000549261	0.00484362	Mpeg1
ENSMUSG00000097694	6.97518	2.47872	1.31651	-1.8828	0.0597269	0.206173	G730013B05Rik
ENSMUSG00000106837	28.3165	2.47648	0.935417	-2.64746	0.00810999	0.0452952	D630030B08Rik
ENSMUSG00000106157	3.47175	2.47607	1.51771	-1.63145	0.102795	0.298422	4930555A03Rik
ENSMUSG00000031465	32.6149	2.47282	0.897145	-2.75632	0.00584556	0.0348141	Angpt2
ENSMUSG00000042594	228.179	2.47273	0.628181	-3.93633	8.27384e-05	0.000981497	Sh2b3
ENSMUSG00000027808	11535.5	2.47214	0.545579	-4.53122	5.86452e-06	9.83842e-05	Serp1
ENSMUSG00000047945	1079.38	2.47015	0.84139	-2.93579	0.00332696	0.0220678	Marcksl1
ENSMUSG00000039208	136.315	2.46877	0.661409	-3.73259	0.000189524	0.00197806	Metrnl
ENSMUSG00000025314	747.89	2.46857	0.624909	-3.95029	7.80555e-05	0.000930089	Ptprj
ENSMUSG00000003206	1050.82	2.46814	0.585935	-4.21231	2.52775e-05	0.000352451	Ebi3
ENSMUSG00000045216	67.3155	2.46777	0.725608	-3.40097	0.000671466	0.00571927	Hs6st1
ENSMUSG00000095115	165	2.46729	0.784215	-3.14619	0.00165411	0.0121914	Itpripl2
ENSMUSG00000087150	203.609	2.4672	0.674894	-3.65569	0.000256496	0.00255202	BC064078
ENSMUSG00000000365	20.132	2.46638	1.00257	-2.46007	0.0138911	0.0694077	Rnf17
ENSMUSG00000019194	5.09931	2.46605	1.44191	-1.71027	0.0872156	0.267786	Scn1b
ENSMUSG00000005949	705.436	2.46338	0.560272	-4.39676	1.09878e-05	0.0001723	Ctns
ENSMUSG00000006435	6.42687	2.46298	1.31203	-1.87722	0.060488	0.208216	Neurl1a
ENSMUSG00000061119	1175.45	2.45826	0.562773	-4.36812	1.2532e-05	0.000193478	Prcp
ENSMUSG00000097177	6.40228	2.45723	1.30954	-1.87642	0.0605983	0.208551	9330159M07Rik
ENSMUSG00000027695	137.929	2.45633	0.624538	-3.93303	8.38819e-05	0.000990649	Pld1
ENSMUSG00000025498	15050.1	2.45437	0.6952	-3.53045	0.000414856	0.00382074	Irf7
ENSMUSG00000017002	273.407	2.45108	0.594449	-4.12328	3.73522e-05	0.000494901	Slpi
ENSMUSG00000030789	1621.62	2.44913	0.660014	-3.71073	0.000206661	0.00211953	Itgax
ENSMUSG00000090009	35.4852	2.4474	1.13389	-2.15841	0.0308958	0.127864	Gm16282
ENSMUSG00000059479	1194.52	2.44659	0.541876	-4.51503	6.33071e-06	0.000105704	B3gnt8
ENSMUSG00000004085	127.276	2.44339	0.637148	-3.83489	0.000125621	0.00139724	Zak
ENSMUSG00000036867	3.9171	2.44318	1.51477	-1.61291	0.106764	0.305678	Smad6
ENSMUSG00000009772	527.8	2.43869	0.738965	-3.30015	0.000966336	0.00778823	Nuak2
ENSMUSG00000032010	205.169	2.43597	0.780838	-3.11969	0.00181042	0.0131913	Usp2
ENSMUSG00000000732	283.411	2.43391	0.836411	-2.90995	0.00361491	0.0235574	Icosl
ENSMUSG00000027276	20.4796	2.43247	0.977454	-2.48858	0.0128255	0.0650391	Jag1
ENSMUSG00000017466	155.091	2.43205	0.713266	-3.40974	0.000650247	0.0055712	Timp2
ENSMUSG00000097750	189.687	2.43184	0.907535	-2.67961	0.00737073	0.0420632	Gm4673
ENSMUSG00000064344	3.78954	2.43075	1.51023	-1.60953	0.107501	0.307082	mt-Tm
ENSMUSG00000049285	56.7853	2.4305	0.728789	-3.33499	0.000853022	0.00701006	Mblac1
ENSMUSG00000107468	3.36878	2.4297	1.52329	-1.59503	0.110704	0.314256	5730507A11Rik
ENSMUSG00000018909	246.342	2.42915	0.736999	-3.296	0.000980726	0.00787884	Arrb1
ENSMUSG00000028550	376.479	2.42844	0.591146	-4.10802	3.99069e-05	0.000522254	Atg4c
ENSMUSG00000030541	596.513	2.42796	0.584205	-4.15601	3.23848e-05	0.000438911	Idh2
ENSMUSG00000031142	16.9087	2.42643	0.998048	-2.43118	0.0150498	0.0736317	Cacna1f
ENSMUSG00000058099	3672.44	2.42642	0.909533	-2.66776	0.00763577	0.0431748	Nfam1
ENSMUSG00000028795	432.381	2.42592	0.655763	-3.69938	0.000216128	0.00220109	Ccdc28b
ENSMUSG00000054404	284.172	2.42252	0.683636	-3.54358	0.00039474	0.00366079	Slfn5
ENSMUSG00000087206	14.7507	2.41971	1.11361	-2.17284	0.0297922	0.124625	Gm16175
ENSMUSG00000108511	16.6983	2.4193	1.19107	-2.0312	0.0422344	0.161104	RP23-133N24.2
ENSMUSG00000055538	115.271	2.41898	0.638903	-3.78615	0.000153	0.00165412	Zcchc24
ENSMUSG00000019998	2642.52	2.4189	0.566886	-4.267	1.9812e-05	0.000285976	Stx7
ENSMUSG00000106209	6.3396	2.41697	1.38025	-1.75111	0.0799273	0.251425	Gm42918
ENSMUSG00000050930	13.7545	2.41666	1.1313	-2.13618	0.0326648	0.133151	Map10
ENSMUSG00000103546	31.6059	2.41621	0.855587	-2.82404	0.00474231	0.0295428	Gm37666
ENSMUSG00000048445	14.6566	2.41532	1.06615	-2.26546	0.0234842	0.104179	Ccdc57
ENSMUSG00000090665	71.0915	2.41465	0.70966	-3.40255	0.00066761	0.00568946	Gad1-ps
ENSMUSG00000026821	177.55	2.41262	0.703862	-3.42768	0.000608756	0.00527798	Ralgds
ENSMUSG00000035004	7800.76	2.40768	0.696806	-3.45531	0.00054966	0.00484447	Igsf6
ENSMUSG00000022218	13.235	2.40732	1.09246	-2.20357	0.0275543	0.117599	Tgm1
ENSMUSG00000097142	146.164	2.40676	0.620303	-3.87998	0.000104467	0.00119405	Gm26778
ENSMUSG00000023960	188.294	2.40474	0.651464	-3.69128	0.00022313	0.00226374	Enpp5
ENSMUSG00000104114	12.1245	2.40129	1.24652	-1.92639	0.0540561	0.192289	Gm37297
ENSMUSG00000025792	364.795	2.39987	0.923151	-2.59965	0.00933201	0.0507198	Slc25a10
ENSMUSG00000102418	785.793	2.39984	0.638701	-3.75738	0.000171702	0.00182544	Sh2d1b1
ENSMUSG00000064936	8.93663	2.39984	1.21567	-1.97409	0.0483717	0.177978	Gm23722
ENSMUSG00000072770	34.2704	2.39961	0.852989	-2.81318	0.0049054	0.0304163	Acrbp
ENSMUSG00000056130	162.385	2.39814	0.709745	-3.37888	0.000727825	0.0061404	Ticam2
ENSMUSG00000046280	7.44973	2.39629	1.35975	-1.7623	0.078019	0.246865	She
ENSMUSG00000001348	6250.84	2.39513	0.587035	-4.08005	4.50256e-05	0.000579279	Acp5
ENSMUSG00000030339	194.366	2.39345	0.859118	-2.78593	0.00533738	0.0324775	Ltbr
ENSMUSG00000061544	30.9651	2.39333	0.943231	-2.53738	0.0111686	0.0584551	Zfp229
ENSMUSG00000100880	6.23663	2.39262	1.38432	-1.72837	0.0839221	0.260589	Gm6610
ENSMUSG00000020635	112.835	2.38875	0.68003	-3.51271	0.000443564	0.00406173	Fkbp1b
ENSMUSG00000085788	22.8507	2.38859	0.941578	-2.53679	0.0111873	0.0585335	4930470G03Rik
ENSMUSG00000016534	9601.96	2.38799	0.563027	-4.24135	2.2218e-05	0.000315014	Lamp2
ENSMUSG00000000693	580.835	2.38792	0.63739	-3.7464	0.00017939	0.00188993	Loxl3
ENSMUSG00000030096	5478.97	2.3818	0.697365	-3.41543	0.000636816	0.0054708	Slc6a6
ENSMUSG00000060591	13434.9	2.38146	0.628481	-3.78924	0.000151108	0.00163699	Ifitm2
ENSMUSG00000087435	12.9418	2.37834	1.13838	-2.08923	0.0366873	0.144854	Gm16323
ENSMUSG00000106104	5.50438	2.37805	1.42686	-1.66664	0.0955869	0.284535	Gm42660
ENSMUSG00000031015	1664.4	2.37766	0.636761	-3.734	0.000188462	0.00196942	Swap70
ENSMUSG00000036606	1844.51	2.37471	0.847004	-2.80366	0.0050526	0.031112	Plxnb2
ENSMUSG00000035392	627.668	2.37431	0.663766	-3.57703	0.000347518	0.00329164	Dennd1a
ENSMUSG00000085846	7.94685	2.37153	1.33692	-1.77388	0.0760828	0.24283	Gm15597
ENSMUSG00000035268	656.151	2.37132	0.569112	-4.1667	3.09046e-05	0.000420993	Pkig
ENSMUSG00000080814	7.32218	2.36858	1.36286	-1.73795	0.08222	0.257254	Gm12314
ENSMUSG00000000983	11.0853	2.36736	1.28369	-1.84418	0.0651568	0.218076	Wfdc18
ENSMUSG00000017412	89.3807	2.36421	0.667265	-3.54313	0.000395404	0.00366482	Cacnb4
ENSMUSG00000023951	4.71203	2.36042	1.45687	-1.6202	0.10519	0.302907	Vegfa
ENSMUSG00000001583	10.5574	2.35896	1.15745	-2.03807	0.0415426	0.159149	Tnk1
ENSMUSG00000020261	123.158	2.35341	0.786337	-2.99288	0.00276356	0.0188456	Slc36a1
ENSMUSG00000021007	24.7421	2.35285	0.961477	-2.44713	0.0144001	0.0712381	Spata7
ENSMUSG00000004508	260.397	2.35271	0.647031	-3.63617	0.000276723	0.00272275	Gab2
ENSMUSG00000083282	17.5112	2.35255	0.993811	-2.3672	0.0179234	0.0844581	Ctsf
ENSMUSG00000035547	87.5315	2.35179	0.958655	-2.45322	0.0141583	0.0704424	Capn5
ENSMUSG00000102037	365.09	2.34974	0.734619	-3.19859	0.00138103	0.0104883	Bcl2a1a
ENSMUSG00000103251	19.4299	2.34875	0.98413	-2.38663	0.0170038	0.0810571	Gm37519
ENSMUSG00000086894	21.4515	2.3479	0.928349	-2.52911	0.0114351	0.0595808	Gm15708
ENSMUSG00000097747	11.959	2.34556	1.13579	-2.06513	0.0389105	0.151513	Gm26534
ENSMUSG00000085505	131.087	2.34321	0.784237	-2.98789	0.00280914	0.019101	Gm12868
ENSMUSG00000079293	1149.83	2.34284	0.705522	-3.32071	0.000897885	0.00733127	Clec7a
ENSMUSG00000007613	747.258	2.34282	0.563244	-4.15951	3.18925e-05	0.000432974	Tgfbr1
ENSMUSG00000022971	1478.26	2.34271	0.546623	-4.28579	1.82093e-05	0.000267407	Ifnar2
ENSMUSG00000099757	5245.58	2.34181	0.637088	-3.67581	0.0002371	0.00238201	BE692007
ENSMUSG00000108526	51.0821	2.34053	0.902962	-2.59206	0.00954026	0.0515799	RP23-292C5.8
ENSMUSG00000017760	19482.2	2.33976	0.529336	-4.42018	9.86169e-06	0.000156329	Ctsa
ENSMUSG00000033777	2788.5	2.33964	0.630567	-3.71038	0.000206947	0.00211975	Tlr13
ENSMUSG00000021375	42.4261	2.33939	0.852177	-2.74519	0.00604751	0.0357371	Kif13a
ENSMUSG00000026546	11.2896	2.33684	1.17144	-1.99484	0.0460606	0.171363	Cfap45
ENSMUSG00000005237	20.9006	2.33085	0.967188	-2.40992	0.015956	0.0770506	Dnah2
ENSMUSG00000015829	4.58448	2.33017	1.45648	-1.59986	0.10963	0.311805	Tnr
ENSMUSG00000024232	49.2756	2.32871	0.847235	-2.7486	0.00598506	0.0355048	Bambi
ENSMUSG00000031555	1296.42	2.32797	0.568962	-4.09161	4.28392e-05	0.000554273	Adam9
ENSMUSG00000061143	57.1919	2.32599	0.842503	-2.76081	0.00576583	0.0344052	Maml3
ENSMUSG00000003752	46.1436	2.32493	0.794847	-2.92501	0.00344449	0.0226873	Itpkc
ENSMUSG00000029616	2199.59	2.32237	0.548661	-4.2328	2.30796e-05	0.000326033	Erp29
ENSMUSG00000041654	548.382	2.32074	0.713217	-3.2539	0.00113832	0.00896023	Slc39a11
ENSMUSG00000079020	149.984	2.31955	0.627261	-3.6979	0.000217391	0.00221254	Slc45a4
ENSMUSG00000108064	21.138	2.31902	0.950973	-2.43858	0.0147451	0.0724739	Gm44423
ENSMUSG00000045952	37.4219	2.3175	0.921198	-2.51574	0.0118781	0.0613448	Gm5548
ENSMUSG00000017144	760.536	2.31737	0.575998	-4.02322	5.74079e-05	0.000714424	Rnd3
ENSMUSG00000010342	44.0836	2.31659	0.849726	-2.72628	0.00640527	0.0373313	Tex14
ENSMUSG00000109491	1189.34	2.31333	0.543266	-4.25819	2.06091e-05	0.000295348	Gm15396
ENSMUSG00000058728	15.4337	2.31313	1.0207	-2.26621	0.0234388	0.104036	Cd300c
ENSMUSG00000101903	11.4867	2.31292	1.25836	-1.83804	0.0660568	0.219862	Gm29291
ENSMUSG00000024187	1262.71	2.31094	0.906692	-2.54876	0.0108106	0.0570484	Fam234a
ENSMUSG00000105504	723.273	2.30924	0.56364	-4.09701	4.1852e-05	0.000542819	Gbp5
ENSMUSG00000033685	13710.3	2.30826	0.633347	-3.64454	0.000267868	0.00265032	Ucp2
ENSMUSG00000095609	54.6286	2.30812	0.927256	-2.4892	0.0128031	0.0650082	Gm21188
ENSMUSG00000022788	565.845	2.30712	0.636581	-3.62424	0.000289814	0.00282547	Fgd4
ENSMUSG00000006301	666.696	2.30687	0.919523	-2.50877	0.0121152	0.0622937	Tmbim1
ENSMUSG00000069830	4.5196	2.30673	1.40843	-1.6378	0.101463	0.295887	Nlrp1a
ENSMUSG00000022453	1391.45	2.30485	0.549086	-4.1976	2.69756e-05	0.00037191	Naga
ENSMUSG00000024897	27.8906	2.30468	0.945817	-2.43671	0.0148215	0.0727691	Apba1
ENSMUSG00000024589	88.7622	2.30361	0.754291	-3.05401	0.00225803	0.0159275	Nedd4l
ENSMUSG00000047139	9.85693	2.30254	1.16098	-1.98328	0.0473364	0.175049	Cd24a
ENSMUSG00000001751	619.461	2.30243	0.863744	-2.66564	0.00768416	0.0434023	Naglu
ENSMUSG00000065389	69.8151	2.30221	0.788265	-2.92061	0.00349352	0.0229253	Gm23100
ENSMUSG00000082100	170.426	2.30183	0.654875	-3.51491	0.000439901	0.00403743	Glns-ps1
ENSMUSG00000104523	27.9777	2.30145	0.871328	-2.64132	0.00825847	0.045852	Gm37335
ENSMUSG00000071042	4.59798	2.2982	1.4173	-1.62154	0.104902	0.302514	Rasgrp3
ENSMUSG00000023044	96.193	2.29809	0.738385	-3.11231	0.00185628	0.0134825	Csad
ENSMUSG00000034738	202.667	2.29715	0.65713	-3.49573	0.000472769	0.0042801	Nostrin
ENSMUSG00000036362	539.823	2.29554	0.613734	-3.74029	0.000183808	0.00192974	P2ry13
ENSMUSG00000040365	136.192	2.28916	0.77143	-2.96742	0.00300311	0.020239	Trim41
ENSMUSG00000010051	33.8837	2.28809	0.816936	-2.80082	0.0050973	0.031363	Hyal1
ENSMUSG00000048677	377.011	2.28709	1.1387	-2.0085	0.0445898	0.167332	Tpcn2
ENSMUSG00000041673	10.4433	2.28652	1.15852	-1.97366	0.0484208	0.178087	Lrrc18
ENSMUSG00000068631	358.233	2.2857	0.676032	-3.38105	0.000722091	0.00609524	Gm7676
ENSMUSG00000032501	676.934	2.28426	0.769916	-2.9669	0.00300819	0.0202585	Trib1
ENSMUSG00000037493	54.4891	2.28411	0.78823	-2.89777	0.00375822	0.0242833	Cib2
ENSMUSG00000070960	181.652	2.28388	0.775181	-2.94626	0.00321646	0.0214417	Gm19680
ENSMUSG00000087633	49.0925	2.27834	0.830728	-2.74258	0.00609584	0.0359563	Gm14455
ENSMUSG00000085725	8.69722	2.27788	1.33258	-1.70938	0.0873807	0.268098	Gm15873
ENSMUSG00000039782	73.9412	2.27749	0.717707	-3.17329	0.00150722	0.0112647	Cpeb2
ENSMUSG00000033540	860.342	2.27739	0.914834	-2.4894	0.0127958	0.0649916	Idua
ENSMUSG00000001604	59.2627	2.27708	0.732236	-3.10977	0.00187236	0.0135869	Tcea3
ENSMUSG00000037095	263.826	2.27649	0.677894	-3.35818	0.000784579	0.00653442	Lrg1
ENSMUSG00000019978	900.698	2.27436	0.629894	-3.6107	0.000305368	0.00295368	Epb41l2
ENSMUSG00000029484	369.934	2.27228	0.638355	-3.55959	0.00037143	0.00348918	Anxa3
ENSMUSG00000097573	5.77558	2.27201	1.40201	-1.62054	0.105117	0.302873	G730003C15Rik
ENSMUSG00000104347	5.77558	2.27201	1.40201	-1.62054	0.105117	0.302873	Gm37689
ENSMUSG00000070392	4.41664	2.271	1.41485	-1.60511	0.10847	0.309341	Gm20634
ENSMUSG00000097026	410.537	2.26941	0.583663	-3.88823	0.000100978	0.00115998	Gm26786
ENSMUSG00000013707	2895.35	2.26887	0.576924	-3.9327	8.39969e-05	0.000991275	Tnfaip8l2
ENSMUSG00000079445	13.3875	2.26542	1.14522	-1.97816	0.0479109	0.176828	B3gnt7
ENSMUSG00000051343	139.181	2.26468	1.03371	-2.19083	0.0284639	0.120197	Rab11fip5
ENSMUSG00000048031	240.672	2.2645	0.660273	-3.42965	0.00060437	0.00525707	Fcrl5
ENSMUSG00000027366	3150.97	2.2637	0.631451	-3.58492	0.000337183	0.00320705	Sppl2a
ENSMUSG00000085287	19.0898	2.26131	1.18146	-1.914	0.0556207	0.196325	4833418N02Rik
ENSMUSG00000002109	1487.2	2.2594	0.538877	-4.19279	2.75547e-05	0.000378587	Ddb2
ENSMUSG00000024401	483.754	2.25938	0.557241	-4.05458	5.0224e-05	0.000637433	Tnf
ENSMUSG00000028189	282.373	2.25916	0.590309	-3.82708	0.00012967	0.00143386	Ctbs
ENSMUSG00000087331	14.6862	2.25757	1.12962	-1.99851	0.0456609	0.170351	1810021B22Rik
ENSMUSG00000075595	2004.02	2.25551	0.825302	-2.73295	0.00627706	0.0367714	Zfp652
ENSMUSG00000093577	17.6929	2.25456	1.02852	-2.19204	0.0283764	0.120018	Gm20632
ENSMUSG00000046794	149.873	2.25353	0.623156	-3.61632	0.000298824	0.00290444	Ppp1r3b
ENSMUSG00000019087	9867.98	2.25321	0.533795	-4.22112	2.43096e-05	0.000341639	Atp6ap1
ENSMUSG00000087052	29.5221	2.25213	0.936661	-2.40442	0.0161982	0.078008	Gm8093
ENSMUSG00000093858	19.3964	2.25067	0.969046	-2.32257	0.0202024	0.0928159	Gm19967
ENSMUSG00000025017	6146.68	2.2495	0.804977	-2.79449	0.00519818	0.0318733	Pik3ap1
ENSMUSG00000018167	1162.77	2.24347	0.861791	-2.60326	0.00923412	0.0503142	Stard3
ENSMUSG00000093553	6.99128	2.2429	1.35936	-1.64997	0.0989492	0.290966	Gm20633
ENSMUSG00000002602	3137.71	2.2414	0.860586	-2.60451	0.00920057	0.050188	Axl
ENSMUSG00000018398	20.7488	2.2403	0.973956	-2.30021	0.0214363	0.097282	2008-09-01
ENSMUSG00000105962	6.83654	2.24028	1.38636	-1.61594	0.106107	0.304621	Gm42432
ENSMUSG00000030329	14.7778	2.2366	1.09379	-2.04481	0.0408733	0.157112	Pianp
ENSMUSG00000103284	9.71368	2.23633	1.15908	-1.92939	0.0536819	0.191641	3110080O07Rik
ENSMUSG00000021665	6608.87	2.23578	0.582537	-3.838	0.000124042	0.00138316	Hexb
ENSMUSG00000029428	124.936	2.23342	0.648235	-3.44539	0.000570228	0.00499544	Stx2
ENSMUSG00000030545	44.4473	2.2334	0.799555	-2.79331	0.00521724	0.0319656	Pex11a
ENSMUSG00000038421	18.8849	2.23187	1.21528	-1.83651	0.0662823	0.220411	Fcrla
ENSMUSG00000074063	110.325	2.23119	0.961993	-2.31934	0.0203763	0.0934271	Osgin1
ENSMUSG00000022574	111.611	2.22908	0.760452	-2.93126	0.00337586	0.0223274	Naprt
ENSMUSG00000018927	6842.94	2.22734	0.73396	-3.03469	0.00240779	0.0168156	Ccl6
ENSMUSG00000068551	164.365	2.22427	0.645858	-3.44389	0.000573403	0.00501775	Zfp467
ENSMUSG00000086373	5.52936	2.22308	1.35207	-1.6442	0.100135	0.292827	Gm11978
ENSMUSG00000044080	583.678	2.22294	0.755524	-2.94225	0.00325834	0.0216937	S100a1
ENSMUSG00000085184	5.58315	2.22257	1.35109	-1.64502	0.0999662	0.292619	4933439K11Rik
ENSMUSG00000108388	4.63365	2.22255	1.50234	-1.47939	0.139037	0.366128	RP23-172P1.1
ENSMUSG00000062310	7.43443	2.22089	1.28332	-1.73058	0.0835269	0.259858	Glrp1
ENSMUSG00000036622	502.694	2.21994	0.828134	-2.68065	0.00734788	0.0419778	Atp13a2
ENSMUSG00000026853	361.369	2.21789	0.799501	-2.7741	0.00553553	0.033454	Crat
ENSMUSG00000033207	15.156	2.21379	1.13672	-1.94753	0.0514711	0.185824	Mamdc2
ENSMUSG00000051314	24.5548	2.2135	0.906631	-2.44146	0.014628	0.0720648	Ffar2
ENSMUSG00000020284	296.866	2.21348	0.578763	-3.8245	0.00013104	0.00144706	1810043G02Rik
ENSMUSG00000053477	1241.68	2.21342	0.563201	-3.93006	8.49232e-05	0.000999991	Tcf4
ENSMUSG00000097004	122.719	2.21302	1.0542	-2.09924	0.0357959	0.14239	4731419I09Rik
ENSMUSG00000029009	424.98	2.21178	0.989612	-2.235	0.0254177	0.110758	Mthfr
ENSMUSG00000020097	3685.25	2.20824	0.728725	-3.03028	0.0024433	0.0170041	Sgpl1
ENSMUSG00000045968	159.873	2.20788	0.656829	-3.36142	0.000775432	0.00647368	Teddm2
ENSMUSG00000013698	4720.82	2.20624	0.573603	-3.84628	0.000119925	0.00134661	Pea15a
ENSMUSG00000038175	924.353	2.20617	0.553513	-3.98576	6.72652e-05	0.000817984	Mylip
ENSMUSG00000073650	8.91874	2.20513	1.23587	-1.78427	0.0743793	0.239618	Catip
ENSMUSG00000086929	27.75	2.20346	1.05181	-2.09492	0.0361785	0.143448	Gm11788
ENSMUSG00000024675	8769.54	2.20265	0.768086	-2.86771	0.00413448	0.0263384	Ms4a4c
ENSMUSG00000022103	8.104	2.20225	1.33029	-1.65547	0.0978288	0.289001	Gfra2
ENSMUSG00000029426	1897.08	2.20114	0.597025	-3.68684	0.000227053	0.00229916	Scarb2
ENSMUSG00000034616	659.211	2.20101	0.837597	-2.62777	0.00859467	0.0474384	Ssh3
ENSMUSG00000048897	316.663	2.20063	0.662619	-3.32111	0.000896603	0.00732455	Zfp710
ENSMUSG00000056666	158.926	2.20011	0.636247	-3.45795	0.0005443	0.00481049	Retsat
ENSMUSG00000105586	21.0332	2.19738	0.941486	-2.33395	0.0195984	0.0908774	Gm43009
ENSMUSG00000086784	5.62344	2.19724	1.42252	-1.5446	0.122442	0.336517	Isoc2a
ENSMUSG00000010609	1748.07	2.1967	0.588629	-3.7319	0.000190041	0.00198207	Psen2
ENSMUSG00000027007	276.906	2.19471	0.585454	-3.74873	0.000177731	0.00187704	Ssfa2
ENSMUSG00000030447	5991.11	2.19465	0.53455	-4.1056	4.03258e-05	0.000525584	Cyfip1
ENSMUSG00000055061	112.341	2.19285	0.889016	-2.4666	0.0136402	0.0683895	4931431C16Rik
ENSMUSG00000103103	31.2448	2.19171	0.894654	-2.44979	0.0142939	0.0709106	4833445I07Rik
ENSMUSG00000007038	1259.8	2.18597	0.640957	-3.41048	0.000648479	0.00555904	Neu1
ENSMUSG00000023186	1929.66	2.18452	0.622942	-3.50678	0.000453566	0.00413436	Vwa5a
ENSMUSG00000031007	3881.61	2.18435	0.61083	-3.57603	0.000348847	0.00330031	Atp6ap2
ENSMUSG00000040564	10.9429	2.18358	1.13213	-1.92874	0.0537633	0.191791	Apoc1
ENSMUSG00000030760	1664.36	2.18327	0.622832	-3.5054	0.000455923	0.00415348	Acer3
ENSMUSG00000018500	173.798	2.18287	0.615685	-3.54542	0.000391982	0.00363944	Adora2b
ENSMUSG00000021947	151.352	2.18192	0.62968	-3.46513	0.000529985	0.00470661	Cryl1
ENSMUSG00000062300	115.54	2.1805	1.55749	-1.40001	0.16151	0.405335	Pvrl2
ENSMUSG00000081121	33.6157	2.17925	0.823974	-2.6448	0.00817387	0.0455882	Gm12791
ENSMUSG00000036534	619.216	2.17835	0.854828	-2.54829	0.0108252	0.0570691	Slc38a7
ENSMUSG00000078945	600.27	2.1743	0.560756	-3.87743	0.000105564	0.00120486	Naip2
ENSMUSG00000000359	7.78402	2.1742	1.25291	-1.73532	0.0826843	0.258302	Rem1
ENSMUSG00000025856	20.1038	2.17398	1.03286	-2.10481	0.0353078	0.14107	Pdgfa
ENSMUSG00000097364	13.7976	2.17304	1.08008	-2.01192	0.0442281	0.166327	Gm26719
ENSMUSG00000024330	4.20181	2.17284	1.47951	-1.46862	0.141936	0.371195	Col11a2
ENSMUSG00000048027	35.2903	2.17253	0.822499	-2.64138	0.00825689	0.045852	Rgmb
ENSMUSG00000039512	86.2341	2.17223	0.682788	-3.18141	0.00146559	0.0110079	Uhrf1bp1
ENSMUSG00000028019	68.7724	2.17201	0.753368	-2.88306	0.0039383	0.0253138	Pdgfc
ENSMUSG00000027360	134.679	2.16911	0.685634	-3.16365	0.00155802	0.011601	Hdc
ENSMUSG00000000134	1070.53	2.16713	0.85908	-2.52262	0.0116484	0.0603536	Tfe3
ENSMUSG00000047409	19.8247	2.16039	0.965051	-2.23863	0.0251799	0.109902	Ctdspl
ENSMUSG00000103730	1156.15	2.15986	0.633829	-3.40764	0.00065527	0.00560222	Gm38316
ENSMUSG00000108825	11.8003	2.15858	1.28301	-1.68244	0.0924838	0.277729	RP24-252B21.3
ENSMUSG00000037375	23.154	2.15611	0.973146	-2.21561	0.0267181	0.114828	Hhat
ENSMUSG00000081052	14.8612	2.15435	1.07114	-2.01126	0.0442979	0.166432	Gm6305
ENSMUSG00000015202	18.7811	2.15276	1.01874	-2.11317	0.0345866	0.13908	Cnksr3
ENSMUSG00000097090	39.9858	2.15197	0.808363	-2.66214	0.00776465	0.0437147	Gm26724
ENSMUSG00000000594	11556.1	2.15192	0.54676	-3.93576	8.29325e-05	0.00098307	Gm2a
ENSMUSG00000031728	155.105	2.15052	0.631031	-3.40794	0.000654546	0.00559903	Zfp821
ENSMUSG00000104339	91.104	2.14843	0.80647	-2.66399	0.00772194	0.0435239	C130089K02Rik
ENSMUSG00000058881	75.1161	2.1456	0.754864	-2.84236	0.00447805	0.0281269	Zfp516
ENSMUSG00000029705	1182.54	2.14381	0.595369	-3.60081	0.000317228	0.00305544	Cux1
ENSMUSG00000077704	7.10094	2.14317	1.29855	-1.65044	0.0988533	0.290811	Snord89
ENSMUSG00000002204	3346.66	2.14221	0.538741	-3.97633	6.99879e-05	0.000846583	Napsa
ENSMUSG00000005107	51.9686	2.13826	0.866398	-2.46798	0.0135876	0.06819	Slc2a9
ENSMUSG00000033880	17784.7	2.13727	0.587651	-3.63696	0.00027587	0.00271771	Lgals3bp
ENSMUSG00000057990	19.6731	2.1362	1.23552	-1.72899	0.0838104	0.260344	E030024N20Rik
ENSMUSG00000091412	19.3612	2.1361	1.04255	-2.04892	0.0404703	0.156051	Gm2895
ENSMUSG00000027698	1226.92	2.13584	0.55748	-3.83124	0.000127498	0.00141479	Nceh1
ENSMUSG00000019461	333.711	2.13384	0.654522	-3.26014	0.00111356	0.0087887	Plscr3
ENSMUSG00000020857	19.9455	2.13365	0.952077	-2.24104	0.0250233	0.109308	Nme2
ENSMUSG00000032245	212.684	2.13343	0.708738	-3.01018	0.00261095	0.0179752	Cln6
ENSMUSG00000027775	3532.97	2.13254	0.533022	-4.00084	6.31176e-05	0.00077462	Mfsd1
ENSMUSG00000029802	188.276	2.13194	0.744666	-2.86295	0.0041972	0.0266562	Abcg2
ENSMUSG00000105995	5.24966	2.1317	1.36251	-1.56455	0.117689	0.328137	Gm43554
ENSMUSG00000106755	389.786	2.12964	0.586673	-3.63003	0.000283386	0.00277975	Tpi-rs11
ENSMUSG00000021871	3042.98	2.12813	0.60669	-3.50777	0.000451882	0.00412371	Pnp
ENSMUSG00000040189	14.5925	2.12752	1.12177	-1.89658	0.0578834	0.201639	Ccdc114
ENSMUSG00000087347	4.02046	2.12701	1.4841	-1.4332	0.151799	0.388407	1700047K16Rik
ENSMUSG00000029452	245.552	2.1261	0.629588	-3.37697	0.000732887	0.00617984	Tmem116
ENSMUSG00000026544	74.4049	2.12531	0.746073	-2.84865	0.00439045	0.0276964	Dusp23
ENSMUSG00000058624	300.319	2.12463	0.576486	-3.68548	0.000228272	0.00230858	Gda
ENSMUSG00000102155	45.1191	2.1242	0.768942	-2.7625	0.00573611	0.0342772	Gm37468
ENSMUSG00000037341	160.56	2.12198	0.684503	-3.10003	0.001935	0.0139465	Slc9a7
ENSMUSG00000092267	39.4908	2.12185	0.791822	-2.6797	0.00736885	0.0420632	Gm20417
ENSMUSG00000038831	65.37	2.12093	0.715001	-2.96633	0.00301377	0.0202852	Ralgps1
ENSMUSG00000003518	499.322	2.11914	0.593443	-3.57092	0.000355723	0.00335543	Dusp3
ENSMUSG00000040964	337.878	2.11834	0.915166	-2.3147	0.0206292	0.0943158	Arhgef10l
ENSMUSG00000020277	2812.86	2.11801	0.586048	-3.61405	0.000301445	0.00292814	Pfkl
ENSMUSG00000039735	61.3179	2.11723	0.716283	-2.95586	0.00311803	0.0208814	Fnbp1l
ENSMUSG00000100081	207.825	2.1165	0.817416	-2.58926	0.00961814	0.0519042	Gm29434
ENSMUSG00000108368	44.8666	2.11232	0.757907	-2.78705	0.00531908	0.0324155	RP23-335C3.10
ENSMUSG00000024799	95.5614	2.11178	0.653963	-3.2292	0.00124136	0.00963367	Tm7sf2
ENSMUSG00000030826	150.837	2.11011	0.749666	-2.81473	0.0048818	0.0302937	Bcat2
ENSMUSG00000102856	26.006	2.10886	0.899405	-2.34473	0.0190407	0.0888587	Gm37084
ENSMUSG00000001995	58.1642	2.10656	0.802376	-2.6254	0.00865483	0.0476881	Sipa1l2
ENSMUSG00000034641	5709.9	2.10432	0.703765	-2.99009	0.00278897	0.0189799	Cd300ld
ENSMUSG00000030970	227.923	2.10312	0.702534	-2.99362	0.00275691	0.0188259	Ctbp2
ENSMUSG00000081958	3.95559	2.10266	1.43631	-1.46393	0.143212	0.373554	Gm11594
ENSMUSG00000036553	159.075	2.10258	0.972813	-2.16134	0.0306689	0.127222	Sh3tc1
ENSMUSG00000040751	4765.02	2.1025	0.594321	-3.53764	0.000403718	0.00373107	Lat2
ENSMUSG00000029162	231.252	2.10165	0.589803	-3.5633	0.000366216	0.00344425	Khk
ENSMUSG00000019916	1565.82	2.10056	0.540574	-3.88579	0.000101997	0.00116749	P4ha1
ENSMUSG00000032788	663.106	2.10041	0.671949	-3.12585	0.00177292	0.0129477	Pdxk
ENSMUSG00000046245	2965.76	2.09378	0.637332	-3.28523	0.00101901	0.0081373	Pilra
ENSMUSG00000022575	1894.29	2.0924	0.535811	-3.90511	9.41835e-05	0.00108897	Gsdmd
ENSMUSG00000070476	43.4344	2.09221	0.812867	-2.57386	0.0100571	0.0537467	Fam217b
ENSMUSG00000025911	5.18698	2.0906	1.4321	-1.45982	0.14434	0.375453	Adhfe1
ENSMUSG00000047671	36.8115	2.08881	0.798571	-2.61568	0.00890503	0.0487808	Tctex1d4
ENSMUSG00000034951	458.908	2.08879	0.58493	-3.57102	0.000355597	0.00335543	Cog7
ENSMUSG00000032046	2320.71	2.08726	0.645934	-3.23138	0.00123193	0.00956509	Abhd12
ENSMUSG00000038195	43.7517	2.08647	0.763253	-2.73365	0.00626365	0.0367291	Rilp
ENSMUSG00000061778	550.621	2.08554	0.581177	-3.58847	0.000332628	0.00317317	Mospd2
ENSMUSG00000106739	13.8535	2.08397	1.07805	-1.93309	0.053225	0.190264	Gm43499
ENSMUSG00000049580	3.89291	2.08272	1.48712	-1.4005	0.161364	0.405223	Tsku
ENSMUSG00000046826	27.8377	2.08162	0.855198	-2.43408	0.0149295	0.0732001	Fam187b
ENSMUSG00000062232	289.7	2.07812	0.588512	-3.53114	0.000413778	0.00381301	Rapgef2
ENSMUSG00000024177	32.0382	2.07783	0.82354	-2.52305	0.0116342	0.0602992	Nme4
ENSMUSG00000044583	1039.14	2.07683	0.654987	-3.1708	0.00152019	0.0113404	Tlr7
ENSMUSG00000106427	13.0031	2.07627	1.09404	-1.8978	0.0577226	0.201298	Gm42820
ENSMUSG00000042099	160.189	2.07406	0.642642	-3.22739	0.00124923	0.00967127	Kank3
ENSMUSG00000101872	5.0929	2.0737	1.38746	-1.4946	0.135019	0.3591	Gm29237
ENSMUSG00000029299	1076.84	2.07236	0.556927	-3.72106	0.000198385	0.0020571	Abcg3
ENSMUSG00000017747	85.8776	2.07234	0.824558	-2.51327	0.0119618	0.061717	Ghdc
ENSMUSG00000079227	7835.45	2.07145	0.545396	-3.79806	0.000145831	0.00158304	Ccr5
ENSMUSG00000031847	43.4166	2.07142	0.825719	-2.50862	0.0121204	0.0622937	1700030J22Rik
ENSMUSG00000023923	454.78	2.07133	0.647841	-3.19728	0.00138731	0.010516	Tbc1d5
ENSMUSG00000027900	2048.62	2.07129	0.597818	-3.46475	0.00053072	0.0047087	Dram2
ENSMUSG00000023456	4142.46	2.07064	0.573448	-3.61086	0.000305188	0.00295368	Tpi1
ENSMUSG00000005681	14.3119	2.06923	1.18129	-1.75168	0.079829	0.251248	Apoa2
ENSMUSG00000028874	3176.81	2.06601	0.595536	-3.46916	0.000522087	0.00465538	Fgr
ENSMUSG00000059866	714.849	2.06469	0.560767	-3.68191	0.000231497	0.00233528	Tnip2
ENSMUSG00000005142	7746.13	2.06289	0.778459	-2.64997	0.00804996	0.0450386	Man2b1
ENSMUSG00000026425	1676.1	2.06231	0.687775	-2.99852	0.00271295	0.0185893	Srgap2
ENSMUSG00000053684	30.5893	2.06137	0.844218	-2.44174	0.0146165	0.0720632	BC048403
ENSMUSG00000024197	1413.41	2.06097	0.539298	-3.82158	0.000132601	0.00146126	Plin3
ENSMUSG00000023915	469.681	2.06078	0.903867	-2.27996	0.0226103	0.10106	Tnfrsf21
ENSMUSG00000028385	127.74	2.05975	0.6912	-2.97996	0.00288283	0.0195355	Snx30
ENSMUSG00000032041	348.952	2.05965	0.572365	-3.5985	0.00032006	0.00307699	Tirap
ENSMUSG00000104262	8.33273	2.05873	1.23299	-1.6697	0.0949778	0.283091	Gm37747
ENSMUSG00000097081	62.3955	2.05763	0.853642	-2.41041	0.0159345	0.0769916	Gm10425
ENSMUSG00000021886	4062.54	2.05731	0.611472	-3.36451	0.000766791	0.00640824	Gpr65
ENSMUSG00000032691	207.116	2.05696	1.57608	-1.30511	0.191854	0.4514	Nlrp3
ENSMUSG00000017830	1957.9	2.05675	0.62898	-3.26998	0.00107556	0.00853483	Dhx58
ENSMUSG00000102324	6.22133	2.05607	1.39286	-1.47615	0.139903	0.367743	Gm19721
ENSMUSG00000038332	1365.38	2.05514	0.566927	-3.62505	0.000288911	0.00281924	Sesn1
ENSMUSG00000069835	9.10898	2.05492	1.33205	-1.54267	0.12291	0.337165	Sat2
ENSMUSG00000031399	513.388	2.05186	0.71428	-2.87262	0.00407082	0.0259983	Fam3a
ENSMUSG00000062545	344.947	2.05158	1.58358	-1.29553	0.195137	0.456127	Tlr12
ENSMUSG00000046959	44.7038	2.04901	1.05118	-1.94925	0.051265	0.185289	Slc26a1
ENSMUSG00000037185	511.852	2.04885	0.848263	-2.41534	0.0157204	0.0762358	Krt80
ENSMUSG00000022951	212.83	2.04648	0.642376	-3.1858	0.00144355	0.0108804	Rcan1
ENSMUSG00000048440	785.135	2.04539	0.549822	-3.72009	0.000199148	0.00206234	Cyp4f16
ENSMUSG00000059923	690.005	2.04504	0.557726	-3.66675	0.00024565	0.00245634	Grb2
ENSMUSG00000017664	1593.38	2.04376	0.794962	-2.57089	0.0101436	0.0541186	Slc35c2
ENSMUSG00000050335	17878.8	2.04324	0.541782	-3.77132	0.000162384	0.0017391	Lgals3
ENSMUSG00000066684	555.171	2.04256	0.587549	-3.47641	0.000508171	0.00454404	Pilrb1
ENSMUSG00000028793	309.14	2.04235	0.746144	-2.73721	0.00619629	0.0364411	Rnf19b
ENSMUSG00000006800	314.838	2.04234	0.610695	-3.34429	0.000824936	0.00681537	Sulf2
ENSMUSG00000045039	36.6368	2.04225	1.15132	-1.77384	0.0760904	0.24283	Megf8
ENSMUSG00000001089	403.814	2.04168	0.595244	-3.42999	0.000603597	0.0052532	Luzp1
ENSMUSG00000045382	6.10728	2.0409	1.32559	-1.53962	0.123653	0.338562	Cxcr4
ENSMUSG00000108234	6.14036	2.0371	1.4337	-1.42086	0.155357	0.394791	Gm44428
ENSMUSG00000092134	41.4817	2.03475	0.782462	-2.60045	0.00931029	0.0506362	Gm17089
ENSMUSG00000050394	5.15778	2.0341	1.46436	-1.38907	0.164812	0.410913	Armcx6
ENSMUSG00000003559	208.211	2.03243	0.661946	-3.07038	0.00213784	0.0152366	As3mt
ENSMUSG00000037405	1882.03	2.03141	0.559776	-3.62897	0.000284552	0.00278741	Icam1
ENSMUSG00000102923	9.42976	2.03085	1.18398	-1.71528	0.0862939	0.265784	Gm31728
ENSMUSG00000103869	25.6911	2.02635	0.871957	-2.32391	0.0201306	0.0925926	Gm37420
ENSMUSG00000086606	12.1387	2.02542	1.13221	-1.78892	0.073628	0.237725	Gm13205
ENSMUSG00000040432	3.76535	2.02532	1.49461	-1.35508	0.175391	0.426571	Ltb4r2
ENSMUSG00000103734	3.76535	2.02532	1.49461	-1.35508	0.175391	0.426571	Gm37651
ENSMUSG00000021280	56.1794	2.02518	0.797056	-2.54082	0.0110592	0.0580158	Exoc3l4
ENSMUSG00000062078	1564.99	2.02362	0.800624	-2.52755	0.011486	0.0597165	Qk
ENSMUSG00000099583	10.2602	2.02284	1.166	-1.73485	0.0827671	0.258475	Hist1h3d
ENSMUSG00000106820	7.65427	2.02167	1.2581	-1.60693	0.10807	0.308366	D5Ertd605e
ENSMUSG00000025612	763.753	2.02047	0.815207	-2.47848	0.0131944	0.066551	Bach1
ENSMUSG00000103439	126.76	2.02005	0.626846	-3.22257	0.00127047	0.00981699	Gm7019
ENSMUSG00000027994	1931.43	2.01907	0.682688	-2.95752	0.00310121	0.0207862	Ccdc109b
ENSMUSG00000103199	47.9081	2.01807	0.802946	-2.51333	0.0119598	0.061717	Gm37648
ENSMUSG00000025154	1152.48	2.01673	0.633277	-3.1846	0.00144956	0.0109176	Arhgap19
ENSMUSG00000035356	1639.03	2.01602	0.633701	-3.18135	0.00146591	0.0110079	Nfkbiz
ENSMUSG00000022219	19.8161	2.0146	0.936736	-2.15066	0.0315032	0.129606	Cideb
ENSMUSG00000046223	264.5	2.01399	0.584357	-3.4465	0.000567896	0.00498047	Plaur
ENSMUSG00000034758	38.6907	2.01047	0.832144	-2.41601	0.0156917	0.0761426	Tle6
ENSMUSG00000060090	1079.76	2.01039	0.542366	-3.70671	0.000209969	0.00214657	Rp2
ENSMUSG00000038352	430.856	2.00952	0.765881	-2.6238	0.00869546	0.0478869	Arl5c
ENSMUSG00000109429	337.612	2.00951	0.605068	-3.32113	0.000896551	0.00732455	RP24-344N22.3
ENSMUSG00000028692	10390.1	2.00913	0.532202	-3.77513	0.000159922	0.00171388	Akr1a1
ENSMUSG00000106558	233.639	2.00876	0.771645	-2.60322	0.00923534	0.0503142	Gm5552
ENSMUSG00000039908	236.095	2.00835	0.790748	-2.53981	0.0110914	0.0581459	Slc26a11
ENSMUSG00000025169	111.09	2.00759	0.640766	-3.13311	0.00172963	0.0126721	Ogfod3
ENSMUSG00000023143	1069.56	2.00736	0.851847	-2.35648	0.0184493	0.0865536	Nagpa
ENSMUSG00000090124	556.786	2.0053	0.634439	-3.16074	0.00157371	0.0116911	Ugt1a7c
ENSMUSG00000031444	333.658	2.00396	0.584902	-3.42615	0.000612212	0.00529358	F10
ENSMUSG00000017309	20.1344	2.00366	1.04922	-1.90967	0.0561752	0.197758	Cd300lg
ENSMUSG00000101778	36.8803	2.00264	0.90269	-2.21853	0.0265188	0.114155	Gm29488
ENSMUSG00000100813	6.98948	2.00065	1.28111	-1.56165	0.11837	0.3292	Gm28874
ENSMUSG00000028708	1073.38	2.00018	0.761429	-2.62688	0.00861718	0.0475298	Mknk1
ENSMUSG00000045636	638.573	1.99764	0.594672	-3.35923	0.000781605	0.00651841	Mtus1
ENSMUSG00000097060	60.5941	1.9976	0.77039	-2.59297	0.00951519	0.051506	Gm26759
ENSMUSG00000021752	24.3452	1.99755	0.922558	-2.16523	0.03037	0.126441	Kctd6
ENSMUSG00000042724	13.5899	1.9974	1.05895	-1.8862	0.0592686	0.204857	Map3k9
ENSMUSG00000074657	12.7412	1.99131	1.07943	-1.84478	0.0650702	0.217887	Kif5a
ENSMUSG00000051319	151.809	1.99047	0.832197	-2.39182	0.0167651	0.0801587	1500011K16Rik
ENSMUSG00000040249	1157.13	1.98934	0.816339	-2.4369	0.0148136	0.0727658	Lrp1
ENSMUSG00000087294	3.68697	1.98837	1.50398	-1.32207	0.186144	0.443145	Gm13556
ENSMUSG00000001930	44.5123	1.98591	0.815638	-2.43479	0.0149006	0.0730805	Vwf
ENSMUSG00000030894	4436.84	1.98529	0.534466	-3.71453	0.000203578	0.00209734	Tpp1
ENSMUSG00000032356	6.06699	1.98353	1.3085	-1.51588	0.129549	0.349378	Rasgrf1
ENSMUSG00000082534	4.77511	1.97679	1.44759	-1.36558	0.172071	0.421966	Gm13712
ENSMUSG00000045268	32.3234	1.97581	0.962826	-2.05209	0.0401608	0.155269	Zfp691
ENSMUSG00000062783	16.4487	1.97514	1.00737	-1.96069	0.0499155	0.181396	Csprs
ENSMUSG00000041429	48.6687	1.97424	0.785957	-2.5119	0.0120084	0.0618774	Nthl1
ENSMUSG00000020798	114.815	1.9708	0.6426	-3.06692	0.00216274	0.015373	Spns3
ENSMUSG00000047371	43.7057	1.97044	0.913424	-2.1572	0.0309897	0.12812	Zfp768
ENSMUSG00000109268	7.26699	1.97011	1.25105	-1.57477	0.11531	0.323315	RP23-26C21.3
ENSMUSG00000103749	4.53069	1.96965	1.55982	-1.26274	0.206681	0.471699	Pcdhgb5
ENSMUSG00000104200	3.6221	1.96832	1.45532	-1.3525	0.176215	0.427827	Gm37399
ENSMUSG00000041515	3268.63	1.968	0.691732	-2.84504	0.00444065	0.0279139	Irf8
ENSMUSG00000026773	693.547	1.96414	0.857234	-2.29126	0.0219486	0.0990725	Pfkfb3
ENSMUSG00000016528	501.854	1.964	0.694145	-2.82938	0.00466387	0.0291565	Mapkapk2
ENSMUSG00000041977	22.4358	1.9638	1.1829	-1.66016	0.0968827	0.287108	Arhgef11
ENSMUSG00000083649	12.486	1.96352	1.07128	-1.83287	0.0668224	0.221618	Rasl2-9
ENSMUSG00000029094	84.5813	1.96267	0.782925	-2.50684	0.0121814	0.0624871	Afap1
ENSMUSG00000105326	10.2225	1.96225	1.13337	-1.73134	0.0833913	0.259698	6030400A10Rik
ENSMUSG00000063171	93.8526	1.96172	0.716877	-2.73648	0.00621013	0.036509	Rps4l
ENSMUSG00000026473	1253.44	1.96087	0.592098	-3.31172	0.000927229	0.00752473	Glul
ENSMUSG00000029217	122.714	1.96075	0.648185	-3.02498	0.0024865	0.0172645	Tec
ENSMUSG00000083208	4.27338	1.9604	1.48808	-1.3174	0.187703	0.445464	Gm11522
ENSMUSG00000075511	10.0539	1.95929	1.32101	-1.48317	0.13803	0.364317	1700001L05Rik
ENSMUSG00000031896	5.72	1.95811	1.33674	-1.46484	0.142964	0.373296	Ctrl
ENSMUSG00000022433	165.757	1.95744	0.610104	-3.20837	0.00133489	0.0101863	Csnk1e
ENSMUSG00000105929	14.4564	1.9574	1.03333	-1.89427	0.0581894	0.202328	Gm43693
ENSMUSG00000055725	124.796	1.95646	0.651694	-3.00212	0.00268105	0.0184023	Paqr3
ENSMUSG00000027422	2908.5	1.95521	0.563957	-3.46695	0.000526392	0.00468592	Rrbp1
ENSMUSG00000040809	913.946	1.95508	0.573023	-3.41188	0.000645176	0.00553369	Chil3
ENSMUSG00000053175	115.73	1.95401	0.656149	-2.978	0.00290139	0.0196447	Bcl3
ENSMUSG00000073889	190.818	1.95389	0.613893	-3.1828	0.00145861	0.010968	Il11ra1
ENSMUSG00000039497	1153.96	1.95296	0.555061	-3.51845	0.00043407	0.0039885	Dse
ENSMUSG00000097586	3.6378	1.95204	1.5073	-1.29506	0.195299	0.456327	Gm26528
ENSMUSG00000032261	47.5344	1.95091	0.755568	-2.58204	0.00982183	0.0526796	Sh3bgrl2
ENSMUSG00000039682	690.082	1.9509	0.56637	-3.44457	0.000571965	0.00500791	Lap3
ENSMUSG00000028917	116.989	1.94758	0.871656	-2.23434	0.0254605	0.11085	Plekhm2
ENSMUSG00000034709	471.512	1.94441	0.567255	-3.42775	0.0006086	0.00527798	Ppp1r21
ENSMUSG00000019970	3041.33	1.94298	0.573679	-3.38687	0.000706958	0.0059833	Sgk1
ENSMUSG00000030990	1327.27	1.94292	0.54037	-3.59554	0.000323718	0.00310113	Pgap2
ENSMUSG00000031652	729.794	1.94239	0.547695	-3.54649	0.000390404	0.00362901	N4bp1
ENSMUSG00000048234	295.288	1.94212	0.605475	-3.20759	0.00133852	0.0102092	Rnf149
ENSMUSG00000022108	72480.2	1.94147	0.560405	-3.46442	0.000531385	0.00471198	Itm2b
ENSMUSG00000023191	14.0753	1.93802	1.14708	-1.68952	0.091119	0.27513	P3h3
ENSMUSG00000045639	13.0416	1.93681	1.10577	-1.75155	0.0798512	0.251269	Zfp629
ENSMUSG00000072109	298.451	1.93266	0.589589	-3.27798	0.00104555	0.00833671	A530040E14Rik
ENSMUSG00000024357	292.065	1.92981	0.623562	-3.09482	0.00196935	0.0141734	Sil1
ENSMUSG00000026627	720.002	1.92893	0.569169	-3.38903	0.000701391	0.00594879	Tmem206
ENSMUSG00000022564	3921.91	1.92851	0.761444	-2.53271	0.0113186	0.0591625	Grina
ENSMUSG00000070331	5.59244	1.92766	1.33543	-1.44348	0.148886	0.383162	Qrich2
ENSMUSG00000010095	7961.38	1.9275	0.563312	-3.42173	0.000622232	0.0053686	Slc3a2
ENSMUSG00000074673	3.584	1.92498	1.51717	-1.2688	0.204514	0.468891	Ttll9
ENSMUSG00000096977	3.584	1.92498	1.51717	-1.2688	0.204514	0.468891	Gm10827
ENSMUSG00000063660	3.71156	1.92309	1.5291	-1.25766	0.208514	0.474667	Olfr98
ENSMUSG00000102808	10.7551	1.92275	1.17904	-1.63077	0.102939	0.298733	5430420F09Rik
ENSMUSG00000040327	56.5398	1.92229	1.07554	-1.78729	0.0738913	0.238335	Cul9
ENSMUSG00000063856	11432.4	1.92135	0.635804	-3.02192	0.00251174	0.0173971	Gpx1
ENSMUSG00000041992	49.7246	1.92121	0.755752	-2.54211	0.0110184	0.0578585	Rapgef5
ENSMUSG00000005968	105.179	1.91902	0.747722	-2.56648	0.0102735	0.054611	Tuft1
ENSMUSG00000089631	6.76785	1.91693	1.27104	-1.50816	0.131513	0.352761	Gm16326
ENSMUSG00000037827	308.217	1.91652	0.688622	-2.78312	0.00538388	0.0327356	Gm5884
ENSMUSG00000039899	8338.89	1.91555	0.546185	-3.50714	0.000452953	0.00413113	Fgl2
ENSMUSG00000037936	764.754	1.91455	0.986297	-1.94115	0.05224	0.188061	Scarb1
ENSMUSG00000029098	808.81	1.9126	0.86606	-2.20839	0.0272168	0.116594	Acox3
ENSMUSG00000037526	260.013	1.91229	0.731414	-2.61451	0.00893563	0.0488981	Atg14
ENSMUSG00000052459	3905.34	1.91184	0.538477	-3.55045	0.000384579	0.00358549	Atp6v1a
ENSMUSG00000066151	1574.89	1.91129	0.636519	-3.00273	0.00267572	0.0183973	Fkbp15
ENSMUSG00000085058	17.4317	1.91093	1.00614	-1.89927	0.0575296	0.200845	8030453O22Rik
ENSMUSG00000019558	30.8629	1.9099	0.907102	-2.10549	0.0352482	0.141051	Slc6a8
ENSMUSG00000081731	72.4901	1.90934	0.69182	-2.75989	0.00578216	0.0344879	Calr-ps
ENSMUSG00000036067	470.563	1.90905	0.719259	-2.65419	0.00794982	0.044572	Slc2a6
ENSMUSG00000008682	154.727	1.90887	0.633935	-3.01115	0.00260263	0.0179363	Rpl10
ENSMUSG00000033488	123.508	1.90753	0.630505	-3.0254	0.00248308	0.0172509	BC026585
ENSMUSG00000031490	1018.09	1.90737	0.585484	-3.25777	0.00112291	0.00885637	Eif4ebp1
ENSMUSG00000100141	7.01188	1.90637	1.25999	-1.51301	0.130278	0.350784	Gm6445
ENSMUSG00000085274	14.7679	1.90636	1.12935	-1.68801	0.0914084	0.27564	BC046401
ENSMUSG00000030041	119.964	1.90353	0.752232	-2.53051	0.0113895	0.0594256	M1ap
ENSMUSG00000090185	12.2936	1.90182	1.07084	-1.77601	0.075731	0.242215	Gm15523
ENSMUSG00000081809	30.1138	1.89968	0.834991	-2.27509	0.0229004	0.102071	Gm15539
ENSMUSG00000030847	303.271	1.8994	0.845566	-2.24631	0.0246844	0.108093	Bag3
ENSMUSG00000102415	17.7249	1.89881	1.02626	-1.85023	0.0642811	0.216186	A430110C17Rik
ENSMUSG00000024869	112.881	1.89855	0.666647	-2.8479	0.00440087	0.0277293	Nudt8
ENSMUSG00000040040	68.8738	1.89527	0.774654	-2.44661	0.0144208	0.0712964	Ift88
ENSMUSG00000025491	4384.17	1.89287	0.685052	-2.7631	0.00572544	0.0342263	Ifitm1
ENSMUSG00000084918	25.7828	1.89284	0.935631	-2.02306	0.0430666	0.163381	Gm12708
ENSMUSG00000038517	47.3139	1.8913	0.832789	-2.27104	0.0231444	0.102872	Tbkbp1
ENSMUSG00000045048	9.80393	1.8912	1.30059	-1.45411	0.145917	0.3782	Gm9795
ENSMUSG00000079053	10.7712	1.88892	1.12508	-1.67892	0.0931668	0.279203	Gm14010
ENSMUSG00000036560	7.32967	1.88857	1.28257	-1.4725	0.140887	0.369297	Lgi4
ENSMUSG00000025350	9.85772	1.88815	1.30562	-1.44617	0.14813	0.381825	Rdh5
ENSMUSG00000066682	947.965	1.88712	0.629037	-3.00002	0.00269966	0.0185221	Pilrb2
ENSMUSG00000101262	4.01827	1.88682	1.48929	-1.26693	0.20518	0.469889	Gm8326
ENSMUSG00000092216	16.064	1.8864	1.06932	-1.76411	0.0777136	0.246295	Gm19345
ENSMUSG00000019254	285.989	1.88506	0.580737	-3.24598	0.00117046	0.00918601	Ppp1r12c
ENSMUSG00000020101	5192.25	1.88499	0.690149	-2.73127	0.00630902	0.0368666	Vsir
ENSMUSG00000102151	109.207	1.88429	0.697946	-2.69977	0.00693884	0.0399265	Gm37472
ENSMUSG00000034783	33.0369	1.88419	0.91033	-2.06978	0.0384727	0.150307	Cd207
ENSMUSG00000036985	404.172	1.884	0.83434	-2.25807	0.0239411	0.105707	Zdhhc9
ENSMUSG00000039087	184.488	1.88395	0.707141	-2.66417	0.00771782	0.0435239	Rreb1
ENSMUSG00000028556	148.428	1.8838	0.692555	-2.72007	0.00652678	0.037882	Dock7
ENSMUSG00000038507	367.632	1.88095	0.631024	-2.98079	0.00287505	0.0194911	Parp12
ENSMUSG00000040329	7.30508	1.87997	1.28239	-1.46599	0.142651	0.372758	Il7
ENSMUSG00000026358	9217.06	1.87949	0.657221	-2.85975	0.00423974	0.0268943	Rgs1
ENSMUSG00000090778	4.04286	1.87948	1.49664	-1.2558	0.209188	0.475415	Gm3235
ENSMUSG00000058756	40.6935	1.87918	0.843346	-2.22824	0.0258642	0.111971	Thra
ENSMUSG00000024242	82.8304	1.87888	0.788523	-2.38278	0.0171823	0.08164	Map4k3
ENSMUSG00000029314	30.1647	1.87883	0.890809	-2.10912	0.0349339	0.140183	Agpat9
ENSMUSG00000021279	82.1033	1.87709	1.03362	-1.81603	0.0693657	0.227737	Cdc42bpb
ENSMUSG00000081758	22.0851	1.8769	0.942976	-1.9904	0.0465471	0.17273	Gm11460
ENSMUSG00000003382	330.526	1.87566	0.664886	-2.82102	0.00478711	0.0297871	Etv3
ENSMUSG00000059824	40.9417	1.87459	0.771228	-2.43066	0.0150714	0.073692	Dbp
ENSMUSG00000028914	511.771	1.87351	0.748486	-2.50307	0.012312	0.0630556	Casp9
ENSMUSG00000021271	92.1191	1.87327	0.731194	-2.56193	0.0104092	0.0551855	Zfp839
ENSMUSG00000004864	70.2253	1.87272	0.694437	-2.69675	0.00700201	0.0402031	Mapk13
ENSMUSG00000024985	1764.14	1.87199	0.59266	-3.15863	0.00158512	0.0117534	Tcf7l2
ENSMUSG00000032633	1433.42	1.87126	0.851297	-2.19813	0.02794	0.118706	Flcn
ENSMUSG00000092274	2804.41	1.87091	0.624396	-2.99635	0.00273228	0.0186897	Neat1
ENSMUSG00000041926	4970.38	1.86857	0.671623	-2.78218	0.00539958	0.0328023	Rnpep
ENSMUSG00000034744	724.945	1.86771	0.576605	-3.23916	0.00119884	0.00935823	Nagk
ENSMUSG00000015027	578.376	1.86713	0.610289	-3.05942	0.00221766	0.0157075	Galns
ENSMUSG00000031543	5.50517	1.86703	1.41698	-1.31761	0.187634	0.445366	Ank1
ENSMUSG00000038301	2071.17	1.86554	0.590226	-3.16072	0.00157379	0.0116911	Snx10
ENSMUSG00000011382	44.2802	1.86516	0.772787	-2.41355	0.0157981	0.0764964	Dhdh
ENSMUSG00000005054	2486.98	1.86475	0.644507	-2.89329	0.00381229	0.0246127	Cstb
ENSMUSG00000001062	309.689	1.86334	0.904805	-2.05938	0.0394574	0.152957	Vps9d1
ENSMUSG00000107041	83.3097	1.86229	0.671935	-2.77153	0.0055794	0.03363	Gm42735
ENSMUSG00000031497	499.921	1.86101	0.671573	-2.77112	0.00558642	0.0336468	Tnfsf13b
ENSMUSG00000020935	809.897	1.85557	0.550183	-3.37264	0.000744524	0.00625157	Dcakd
ENSMUSG00000090192	7.25129	1.85515	1.30429	-1.42235	0.154925	0.394007	Gm16556
ENSMUSG00000024818	1485.11	1.85507	0.626767	-2.95974	0.00307901	0.0206634	Slc25a45
ENSMUSG00000031447	796.12	1.85361	0.639948	-2.8965	0.00377348	0.0243721	Lamp1
ENSMUSG00000043964	785.817	1.85316	0.586632	-3.15898	0.00158323	0.0117448	Orai3
ENSMUSG00000085467	26.5917	1.85311	0.892866	-2.07546	0.0379439	0.148779	Gm11842
ENSMUSG00000042719	717.377	1.85082	0.554772	-3.33617	0.000849399	0.00698895	Naa25
ENSMUSG00000048216	27.1114	1.85018	0.909549	-2.03417	0.0419341	0.160264	Gpr85
ENSMUSG00000074250	34.4513	1.85015	1.07093	-1.72761	0.0840585	0.26086	Gm10653
ENSMUSG00000034118	165.115	1.84954	0.678769	-2.72484	0.00643323	0.037435	Tpst1
ENSMUSG00000046731	102.883	1.84793	0.935882	-1.97453	0.0483211	0.177908	Kctd11
ENSMUSG00000067370	234.008	1.84628	0.839148	-2.20019	0.0277935	0.118209	B3galt4
ENSMUSG00000109455	180.565	1.83961	0.609047	-3.02047	0.00252379	0.0174654	RP23-466P2.3
ENSMUSG00000040268	499.163	1.83791	0.558954	-3.28813	0.00100856	0.00807722	Plekha1
ENSMUSG00000109539	15.2225	1.83755	1.10433	-1.66394	0.0961234	0.2856	RP23-413C19.2
ENSMUSG00000097381	39.142	1.83718	1.0665	-1.72262	0.084957	0.262857	A230087F16Rik
ENSMUSG00000073982	2258.09	1.83677	0.738557	-2.48697	0.0128837	0.065231	Rhog
ENSMUSG00000049086	156.107	1.83555	0.607207	-3.02295	0.00250326	0.0173534	Bmyc
ENSMUSG00000085315	39.3814	1.83491	0.773947	-2.37085	0.0177471	0.0837869	A430018G15Rik
ENSMUSG00000018585	3611.77	1.83413	0.568094	-3.22857	0.00124409	0.00964893	Atox1
ENSMUSG00000089872	154.675	1.83187	0.713252	-2.56834	0.0102187	0.0544224	Rps6kc1
ENSMUSG00000106208	3.89071	1.83037	1.49651	-1.2231	0.221293	0.492758	Gm4734
ENSMUSG00000024507	2048.85	1.8301	0.547841	-3.34056	0.000836083	0.00689003	Hsd17b4
ENSMUSG00000105813	196.148	1.8298	0.628458	-2.91157	0.00359621	0.0234738	Gm42928
ENSMUSG00000032012	33.8581	1.82548	1.06938	-1.70704	0.0878145	0.268913	Pvrl1
ENSMUSG00000027381	1030.22	1.82123	0.70012	-2.60132	0.00928658	0.0505761	Bcl2l11
ENSMUSG00000056153	695.247	1.82084	0.586631	-3.10388	0.00190998	0.013816	Socs6
ENSMUSG00000086763	30.9729	1.82003	0.932709	-1.95134	0.051017	0.184643	Plxna4os1
ENSMUSG00000032000	1696.44	1.81959	0.54604	-3.33234	0.00086118	0.00706406	Birc3
ENSMUSG00000018102	209.037	1.81757	0.66583	-2.72977	0.00633776	0.0369872	Hist1h2bc
ENSMUSG00000028657	7417.57	1.81751	0.59556	-3.05177	0.00227493	0.0160207	Ppt1
ENSMUSG00000005615	427.754	1.81591	0.640623	-2.8346	0.00458838	0.0287407	Pcyt1a
ENSMUSG00000003484	10771.6	1.81548	0.740051	-2.45318	0.0141599	0.0704424	Cyp4f18
ENSMUSG00000034714	41.1596	1.81461	0.894165	-2.02939	0.0424189	0.161537	Ttyh2
ENSMUSG00000071379	1192.01	1.81374	0.540074	-3.35832	0.000784187	0.00653442	Hpcal1
ENSMUSG00000043323	55.1538	1.81295	0.757497	-2.39334	0.0166959	0.0798514	Fbrsl1
ENSMUSG00000003546	486.414	1.81192	0.645189	-2.80835	0.0049796	0.030781	Klc4
ENSMUSG00000038540	5.31274	1.81179	1.3654	-1.32693	0.184532	0.440297	Tmc3
ENSMUSG00000026525	22.2281	1.81121	1.06042	-1.70802	0.0876326	0.268562	Opn3
ENSMUSG00000035458	12.3186	1.81076	1.0683	-1.695	0.0900757	0.273155	Tnni3
ENSMUSG00000022667	270.852	1.80949	0.727017	-2.48892	0.0128132	0.0650239	Cd200r1
ENSMUSG00000039910	353.479	1.80862	0.731881	-2.4712	0.013466	0.0676075	Cited2
ENSMUSG00000097680	891.707	1.80807	0.661627	-2.73276	0.00628064	0.0367748	Gm26642
ENSMUSG00000005534	99.6119	1.80744	0.689919	-2.61979	0.00879837	0.0482793	Insr
ENSMUSG00000039199	50.9213	1.80683	1.15795	-1.56038	0.118671	0.329553	Zdhhc1
ENSMUSG00000024379	5.24747	1.805	1.45258	-1.24262	0.214009	0.481506	Tslp
ENSMUSG00000018899	2923.97	1.80492	0.607041	-2.97331	0.00294609	0.0199054	Irf1
ENSMUSG00000022225	41.3422	1.80471	0.978436	-1.84449	0.0651122	0.217982	Cma1
ENSMUSG00000043833	30.4823	1.80389	0.988293	-1.82526	0.0679617	0.224326	2900005J15Rik
ENSMUSG00000004846	802.701	1.80205	0.645553	-2.79148	0.00524668	0.0321214	Plod3
ENSMUSG00000008167	57.6683	1.80167	0.774237	-2.32702	0.0199641	0.0920123	Fbxw9
ENSMUSG00000062980	33.3428	1.80065	0.81777	-2.2019	0.0276723	0.117882	Cped1
ENSMUSG00000082197	84.2159	1.79936	0.661576	-2.7198	0.00653209	0.0378861	Gm8577
ENSMUSG00000034041	393.687	1.79908	0.873504	-2.05962	0.0394353	0.152942	Lyl1
ENSMUSG00000038143	5.27465	1.7984	1.42782	-1.25955	0.207833	0.473409	Stox2
ENSMUSG00000025701	61.6501	1.7975	0.900811	-1.99542	0.045997	0.171206	Alox5
ENSMUSG00000032204	66.1276	1.797	0.75828	-2.36984	0.0177959	0.0839316	Aqp9
ENSMUSG00000019960	4012.74	1.79664	0.548701	-3.27435	0.00105904	0.0084149	Dusp6
ENSMUSG00000030284	125.527	1.79623	0.980759	-1.83147	0.0670299	0.221985	Creld1
ENSMUSG00000063652	21.0417	1.79578	0.933911	-1.92286	0.0544971	0.193513	Slc22a21
ENSMUSG00000029994	4543.91	1.79356	0.626972	-2.86067	0.00422742	0.0268268	Anxa4
ENSMUSG00000087968	4.43943	1.79281	1.39992	-1.28065	0.200317	0.46343	Gm25395
ENSMUSG00000059277	504.45	1.79109	0.678694	-2.63902	0.0083146	0.046084	R74862
ENSMUSG00000027506	5906.36	1.78971	0.717838	-2.4932	0.0126598	0.0644445	Tpd52
ENSMUSG00000094594	620.401	1.78959	0.691887	-2.58654	0.00969462	0.0522463	Tpd52-ps
ENSMUSG00000021948	3833.57	1.78851	0.621307	-2.87863	0.00399407	0.0256002	Prkcd
ENSMUSG00000091191	342.997	1.78618	0.813134	-2.19667	0.0280443	0.118906	Gm17334
ENSMUSG00000085523	11.3308	1.78602	1.1528	-1.54929	0.121311	0.334269	Gm15945
ENSMUSG00000029455	483.424	1.78497	1.09725	-1.62677	0.103787	0.300497	Aldh2
ENSMUSG00000041836	1644.27	1.78486	0.542965	-3.28725	0.0010117	0.00809199	Ptpre
ENSMUSG00000020300	71.6131	1.78467	0.691534	-2.58074	0.00985887	0.0528109	Cpeb4
ENSMUSG00000058755	201.181	1.78443	0.840537	-2.12297	0.0337566	0.136799	Osm
ENSMUSG00000067610	30.322	1.78389	0.886058	-2.01329	0.0440843	0.165981	Klri1
ENSMUSG00000044058	4.2111	1.78345	1.4755	-1.20871	0.226774	0.499122	Mthfr-ps1
ENSMUSG00000033792	758.266	1.78341	0.639853	-2.78721	0.0053164	0.0324116	Atp7a
ENSMUSG00000026836	34.2319	1.78173	0.823508	-2.16359	0.0304958	0.126698	Acvr1
ENSMUSG00000038811	4031.98	1.78109	0.635264	-2.8037	0.00505196	0.031112	Gngt2
ENSMUSG00000030589	472.715	1.78031	0.756013	-2.35486	0.0185295	0.0868022	Rasgrp4
ENSMUSG00000087612	125.296	1.78009	0.624172	-2.85193	0.00434553	0.0274781	A230005M16Rik
ENSMUSG00000024922	7.35465	1.77958	1.23609	-1.43968	0.149957	0.384679	Ovol1
ENSMUSG00000025795	73.0539	1.77813	0.73207	-2.42891	0.0151444	0.0739813	Rassf3
ENSMUSG00000021285	102.989	1.77643	0.644739	-2.75527	0.00586429	0.0349126	Ppp1r13b
ENSMUSG00000053553	474.953	1.77548	0.56443	-3.14562	0.00165735	0.0122097	3110082I17Rik
ENSMUSG00000017697	302.92	1.77515	0.615045	-2.8862	0.00389919	0.0251028	Ada
ENSMUSG00000052713	108.179	1.77471	0.676435	-2.62363	0.00869989	0.0478869	Zfp608
ENSMUSG00000070605	37.2181	1.77447	0.886976	-2.00058	0.0454376	0.169677	Gm13251
ENSMUSG00000031400	1884.83	1.77441	0.609633	-2.91062	0.0036071	0.0235257	G6pdx
ENSMUSG00000019080	115.549	1.77336	0.63088	-2.81093	0.00493982	0.0305943	Mfsd3
ENSMUSG00000015766	551.236	1.77306	0.614455	-2.88558	0.00390694	0.0251426	Eps8
ENSMUSG00000108377	7.37924	1.77278	1.25388	-1.41384	0.15741	0.398046	RP24-168I21.1
ENSMUSG00000019718	6.93811	1.77218	1.35648	-1.30646	0.191397	0.450949	L3hypdh
ENSMUSG00000108456	15.8609	1.77217	0.996545	-1.77831	0.0753524	0.24155	RP24-143K11.2
ENSMUSG00000102158	4.41484	1.77133	1.40438	-1.26129	0.207204	0.472649	Gm34342
ENSMUSG00000024639	174.477	1.7713	0.843065	-2.10102	0.0356392	0.141997	Gnaq
ENSMUSG00000004207	8477.09	1.77128	1.00411	-1.76403	0.0777264	0.246295	Psap
ENSMUSG00000039254	164.145	1.77087	0.968171	-1.82909	0.0673863	0.2228	Pomt1
ENSMUSG00000103646	15.5224	1.77076	1.08379	-1.63386	0.102289	0.297447	Gm37706
ENSMUSG00000100108	14.0401	1.77007	1.06803	-1.65733	0.0974531	0.288211	Gm28100
ENSMUSG00000056121	1354.03	1.76988	0.556347	-3.18124	0.00146645	0.0110079	Fez2
ENSMUSG00000029534	189.809	1.76981	0.594649	-2.97623	0.00291817	0.0197356	St7
ENSMUSG00000024570	1333.57	1.76875	0.556421	-3.17879	0.00147889	0.0110841	Rbfa
ENSMUSG00000092220	511.382	1.76754	0.677407	-2.60927	0.00907343	0.0496012	Gm20528
ENSMUSG00000024055	696.95	1.76701	0.63572	-2.77954	0.00544358	0.0330357	Cyp4f13
ENSMUSG00000083796	8.82327	1.76548	1.21848	-1.44892	0.147359	0.380587	Gm13369
ENSMUSG00000028621	54.9639	1.76522	0.973726	-1.81285	0.0698552	0.228758	Cyb5rl
ENSMUSG00000068323	5.22086	1.76354	1.44878	-1.21726	0.223504	0.495129	Slc4a5
ENSMUSG00000084960	39.5567	1.76352	0.77172	-2.28518	0.0223025	0.100132	B430010I23Rik
ENSMUSG00000035273	755.143	1.76269	0.604835	-2.91433	0.00356454	0.0233242	Hpse
ENSMUSG00000003814	8023.93	1.76247	0.543094	-3.24524	0.00117353	0.00920559	Calr
ENSMUSG00000100367	16.6939	1.76091	0.987458	-1.78328	0.0745409	0.240042	Gm29336
ENSMUSG00000097700	28.3166	1.76085	0.848089	-2.07626	0.0378704	0.148571	Gm26738
ENSMUSG00000020707	551.755	1.7603	0.57498	-3.0615	0.00220233	0.0156127	Rnf135
ENSMUSG00000083677	11.6538	1.75957	1.13179	-1.55468	0.120021	0.332263	Gm11699
ENSMUSG00000087611	4.23568	1.75818	1.49302	-1.1776	0.238957	0.514986	4930458D05Rik
ENSMUSG00000030055	34.1106	1.75572	0.859994	-2.04155	0.041196	0.1582	Rab43
ENSMUSG00000009418	217.74	1.75279	0.588898	-2.9764	0.00291659	0.0197356	Nav1
ENSMUSG00000000628	410.753	1.75199	0.566989	-3.08999	0.00200162	0.014349	Hk2
ENSMUSG00000032060	34.31	1.75129	0.940761	-1.86157	0.0626641	0.212322	Cryab
ENSMUSG00000106205	9.04529	1.75078	1.16653	-1.50084	0.133398	0.356211	C230096K16Rik
ENSMUSG00000039046	102.574	1.7496	0.762326	-2.29508	0.0217284	0.0982172	Usp6nl
ENSMUSG00000030199	360.893	1.7494	0.566093	-3.09031	0.00199947	0.01434	Etv6
ENSMUSG00000030522	173.932	1.74939	0.815536	-2.14508	0.0319461	0.131057	Mtmr10
ENSMUSG00000004630	69.7935	1.74882	0.752393	-2.32434	0.0201072	0.0925384	Pcp2
ENSMUSG00000052776	2391.59	1.74809	0.592719	-2.94928	0.00318517	0.0212597	Oas1a
ENSMUSG00000025512	855.901	1.74682	0.578365	-3.02027	0.00252549	0.0174696	Chid1
ENSMUSG00000071856	10.8768	1.74596	1.29009	-1.35336	0.17594	0.427322	Mcc
ENSMUSG00000028879	1220.76	1.74583	0.542687	-3.21702	0.00129529	0.0099555	Stx12
ENSMUSG00000027340	240.645	1.74362	0.636099	-2.74112	0.00612308	0.0361036	Slc23a2
ENSMUSG00000041538	87.2184	1.74242	0.831598	-2.09527	0.0361469	0.143359	H2-Ob
ENSMUSG00000041762	123.752	1.7421	0.627191	-2.77763	0.00547571	0.0331677	Gpr155
ENSMUSG00000036964	8.7491	1.74203	1.34516	-1.29504	0.195308	0.456327	Trim17
ENSMUSG00000073407	5.18518	1.74186	1.39323	-1.25023	0.211216	0.478241	Gm6034
ENSMUSG00000030452	1730.5	1.7417	0.538969	-3.23153	0.00123128	0.0095647	Nipa2
ENSMUSG00000020641	1839.58	1.73963	0.572479	-3.03877	0.00237545	0.0166406	Rsad2
ENSMUSG00000097243	4.16192	1.73699	1.48588	-1.16899	0.242406	0.519367	Gm26908
ENSMUSG00000107411	20.8807	1.73656	0.939433	-1.84852	0.0645269	0.216658	Gm19040
ENSMUSG00000035678	368.441	1.73656	0.571517	-3.03851	0.00237749	0.016643	Tnfsf9
ENSMUSG00000032353	1372.78	1.73643	0.543962	-3.19218	0.00141202	0.0106881	Tmed3
ENSMUSG00000024953	7371.85	1.73493	0.567325	-3.05808	0.00222758	0.0157638	Prdx5
ENSMUSG00000061411	29.0289	1.73165	0.844214	-2.0512	0.0402477	0.155418	Nol4l
ENSMUSG00000097334	9.06729	1.73164	1.24124	-1.39509	0.162988	0.408221	2700012I20Rik
ENSMUSG00000063760	20.0569	1.73019	0.948489	-1.82415	0.0681292	0.224739	Rnf217
ENSMUSG00000039616	155.997	1.72917	0.661806	-2.61281	0.00898006	0.0491244	Mocos
ENSMUSG00000023947	1560.55	1.72884	0.617847	-2.79817	0.00513928	0.0315606	Nfkbie
ENSMUSG00000108030	4.1954	1.72836	1.45942	-1.18428	0.236302	0.511843	9530062K07Rik
ENSMUSG00000025059	1556.57	1.72738	0.607391	-2.84393	0.00445602	0.0279995	Gk
ENSMUSG00000098923	534.973	1.72714	0.562873	-3.06844	0.00215183	0.015309	Tmem185b
ENSMUSG00000033365	561.241	1.72529	0.877884	-1.96528	0.0493817	0.18003	Ipo13
ENSMUSG00000037706	3439.52	1.72245	0.667372	-2.58095	0.00985281	0.0527962	Cd81
ENSMUSG00000074802	237.098	1.7219	0.665388	-2.58781	0.00965885	0.0520887	Gas2l3
ENSMUSG00000034117	7.09954	1.72063	1.23921	-1.3885	0.164986	0.411134	Ptgdr2
ENSMUSG00000051107	15.308	1.72037	1.05213	-1.63514	0.10202	0.296774	Gm15440
ENSMUSG00000092074	90.6963	1.71935	0.67438	-2.54953	0.0107867	0.0569601	Dynlt1a
ENSMUSG00000003134	351.201	1.71908	0.690897	-2.48819	0.0128395	0.0650691	Tbc1d8
ENSMUSG00000015837	5693.88	1.71695	0.56507	-3.03846	0.00237787	0.016643	Sqstm1
ENSMUSG00000093424	13.0173	1.71675	1.0646	-1.61259	0.106834	0.30572	6330562C20Rik
ENSMUSG00000087658	7.8673	1.7144	1.28149	-1.33781	0.180957	0.435666	Hotairm1
ENSMUSG00000057672	751.649	1.71418	0.695939	-2.46311	0.0137737	0.0689073	Pkn1
ENSMUSG00000072941	17.4031	1.71279	1.25864	-1.36082	0.17357	0.423916	Sod3
ENSMUSG00000097375	8.66482	1.71252	1.24974	-1.3703	0.170593	0.419435	6720427I07Rik
ENSMUSG00000109267	5.94872	1.71174	1.29473	-1.32208	0.186142	0.443145	RP24-215A14.3
ENSMUSG00000097369	5.64404	1.7112	1.38758	-1.23322	0.217492	0.486981	Gm26545
ENSMUSG00000071203	195.13	1.71038	0.623296	-2.74409	0.00606798	0.0358183	Naip5
ENSMUSG00000084974	65.4711	1.71018	0.894857	-1.91112	0.0559886	0.197144	Gm15567
ENSMUSG00000039145	926.863	1.70858	0.632668	-2.7006	0.00692153	0.0398556	Camk1d
ENSMUSG00000038390	14.4102	1.70845	1.24739	-1.36962	0.170806	0.419635	Gpr162
ENSMUSG00000026632	117.982	1.7081	0.707516	-2.41422	0.0157689	0.0764011	Tatdn3
ENSMUSG00000038022	14.8783	1.70697	1.08508	-1.57313	0.115688	0.324071	Fam188b
ENSMUSG00000064179	19.0269	1.70588	0.951725	-1.79241	0.0730675	0.236489	Tnnt1
ENSMUSG00000030539	57.8625	1.70573	0.778474	-2.19112	0.0284435	0.120186	Sema4b
ENSMUSG00000032487	166.397	1.70459	0.623411	-2.7343	0.00625138	0.0366841	Ptgs2
ENSMUSG00000045757	130.761	1.70423	0.744988	-2.28759	0.0221612	0.0997379	Zfp764
ENSMUSG00000020092	277.39	1.70397	0.63525	-2.68237	0.00731035	0.0418082	Pald1
ENSMUSG00000097523	6.2911	1.70391	1.32619	-1.28481	0.198858	0.461184	1700022N22Rik
ENSMUSG00000039716	5.82758	1.70374	1.49523	-1.13945	0.254516	0.534276	Dock3
ENSMUSG00000075558	3.58181	1.70282	1.51496	-1.124	0.261014	0.541936	Gm17151
ENSMUSG00000034480	154.53	1.7026	0.610807	-2.78745	0.00531242	0.0323997	Diaph2
ENSMUSG00000085882	50.6479	1.70158	0.828689	-2.05333	0.0400402	0.154883	2610507I01Rik
ENSMUSG00000000673	332.353	1.70088	0.619871	-2.74392	0.00607105	0.0358232	Haao
ENSMUSG00000104154	3.98057	1.70014	1.48558	-1.14443	0.252445	0.531604	Gm38104
ENSMUSG00000049807	8.48347	1.69993	1.23507	-1.37639	0.1687	0.416906	Arhgap23
ENSMUSG00000047766	91.5268	1.6995	0.693517	-2.45055	0.0142639	0.0708276	Lrrc49
ENSMUSG00000025875	116.543	1.69863	0.722919	-2.34968	0.0187897	0.0878154	Tspan17
ENSMUSG00000039501	2286.27	1.69836	0.713661	-2.37979	0.0173223	0.0821346	Znfx1
ENSMUSG00000106664	50.3889	1.6978	0.772632	-2.19742	0.0279904	0.118825	Gm17936
ENSMUSG00000022353	72.896	1.69741	0.740875	-2.29109	0.021958	0.0990871	Mtss1
ENSMUSG00000030321	4.87628	1.69512	1.37374	-1.23395	0.217223	0.48668	Efcab12
ENSMUSG00000097006	194.347	1.69376	0.680559	-2.48877	0.0128184	0.0650239	9530082P21Rik
ENSMUSG00000015312	193.783	1.69357	0.642471	-2.63603	0.00838819	0.0464592	Gadd45b
ENSMUSG00000046806	965.137	1.69165	0.553928	-3.05392	0.0022587	0.0159275	3110062M04Rik
ENSMUSG00000028268	4780.6	1.69043	0.593225	-2.84955	0.00437808	0.0276293	Gbp3
ENSMUSG00000030142	1979.24	1.6901	0.725245	-2.33038	0.019786	0.0914553	Clec4e
ENSMUSG00000026456	505.999	1.689	0.568056	-2.9733	0.00294614	0.0199054	Cyb5r1
ENSMUSG00000106339	4.81101	1.68895	1.46216	-1.15511	0.248046	0.526995	Gm43489
ENSMUSG00000039678	80.8847	1.6842	0.672892	-2.50292	0.0123172	0.0630619	Tbc1d13
ENSMUSG00000036833	1744.62	1.68271	0.786895	-2.13841	0.0324833	0.132712	Pnpla7
ENSMUSG00000029311	33.3372	1.68118	0.803323	-2.09278	0.0363685	0.143916	Hsd17b11
ENSMUSG00000031729	4208.88	1.68096	0.532549	-3.15644	0.00159707	0.011831	Ist1
ENSMUSG00000005686	90.7849	1.68024	0.755595	-2.22373	0.0261663	0.112973	Ampd3
ENSMUSG00000081896	18.2591	1.6801	0.963218	-1.74425	0.0811147	0.254793	Gm5389
ENSMUSG00000078942	105.775	1.67952	0.66641	-2.52026	0.0117269	0.0606619	Naip6
ENSMUSG00000070709	11.6651	1.67942	1.0817	-1.55257	0.120527	0.333259	1700049G17Rik
ENSMUSG00000092526	33.8265	1.67858	0.880472	-1.90645	0.0565917	0.198699	Gm17907
ENSMUSG00000099569	25.6726	1.67825	0.92766	-1.80912	0.0704319	0.229915	Gm18301
ENSMUSG00000027378	10.2253	1.67562	1.232	-1.36008	0.173805	0.4242	Nphp1
ENSMUSG00000025978	48.6567	1.67525	0.758468	-2.20872	0.027194	0.116528	Rftn2
ENSMUSG00000084022	12.4444	1.67502	1.05736	-1.58416	0.113158	0.319291	Gm16459
ENSMUSG00000046410	30.0927	1.6745	0.850464	-1.96893	0.0489615	0.17907	Kcnk6
ENSMUSG00000085894	23.5534	1.67381	1.07848	-1.552	0.120662	0.333346	Gm15832
ENSMUSG00000084137	8.60884	1.67326	1.17545	-1.4235	0.154591	0.393345	Gm9085
ENSMUSG00000081933	69.1144	1.67297	0.72699	-2.30123	0.0213786	0.0971031	Gm14767
ENSMUSG00000032508	4552.85	1.67289	0.534392	-3.13045	0.00174538	0.012764	Myd88
ENSMUSG00000001039	23.8971	1.67224	0.891434	-1.87589	0.0606699	0.208617	B9d1
ENSMUSG00000103291	20.9658	1.67106	0.964767	-1.73209	0.0832576	0.259488	Gm38235
ENSMUSG00000107961	324.427	1.67067	0.679186	-2.45982	0.0139009	0.0694348	Gm44036
ENSMUSG00000022508	251.317	1.66976	0.591641	-2.82225	0.00476885	0.0296966	Bcl6
ENSMUSG00000038679	1150.88	1.66931	0.56626	-2.94796	0.00319876	0.0213415	Trps1
ENSMUSG00000043415	23.606	1.66919	0.901246	-1.8521	0.0640121	0.215655	Otud1
ENSMUSG00000067336	121.96	1.66917	0.713538	-2.33929	0.0193205	0.0899016	Bmpr2
ENSMUSG00000085048	36.3532	1.66906	0.789654	-2.11366	0.0345443	0.139004	Gm15537
ENSMUSG00000051185	544.608	1.66901	0.58632	-2.84659	0.00441901	0.0278107	Fam174a
ENSMUSG00000033379	6001.21	1.66885	0.598928	-2.7864	0.00532978	0.032456	Atp6v0b
ENSMUSG00000025008	244.177	1.66798	0.667036	-2.50058	0.0123992	0.0633599	Tctn3
ENSMUSG00000002731	235.663	1.66748	0.666723	-2.50101	0.0123838	0.0633017	Prkra
ENSMUSG00000042726	5419.32	1.66579	0.701159	-2.37577	0.0175122	0.0828629	Trafd1
ENSMUSG00000024186	29.6991	1.66483	1.05256	-1.5817	0.113718	0.320193	Rgs11
ENSMUSG00000028893	440.429	1.66302	1.0146	-1.63909	0.101194	0.295338	Sesn2
ENSMUSG00000109243	7.94146	1.66297	1.21027	-1.37405	0.169427	0.417931	RP23-423B21.6
ENSMUSG00000035181	333.145	1.66243	0.5684	-2.92476	0.00344724	0.0226961	Heatr5a
ENSMUSG00000020828	188.042	1.66041	0.678893	-2.44576	0.0144546	0.0713971	Pld2
ENSMUSG00000104892	8.53046	1.65975	1.18423	-1.40155	0.161051	0.404628	Gm6615
ENSMUSG00000075273	45.9071	1.65965	0.785027	-2.11413	0.0345038	0.138875	Ttc30b
ENSMUSG00000005514	1379.71	1.65868	0.824025	-2.0129	0.0441248	0.166055	Por
ENSMUSG00000054612	24.4996	1.65767	0.873662	-1.89738	0.0577781	0.201417	Mgmt
ENSMUSG00000063931	1451.12	1.65742	0.553382	-2.99508	0.00274373	0.018752	Pepd
ENSMUSG00000020889	30.5478	1.65736	0.887583	-1.86727	0.061864	0.210897	Nr1d1
ENSMUSG00000097471	524.812	1.65644	0.625926	-2.64638	0.0081359	0.0454082	5830432E09Rik
ENSMUSG00000082762	69.2518	1.65522	0.717924	-2.30556	0.021135	0.0962152	Gm12366
ENSMUSG00000053931	917.236	1.65292	0.622312	-2.6561	0.00790498	0.0443517	Cnn3
ENSMUSG00000026223	3789.74	1.65211	0.755829	-2.18582	0.0288285	0.121384	Itm2c
ENSMUSG00000052419	1522.07	1.64984	0.563762	-2.92648	0.00342824	0.0226083	2610001J05Rik
ENSMUSG00000091942	3.96488	1.64936	1.46717	-1.12418	0.260937	0.541918	Gm17138
ENSMUSG00000090706	200.065	1.64903	0.619097	-2.66361	0.00773076	0.0435578	Gm17233
ENSMUSG00000020572	1990.83	1.64784	0.564613	-2.91852	0.00351695	0.02306	Nampt
ENSMUSG00000086107	62.807	1.6478	0.721811	-2.28287	0.022438	0.100459	Gm16312
ENSMUSG00000050244	603.493	1.64745	0.549965	-2.99556	0.00273943	0.0187306	Heatr1
ENSMUSG00000109498	46.9953	1.64722	0.767174	-2.14713	0.0317828	0.130508	RP24-344N22.4
ENSMUSG00000045312	120.835	1.64717	0.787045	-2.09286	0.0363621	0.143916	Lhfpl2
ENSMUSG00000021708	30.3843	1.64697	0.825891	-1.99418	0.0461327	0.171591	Rasgrf2
ENSMUSG00000033721	217.633	1.64631	0.617804	-2.66478	0.00770387	0.0434829	Vav3
ENSMUSG00000084583	8.96472	1.64629	1.17621	-1.39965	0.161617	0.40554	Gm25177
ENSMUSG00000029402	87.5911	1.64554	0.702415	-2.34268	0.0191457	0.0892701	Snrnp35
ENSMUSG00000000811	6.57801	1.64499	1.38386	-1.1887	0.234559	0.509941	Txnrd3
ENSMUSG00000000253	4.86058	1.64475	1.35799	-1.21116	0.225832	0.498009	Gmpr
ENSMUSG00000102525	4.67035	1.64188	1.37676	-1.19257	0.233039	0.508013	Gm37784
ENSMUSG00000108472	4.67035	1.64188	1.37676	-1.19257	0.233039	0.508013	RP23-84M17.5
ENSMUSG00000034121	166.172	1.64103	0.790903	-2.07488	0.0379981	0.14878	Mks1
ENSMUSG00000053835	1148.85	1.64082	0.575655	-2.85035	0.0043671	0.0275709	H2-T24
ENSMUSG00000072612	159.232	1.6401	0.785548	-2.08784	0.0368121	0.145276	Gm10382
ENSMUSG00000021453	535.708	1.63946	0.619208	-2.64767	0.00810492	0.0452952	Gadd45g
ENSMUSG00000045932	6735.47	1.63847	0.580586	-2.8221	0.00477101	0.0296985	Ifit2
ENSMUSG00000075162	8.22836	1.63792	1.25272	-1.30749	0.191047	0.45019	Gm10812
ENSMUSG00000030881	395.081	1.63761	0.701322	-2.33503	0.0195418	0.0907002	Arfip2
ENSMUSG00000022139	2134.49	1.6362	0.550776	-2.97071	0.0029711	0.0200571	Mbnl2
ENSMUSG00000085795	59.4555	1.6354	0.754358	-2.16793	0.0301638	0.125747	Zfp703
ENSMUSG00000073755	25.5571	1.63538	1.04251	-1.5687	0.116718	0.326062	5730409E04Rik
ENSMUSG00000004070	2907.99	1.63529	0.588367	-2.77936	0.00544655	0.0330412	Hmox2
ENSMUSG00000085604	154.217	1.63375	0.647784	-2.52206	0.011667	0.0604272	Dhx58os
ENSMUSG00000026200	233.538	1.63306	0.70203	-2.3262	0.0200078	0.0921074	Glb1l
ENSMUSG00000085912	3.78814	1.62972	1.43388	-1.13658	0.255714	0.535736	Trp53cor1
ENSMUSG00000034216	385.213	1.62876	0.85153	-1.91274	0.0557813	0.196761	Vps18
ENSMUSG00000028159	1623.33	1.6279	0.579743	-2.80797	0.00498542	0.0308051	Dapp1
ENSMUSG00000062098	30.6644	1.62756	0.833084	-1.95366	0.0507412	0.183832	Btbd3
ENSMUSG00000108500	3.42967	1.62591	1.52229	-1.06807	0.285489	0.567623	RP23-335G1.5
ENSMUSG00000019487	232.681	1.62587	0.873003	-1.86239	0.0625482	0.212019	Trip10
ENSMUSG00000063364	16.1257	1.62532	1.0339	-1.57203	0.115943	0.324301	3300002I08Rik
ENSMUSG00000040033	2912.38	1.62403	0.808864	-2.00779	0.0446651	0.167536	Stat2
[truncated: 13,981 more rows]
