# Supplementary material for: Invasive margin tissue-resident macrophages of high CD163 expression impede responses to T cell-based immunotherapy
Source: HighWire-hosted journal article supplement (doi:10.1136/jitc-2022-006433), 2023-03-01
Supplement: jitc-2022-006433supp004_data_supplement.xlsx [file jitc-2022-006433supp004_data_supplement.xlsx]

## Sheet: cytoscape
Supplementary table 3. CD163hi macrophages are involved in Wound healing, Blood vessel development and ECM remodeling. Related to Figure 6C. REViGO analysis of enriched GO terms in CD163hi macrophages compared to CD163dim macrophages. Main process pathway, pathway name, degree layout, dispensability, log size, uniqueness and values of processes enriched in CD163hi versus CD163dim macrophages .
Process	name	dispensability	log_size	uniqueness	value
Wound healing	antigen processing and presentation	0.363	2076	0.98	-1399
Wound healing	cell surface receptor signaling pathway	0.329	3318	0.896	-2817
Wound healing	cell-cell signaling	0.268	2938	0.971	-2112
Wound healing	cellular response to chemical stimulus	0.291	3438	0.926	-1.66
Wound healing	cellular response to endogenous stimulus	0.14	3031	0.954	-2.76
Wound healing	cellular response to growth factor stimulus	0.369	2665	0.913	-1806
Wound healing	enzyme linked receptor protein signaling pathway	0.058	2771	0.9	-4721
Wound healing	negative regulation of cellular process	0.313	3706	0.922	-3603
Wound healing	negative regulation of innate immune response	0.48	1934	0.946	-1.46
Wound healing	negative regulation of Wnt signaling pathway	0.294	2228	0.941	-1823
Wound healing	positive regulation of cell junction assembly	0.451	2097	0.918	-2112
Wound healing	positive regulation of cell population proliferation	0.272	3022	0.94	-1339
Wound healing	positive regulation of cellular component movement	0.226	2798	0.917	-1575
Wound healing	positive regulation of locomotion	0.059	2797	0.925	-1905
Wound healing	regulation of anatomical structure morphogenesis	0.0	2999	0.906	-4967
Wound healing	regulation of anatomical structure size	0.34	2754	0.952	-1585
Wound healing	regulation of blood circulation	0.435	2.43	0.939	-1481
Wound healing	regulation of body fluid levels	0.352	2559	0.954	-1.58
Wound healing	regulation of cell communication	0.112	3523	0.948	-1634
Wound healing	regulation of cell population proliferation	0.085	3252	0.954	-2138
Wound healing	regulation of cell projection organization	0.065	2881	0.921	-2.76
Wound healing	regulation of cell-substrate adhesion	0.051	2364	0.966	-1859
Wound healing	regulation of cellular component biogenesis	0.07	3004	0.958	-1485
Wound healing	regulation of cellular component organization	0.097	3388	0.951	-1931
Wound healing	regulation of cellular pH	0.274	1919	0.945	-1.42
Wound healing	regulation of cellular response to growth factor stimulus	0.053	2.48	0.954	-1906
Wound healing	regulation of developmental process	0.076	3426	0.955	-5438
Wound healing	regulation of extent of cell growth	0.452	2104	0.867	-1679
Wound healing	regulation of localization	0.098	3471	0.954	-1.77
Wound healing	regulation of locomotion	0.077	3031	0.961	-1977
Wound healing	regulation of molecular function	0.078	3487	0.962	-1514
Wound healing	regulation of multicellular organismal process	0.095	3465	0.954	-5298
Wound healing	regulation of peptidase activity	0.057	2707	0.945	-1481
Wound healing	regulation of phosphorus metabolic process	0.236	3168	0.936	-1339
Wound healing	regulation of protein metabolic process	0.329	3434	0.934	-1301
Wound healing	regulation of signal transduction	0.456	3464	0.937	-1822
Wound healing	regulation of signaling	0.102	3525	0.953	-1642
Wound healing	regulation of synapse organization	0.495	2423	0.913	-2112
Wound healing	regulation of synapse structure or activity	0.042	2438	0.956	-1962
Wound healing	regulation of system process	0.059	2811	0.932	-1.47
Wound healing	regulation of T cell mediated cytotoxicity	0.248	1505	0.961	-1868
Wound healing	regulation of transmembrane receptor protein serine/threonine kinase signaling pathway	0.37	2407	0.946	-1383
Wound healing	response to amino acid	0.105	2061	0.934	-1906
Wound healing	response to endogenous stimulus	0.161	3145	0.968	-1363
Wound healing	response to growth factor	0.432	2688	0.938	-1709
Wound healing	response to interferon-gamma	0.35	2124	0.915	-2416
Wound healing	response to organic cyclic compound	0.477	2977	0.935	-1322
Wound healing	response to wounding	0.122	2604	0.963	-2837
Wound healing	wound healing	0.364	2458	0.96	-2384
Blood vessel development	anatomical structure morphogenesis	0.385	3369	0.762	-10359
Blood vessel development	blood circulation	0.178	2641	0.88	-2976
Blood vessel development	blood vessel development	0.357	2.74	0.743	-7943
Blood vessel development	cell development	0.44	3284	0.74	-6265
Blood vessel development	cell fate commitment	0.246	2418	0.817	-1304
Blood vessel development	circulatory system development	0.0	2986	0.756	-7613
Blood vessel development	circulatory system process	0.435	2672	0.892	-2917
Blood vessel development	developmental growth	0.266	2665	0.81	-3979
Blood vessel development	embryo development	0.401	3087	0.757	-1906
Blood vessel development	endocrine system development	0.296	2143	0.811	-1387
Blood vessel development	eye development	0.381	2.62	0.763	-1579
Blood vessel development	forebrain development	0.355	2641	0.742	-1.74
Blood vessel development	formation of primary germ layer	0.456	2053	0.763	-2455
Blood vessel development	head development	0.32	2.92	0.8	-1435
Blood vessel development	maintenance of cell number	0.227	2158	0.849	-1569
Blood vessel development	mesenchymal cell differentiation	0.482	2241	0.755	-1663
Blood vessel development	mesenchyme development	0.317	2375	0.763	-2664
Blood vessel development	morphogenesis of a branching structure	0.493	2328	0.758	-1748
Blood vessel development	renal system development	0.334	2544	0.76	-2483
Blood vessel development	reproductive structure development	0.352	2704	0.766	-2073
Blood vessel development	reproductive system development	0.353	2708	0.776	-2073
Blood vessel development	sensory organ development	0.404	2.81	0.762	-1336
Blood vessel development	sensory system development	0.344	2629	0.781	-1463
Blood vessel development	stem cell population maintenance	0.227	2146	0.843	-1339
Blood vessel development	system process	0.246	3478	0.875	-4264
Blood vessel development	tissue development	0.435	3.26	0.771	-5807
Blood vessel development	tube development	0.365	2997	0.764	-5783
Blood vessel development	tube morphogenesis	0.349	2873	0.693	-6936
Blood vessel development	urogenital system development	0.34	2594	0.783	-2416
ECM remodeling	antigen processing and presentation of peptide antigen	0.0	1908	0.973	-3811
ECM remodeling	actin cytoskeleton organization	0.336	2737	0.933	-1361
ECM remodeling	cell junction assembly	0.232	2418	0.923	-1.74
ECM remodeling	cell junction organization	0.253	2.73	0.928	-3433
ECM remodeling	cell projection organization	0.31	3087	0.92	-3775
ECM remodeling	cytoskeleton organization	0.366	3.07	0.918	-2004
ECM remodeling	external encapsulating structure organization	0.234	2447	0.933	-5453
ECM remodeling	extracellular matrix organization	0.0	2444	0.921	-5453
ECM remodeling	extracellular structure organization	0.234	2447	0.933	-5453
ECM remodeling	integrin activation	0.326	0.954	0.955	-1304
ECM remodeling	lysosome organization	0.203	1875	0.934	-1477
ECM remodeling	plasma membrane organization	0.217	2152	0.938	-2664
ECM remodeling	supramolecular fiber organization	0.274	2711	0.928	-2348
Other	actin filament-based process	0.017	2779	0.99	-1.98
Other	biological adhesion	0.0	2954	1.0	-2591
Other	carbohydrate derivative catabolic process	0.0	2196	0.995	-2097
Other	cell adhesion	0.018	2949	0.975	-2584
Other	cell migration	0.015	2961	0.958	-3746
Other	cell population proliferation	0.017	2768	0.99	-1907
Other	collagen catabolic process	0.399	1643	0.995	-1583
Other	growth	0.0	2668	1.0	-1476
Other	localization of cell	0.34	3033	0.98	-3796
Other	locomotion	0.0	3115	1.0	-3985
Other	mitochondrial gene expression	0.13	1.94	0.998	-1.46
Other	monoamine transport	0.213	1447	0.994	-1339
Other	movement of cell or subcellular component	0.019	3181	0.988	-4264
Other	reproduction	0.0	3231	1.0	-2356
